# Supplementary material
Source: Research Square preprint supplement (doi:10.21203/rs.3.rs-8838287/v1)
Supplement: Supplementary file 1 [file 284b10473cc7ae8c35e04ed3.docx]

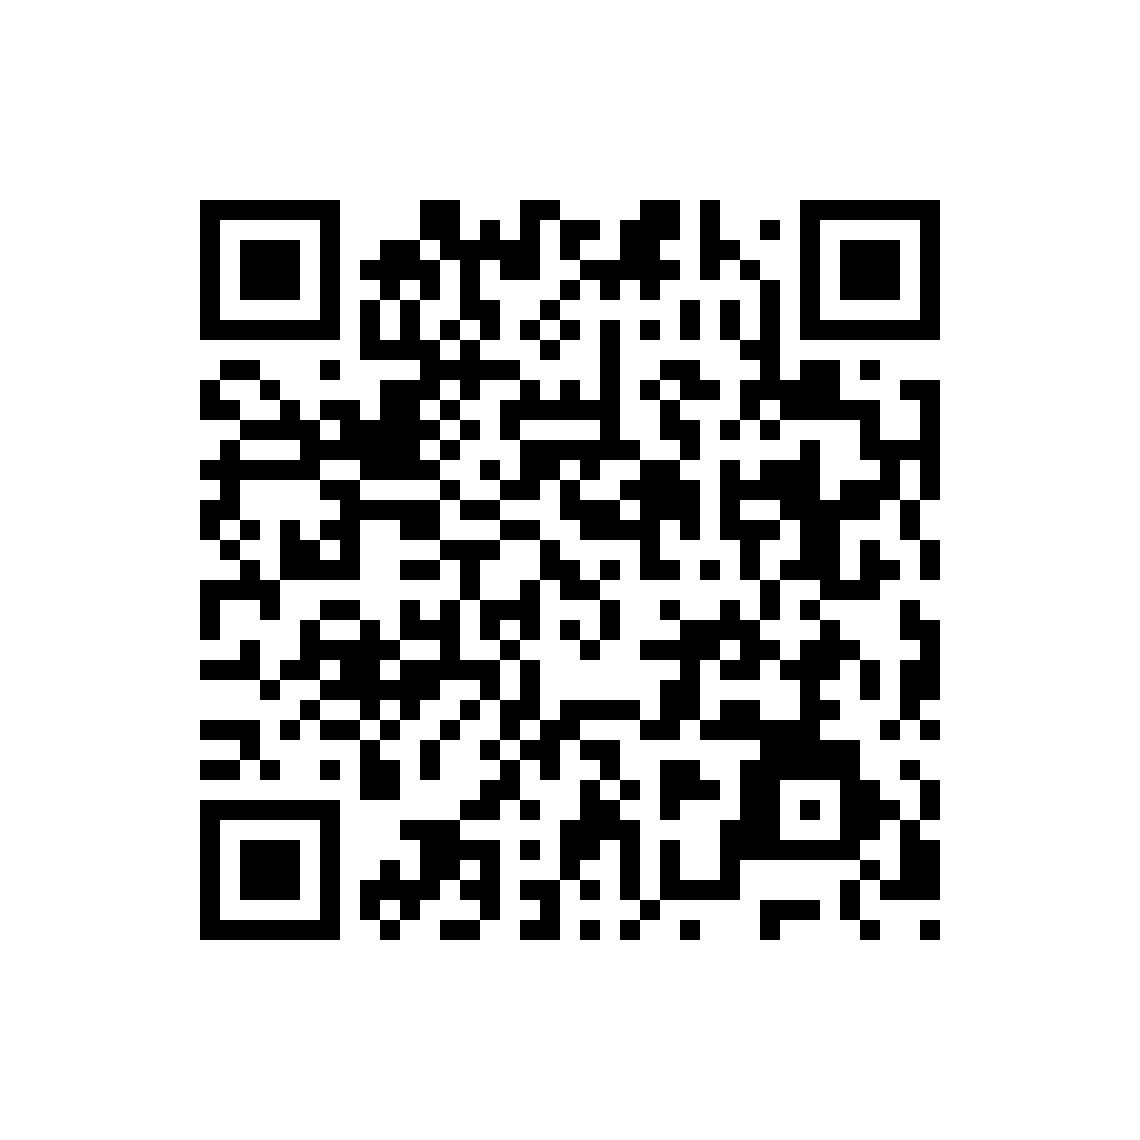
 1.The comprehensive dataset of control variables for listed companies (1413+ indicators) from 1990 to 2023 has been saved as a .dta file and stored in the Baidu Cloud Drive database. Link: https://pan.baidu.com/s/1oHrhRsnM0LPR40dQfZmSrA?pwd=lmx1, Extraction code: lmx1;

2.Original data source: CSMAR (Guotaian Database) https://data.csmar.com/
