# Supplementary material
Source: Research Square preprint supplement (doi:10.21203/rs.3.rs-8838287/v1)
Supplement: Supplementary file 2 [file 35a2772c817fa821d33d0df7.xlsx]

## Sheet: 审计委员会环保背景
id	year		所属省份			环保工作重视程度	词频	审计委员会成员		职位	是否独立董事	环保背景	审计委员会成员		职位	是否独立董事	环保背景	审计委员会成员		职位	是否独立董事	环保背景	审计委员会成员		职位	是否独立董事	环保背景	审计委员会成员		职位	是否独立董事	环保背景	审计委员会成员		职位	是否独立董事	环保背景	审计委员会成员		职位	是否独立董事	环保背景	审计委员会成员		职位	是否独立董事	环保背景	审计委员会成员
4	2016	42016	广东省	广东	广东2016	1.94591	0.0237664	孙俊英	42016孙俊英	独立董事	1	0	苏晓鹏	42016苏晓鹏	独立董事	1	1	吴涤非	42016吴涤非	董事	0			42016	#N/A	0			42016	#N/A	0			42016	#N/A	0			42016	#N/A	0			42016	#N/A	0			42016
4	2018	42018	广东省	广东	广东2018	2.56495	0.0175543	孙俊英	42018孙俊英	独立董事	1	0	苏晓鹏	42018苏晓鹏	独立董事	1	1	吴涤非	42018吴涤非	董事	0			42018	#N/A	0			42018	#N/A	0			42018	#N/A	0			42018	#N/A	0			42018	#N/A	0			42018
5	2010	52010	广东省	广东	广东2010	#N/A	0.0216352	蔡增正	52010蔡增正	独立董事	1	0	刘和平	52010刘和平	财务副总监	0		武良成	52010武良成	#N/A	0		薛丽娟	52010薛丽娟	#N/A	0		郑列列	52010郑列列	董事,总裁	0			52010	#N/A	0			52010	#N/A	0			52010	#N/A	0			52010
5	2011	52011	广东省	广东	广东2011	#N/A	0.0199093	蔡增正	52011蔡增正	独立董事	1	0	刘和平	52011刘和平	财务副总监	0		武良成	52011武良成	#N/A	0		薛丽娟	52011薛丽娟	#N/A	0		郑列列	52011郑列列	董事,总裁	0			52011	#N/A	0			52011	#N/A	0			52011	#N/A	0			52011
5	2013	52013	广东省	广东	广东2013	#N/A	0.0237707	戚聿东	52013戚聿东	独立董事	1	0	郑列列	52013郑列列	董事,总裁	0		丹尼尔·保泽方	52013丹尼尔·保泽方	董事,助理总裁	0		邹蓝	52013邹蓝	独立董事	1	0	李伟民	52013李伟民	独立董事	1	0		52013	#N/A	0			52013	#N/A	0			52013	#N/A	0			52013
7	2011	72011	广东省	广东	广东2011	#N/A	0.0199093	陈亮	72011陈亮	独立董事	1	0	叶健勇	72011叶健勇	董事	0		马浚诚	72011马浚诚	独立董事	1	0		72011	#N/A	0			72011	#N/A	0			72011	#N/A	0			72011	#N/A	0			72011	#N/A	0			72011
7	2016	72016	广东省	广东	广东2016	1.94591	0.0237664	胡开梁	72016胡开梁	独立董事	1	0	赵鹏	72016赵鹏	副董事长,总会计师,董事	0		卢剑波	72016卢剑波	独立董事	1	0		72016	#N/A	0			72016	#N/A	0			72016	#N/A	0			72016	#N/A	0			72016	#N/A	0			72016
7	2017	72017	广东省	广东	广东2017	2.70805	0.0163228	胡开梁	72017胡开梁	独立董事	1	0	赵鹏	72017赵鹏	副董事长,财务总监	0		卢剑波	72017卢剑波	独立董事	1	0		72017	#N/A	0			72017	#N/A	0			72017	#N/A	0			72017	#N/A	0			72017	#N/A	0			72017
7	2019	72019	广东省	广东	广东2019	2.77259	0.0140111	范起超	72019范起超	独立董事	1	0	徐栋	72019徐栋	独立董事	1	0	黄立海	72019黄立海	董事长	0			72019	#N/A	0			72019	#N/A	0			72019	#N/A	0			72019	#N/A	0			72019	#N/A	0			72019
7	2020	72020	广东省	广东	广东2020	2.83321	0.0174561	陈毅龙	72020陈毅龙	独立董事	1	0	田进	72020田进	独立董事	1	0	黄国铭	72020黄国铭	董事长	0			72020	#N/A	0			72020	#N/A	0			72020	#N/A	0			72020	#N/A	0			72020	#N/A	0			72020
7	2022	72022	广东省	广东	广东2022	9.96857	0.0155058	吴琼洁	72022吴琼洁	独立董事	1	0	卞欢	72022卞欢	独立董事	1	0	黄国铭	72022黄国铭	董事长	0			72022	#N/A	0			72022	#N/A	0			72022	#N/A	0			72022	#N/A	0			72022	#N/A	0			72022
7	2023	72023	广东省	广东	广东2023	9.88283	#N/A	卞欢	72023卞欢	独立董事	1	0	黄国铭	72023黄国铭	董事长	0		李媛媛	72023李媛媛	独立董事	1	0		72023	#N/A	0			72023	#N/A	0			72023	#N/A	0			72023	#N/A	0			72023	#N/A	0			72023
8	2010	82010	广东省	广东	广东2010	#N/A	0.0216352	邱创斌	82010邱创斌	独立董事	1	0	陈英伟	82010陈英伟	董事,副总经理	0		陈建华	82010陈建华	独立董事	1	0		82010	#N/A	0			82010	#N/A	0			82010	#N/A	0			82010	#N/A	0			82010	#N/A	0			82010
8	2011	82011	广东省	广东	广东2011	#N/A	0.0199093	邱创斌	82011邱创斌	独立董事	1	0	陈英伟	82011陈英伟	董事,副总经理	0		陈建华	82011陈建华	独立董事	1	0		82011	#N/A	0			82011	#N/A	0			82011	#N/A	0			82011	#N/A	0			82011	#N/A	0			82011
8	2014	82014	广东省	广东	广东2014	#N/A	0.0224623	陈广见	82014陈广见	独立董事	1	0	邱创斌	82014邱创斌	独立董事	1	0	徐进	82014徐进	独立董事	1	0		82014	#N/A	0			82014	#N/A	0			82014	#N/A	0			82014	#N/A	0			82014	#N/A	0			82014
8	2017	82017	北京市	北京	北京2017	#N/A	0.0270469	祝祖强	82017祝祖强	独立董事	1	0	张卫华	82017张卫华	独立董事	1	0	白斌	82017白斌	董事	0			82017	#N/A	0			82017	#N/A	0			82017	#N/A	0			82017	#N/A	0			82017	#N/A	0			82017
9	2012	92012	广东省	广东	广东2012	0.693147	0.0230561	邹传录	92012邹传录	独立董事	1	0	张珈荣	92012张珈荣	独立董事	1	0	邱仁初	92012邱仁初	董事局常务副主席	0			92012	#N/A	0			92012	#N/A	0			92012	#N/A	0			92012	#N/A	0			92012	#N/A	0			92012
9	2013	92013	广东省	广东	广东2013	#N/A	0.0237707	邹传录	92013邹传录	独立董事	1	0	郭朝辉	92013郭朝辉	独立董事	1	0	陈平	92013陈平	执行董事,执行总裁	0			92013	#N/A	0			92013	#N/A	0			92013	#N/A	0			92013	#N/A	0			92013	#N/A	0			92013
9	2014	92014	广东省	广东	广东2014	#N/A	0.0224623	邹传录	92014邹传录	独立董事	1	0	郭朝辉	92014郭朝辉	独立董事	1	0	陈平	92014陈平	执行董事,执行总裁	0			92014	#N/A	0			92014	#N/A	0			92014	#N/A	0			92014	#N/A	0			92014	#N/A	0			92014
9	2015	92015	广东省	广东	广东2015	0.693147	0.0185536	邹传录	92015邹传录	独立董事	1	0	郭朝辉	92015郭朝辉	独立董事	1	0	陈平	92015陈平	执行董事,执行总裁	0			92015	#N/A	0			92015	#N/A	0			92015	#N/A	0			92015	#N/A	0			92015	#N/A	0			92015
9	2022	92022	广东省	广东	广东2022	9.96857	0.0155058	李瑶	92022李瑶	独立董事	1	0	徐志鸿	92022徐志鸿	独立董事	1	0	陈平	92022陈平	职工董事,副总裁	0			92022	#N/A	0			92022	#N/A	0			92022	#N/A	0			92022	#N/A	0			92022	#N/A	0			92022
10	2012	102012	广东省	广东	广东2012	0.693147	0.0230561	夏鹏	102012夏鹏	董事长,独立董事	1	0	贺连英	102012贺连英	独立董事	1	0	童晓俐	102012童晓俐	董事	0			102012	#N/A	0			102012	#N/A	0			102012	#N/A	0			102012	#N/A	0			102012	#N/A	0			102012
10	2013	102013	广东省	广东	广东2013	#N/A	0.0237707	许东胜	102013许东胜	独立董事	1	0	贺连英	102013贺连英	独立董事	1	0	童晓俐	102013童晓俐	董事	0			102013	#N/A	0			102013	#N/A	0			102013	#N/A	0			102013	#N/A	0			102013	#N/A	0			102013
10	2014	102014	广东省	广东	广东2014	#N/A	0.0224623	肖祖核	102014肖祖核	独立董事	1	0	贺连英	102014贺连英	独立董事	1	0	蒋斌	102014蒋斌	副董事长	0			102014	#N/A	0			102014	#N/A	0			102014	#N/A	0			102014	#N/A	0			102014	#N/A	0			102014
12	2010	122010	广东省	广东	广东2010	#N/A	0.0216352	陈潮	122010陈潮	独立董事	1		李景奇	122010李景奇	董事	0		王天广	122010王天广	独立董事	1	0	谢如东	122010谢如东	独立董事	1	0	曾南	122010曾南	董事长,首席执行官	0			122010	#N/A	0			122010	#N/A	0			122010	#N/A	0			122010
16	2012	162012	广东省	广东	广东2012	0.693147	0.0230561	杨海英	162012杨海英	独立董事	1		冯羽涛	162012冯羽涛	独立董事	1	0	何海滨	162012何海滨	董事	0			162012	#N/A	0			162012	#N/A	0			162012	#N/A	0			162012	#N/A	0			162012	#N/A	0			162012
16	2013	162013	广东省	广东	广东2013	#N/A	0.0237707	杨海英	162013杨海英	独立董事	1		冯羽涛	162013冯羽涛	独立董事	1	0	何海滨	162013何海滨	董事	0			162013	#N/A	0			162013	#N/A	0			162013	#N/A	0			162013	#N/A	0			162013	#N/A	0			162013
16	2014	162014	广东省	广东	广东2014	#N/A	0.0224623	杨海英	162014杨海英	独立董事	1		冯羽涛	162014冯羽涛	独立董事	1	0	何海滨	162014何海滨	董事	0			162014	#N/A	0			162014	#N/A	0			162014	#N/A	0			162014	#N/A	0			162014	#N/A	0			162014
16	2016	162016	广东省	广东	广东2016	1.94591	0.0237664	张述华	162016张述华	独立董事	1		肖祖核	162016肖祖核	独立董事	1	0	何海滨	162016何海滨	董事	0			162016	#N/A	0			162016	#N/A	0			162016	#N/A	0			162016	#N/A	0			162016	#N/A	0			162016
16	2022	162022	广东省	广东	广东2022	9.96857	0.0155058	姚威	162022姚威	董事	0		王曙光	162022王曙光	独立董事	1	0	邓春华	162022邓春华	独立董事	1	0		162022	#N/A	0			162022	#N/A	0			162022	#N/A	0			162022	#N/A	0			162022	#N/A	0			162022
16	2023	162023	广东省	广东	广东2023	9.88283	#N/A	邓春华	162023邓春华	独立董事	1		姚威	162023姚威	董事	0		王曙光	162023王曙光	独立董事	1	0		162023	#N/A	0			162023	#N/A	0			162023	#N/A	0			162023	#N/A	0			162023	#N/A	0			162023
17	2014	172014	广东省	广东	广东2014	#N/A	0.0224623	陈叔军	172014陈叔军	独立董事	1		李冰	172014李冰	独立董事	1	0	曹方	172014曹方	董事	0			172014	#N/A	0			172014	#N/A	0			172014	#N/A	0			172014	#N/A	0			172014	#N/A	0			172014
17	2016	172016	广东省	广东	广东2016	1.94591	0.0237664	陈叔军	172016陈叔军	独立董事	1		李冰	172016李冰	独立董事	1	0	曹方	172016曹方	董事	0			172016	#N/A	0			172016	#N/A	0			172016	#N/A	0			172016	#N/A	0			172016	#N/A	0			172016
18	2011	182011	广东省	广东	广东2011	#N/A	0.0199093	金立刚	182011金立刚	独立董事	1		王天广	182011王天广	独立董事	1	0	张梅	182011张梅	董事	0		金立刚	182011金立刚	独立董事	1	0	王天广	182011王天广	独立董事	1	0	张梅	182011张梅	董事	0			182011	#N/A	0			182011	#N/A	0			182011
18	2012	182012	广东省	广东	广东2012	0.693147	0.0230561	王天广	182012王天广	独立董事	1		张梅	182012张梅	董事	0		金立刚	182012金立刚	独立董事	1	0		182012	#N/A	0			182012	#N/A	0			182012	#N/A	0			182012	#N/A	0			182012	#N/A	0			182012
19	2018	192018	广东省	广东	广东2018	2.56495	0.0175543	范值清	192018范值清	独立董事	1		陈灿松	192018陈灿松	独立董事	1	0	郑煜曦	192018郑煜曦	党委书记,董事长	0			192018	#N/A	0			192018	#N/A	0			192018	#N/A	0			192018	#N/A	0			192018	#N/A	0			192018
19	2023	192023	广东省	广东	广东2023	9.88283	#N/A	毕为民	192023毕为民	独立董事	1		赵如冰	192023赵如冰	独立董事	1	0	卢雨禾	192023卢雨禾	董事,财务总监	0			192023	#N/A	0			192023	#N/A	0			192023	#N/A	0			192023	#N/A	0			192023	#N/A	0			192023
21	2013	212013	广东省	广东	广东2013	#N/A	0.0237707	周俊祥	212013周俊祥	独立董事	1		张鹏	212013张鹏	独立董事	1	0		212013	#N/A	0			212013	#N/A	0			212013	#N/A	0			212013	#N/A	0			212013	#N/A	0			212013	#N/A	0			212013
25	2010	252010	广东省	广东	广东2010	#N/A	0.0216352	傅斌	252010傅斌	董事,财务总监	0		季德钧	252010季德钧	独立董事	1	0	李明俊	252010李明俊	#N/A	0		石卫红	252010石卫红	#N/A	0		周成新	252010周成新	#N/A	0			252010	#N/A	0			252010	#N/A	0			252010	#N/A	0			252010
28	2010	282010	广东省	广东	广东2010	#N/A	0.0216352	彭娟	282010彭娟	独立董事	1		何志毅	282010何志毅	独立董事	1	0	吴爱民	282010吴爱民	董事	0			282010	#N/A	0			282010	#N/A	0			282010	#N/A	0			282010	#N/A	0			282010	#N/A	0			282010
28	2015	282015	广东省	广东	广东2015	0.693147	0.0185536	熊楚熊	282015熊楚熊	独立董事	1		何志毅	282015何志毅	独立董事	1	0	肖胜方	282015肖胜方	独立董事	1	0	马万军	282015马万军	董事	0		姜修昌	282015姜修昌	董事	0		崔昳昤	282015崔昳昤	副董事长	0			282015	#N/A	0			282015	#N/A	0			282015
30	2010	302010	广东省	广东	广东2010	#N/A	0.0216352	潘承东	302010潘承东	独立董事	1		邵良志	302010邵良志	独立董事	1	0	余德山	302010余德山	#N/A	0			302010	#N/A	0			302010	#N/A	0			302010	#N/A	0			302010	#N/A	0			302010	#N/A	0			302010
30	2011	302011	广东省	广东	广东2011	#N/A	0.0199093	潘承东	302011潘承东	独立董事	1		邵良志	302011邵良志	独立董事	1	0	魏传义	302011魏传义	副总经理,董事,董事会秘书	0			302011	#N/A	0			302011	#N/A	0			302011	#N/A	0			302011	#N/A	0			302011	#N/A	0			302011
30	2012	302012	广东省	广东	广东2012	0.693147	0.0230561	潘承东	302012潘承东	独立董事	1		邵良志	302012邵良志	独立董事	1	0	魏传义	302012魏传义	董事,副总经理,董事会秘书	0			302012	#N/A	0			302012	#N/A	0			302012	#N/A	0			302012	#N/A	0			302012	#N/A	0			302012
30	2017	302017	广东省	广东	广东2017	2.70805	0.0163228		302017	#N/A	0			302017	#N/A	0			302017	#N/A	0			302017	#N/A	0			302017	#N/A	0			302017	#N/A	0			302017	#N/A	0			302017	#N/A	0			302017
33	2015	332015	广东省	广东	广东2015	0.693147	0.0185536		332015	#N/A	0			332015	#N/A	0			332015	#N/A	0			332015	#N/A	0			332015	#N/A	0			332015	#N/A	0			332015	#N/A	0			332015	#N/A	0			332015
35	2014	352014	江苏省	江苏	江苏2014	#N/A	0.0247383	杨东升	352014杨东升	独立董事	1		严圣军	352014严圣军	董事长	0		吕长江	352014吕长江	独立董事	1	0		352014	#N/A	0			352014	#N/A	0			352014	#N/A	0			352014	#N/A	0			352014	#N/A	0			352014
35	2017	352017	江苏省	江苏	江苏2017	2.48491	0.0210849	杨东升	352017杨东升	独立董事	1		严圣军	352017严圣军	董事长	0		洪剑峭	352017洪剑峭	独立董事	1	0		352017	#N/A	0			352017	#N/A	0			352017	#N/A	0			352017	#N/A	0			352017	#N/A	0			352017
35	2018	352018	江苏省	江苏	江苏2018	2.56495	0.0202007	赵亚娟	352018赵亚娟	独立董事	1		严圣军	352018严圣军	董事长	0		洪剑峭	352018洪剑峭	独立董事	1	0		352018	#N/A	0			352018	#N/A	0			352018	#N/A	0			352018	#N/A	0			352018	#N/A	0			352018
38	2011	382011	江苏省	江苏	江苏2011	#N/A	0.0206757	肖勤福	382011肖勤福	独立董事	1		张世兴	382011张世兴	独立董事	1	0	张庆文	382011张庆文	董事	0			382011	#N/A	0			382011	#N/A	0			382011	#N/A	0			382011	#N/A	0			382011	#N/A	0			382011
38	2016	382016	江苏省	江苏	江苏2016	0.693147	0.0231946	齐二石	382016齐二石	独立董事	1		张世兴	382016张世兴	独立董事	1	0	于秀庆	382016于秀庆	非独立董事	0			382016	#N/A	0			382016	#N/A	0			382016	#N/A	0			382016	#N/A	0			382016	#N/A	0			382016
38	2020	382020	江苏省	江苏	江苏2020	3.17805	0.0181944	樊培银	382020樊培银	独立董事	1	1	赵息	382020赵息	独立董事	1	0	常建才	382020常建才	非独立董事	0			382020	#N/A	0			382020	#N/A	0			382020	#N/A	0			382020	#N/A	0			382020	#N/A	0			382020
39	2022	392022	广东省	广东	广东2022	9.96857	0.0155058	吕冯美仪	392022吕冯美仪	独立董事	1		杨雄	392022杨雄	独立非执行董事	1	0	张光华	392022张光华	独立非执行董事	1	0		392022	#N/A	0			392022	#N/A	0			392022	#N/A	0			392022	#N/A	0			392022	#N/A	0			392022
40	2010	402010	广东省	广东	广东2010	#N/A	0.0216352	徐志新	402010徐志新	独立董事	1		陈凤娇	402010陈凤娇	独立董事	1	0	何祥增	402010何祥增	独立董事	1	1	颜金辉	402010颜金辉	董事,副总裁	0		郭山清	402010郭山清	董事	0			402010	#N/A	0			402010	#N/A	0			402010	#N/A	0			402010
40	2011	402011	广东省	广东	广东2011	#N/A	0.0199093	徐志新	402011徐志新	独立董事	1		陈凤娇	402011陈凤娇	独立董事	1	0	何祥增	402011何祥增	独立董事	1	0	颜金辉	402011颜金辉	董事局副主席	0		郭山清	402011郭山清	董事	0			402011	#N/A	0			402011	#N/A	0			402011	#N/A	0			402011
40	2012	402012	广东省	广东	广东2012	0.693147	0.0230561	徐志新	402012徐志新	独立董事	1		陈凤娇	402012陈凤娇	独立董事	1	0	何祥增	402012何祥增	独立董事	1	0	颜金辉	402012颜金辉	副董事长	0		郭山清	402012郭山清	董事	0			402012	#N/A	0			402012	#N/A	0			402012	#N/A	0			402012
43	2017	432017	广东省	广东	广东2017	2.70805	0.0163228		432017	#N/A	0			432017	#N/A	0			432017	#N/A	0			432017	#N/A	0			432017	#N/A	0			432017	#N/A	0			432017	#N/A	0			432017	#N/A	0			432017
49	2013	492013	北京市	北京	北京2013	#N/A	0.0228363	李春歌	492013李春歌	独立董事	1		温绍海	492013温绍海	独立董事	1	0	陈国英	492013陈国英	独立董事	1	0	李兵兵	492013李兵兵	董事	0		陈文	492013陈文	董事	0			492013	#N/A	0			492013	#N/A	0			492013	#N/A	0			492013
50	2011	502011	广东省	广东	广东2011	#N/A	0.0199093		502011	#N/A	0			502011	#N/A	0			502011	#N/A	0			502011	#N/A	0			502011	#N/A	0			502011	#N/A	0			502011	#N/A	0			502011	#N/A	0			502011
50	2023	502023	广东省	广东	广东2023	9.88283	#N/A		502023	#N/A	0			502023	#N/A	0			502023	#N/A	0			502023	#N/A	0			502023	#N/A	0			502023	#N/A	0			502023	#N/A	0			502023	#N/A	0			502023
56	2016	562016	广东省	广东	广东2016	1.94591	0.0237664	熊楚熊	562016熊楚熊	独立董事	1		谢汝煊	562016谢汝煊	独立董事	1	0	孙昌兴	562016孙昌兴	独立董事	1	0	唐若民	562016唐若民	董事	0		刘晓红	562016刘晓红	董事,监事会主席	0			562016	#N/A	0			562016	#N/A	0			562016	#N/A	0			562016
56	2019	562019	广东省	广东	广东2019	2.77259	0.0140111	刘海波	562019刘海波	非独立董事	0		汪军民	562019汪军民	独立董事	1	0	熊楚熊	562019熊楚熊	独立董事	1	0	王培	562019王培	独立董事	1	0	邢福俊	562019邢福俊	副董事长	0			562019	#N/A	0			562019	#N/A	0			562019	#N/A	0			562019
58	2014	582014	广东省	广东	广东2014	#N/A	0.0224623	周含军	582014周含军	独立董事	1		李罗力	582014李罗力	独立董事	1	0	宋萍萍	582014宋萍萍	独立董事	1	0	张光柳	582014张光柳	董事	0		叶军	582014叶军	董事	0			582014	#N/A	0			582014	#N/A	0			582014	#N/A	0			582014
59	2010	592010	辽宁省	辽宁	辽宁2010	#N/A	0.0159287	王萍	592010王萍	独立董事	1		高闯	592010高闯	独立董事	1	0	康锦江	592010康锦江	独立董事	1	0	王久洲	592010王久洲	监事会主席	0		于国宏	592010于国宏	董事	0			592010	#N/A	0			592010	#N/A	0			592010	#N/A	0			592010
60	2012	602012	广东省	广东	广东2012	0.693147	0.0230561	陈少纯	602012陈少纯	独立董事	1		朱卫平	602012朱卫平	独立董事	1	0	熊楚熊	602012熊楚熊	独立董事	1	0	董保玉	602012董保玉	董事,党委书记,常务副总裁	0		陈振亮	602012陈振亮	董事	0			602012	#N/A	0			602012	#N/A	0			602012	#N/A	0			602012
60	2018	602018	广东省	广东	广东2018	2.56495	0.0175543	李映照	602018李映照	独立董事	1	1	马建华	602018马建华	董事	0		王立新	602018王立新	董事	0		周永章	602018周永章	独立董事	1	0	刘放来	602018刘放来	独立董事	1	0		602018	#N/A	0			602018	#N/A	0			602018	#N/A	0			602018
61	2012	612012	广东省	广东	广东2012	0.693147	0.0230561	曾湃	612012曾湃	董事,总经理	0		马彦钊	612012马彦钊	#N/A	0		肖幼美	612012肖幼美	独立董事	1	0	刘震国	612012刘震国	独立董事	1	0		612012	#N/A	0			612012	#N/A	0			612012	#N/A	0			612012	#N/A	0			612012
61	2013	612013	广东省	广东	广东2013	#N/A	0.0237707	胡翔海	612013胡翔海	董事,总经理	0		肖幼美	612013肖幼美	独立董事	1	0	汪兴益	612013汪兴益	独立董事	1	0	刘震国	612013刘震国	独立董事	1	0		612013	#N/A	0			612013	#N/A	0			612013	#N/A	0			612013	#N/A	0			612013
61	2014	612014	广东省	广东	广东2014	#N/A	0.0224623	胡翔海	612014胡翔海	董事,总经理	0		肖幼美	612014肖幼美	独立董事	1	0	汪兴益	612014汪兴益	独立董事	1	0	刘震国	612014刘震国	独立董事	1	0		612014	#N/A	0			612014	#N/A	0			612014	#N/A	0			612014	#N/A	0			612014
61	2017	612017	广东省	广东	广东2017	2.70805	0.0163228	梅月欣	612017梅月欣	独立董事	1		胡翔海	612017胡翔海	董事,总经理	0		张志勇	612017张志勇	独立董事	1	0	王丽娜	612017王丽娜	独立董事	1	0		612017	#N/A	0			612017	#N/A	0			612017	#N/A	0			612017	#N/A	0			612017
61	2023	612023	广东省	广东	广东2023	9.88283	#N/A	梅月欣	612023梅月欣	独立董事	1	1	王丽娜	612023王丽娜	独立董事	1	0	刘科	612023刘科	独立董事	1	1	向自力	612023向自力	董事,财务总监	0			612023	#N/A	0			612023	#N/A	0			612023	#N/A	0			612023	#N/A	0			612023
63	2022	632022	广东省	广东	广东2022	9.96857	0.0155058	李步青	632022李步青	非独立董事	0		蔡曼莉	632022蔡曼莉	独立董事	1	0	诸为民	632022诸为民	非独立董事	0		吴君栋	632022吴君栋	独立董事	1	0	庄坚胜	632022庄坚胜	独立非执行董事	1	0		632022	#N/A	0			632022	#N/A	0			632022	#N/A	0			632022
65	2010	652010	北京市	北京	北京2010	0.693147	0.0194632	陈晓	652010陈晓	#N/A	0		王金平	652010王金平	#N/A	0		谢兴国	652010谢兴国	#N/A	0		陈龙	652010陈龙	董事	0			652010	#N/A	0			652010	#N/A	0			652010	#N/A	0			652010	#N/A	0			652010
65	2013	652013	北京市	北京	北京2013	#N/A	0.0228363	刘健哲	652013刘健哲	董事,副总经理	0		周立	652013周立	独立董事	1	0	王小军	652013王小军	独立董事	1	0		652013	#N/A	0			652013	#N/A	0			652013	#N/A	0			652013	#N/A	0			652013	#N/A	0			652013
65	2014	652014	北京市	北京	北京2014	#N/A	0.0259314	刘健哲	652014刘健哲	董事,副总经理	0		周立	652014周立	独立董事	1	0	王小军	652014王小军	独立董事	1	0		652014	#N/A	0			652014	#N/A	0			652014	#N/A	0			652014	#N/A	0			652014	#N/A	0			652014
66	2021	662021	广东省	广东	广东2021	9.67149	0.0144675	邱洪生	662021邱洪生	独立董事	1	1		662021	#N/A	0			662021	#N/A	0			662021	#N/A	0			662021	#N/A	0			662021	#N/A	0			662021	#N/A	0			662021	#N/A	0			662021
66	2023	662023	广东省	广东	广东2023	9.88283	#N/A	邱洪生	662023邱洪生	独立董事	1	1		662023	#N/A	0			662023	#N/A	0			662023	#N/A	0			662023	#N/A	0			662023	#N/A	0			662023	#N/A	0			662023	#N/A	0			662023
68	2016	682016	广东省	广东	广东2016	1.94591	0.0237664	林涛	682016林涛	独立董事	1		郑丹	682016郑丹	监事会主席	0		宋晏	682016宋晏	独立董事	1	0		682016	#N/A	0			682016	#N/A	0			682016	#N/A	0			682016	#N/A	0			682016	#N/A	0			682016
68	2017	682017	广东省	广东	广东2017	2.70805	0.0163228	林涛	682017林涛	独立董事	1		郑丹	682017郑丹	监事会主席	0		宋晏	682017宋晏	独立董事	1	0		682017	#N/A	0			682017	#N/A	0			682017	#N/A	0			682017	#N/A	0			682017	#N/A	0			682017
68	2018	682018	广东省	广东	广东2018	2.56495	0.0175543	林涛	682018林涛	独立董事	1		郑丹	682018郑丹	监事会主席,监事	0		宋晏	682018宋晏	#N/A	0		任意	682018任意	独立董事	1	0		682018	#N/A	0			682018	#N/A	0			682018	#N/A	0			682018	#N/A	0			682018
68	2019	682019	广东省	广东	广东2019	2.77259	0.0140111	林涛	682019林涛	独立董事	1		郑丹	682019郑丹	监事会主席,监事	0		宋晏	682019宋晏	#N/A	0		任意	682019任意	独立董事	1	0		682019	#N/A	0			682019	#N/A	0			682019	#N/A	0			682019	#N/A	0			682019
69	2017	692017	广东省	广东	广东2017	2.70805	0.0163228	吴安迪	692017吴安迪	独立董事	1		许刚	692017许刚	独立董事	1	0	王久玲	692017王久玲	董事	0			692017	#N/A	0			692017	#N/A	0			692017	#N/A	0			692017	#N/A	0			692017	#N/A	0			692017
70	2016	702016	广东省	广东	广东2016	1.94591	0.0237664	王继中	702016王继中	独立董事	1		韦岗	702016韦岗	独立董事	1	0	王宇新	702016王宇新	独立董事	1	0	李明俊	702016李明俊	董事	0		张心亮	702016张心亮	非独立董事,财务总监	0			702016	#N/A	0			702016	#N/A	0			702016	#N/A	0			702016
78	2010	782010	广东省	广东	广东2010	#N/A	0.0216352	黎拯民	782010黎拯民	#N/A	0		王美月	782010王美月	#N/A	0		熊楚熊	782010熊楚熊	#N/A	0		张文周	782010张文周	#N/A	0		张锋	782010张锋	董事,董事局副主席	0			782010	#N/A	0			782010	#N/A	0			782010	#N/A	0			782010
78	2011	782011	广东省	广东	广东2011	#N/A	0.0199093	章顺文	782011章顺文	独立董事	1		李罗力	782011李罗力	独立董事	1	0	黄耀文	782011黄耀文	独立董事	1	0	果德安	782011果德安	独立董事	1	0	张锋	782011张锋	董事,董事局副主席	0		俞蓓芬	782011俞蓓芬	董事	0			782011	#N/A	0		于琳	782011于琳	董事,副总裁	0			782011
78	2012	782012	广东省	广东	广东2012	0.693147	0.0230561	章顺文	782012章顺文	独立董事	1		李罗力	782012李罗力	独立董事	1	0	黄耀文	782012黄耀文	独立董事	1	0	果德安	782012果德安	独立董事	1	0	张锋	782012张锋	董事局副主席	0		俞蓓芬	782012俞蓓芬	董事	0			782012	#N/A	0		于琳	782012于琳	董事,副总裁	0			782012
78	2013	782013	广东省	广东	广东2013	#N/A	0.0237707	章顺文	782013章顺文	独立董事	1		李罗力	782013李罗力	独立董事	1	0	黄耀文	782013黄耀文	独立董事	1	0	果德安	782013果德安	独立董事	1	0	张锋	782013张锋	董事局副主席	0		俞蓓芬	782013俞蓓芬	董事	0			782013	#N/A	0		于琳	782013于琳	董事,副总裁	0			782013
78	2014	782014	广东省	广东	广东2014	#N/A	0.0224623	詹伟哉	782014詹伟哉	独立董事	1		李罗力	782014李罗力	独立董事	1	0	吴韬	782014吴韬	独立董事	1	0	张思民	782014张思民	董事局主席	0		张锋	782014张锋	董事局副主席	0			782014	#N/A	0			782014	#N/A	0			782014	#N/A	0			782014
90	2020	902020	广东省	广东	广东2020	2.83321	0.0174561	潘同文	902020潘同文	独立董事	1		何云武	902020何云武	非独立董事,总裁,党委副书记	0		林婵波	902020林婵波	非独立董事,党委副书记	0		郭刚	902020郭刚	独立董事	1	0	徐燕松	902020徐燕松	独立董事	1	0		902020	#N/A	0			902020	#N/A	0			902020	#N/A	0			902020
90	2023	902023	广东省	广东	广东2023	9.88283	#N/A	向德伟	902023向德伟	独立董事	1		方东红	902023方东红	非独立董事	0		李希元	902023李希元	独立董事	1	0	叶旺春	902023叶旺春	独立董事	1	0		902023	#N/A	0			902023	#N/A	0			902023	#N/A	0			902023	#N/A	0			902023
96	2017	962017	广东省	广东	广东2017	2.70805	0.0163228	谢家伟	962017谢家伟	独立董事	1		刘全胜	962017刘全胜	独立董事	1	0	罗元清	962017罗元清	独立董事	1	0	邵瑞庆	962017邵瑞庆	独立董事	1	0	李洪生	962017李洪生	董事,总经理	0			962017	#N/A	0			962017	#N/A	0			962017	#N/A	0			962017
100	2020	1002020	广东省	广东	广东2020	2.83321	0.0174561	卢馨	1002020卢馨	独立董事	1		周国富	1002020周国富	独立董事	1	0	黄旭斌	1002020黄旭斌	#N/A	0		杜娟	1002020杜娟	执行董事	0			1002020	#N/A	0			1002020	#N/A	0			1002020	#N/A	0			1002020	#N/A	0			1002020
100	2022	1002022	广东省	广东	广东2022	9.96857	0.0155058	杜娟	1002022杜娟	执行董事	0		陈十一	1002022陈十一	独立董事	1	0	万良勇	1002022万良勇	独立董事	1	0		1002022	#N/A	0			1002022	#N/A	0			1002022	#N/A	0			1002022	#N/A	0			1002022	#N/A	0			1002022
150	2010	1502010	广东省	广东	广东2010	#N/A	0.0216352	陈奕民	1502010陈奕民	董事,总经理	0		胡坚	1502010胡坚	独立董事	1	0	谭劲松	1502010谭劲松	独立董事	1	0		1502010	#N/A	0			1502010	#N/A	0			1502010	#N/A	0			1502010	#N/A	0			1502010	#N/A	0			1502010
150	2017	1502017	广东省	广东	广东2017	2.70805	0.0163228	夏成才	1502017夏成才	独立董事	1		陈奕民	1502017陈奕民	董事长	0		谭燕	1502017谭燕	独立董事	1	0		1502017	#N/A	0			1502017	#N/A	0			1502017	#N/A	0			1502017	#N/A	0			1502017	#N/A	0			1502017
151	2014	1512014	广东省	广东	广东2014	#N/A	0.0224623	马朝松	1512014马朝松	独立董事	1		陈宋生	1512014陈宋生	独立董事	1	0	江华	1512014江华	独立董事	1	0	张朋	1512014张朋	董事,董事会秘书,财务总监	0		黄晖	1512014黄晖	职工董事	0			1512014	#N/A	0			1512014	#N/A	0			1512014	#N/A	0			1512014
151	2015	1512015	广东省	广东	广东2015	0.693147	0.0185536	马朝松	1512015马朝松	独立董事	1		陈宋生	1512015陈宋生	独立董事	1	0	江华	1512015江华	独立董事	1	0	刘艳	1512015刘艳	董事	0		黄晖	1512015黄晖	职工董事	0			1512015	#N/A	0			1512015	#N/A	0			1512015	#N/A	0			1512015
151	2016	1512016	广东省	广东	广东2016	1.94591	0.0237664	马朝松	1512016马朝松	独立董事	1		陈宋生	1512016陈宋生	独立董事	1	0	江华	1512016江华	独立董事	1	0	刘艳	1512016刘艳	董事长	0		黄晖	1512016黄晖	职工董事	0			1512016	#N/A	0			1512016	#N/A	0			1512016	#N/A	0			1512016
151	2023	1512023	广东省	广东	广东2023	9.88283	#N/A	许建军	1512023许建军	独立董事	1	1	宋东升	1512023宋东升	独立董事	1	1	罗鸿达	1512023罗鸿达	非独立董事,监事,监事会主席	0		梅运河	1512023梅运河	独立董事	1	0	王晓菲	1512023王晓菲	非独立董事	0			1512023	#N/A	0			1512023	#N/A	0			1512023	#N/A	0			1512023
153	2012	1532012	广东省	广东	广东2012	0.693147	0.0230561	乔如林	1532012乔如林	独立董事	1		周自学	1532012周自学	董事,副总经理	0		何广卫	1532012何广卫	独立董事	1	0		1532012	#N/A	0			1532012	#N/A	0			1532012	#N/A	0			1532012	#N/A	0			1532012	#N/A	0			1532012
153	2013	1532013	广东省	广东	广东2013	#N/A	0.0237707	张瑞稳	1532013张瑞稳	独立董事	1		廉保华	1532013廉保华	董事,副总经理	0		何广卫	1532013何广卫	独立董事	1	0		1532013	#N/A	0			1532013	#N/A	0			1532013	#N/A	0			1532013	#N/A	0			1532013	#N/A	0			1532013
153	2022	1532022	广东省	广东	广东2022	9.96857	0.0155058	汝添乐	1532022汝添乐	非独立董事,总经理,副总经理	0		朱卫东	1532022朱卫东	独立董事	1	0	陈结淼	1532022陈结淼	独立董事	1	0		1532022	#N/A	0			1532022	#N/A	0			1532022	#N/A	0			1532022	#N/A	0			1532022	#N/A	0			1532022
153	2023	1532023	广东省	广东	广东2023	9.88283	#N/A	汝添乐	1532023汝添乐	非独立董事,总经理	0		朱卫东	1532023朱卫东	独立董事	1	0	陈结淼	1532023陈结淼	独立董事	1	0		1532023	#N/A	0			1532023	#N/A	0			1532023	#N/A	0			1532023	#N/A	0			1532023	#N/A	0			1532023
156	2010	1562010	广东省	广东	广东2010	#N/A	0.0216352	王政	1562010王政	#N/A	0		肖畅	1562010肖畅	独立董事	1	0	赵德军	1562010赵德军	独立董事	1	0		1562010	#N/A	0			1562010	#N/A	0			1562010	#N/A	0			1562010	#N/A	0			1562010	#N/A	0			1562010
156	2014	1562014	浙江省	浙江	浙江2014	#N/A	0.0278689	俞乐平	1562014俞乐平	独立董事	1	1	沈林华	1562014沈林华	董事	0		韩灵丽	1562014韩灵丽	独立董事	1	0		1562014	#N/A	0			1562014	#N/A	0			1562014	#N/A	0			1562014	#N/A	0			1562014	#N/A	0			1562014
156	2017	1562017	浙江省	浙江	浙江2017	1.09861	0.0181469	许倩	1562017许倩	独立董事	1		董安生	1562017董安生	独立董事	1	0	沈林华	1562017沈林华	董事	0			1562017	#N/A	0			1562017	#N/A	0			1562017	#N/A	0			1562017	#N/A	0			1562017	#N/A	0			1562017
157	2012	1572012	湖南省	湖南	湖南2012	0.693147	0.018989	钱世政	1572012钱世政	独立董事	1		刘长琨	1572012刘长琨	独立非执行董事	1	0	邱中伟	1572012邱中伟	非执行董事	0			1572012	#N/A	0			1572012	#N/A	0			1572012	#N/A	0			1572012	#N/A	0			1572012	#N/A	0			1572012
157	2019	1572019	湖南省	湖南	湖南2019	5.95584	0.0183731	刘桂良	1572019刘桂良	独立董事	1		贺柳	1572019贺柳	董事	0		赵嵩正	1572019赵嵩正	独立董事	1	0		1572019	#N/A	0			1572019	#N/A	0			1572019	#N/A	0			1572019	#N/A	0			1572019	#N/A	0			1572019
157	2020	1572020	湖南省	湖南	湖南2020	6.28227	0.0176416	刘桂良	1572020刘桂良	独立董事	1		贺柳	1572020贺柳	董事	0		赵嵩正	1572020赵嵩正	独立董事	1	0		1572020	#N/A	0			1572020	#N/A	0			1572020	#N/A	0			1572020	#N/A	0			1572020	#N/A	0			1572020
333	2015	3332015	广东省	广东	广东2015	0.693147	0.0185536	方洪波	3332015方洪波	董事长,总裁	0		黎文靖	3332015黎文靖	独立董事	1	1	吴世农	3332015吴世农	独立董事	1	0	符正平	3332015符正平	独立董事	1	0	袁利群	3332015袁利群	董事,高级副总裁,财务总监	0			3332015	#N/A	0			3332015	#N/A	0			3332015	#N/A	0			3332015
338	2017	3382017	山东省	山东	山东2017	2.07944	0.0146452		3382017	#N/A	0			3382017	#N/A	0			3382017	#N/A	0			3382017	#N/A	0			3382017	#N/A	0			3382017	#N/A	0			3382017	#N/A	0			3382017	#N/A	0			3382017
338	2020	3382020	山东省	山东	山东2020	3.49651	0.0128581		3382020	#N/A	0			3382020	#N/A	0			3382020	#N/A	0			3382020	#N/A	0			3382020	#N/A	0			3382020	#N/A	0			3382020	#N/A	0			3382020	#N/A	0			3382020
400	2011	4002011	河南省	河南	河南2011	#N/A	0.01806	于世新	4002011于世新	董事	0		马保州	4002011马保州	董事,常务副总经理,总会计师	0		潘飞	4002011潘飞	独立董事	1	0	耿明斋	4002011耿明斋	独立董事	1	0	田土城	4002011田土城	独立董事	1	0		4002011	#N/A	0			4002011	#N/A	0			4002011	#N/A	0			4002011
400	2013	4002013	河南省	河南	河南2013	1.79176	0.0150365	薛玉莲	4002013薛玉莲	独立董事	1		马保州	4002013马保州	董事,副总经理,总会计师	0		耿明斋	4002013耿明斋	独立董事	1	0	田土城	4002013田土城	独立董事	1	0		4002013	#N/A	0			4002013	#N/A	0			4002013	#N/A	0			4002013	#N/A	0			4002013
400	2014	4002014	河南省	河南	河南2014	2.3979	0.0182527	肖忠文	4002014肖忠文	董事	0		马保州	4002014马保州	董事,副总经理,总会计师	0		耿明斋	4002014耿明斋	独立董事	1	0	田土城	4002014田土城	独立董事	1	0	薛玉莲	4002014薛玉莲	独立董事	1	0		4002014	#N/A	0			4002014	#N/A	0			4002014	#N/A	0			4002014
400	2015	4002015	河南省	河南	河南2015	3.3322	0.016777	肖忠文	4002015肖忠文	董事	0		马保州	4002015马保州	董事,副总经理,总会计师	0		耿明斋	4002015耿明斋	独立董事	1	0	田土城	4002015田土城	独立董事	1	0	薛玉莲	4002015薛玉莲	独立董事	1	0		4002015	#N/A	0			4002015	#N/A	0			4002015	#N/A	0			4002015
400	2016	4002016	河南省	河南	河南2016	3.29584	0.0152979	翟新生	4002016翟新生	独立董事	1		肖忠文	4002016肖忠文	董事	0		张新昌	4002016张新昌	董事,总经理	0		尹项根	4002016尹项根	独立董事	1	0	王叙果	4002016王叙果	独立董事	1	0		4002016	#N/A	0			4002016	#N/A	0			4002016	#N/A	0			4002016
400	2017	4002017	河南省	河南	河南2017	3.4012	0.0197107	翟新生	4002017翟新生	独立董事	1		肖忠文	4002017肖忠文	董事	0		张新昌	4002017张新昌	监事会主席,董事	0		尹项根	4002017尹项根	独立董事	1	0	王叙果	4002017王叙果	独立董事	1	0		4002017	#N/A	0			4002017	#N/A	0			4002017	#N/A	0			4002017
400	2020	4002020	河南省	河南	河南2020	5.15329	0.020523	孙继强	4002020孙继强	董事	0		杜丹丹	4002020杜丹丹	非独立董事	0		尹项根	4002020尹项根	独立董事	1	0	翟新生	4002020翟新生	独立董事	1	0	王叙果	4002020王叙果	独立董事	1	0		4002020	#N/A	0			4002020	#N/A	0			4002020	#N/A	0			4002020
402	2020	4022020	北京市	北京	北京2020	2.3979	0.022133	杨小舟	4022020杨小舟	独立董事	1		牛俊杰	4022020牛俊杰	独立董事	1	0	吕洪斌	4022020吕洪斌	董事,总经理	0			4022020	#N/A	0			4022020	#N/A	0			4022020	#N/A	0			4022020	#N/A	0			4022020	#N/A	0			4022020
402	2022	4022022	北京市	北京	北京2022	7.92588	0.0163973	张巍	4022022张巍	独立董事	1		杨小舟	4022022杨小舟	独立董事	1	0		4022022	#N/A	0			4022022	#N/A	0			4022022	#N/A	0			4022022	#N/A	0			4022022	#N/A	0			4022022	#N/A	0			4022022
408	2014	4082014	山东省	山东	山东2014	3.97029	0.0191943	邵九林	4082014邵九林	独立董事	1		胡国强	4082014胡国强	独立董事	1	0	秦文平	4082014秦文平	副董事长	0			4082014	#N/A	0			4082014	#N/A	0			4082014	#N/A	0			4082014	#N/A	0			4082014	#N/A	0			4082014
408	2015	4082015	河北省	河北	河北2015	2.19722	0.0292826	邵九林	4082015邵九林	独立董事	1		胡国强	4082015胡国强	独立董事	1	0	秦文平	4082015秦文平	副董事长	0			4082015	#N/A	0			4082015	#N/A	0			4082015	#N/A	0			4082015	#N/A	0			4082015	#N/A	0			4082015
408	2017	4082017	青海省	青海	青海2017	0.693147	0.0266407	姚焕然	4082017姚焕然	独立董事	1		王卫国	4082017王卫国	独立董事	1	0	马福强	4082017马福强	董事	0			4082017	#N/A	0			4082017	#N/A	0			4082017	#N/A	0			4082017	#N/A	0			4082017	#N/A	0			4082017
409	2017	4092017	青海省	青海	青海2017	0.693147	0.0266407	王乐锦	4092017王乐锦	独立董事	1		王爱	4092017王爱	独立董事	1	0	林少一	4092017林少一	董事	0			4092017	#N/A	0			4092017	#N/A	0			4092017	#N/A	0			4092017	#N/A	0			4092017	#N/A	0			4092017
409	2019	4092019	青海省	青海	青海2019	1.09861	0.0289928	董华	4092019董华	独立董事	1		李兰明	4092019李兰明	独立董事	1	0	赵庆国	4092019赵庆国	副总经理,职工董事	0			4092019	#N/A	0			4092019	#N/A	0			4092019	#N/A	0			4092019	#N/A	0			4092019	#N/A	0			4092019
410	2023	4102023	青海省	青海	青海2023	7.86864	#N/A	徐永明	4102023徐永明	非独立董事,总经理	0		王英明	4102023王英明	独立董事	1	0	袁知柱	4102023袁知柱	独立董事	1	0		4102023	#N/A	0			4102023	#N/A	0			4102023	#N/A	0			4102023	#N/A	0			4102023	#N/A	0			4102023
413	2011	4132011	河北省	河北	河北2011	#N/A	0.0173327	张军浩	4132011张军浩	独立董事	1		周波	4132011周波	董事	0		韩志国	4132011韩志国	独立董事	1	0		4132011	#N/A	0			4132011	#N/A	0			4132011	#N/A	0			4132011	#N/A	0			4132011	#N/A	0			4132011
413	2014	4132014	河北省	河北	河北2014	0.693147	0.025686	张军浩	4132014张军浩	#N/A	0		周波	4132014周波	董事	0		韩志国	4132014韩志国	#N/A	0			4132014	#N/A	0			4132014	#N/A	0			4132014	#N/A	0			4132014	#N/A	0			4132014	#N/A	0			4132014
416	2010	4162010	新疆维吾尔自治区	新疆	新疆2010	#N/A	0.0149081	张新民	4162010张新民	独立董事	1		刘洪渭	4162010刘洪渭	独立董事	1	0	刘仲川	4162010刘仲川	独立董事	1	0	赵英伟	4162010赵英伟	监事会副主席,董事	0		陈良栋	4162010陈良栋	董事,财务总监	0			4162010	#N/A	0			4162010	#N/A	0			4162010	#N/A	0			4162010
418	2015	4182015	安徽省	安徽	安徽2015	1.60944	0.0166536	俞丽辉	4182015俞丽辉	独立董事	1		蒋青云	4182015蒋青云	独立董事	1	0	肖明光	4182015肖明光	董事	0			4182015	#N/A	0			4182015	#N/A	0			4182015	#N/A	0			4182015	#N/A	0			4182015	#N/A	0			4182015
419	2010	4192010	安徽省	安徽	安徽2010	0.693147	0.0148976	鲁应时	4192010鲁应时	独立董事	1		潘定衢	4192010潘定衢	独立董事	1	0	周兆达	4192010周兆达	董事长,总经理	0			4192010	#N/A	0			4192010	#N/A	0			4192010	#N/A	0			4192010	#N/A	0			4192010	#N/A	0			4192010
419	2012	4192012	安徽省	安徽	安徽2012	1.60944	0.0183712	鲁应时	4192012鲁应时	独立董事	1		潘定衢	4192012潘定衢	独立董事	1	0	周兆达	4192012周兆达	董事长,总经理	0			4192012	#N/A	0			4192012	#N/A	0			4192012	#N/A	0			4192012	#N/A	0			4192012	#N/A	0			4192012
420	2012	4202012	安徽省	安徽	安徽2012	1.60944	0.0183712	李万良	4202012李万良	独立董事	1		夏令敏	4202012夏令敏	独立董事	1	0	李光民	4202012李光民	独立董事	1	0		4202012	#N/A	0			4202012	#N/A	0			4202012	#N/A	0			4202012	#N/A	0			4202012	#N/A	0			4202012
420	2016	4202016	安徽省	安徽	安徽2016	3.2581	0.0221311	李万良	4202016李万良	#N/A	0		夏令敏	4202016夏令敏	#N/A	0			4202016	#N/A	0			4202016	#N/A	0			4202016	#N/A	0			4202016	#N/A	0			4202016	#N/A	0			4202016	#N/A	0			4202016
420	2018	4202018	安徽省	安徽	安徽2018	2.3979	0.0204296	李万良	4202018李万良	#N/A	0		夏令敏	4202018夏令敏	#N/A	0			4202018	#N/A	0			4202018	#N/A	0			4202018	#N/A	0			4202018	#N/A	0			4202018	#N/A	0			4202018	#N/A	0			4202018
420	2021	4202021	安徽省	安徽	安徽2021	9.33433	0.0165682	李万良	4202021李万良	#N/A	0		夏令敏	4202021夏令敏	#N/A	0		吕晓波	4202021吕晓波	独立董事	1	0	徐樑华	4202021徐樑华	独立董事	1	0		4202021	#N/A	0			4202021	#N/A	0			4202021	#N/A	0			4202021	#N/A	0			4202021
422	2017	4222017	湖北省	湖北	湖北2017	2.3979	0.021246	包晓岚	4222017包晓岚	#N/A	0		李齐放	4222017李齐放	#N/A	0			4222017	#N/A	0			4222017	#N/A	0			4222017	#N/A	0			4222017	#N/A	0			4222017	#N/A	0			4222017	#N/A	0			4222017
422	2020	4222020	湖北省	湖北	湖北2020	3.3673	0.0139769	吴伟荣	4222020吴伟荣	独立董事	1		张恬恬	4222020张恬恬	独立董事	1	0	张涛	4222020张涛	董事	0			4222020	#N/A	0			4222020	#N/A	0			4222020	#N/A	0			4222020	#N/A	0			4222020	#N/A	0			4222020
423	2012	4232012	山东省	山东	山东2012	0.693147	0.0142408	晁钢令	4232012晁钢令	#N/A	0		石庆瑞	4232012石庆瑞	#N/A	0		汪海	4232012汪海	#N/A	0		王积富	4232012王积富	#N/A	0		吴怀峰	4232012吴怀峰	董事,董事会秘书,副总裁	0		吴世农	4232012吴世农	#N/A	0			4232012	#N/A	0		谢胜喜	4232012谢胜喜	#N/A	0			4232012
423	2013	4232013	山东省	山东	山东2013	2.3979	0.0191595	晁钢令	4232013晁钢令	#N/A	0		石庆瑞	4232013石庆瑞	#N/A	0		汪海	4232013汪海	#N/A	0		王积富	4232013王积富	#N/A	0		吴怀峰	4232013吴怀峰	董事,董事会秘书,副总裁	0		吴世农	4232013吴世农	#N/A	0			4232013	#N/A	0		谢胜喜	4232013谢胜喜	#N/A	0			4232013
423	2015	4232015	山东省	山东	山东2015	4.15888	0.0157355	路清	4232015路清	独立董事	1		杜杰	4232015杜杰	独立董事	1	0	张炜	4232015张炜	独立董事	1	0	魏斌	4232015魏斌	董事	0		吴怀峰	4232015吴怀峰	董事,董事会秘书,副总裁	0			4232015	#N/A	0			4232015	#N/A	0			4232015	#N/A	0			4232015
423	2016	4232016	山东省	山东	山东2016	#N/A	0.0178275	路清	4232016路清	独立董事	1		杜杰	4232016杜杰	独立董事	1	0	张炜	4232016张炜	独立董事	1	0	魏斌	4232016魏斌	董事	0		吴怀峰	4232016吴怀峰	董事,董事会秘书,副总裁	0			4232016	#N/A	0			4232016	#N/A	0			4232016	#N/A	0			4232016
423	2023	4232023	山东省	山东	山东2023	9.13669	#N/A	文光伟	4232023文光伟	独立董事	1		果德安	4232023果德安	独立董事	1	0	翁菁雯	4232023翁菁雯	非独立董事	0		岳虎	4232023岳虎	非独立董事	0		张元兴	4232023张元兴	独立董事	1	0		4232023	#N/A	0			4232023	#N/A	0			4232023	#N/A	0			4232023
425	2018	4252018	江苏省	江苏	江苏2018	2.56495	0.0202007	林爱梅	4252018林爱梅	独立董事	1		周玮	4252018周玮	独立董事	1	0	秦悦民	4252018秦悦民	独立董事	1	0		4252018	#N/A	0			4252018	#N/A	0			4252018	#N/A	0			4252018	#N/A	0			4252018	#N/A	0			4252018
426	2010	4262010	江苏省	江苏	江苏2010	#N/A	0.0213009	龚兴隆	4262010龚兴隆	独立董事	1		寇显强	4262010寇显强	副董事长,董事会秘书	0		王欣新	4262010王欣新	#N/A	0			4262010	#N/A	0			4262010	#N/A	0			4262010	#N/A	0			4262010	#N/A	0			4262010	#N/A	0			4262010
428	2013	4282013	江苏省	江苏	江苏2013	#N/A	0.0259388	胡小龙	4282013胡小龙	独立董事	1		戴晓凤	4282013戴晓凤	独立董事	1	0	刘岳林	4282013刘岳林	董事	0			4282013	#N/A	0			4282013	#N/A	0			4282013	#N/A	0			4282013	#N/A	0			4282013	#N/A	0			4282013
429	2010	4292010	江苏省	江苏	江苏2010	#N/A	0.0213009	魏明海	4292010魏明海	独立董事	1		冯科	4292010冯科	独立董事	1	0	肖来久	4292010肖来久	董事,副总经理,总会计师	0			4292010	#N/A	0			4292010	#N/A	0			4292010	#N/A	0			4292010	#N/A	0			4292010	#N/A	0			4292010
429	2019	4292019	江苏省	江苏	江苏2019	3.2581	0.0197087	刘中华	4292019刘中华	独立董事	1		张华	4292019张华	独立董事	1	0	方智	4292019方智	董事,总会计师	0			4292019	#N/A	0			4292019	#N/A	0			4292019	#N/A	0			4292019	#N/A	0			4292019	#N/A	0			4292019
429	2020	4292020	江苏省	江苏	江苏2020	3.17805	0.0181944	刘中华	4292020刘中华	独立董事	1		张华	4292020张华	独立董事	1	0	方智	4292020方智	董事,总会计师	0			4292020	#N/A	0			4292020	#N/A	0			4292020	#N/A	0			4292020	#N/A	0			4292020	#N/A	0			4292020
429	2023	4292023	江苏省	江苏	江苏2023	9.39632	#N/A	刘中华	4292023刘中华	独立董事	1		陆明	4292023陆明	董事,总会计师	0		张华	4292023张华	独立董事	1	0		4292023	#N/A	0			4292023	#N/A	0			4292023	#N/A	0			4292023	#N/A	0			4292023	#N/A	0			4292023
430	2018	4302018	江苏省	江苏	江苏2018	2.56495	0.0202007	许长龙	4302018许长龙	独立董事	1		袁凌	4302018袁凌	独立董事	1	0	晏建军	4302018晏建军	非独立董事	0			4302018	#N/A	0			4302018	#N/A	0			4302018	#N/A	0			4302018	#N/A	0			4302018	#N/A	0			4302018
430	2019	4302019	江苏省	江苏	江苏2019	3.2581	0.0197087	许长龙	4302019许长龙	独立董事	1		袁凌	4302019袁凌	独立董事	1	0	晏建军	4302019晏建军	非独立董事	0			4302019	#N/A	0			4302019	#N/A	0			4302019	#N/A	0			4302019	#N/A	0			4302019	#N/A	0			4302019
430	2022	4302022	江苏省	江苏	江苏2022	9.38597	0.0208616	许长龙	4302022许长龙	独立董事	1		谷占亚	4302022谷占亚	非独立董事	0		袁凌	4302022袁凌	独立董事	1	0		4302022	#N/A	0			4302022	#N/A	0			4302022	#N/A	0			4302022	#N/A	0			4302022	#N/A	0			4302022
502	2010	5022010	湖北省	湖北	湖北2010	#N/A	0.0200518	吴英伟	5022010吴英伟	独立董事	1		毛炳强	5022010毛炳强	独立董事	1	0	林圣杰	5022010林圣杰	董事	0			5022010	#N/A	0			5022010	#N/A	0			5022010	#N/A	0			5022010	#N/A	0			5022010	#N/A	0			5022010
502	2012	5022012	湖北省	湖北	湖北2012	#N/A	0.019097	林圣杰	5022012林圣杰	董事	0		毛炳强	5022012毛炳强	独立董事	1	0	吴英伟	5022012吴英伟	独立董事	1	0		5022012	#N/A	0			5022012	#N/A	0			5022012	#N/A	0			5022012	#N/A	0			5022012	#N/A	0			5022012
502	2013	5022013	湖北省	湖北	湖北2013	0.693147	0.0141928	林圣杰	5022013林圣杰	董事	0		毛炳强	5022013毛炳强	独立董事	1	0	吴英伟	5022013吴英伟	独立董事	1	0		5022013	#N/A	0			5022013	#N/A	0			5022013	#N/A	0			5022013	#N/A	0			5022013	#N/A	0			5022013
502	2015	5022015	湖北省	湖北	湖北2015	1.79176	0.0190792	麦昊天	5022015麦昊天	独立董事	1		张在强	5022015张在强	独立董事	1	0	孙彦安	5022015孙彦安	董事	0			5022015	#N/A	0			5022015	#N/A	0			5022015	#N/A	0			5022015	#N/A	0			5022015	#N/A	0			5022015
502	2016	5022016	湖北省	湖北	湖北2016	2.70805	0.0187492	麦昊天	5022016麦昊天	独立董事	1		张在强	5022016张在强	独立董事	1	0	孙彦安	5022016孙彦安	董事	0			5022016	#N/A	0			5022016	#N/A	0			5022016	#N/A	0			5022016	#N/A	0			5022016	#N/A	0			5022016
502	2017	5022017	湖北省	湖北	湖北2017	2.3979	0.021246	麦昊天	5022017麦昊天	独立董事	1		张在强	5022017张在强	独立董事	1	0	孙彦安	5022017孙彦安	董事	0			5022017	#N/A	0			5022017	#N/A	0			5022017	#N/A	0			5022017	#N/A	0			5022017	#N/A	0			5022017
502	2019	5022019	湖北省	湖北	湖北2019	3.63759	0.0196924	刘远鹏	5022019刘远鹏	独立董事	1	1	薛自强	5022019薛自强	独立董事	1	0	林圣杰	5022019林圣杰	董事	0			5022019	#N/A	0			5022019	#N/A	0			5022019	#N/A	0			5022019	#N/A	0			5022019	#N/A	0			5022019
503	2010	5032010	海南省	海南	海南2010	#N/A	0.0195746	王中华	5032010王中华	独立董事	1		王光新	5032010王光新	独立董事	1	0	李旭	5032010李旭	董事,副总裁,财务负责人	0			5032010	#N/A	0			5032010	#N/A	0			5032010	#N/A	0			5032010	#N/A	0			5032010	#N/A	0			5032010
503	2012	5032012	海南省	海南	海南2012	#N/A	0.0139008	王中华	5032012王中华	独立董事	1		王光新	5032012王光新	独立董事	1	0	李旭	5032012李旭	董事,副总裁,财务负责人	0			5032012	#N/A	0			5032012	#N/A	0			5032012	#N/A	0			5032012	#N/A	0			5032012	#N/A	0			5032012
503	2016	5032016	海南省	海南	海南2016	1.38629	0.0220479	李协林	5032016李协林	独立董事	1		王培	5032016王培	独立董事	1	0	李旭	5032016李旭	董事,常务副总裁,财务负责人	0			5032016	#N/A	0			5032016	#N/A	0			5032016	#N/A	0			5032016	#N/A	0			5032016	#N/A	0			5032016
503	2018	5032018	海南省	海南	海南2018	5.04986	0.0227186	王秀丽	5032018王秀丽	独立董事	1		钱庆文	5032018钱庆文	独立董事	1	0	张灵	5032018张灵	非独立董事	0			5032018	#N/A	0			5032018	#N/A	0			5032018	#N/A	0			5032018	#N/A	0			5032018	#N/A	0			5032018
503	2019	5032019	海南省	海南	海南2019	4.80402	0.0182518	王秀丽	5032019王秀丽	独立董事	1		钱庆文	5032019钱庆文	独立董事	1	0	张灵	5032019张灵	非独立董事	0			5032019	#N/A	0			5032019	#N/A	0			5032019	#N/A	0			5032019	#N/A	0			5032019	#N/A	0			5032019
504	2015	5042015	山东省	山东	山东2015	4.15888	0.0157355	王强	5042015王强	独立董事	1		王咏梅	5042015王咏梅	独立董事	1	0	胡小龙	5042015胡小龙	非独立董事	0			5042015	#N/A	0			5042015	#N/A	0			5042015	#N/A	0			5042015	#N/A	0			5042015	#N/A	0			5042015
504	2023	5042023	山东省	山东	山东2023	9.13669	#N/A	醋卫华	5042023醋卫华	独立董事	1		杨云	5042023杨云	董事长,非独立董事	0		赵亚青	5042023赵亚青	独立董事	1	0		5042023	#N/A	0			5042023	#N/A	0			5042023	#N/A	0			5042023	#N/A	0			5042023	#N/A	0			5042023
507	2010	5072010	山东省	山东	山东2010	#N/A	0.0142992	崔松宁	5072010崔松宁	独立董事	1		王继宁	5072010王继宁	独立董事	1	0	王健	5072010王健	独立董事	1	0		5072010	#N/A	0			5072010	#N/A	0			5072010	#N/A	0			5072010	#N/A	0			5072010	#N/A	0			5072010
507	2011	5072011	山东省	山东	山东2011	#N/A	0.0214811	崔松宁	5072011崔松宁	独立董事	1		王继宁	5072011王继宁	独立董事	1	0	王健	5072011王健	独立董事	1	0		5072011	#N/A	0			5072011	#N/A	0			5072011	#N/A	0			5072011	#N/A	0			5072011	#N/A	0			5072011
507	2012	5072012	山东省	山东	山东2012	0.693147	0.0142408	葛芸	5072012葛芸	独立董事	1		王树勤	5072012王树勤	独立董事	1	0	王继宁	5072012王继宁	独立董事	1	0		5072012	#N/A	0			5072012	#N/A	0			5072012	#N/A	0			5072012	#N/A	0			5072012	#N/A	0			5072012
507	2013	5072013	山东省	山东	山东2013	2.3979	0.0191595	葛芸	5072013葛芸	独立董事	1		王树勤	5072013王树勤	独立董事	1	0	王继宁	5072013王继宁	独立董事	1	0		5072013	#N/A	0			5072013	#N/A	0			5072013	#N/A	0			5072013	#N/A	0			5072013	#N/A	0			5072013
509	2013	5092013	广东省	广东	广东2013	#N/A	0.0237707	柴磊	5092013柴磊	独立董事	1		王友亭	5092013王友亭	独立董事	1	0	王苏	5092013王苏	#N/A	0			5092013	#N/A	0			5092013	#N/A	0			5092013	#N/A	0			5092013	#N/A	0			5092013	#N/A	0			5092013
509	2014	5092014	广东省	广东	广东2014	#N/A	0.0224623	鄢国祥	5092014鄢国祥	独立董事	1		钟卫	5092014钟卫	独立董事	1	0	石纪灯	5092014石纪灯	非独立董事	0			5092014	#N/A	0			5092014	#N/A	0			5092014	#N/A	0			5092014	#N/A	0			5092014	#N/A	0			5092014
509	2016	5092016	广东省	广东	广东2016	1.94591	0.0237664	鄢国祥	5092016鄢国祥	独立董事	1		钟卫	5092016钟卫	独立董事	1	0	石纪灯	5092016石纪灯	非独立董事	0			5092016	#N/A	0			5092016	#N/A	0			5092016	#N/A	0			5092016	#N/A	0			5092016	#N/A	0			5092016
509	2017	5092017	广东省	广东	广东2017	2.70805	0.0163228	吴奕中	5092017吴奕中	非独立董事,总经理	0		孙剑非	5092017孙剑非	独立董事	1	0	张新	5092017张新	独立董事	1	0		5092017	#N/A	0			5092017	#N/A	0			5092017	#N/A	0			5092017	#N/A	0			5092017	#N/A	0			5092017
509	2018	5092018	广东省	广东	广东2018	2.56495	0.0175543	吴奕中	5092018吴奕中	非独立董事,总经理	0		孙剑非	5092018孙剑非	独立董事	1	0	张新	5092018张新	独立董事	1	0		5092018	#N/A	0			5092018	#N/A	0			5092018	#N/A	0			5092018	#N/A	0			5092018	#N/A	0			5092018
509	2019	5092019	广东省	广东	广东2019	2.77259	0.0140111	吴奕中	5092019吴奕中	非独立董事,总经理	0		孙剑非	5092019孙剑非	独立董事	1	1	张新	5092019张新	独立董事	1	0		5092019	#N/A	0			5092019	#N/A	0			5092019	#N/A	0			5092019	#N/A	0			5092019	#N/A	0			5092019
509	2020	5092020	广东省	广东	广东2020	2.83321	0.0174561	李备战	5092020李备战	独立董事	1		文红星	5092020文红星	独立董事	1	0	吴奕中	5092020吴奕中	董事长,非独立董事,总经理	1	0		5092020	#N/A	0			5092020	#N/A	0			5092020	#N/A	0			5092020	#N/A	0			5092020	#N/A	0			5092020
510	2010	5102010	广东省	广东	广东2010	#N/A	0.0216352	李优树	5102010李优树	独立董事	1	1	刘镝	5102010刘镝	董事	0		张奉军	5102010张奉军	独立董事	1	0		5102010	#N/A	0			5102010	#N/A	0			5102010	#N/A	0			5102010	#N/A	0			5102010	#N/A	0			5102010
510	2011	5102011	广东省	广东	广东2011	#N/A	0.0199093	牟文	5102011牟文	独立董事	1		李优树	5102011李优树	独立董事	1	0	刘镝	5102011刘镝	董事	0		彭朗	5102011彭朗	董事,副总裁	0		谭微	5102011谭微	董事	0			5102011	#N/A	0			5102011	#N/A	0			5102011	#N/A	0			5102011
510	2012	5102012	广东省	广东	广东2012	0.693147	0.0230561	牟文	5102012牟文	独立董事	1		李优树	5102012李优树	独立董事	1	1	刘镝	5102012刘镝	董事	0		彭朗	5102012彭朗	董事,副总裁	0		谭微	5102012谭微	董事	0			5102012	#N/A	0			5102012	#N/A	0			5102012	#N/A	0			5102012
510	2017	5102017	广东省	广东	广东2017	2.70805	0.0163228	张奉军	5102017张奉军	独立董事	1		张宗俊	5102017张宗俊	独立董事	1	0	董剑锋	5102017董剑锋	董事	0		李刚剑	5102017李刚剑	董事	0			5102017	#N/A	0			5102017	#N/A	0			5102017	#N/A	0			5102017	#N/A	0			5102017
510	2018	5102018	广东省	广东	广东2018	2.56495	0.0175543	张奉军	5102018张奉军	独立董事	1		张宗俊	5102018张宗俊	独立董事	1	0	董剑锋	5102018董剑锋	董事	0		李刚剑	5102018李刚剑	董事	0			5102018	#N/A	0			5102018	#N/A	0			5102018	#N/A	0			5102018	#N/A	0			5102018
510	2020	5102020	广东省	广东	广东2020	2.83321	0.0174561	董剑锋	5102020董剑锋	董事	0		叶玉盛	5102020叶玉盛	独立董事	1	0	张奉军	5102020张奉军	独立董事	1	0	彭朗	5102020彭朗	董事,总裁	0		张宗俊	5102020张宗俊	独立董事	1	0		5102020	#N/A	0			5102020	#N/A	0			5102020	#N/A	0			5102020
513	2017	5132017	广东省	广东	广东2017	2.70805	0.0163228	徐焱军	5132017徐焱军	独立非执行董事	1		郭国庆	5132017郭国庆	独立董事	1	0	谢耘	5132017谢耘	独立非执行董事	1	0		5132017	#N/A	0			5132017	#N/A	0			5132017	#N/A	0			5132017	#N/A	0			5132017	#N/A	0			5132017
513	2018	5132018	广东省	广东	广东2018	2.56495	0.0175543	徐焱军	5132018徐焱军	独立非执行董事	1		郭国庆	5132018郭国庆	独立董事	1	0	谢耘	5132018谢耘	独立非执行董事	1	0		5132018	#N/A	0			5132018	#N/A	0			5132018	#N/A	0			5132018	#N/A	0			5132018	#N/A	0			5132018
517	2011	5172011	浙江省	浙江	浙江2011	#N/A	0.0219653	沈成德	5172011沈成德	独立董事	1		贾生华	5172011贾生华	独立董事	1	0	俞康麒	5172011俞康麒	董事,副总经理	0			5172011	#N/A	0			5172011	#N/A	0			5172011	#N/A	0			5172011	#N/A	0			5172011	#N/A	0			5172011
517	2020	5172020	浙江省	浙江	浙江2020	4.26268	0.0131053	杨华军	5172020杨华军	独立董事	1		俞康麒	5172020俞康麒	董事,副总经理	0		郭站红	5172020郭站红	独立董事	1	0		5172020	#N/A	0			5172020	#N/A	0			5172020	#N/A	0			5172020	#N/A	0			5172020	#N/A	0			5172020
517	2023	5172023	浙江省	浙江	浙江2023	9.74326	#N/A	杨华军	5172023杨华军	独立董事	1		闫国庆	5172023闫国庆	独立董事	1	0	俞康麒	5172023俞康麒	董事,副总经理	0			5172023	#N/A	0			5172023	#N/A	0			5172023	#N/A	0			5172023	#N/A	0			5172023	#N/A	0			5172023
518	2012	5182012	浙江省	浙江	浙江2012	#N/A	0.019422	徐小娟	5182012徐小娟	独立董事	1		卢青	5182012卢青	独立董事	1	0	孙国建	5182012孙国建	董事长,总经理	0			5182012	#N/A	0			5182012	#N/A	0			5182012	#N/A	0			5182012	#N/A	0			5182012	#N/A	0			5182012
518	2013	5182013	浙江省	浙江	浙江2013	#N/A	0.0203306	徐小娟	5182013徐小娟	独立董事	1		卢青	5182013卢青	独立董事	1	0	孙国建	5182013孙国建	董事长,总经理	0			5182013	#N/A	0			5182013	#N/A	0			5182013	#N/A	0			5182013	#N/A	0			5182013	#N/A	0			5182013
518	2017	5182017	浙江省	浙江	浙江2017	1.09861	0.0181469	沈晓军	5182017沈晓军	独立董事	1		马丽英	5182017马丽英	独立董事	1	0	孙国建	5182017孙国建	董事长,总经理	0			5182017	#N/A	0			5182017	#N/A	0			5182017	#N/A	0			5182017	#N/A	0			5182017	#N/A	0			5182017
518	2018	5182018	浙江省	浙江	浙江2018	1.79176	0.0193728	沈晓军	5182018沈晓军	独立董事	1		马丽英	5182018马丽英	独立董事	1	0	孙国建	5182018孙国建	董事长,总经理	0			5182018	#N/A	0			5182018	#N/A	0			5182018	#N/A	0			5182018	#N/A	0			5182018	#N/A	0			5182018
518	2020	5182020	浙江省	浙江	浙江2020	4.26268	0.0131053	刘卫	5182020刘卫	独立董事	1		郭煜	5182020郭煜	董事长,总经理	0		徐小娟	5182020徐小娟	独立董事	1	0		5182020	#N/A	0			5182020	#N/A	0			5182020	#N/A	0			5182020	#N/A	0			5182020	#N/A	0			5182020
519	2019	5192019	湖南省	湖南	湖南2019	5.95584	0.0183731	董敏	5192019董敏	独立董事	1		韩赤风	5192019韩赤风	独立董事	1	0	李玉顺	5192019李玉顺	非独立董事,副总经理	0			5192019	#N/A	0			5192019	#N/A	0			5192019	#N/A	0			5192019	#N/A	0			5192019	#N/A	0			5192019
519	2023	5192023	湖南省	湖南	湖南2023	9.98898	#N/A	鲁委	5192023鲁委	独立董事	1		魏军	5192023魏军	非独立董事,董事长,党委书记	0		董敏	5192023董敏	独立董事	1	0		5192023	#N/A	0			5192023	#N/A	0			5192023	#N/A	0			5192023	#N/A	0			5192023	#N/A	0			5192023
520	2011	5202011	湖南省	湖南	湖南2011	0.693147	0.0209581		5202011	#N/A	0			5202011	#N/A	0			5202011	#N/A	0			5202011	#N/A	0			5202011	#N/A	0			5202011	#N/A	0			5202011	#N/A	0			5202011	#N/A	0			5202011
520	2015	5202015	湖南省	湖南	湖南2015	1.09861	0.0212538	茅宁	5202015茅宁	独立董事	1		邓明然	5202015邓明然	独立董事	1	0	刘志伟	5202015刘志伟	总会计师,董事	0			5202015	#N/A	0			5202015	#N/A	0			5202015	#N/A	0			5202015	#N/A	0			5202015	#N/A	0			5202015
524	2016	5242016	湖南省	湖南	湖南2016	2.3979	0.0200848	卫建国	5242016卫建国	独立董事	1		郑定全	5242016郑定全	董事,副总经理,董事会秘书	0		李新春	5242016李新春	独立董事	1	0		5242016	#N/A	0			5242016	#N/A	0			5242016	#N/A	0			5242016	#N/A	0			5242016	#N/A	0			5242016
524	2020	5242020	湖南省	湖南	湖南2020	6.28227	0.0176416	郑定全	5242020郑定全	董事,副总经理,董事会秘书	0		唐清泉	5242020唐清泉	独立董事	1	0	吴向能	5242020吴向能	独立董事	1	0		5242020	#N/A	0			5242020	#N/A	0			5242020	#N/A	0			5242020	#N/A	0			5242020	#N/A	0			5242020
526	2012	5262012	江苏省	江苏	江苏2012	#N/A	0.0197756	唐安	5262012唐安	独立董事	1		雷星晖	5262012雷星晖	独立董事	1	0	吴崇林	5262012吴崇林	董事,总经理	0			5262012	#N/A	0			5262012	#N/A	0			5262012	#N/A	0			5262012	#N/A	0			5262012	#N/A	0			5262012
526	2019	5262019	江苏省	江苏	江苏2019	3.2581	0.0197087	王震	5262019王震	独立董事	1		李元旭	5262019李元旭	独立董事	1	0	郑铂	5262019郑铂	董事	0			5262019	#N/A	0			5262019	#N/A	0			5262019	#N/A	0			5262019	#N/A	0			5262019	#N/A	0			5262019
526	2022	5262022	江苏省	江苏	江苏2022	9.38597	0.0208616	王震	5262022王震	独立董事	1		Zhang Yun	5262022Zhang Yun	独立董事	1	0	吴胜武	5262022吴胜武	董事长	0			5262022	#N/A	0			5262022	#N/A	0			5262022	#N/A	0			5262022	#N/A	0			5262022	#N/A	0			5262022
528	2011	5282011	广西壮族自治区	广西	广西2011	0.693147	0.0240202	李嘉明	5282011李嘉明	独立董事	1		冯宝珊	5282011冯宝珊	独立董事	1	0	贺瑛	5282011贺瑛	独立董事	1	0	杨一川	5282011杨一川	董事	0		苏子孟	5282011苏子孟	外部董事	0			5282011	#N/A	0			5282011	#N/A	0			5282011	#N/A	0			5282011
528	2018	5282018	广西壮族自治区	广西	广西2018	3.17805	0.016389	刘斌	5282018刘斌	独立董事	1		俞传芬	5282018俞传芬	副董事长	0		苏子孟	5282018苏子孟	外部董事	0		韩立岩	5282018韩立岩	独立董事	1	0	郑毓煌	5282018郑毓煌	独立董事	1	0		5282018	#N/A	0			5282018	#N/A	0			5282018	#N/A	0			5282018
529	2017	5292017	广西壮族自治区	广西	广西2017	2.48491	0.0176567	罗其安	5292017罗其安	独立董事	1		朱列玉	5292017朱列玉	独立董事	1	0	郑国坚	5292017郑国坚	独立董事	1	0	陈子召	5292017陈子召	董事,总经理	0		陈楚盛	5292017陈楚盛	董事	0			5292017	#N/A	0			5292017	#N/A	0			5292017	#N/A	0			5292017
529	2022	5292022	广西壮族自治区	广西	广西2022	8.30672	0.0153993	胡志勇	5292022胡志勇	独立董事	1	1	郭天武	5292022郭天武	独立董事	1	0	李胜兰	5292022李胜兰	独立董事	1	1	缪安民	5292022缪安民	董事,总经理,财务负责人	0		夏斌	5292022夏斌	董事,副总经理,财务负责人	0			5292022	#N/A	0			5292022	#N/A	0			5292022	#N/A	0			5292022
530	2013	5302013	辽宁省	辽宁	辽宁2013	#N/A	0.0219805	肖永勤	5302013肖永勤	董事长	0		刘凯	5302013刘凯	董事,总经理	0		王会全	5302013王会全	独立董事	1	0	邢天才	5302013邢天才	独立董事	1	0	刘彩萍	5302013刘彩萍	独立董事	1	0		5302013	#N/A	0			5302013	#N/A	0			5302013	#N/A	0			5302013
530	2014	5302014	辽宁省	辽宁	辽宁2014	#N/A	0.0178731	纪志坚	5302014纪志坚	董事长	0		徐郡饶	5302014徐郡饶	董事	0		王会全	5302014王会全	独立董事	1	0	邢天才	5302014邢天才	独立董事	1	0	刘彩萍	5302014刘彩萍	独立董事	1	0		5302014	#N/A	0			5302014	#N/A	0			5302014	#N/A	0			5302014
531	2012	5312012	辽宁省	辽宁	辽宁2012	#N/A	0.0150034	王世定	5312012王世定	独立董事	1		陈永宏	5312012陈永宏	独立董事	1	0	杨舜贤	5312012杨舜贤	董事,副总经理	0			5312012	#N/A	0			5312012	#N/A	0			5312012	#N/A	0			5312012	#N/A	0			5312012	#N/A	0			5312012
534	2018	5342018	辽宁省	辽宁	辽宁2018	1.60944	0.0153085	张汉斌	5342018张汉斌	独立董事	1		陈伟岳	5342018陈伟岳	独立董事	1	0	王苏生	5342018王苏生	独立董事	1	0	黄振光	5342018黄振光	董事长,总经理	0		毕天晓	5342018毕天晓	董事,总经理	0			5342018	#N/A	0			5342018	#N/A	0			5342018	#N/A	0			5342018
536	2011	5362011	福建省	福建	福建2011	0.693147	0.0172949	薛爱国	5362011薛爱国	独立董事	1		许萍	5362011许萍	独立董事	1	0	黄克安	5362011黄克安	独立董事	1	0	童建炫	5362011童建炫	独立董事	1	0	王忠兴	5362011王忠兴	董事,总经理	0			5362011	#N/A	0			5362011	#N/A	0			5362011	#N/A	0			5362011
536	2022	5362022	福建省	福建	福建2022	8.42858	0.0129832	许萍	5362022许萍	独立董事	1		林俊	5362022林俊	董事长	0		王志强	5362022王志强	独立董事	1	0		5362022	#N/A	0			5362022	#N/A	0			5362022	#N/A	0			5362022	#N/A	0			5362022	#N/A	0			5362022
537	2012	5372012	福建省	福建	福建2012	#N/A	0.0174656	田昆如	5372012田昆如	独立董事	1		宋英杰	5372012宋英杰	副总经理,财务总监	0		马兆祥	5372012马兆祥	董事	0		冯科	5372012冯科	独立董事	1	0	宁维武	5372012宁维武	独立董事	1	0		5372012	#N/A	0			5372012	#N/A	0			5372012	#N/A	0			5372012
537	2013	5372013	福建省	福建	福建2013	#N/A	0.0214459	田昆如	5372013田昆如	独立董事	1		周悦刚	5372013周悦刚	董事	0		马兆祥	5372013马兆祥	董事	0		冯科	5372013冯科	独立董事	1	0	宁维武	5372013宁维武	独立董事	1	0		5372013	#N/A	0			5372013	#N/A	0			5372013	#N/A	0			5372013
538	2010	5382010	云南省	云南	云南2010	#N/A	0.0145235	曲晓辉	5382010曲晓辉	独立董事	1		项兵	5382010项兵	独立董事	1	0	陈德贤	5382010陈德贤	董事	0			5382010	#N/A	0			5382010	#N/A	0			5382010	#N/A	0			5382010	#N/A	0			5382010	#N/A	0			5382010
541	2010	5412010	广东省	广东	广东2010	#N/A	0.0216352	刘振平	5412010刘振平	独立董事	1		张海霞	5412010张海霞	独立董事	1	0	窦林平	5412010窦林平	独立董事	1	0	潘达礼	5412010潘达礼	董事	0		泰勒	5412010泰勒	董事	0			5412010	#N/A	0			5412010	#N/A	0			5412010	#N/A	0			5412010
541	2012	5412012	广东省	广东	广东2012	0.693147	0.0230561	刘振平	5412012刘振平	独立董事	1		张海霞	5412012张海霞	独立董事	1	0	窦林平	5412012窦林平	独立董事	1	0	潘达礼	5412012潘达礼	董事	0		泰勒	5412012泰勒	董事	0			5412012	#N/A	0			5412012	#N/A	0			5412012	#N/A	0			5412012
543	2023	5432023	安徽省	安徽	安徽2023	9.15578	#N/A	姚王信	5432023姚王信	独立董事	1		方世清	5432023方世清	董事,总经理	0		谢敬东	5432023谢敬东	独立董事	1	0		5432023	#N/A	0			5432023	#N/A	0			5432023	#N/A	0			5432023	#N/A	0			5432023	#N/A	0			5432023
544	2011	5442011	安徽省	安徽	安徽2011	0.693147	0.0177839	李伟真	5442011李伟真	独立董事	1		李建平	5442011李建平	董事长,总经理,董事	0		周翠玲	5442011周翠玲	董事	0		尹效华	5442011尹效华	独立董事	1	0	董家春	5442011董家春	独立董事	1	0		5442011	#N/A	0			5442011	#N/A	0			5442011	#N/A	0			5442011
544	2012	5442012	安徽省	安徽	安徽2012	1.60944	0.0183712	李伟真	5442012李伟真	独立董事	1		李建平	5442012李建平	董事长,总经理,党委书记,董事	0		周翠玲	5442012周翠玲	董事	0		尹效华	5442012尹效华	独立董事	1	0	董家春	5442012董家春	独立董事	1	0		5442012	#N/A	0			5442012	#N/A	0			5442012	#N/A	0			5442012
544	2013	5442013	安徽省	安徽	安徽2013	0.693147	0.0172233	李伟真	5442013李伟真	独立董事	1		李建平	5442013李建平	董事长,总经理,党委书记,董事,董事会秘书(代理)	0		周翠玲	5442013周翠玲	董事	0		尹效华	5442013尹效华	独立董事	1	0	董家春	5442013董家春	独立董事	1	0		5442013	#N/A	0			5442013	#N/A	0			5442013	#N/A	0			5442013
544	2017	5442017	安徽省	安徽	安徽2017	3.43399	0.0173611	吴跃平	5442017吴跃平	独立董事	1	1	李建平	5442017李建平	董事长,总经理,党委书记,董事,董事会秘书(代理)	0		张云润	5442017张云润	董事	0		路运锋	5442017路运锋	独立董事	1	0	叶树华	5442017叶树华	独立董事	1	0		5442017	#N/A	0			5442017	#N/A	0			5442017	#N/A	0			5442017
545	2010	5452010	安徽省	安徽	安徽2010	0.693147	0.0148976	罗绍德	5452010罗绍德	独立董事	1		孔小文	5452010孔小文	独立董事	1	0	赵友永	5452010赵友永	董事长	0			5452010	#N/A	0			5452010	#N/A	0			5452010	#N/A	0			5452010	#N/A	0			5452010	#N/A	0			5452010
545	2011	5452011	安徽省	安徽	安徽2011	0.693147	0.0177839	罗绍德	5452011罗绍德	独立董事	1		孔小文	5452011孔小文	独立董事	1	0	赵友永	5452011赵友永	董事长	0			5452011	#N/A	0			5452011	#N/A	0			5452011	#N/A	0			5452011	#N/A	0			5452011	#N/A	0			5452011
545	2012	5452012	安徽省	安徽	安徽2012	1.60944	0.0183712	罗绍德	5452012罗绍德	独立董事	1		孔小文	5452012孔小文	独立董事	1	0	赵友永	5452012赵友永	董事长	0			5452012	#N/A	0			5452012	#N/A	0			5452012	#N/A	0			5452012	#N/A	0			5452012	#N/A	0			5452012
546	2018	5462018	安徽省	安徽	安徽2018	2.3979	0.0204296	俞乐平	5462018俞乐平	独立董事	1		李政辉	5462018李政辉	独立董事	1	0	吴仲时	5462018吴仲时	董事	0			5462018	#N/A	0			5462018	#N/A	0			5462018	#N/A	0			5462018	#N/A	0			5462018	#N/A	0			5462018
547	2019	5472019	福建省	福建	福建2019	3.13549	0.0220985	杨雄	5472019杨雄	独立董事	1		王文海	5472019王文海	董事,总经理	0		周明	5472019周明	董事,副总经理	0		马玲	5472019马玲	独立董事	1	0	胡俞越	5472019胡俞越	独立董事	1	0		5472019	#N/A	0			5472019	#N/A	0			5472019	#N/A	0			5472019
547	2022	5472022	福建省	福建	福建2022	8.42858	0.0129832	叶树理	5472022叶树理	独立董事	1		杨松令	5472022杨松令	独立董事	1	0	胡庆荣	5472022胡庆荣	董事长,董事,总经理	0		梁东宇	5472022梁东宇	总经理,董事	0		胡俞越	5472022胡俞越	独立董事	1	0		5472022	#N/A	0			5472022	#N/A	0			5472022	#N/A	0			5472022
547	2023	5472023	福建省	福建	福建2023	8.43229	#N/A	胡庆荣	5472023胡庆荣	董事长,董事	0		胡俞越	5472023胡俞越	独立董事	1	0	杨松令	5472023杨松令	独立董事	1	0	叶树理	5472023叶树理	独立董事	1	0	梁东宇	5472023梁东宇	总经理,董事	0			5472023	#N/A	0			5472023	#N/A	0			5472023	#N/A	0			5472023
550	2023	5502023	江西省	江西	江西2023	9.23034	#N/A	袁明学	5502023袁明学	董事	0		王悦	5502023王悦	独立董事	1	0	陈江峰	5502023陈江峰	独立董事	1	0	Ryan Anderson	5502023Ryan Anderson	董事	0		朱浏俊	5502023朱浏俊	财务总监	0		余卓平	5502023余卓平	独立董事	1	1		5502023	#N/A	0			5502023	#N/A	0			5502023
552	2016	5522016	甘肃省	甘肃	甘肃2016	1.38629	0.0219519	曹斌	5522016曹斌	独立董事	1		刘永翀	5522016刘永翀	董事	0		马海龙	5522016马海龙	董事,总经理	0		陈顺林	5522016陈顺林	独立董事	1	0	王恩丽	5522016王恩丽	独立董事	1	0		5522016	#N/A	0			5522016	#N/A	0			5522016	#N/A	0			5522016
552	2021	5522021	甘肃省	甘肃	甘肃2021	8.47533	0.0232926	周一虹	5522021周一虹	独立董事	1	1	王文建	5522021王文建	董事	0		林胜	5522021林胜	董事,总经理	0		庞国强	5522021庞国强	独立董事	1	0	魏彦珩	5522021魏彦珩	独立董事	1	0		5522021	#N/A	0			5522021	#N/A	0			5522021	#N/A	0			5522021
553	2013	5532013	甘肃省	甘肃	甘肃2013	#N/A	0.0224337	张慧德	5532013张慧德	独立董事	1		黎晖	5532013黎晖	#N/A	0		何学松	5532013何学松	董事,财务总监	0			5532013	#N/A	0			5532013	#N/A	0			5532013	#N/A	0			5532013	#N/A	0			5532013	#N/A	0			5532013
553	2014	5532014	甘肃省	甘肃	甘肃2014	#N/A	0.0206524	张慧德	5532014张慧德	独立董事	1		黎晖	5532014黎晖	#N/A	0		何学松	5532014何学松	董事,财务总监	0			5532014	#N/A	0			5532014	#N/A	0			5532014	#N/A	0			5532014	#N/A	0			5532014	#N/A	0			5532014
553	2016	5532016	湖北省	湖北	湖北2016	2.70805	0.0187492	张慧德	5532016张慧德	独立董事	1		佘志莉	5532016佘志莉	非独立董事	0		艾秋红	5532016艾秋红	独立董事	1	0		5532016	#N/A	0			5532016	#N/A	0			5532016	#N/A	0			5532016	#N/A	0			5532016	#N/A	0			5532016
554	2017	5542017	湖北省	湖北	湖北2017	2.3979	0.021246	王忠峰	5542017王忠峰	董事	0		王月永	5542017王月永	独立董事	1	0	刘海英	5542017刘海英	独立董事	1	0		5542017	#N/A	0			5542017	#N/A	0			5542017	#N/A	0			5542017	#N/A	0			5542017	#N/A	0			5542017
554	2018	5542018	湖北省	湖北	湖北2018	3.61092	0.0218442	王忠峰	5542018王忠峰	董事	0		王月永	5542018王月永	独立董事	1	0	刘海英	5542018刘海英	独立董事	1	0		5542018	#N/A	0			5542018	#N/A	0			5542018	#N/A	0			5542018	#N/A	0			5542018	#N/A	0			5542018
554	2019	5542019	湖北省	湖北	湖北2019	3.63759	0.0196924	王忠峰	5542019王忠峰	董事	0		王月永	5542019王月永	独立董事	1	0	刘海英	5542019刘海英	独立董事	1	0		5542019	#N/A	0			5542019	#N/A	0			5542019	#N/A	0			5542019	#N/A	0			5542019	#N/A	0			5542019
555	2016	5552016	广东省	广东	广东2016	1.94591	0.0237664	罗振邦	5552016罗振邦	独立董事	1		王能光	5552016王能光	独立董事	1	0	林杨	5552016林杨	副董事长	0			5552016	#N/A	0			5552016	#N/A	0			5552016	#N/A	0			5552016	#N/A	0			5552016	#N/A	0			5552016
555	2017	5552017	广东省	广东	广东2017	2.70805	0.0163228	罗振邦	5552017罗振邦	独立董事	1		王能光	5552017王能光	独立董事	1	0	林杨	5552017林杨	副董事长	0			5552017	#N/A	0			5552017	#N/A	0			5552017	#N/A	0			5552017	#N/A	0			5552017	#N/A	0			5552017
557	2012	5572012	广东省	广东	广东2012	0.693147	0.0230561	张文君	5572012张文君	独立董事	1		段喜民	5572012段喜民	董事	0		袁晓玲	5572012袁晓玲	独立董事	1	0		5572012	#N/A	0			5572012	#N/A	0			5572012	#N/A	0			5572012	#N/A	0			5572012	#N/A	0			5572012
557	2022	5572022	广东省	广东	广东2022	9.96857	0.0155058	张文君	5572022张文君	独立董事	1		吴春芳	5572022吴春芳	独立董事	1	1	尤军	5572022尤军	董事	0			5572022	#N/A	0			5572022	#N/A	0			5572022	#N/A	0			5572022	#N/A	0			5572022	#N/A	0			5572022
559	2017	5592017	浙江省	浙江	浙江2017	1.09861	0.0181469	邬崇国	5592017邬崇国	独立董事	1		张守国	5592017张守国	#N/A	0		傅立群	5592017傅立群	独立董事	1	0	顾福祥	5592017顾福祥	董事,副总经理	0			5592017	#N/A	0			5592017	#N/A	0			5592017	#N/A	0			5592017	#N/A	0			5592017
559	2018	5592018	浙江省	浙江	浙江2018	1.79176	0.0193728	邬崇国	5592018邬崇国	独立董事	1		张守国	5592018张守国	#N/A	0		傅立群	5592018傅立群	独立董事	1	0	顾福祥	5592018顾福祥	董事,副总经理	0			5592018	#N/A	0			5592018	#N/A	0			5592018	#N/A	0			5592018	#N/A	0			5592018
559	2019	5592019	浙江省	浙江	浙江2019	4.81218	0.0120027	邬崇国	5592019邬崇国	独立董事	1		张守国	5592019张守国	#N/A	0		傅立群	5592019傅立群	独立董事	1	0	顾福祥	5592019顾福祥	副总经理,董事	0			5592019	#N/A	0			5592019	#N/A	0			5592019	#N/A	0			5592019	#N/A	0			5592019
559	2020	5592020	浙江省	浙江	浙江2020	4.26268	0.0131053	邬崇国	5592020邬崇国	独立董事	1		傅立群	5592020傅立群	独立董事	1	0	管大源	5592020管大源	董事长,财务负责人	0		许小建	5592020许小建	非独立董事,董事会秘书,监事会主席	0			5592020	#N/A	0			5592020	#N/A	0			5592020	#N/A	0			5592020	#N/A	0			5592020
561	2016	5612016	浙江省	浙江	浙江2016	1.09861	0.026311	张俊瑞	5612016张俊瑞	独立董事	1		廖良汉	5612016廖良汉	独立董事	1	0	赵兰平	5612016赵兰平	董事,副总经理	0			5612016	#N/A	0			5612016	#N/A	0			5612016	#N/A	0			5612016	#N/A	0			5612016	#N/A	0			5612016
561	2017	5612017	浙江省	浙江	浙江2017	1.09861	0.0181469	张俊瑞	5612017张俊瑞	独立董事	1		廖良汉	5612017廖良汉	独立董事	1	0	赵兰平	5612017赵兰平	董事,副总经理,董事会秘书(代理)	0			5612017	#N/A	0			5612017	#N/A	0			5612017	#N/A	0			5612017	#N/A	0			5612017	#N/A	0			5612017
564	2010	5642010	陕西省	陕西	陕西2010	0.693147	0.0211651	胡东山	5642010胡东山	独立董事	1		马永庆	5642010马永庆	董事长	0		马超	5642010马超	副董事长,总裁	0		强力	5642010强力	独立董事	1	0	周宝成	5642010周宝成	独立董事	1	0		5642010	#N/A	0			5642010	#N/A	0			5642010	#N/A	0			5642010
564	2011	5642011	陕西省	陕西	陕西2011	1.38629	0.0187523	武晓玲	5642011武晓玲	独立董事	1		马永庆	5642011马永庆	董事长	0		马超	5642011马超	副董事长,总裁	0		强力	5642011强力	独立董事	1	0	周宝成	5642011周宝成	独立董事	1	0		5642011	#N/A	0			5642011	#N/A	0			5642011	#N/A	0			5642011
564	2012	5642012	陕西省	陕西	陕西2012	2.48491	0.0179969	武晓玲	5642012武晓玲	独立董事	1		马永庆	5642012马永庆	董事长	0		马超	5642012马超	副董事长,总裁	0		强力	5642012强力	独立董事	1	0	周宝成	5642012周宝成	独立董事	1	0		5642012	#N/A	0			5642012	#N/A	0			5642012	#N/A	0			5642012
564	2017	5642017	陕西省	陕西	陕西2017	6.01372	0.0175059	武晓玲	5642017武晓玲	独立董事	1		何家福	5642017何家福	董事,总裁(首席执行官),董事长,董事长(代理)	0		韩玮	5642017韩玮	财务总监,董事	0		陈日进	5642017陈日进	独立董事	1	0	白永秀	5642017白永秀	独立董事	1	0		5642017	#N/A	0			5642017	#N/A	0			5642017	#N/A	0			5642017
564	2018	5642018	陕西省	陕西	陕西2018	6.60259	0.0192411	白永秀	5642018白永秀	独立董事	1		何家福	5642018何家福	董事,董事长,总裁(首席执行官),副董事长	0		马永庆	5642018马永庆	董事	0		田高良	5642018田高良	独立董事	1	0	郭亚军	5642018郭亚军	独立董事	1	0		5642018	#N/A	0			5642018	#N/A	0			5642018	#N/A	0			5642018
564	2020	5642020	陕西省	陕西	陕西2020	7.48099	0.0175106	田高良	5642020田高良	独立董事	1		韩玮	5642020韩玮	副董事长,董事,总经理	0		胡明哲	5642020胡明哲	董事,副总经理	0		白永秀	5642020白永秀	独立董事	1	0	郭亚军	5642020郭亚军	独立董事	1	0		5642020	#N/A	0			5642020	#N/A	0			5642020	#N/A	0			5642020
565	2013	5652013	陕西省	陕西	陕西2013	3.09104	0.0200614	黎明	5652013黎明	独立董事	1		陈世泽	5652013陈世泽	独立董事	1	0	毕胜	5652013毕胜	副董事长,副总经理	0			5652013	#N/A	0			5652013	#N/A	0			5652013	#N/A	0			5652013	#N/A	0			5652013	#N/A	0			5652013
568	2012	5682012	四川省	四川	四川2012	#N/A	0.0142473	王雪梅	5682012王雪梅	独立董事	1		益智	5682012益智	独立董事	1	0	江域会	5682012江域会	董事,党委副书记,纪委书记,工会主席	0			5682012	#N/A	0			5682012	#N/A	0			5682012	#N/A	0			5682012	#N/A	0			5682012	#N/A	0			5682012
568	2016	5682016	四川省	四川	四川2016	0.693147	0.0172122	谭丽丽	5682016谭丽丽	独立董事	1		杜坤伦	5682016杜坤伦	独立董事	1	0	钱旭	5682016钱旭	董事	0			5682016	#N/A	0			5682016	#N/A	0			5682016	#N/A	0			5682016	#N/A	0			5682016	#N/A	0			5682016
568	2017	5682017	四川省	四川	四川2017	0.693147	0.0162732	谭丽丽	5682017谭丽丽	独立董事	1		杜坤伦	5682017杜坤伦	独立董事	1	0	钱旭	5682017钱旭	董事	0			5682017	#N/A	0			5682017	#N/A	0			5682017	#N/A	0			5682017	#N/A	0			5682017	#N/A	0			5682017
570	2011	5702011	四川省	四川	四川2011	#N/A	0.0171572	曹慧明	5702011曹慧明	独立董事	1		朱剑明	5702011朱剑明	独立董事	1	0	何建光	5702011何建光	董事,总经理,总工程师	0			5702011	#N/A	0			5702011	#N/A	0			5702011	#N/A	0			5702011	#N/A	0			5702011	#N/A	0			5702011
576	2010	5762010	海南省	海南	海南2010	#N/A	0.0195746	蔡勇	5762010蔡勇	#N/A	0		方小潮	5762010方小潮	董事,副总裁	0		刘智勇	5762010刘智勇	#N/A	0			5762010	#N/A	0			5762010	#N/A	0			5762010	#N/A	0			5762010	#N/A	0			5762010	#N/A	0			5762010
576	2018	5762018	海南省	海南	海南2018	5.04986	0.0227186	曾伟	5762018曾伟	独立董事	1		朱义坤	5762018朱义坤	独立董事	1	0	雷忠	5762018雷忠	董事,副总裁,财务总监	0			5762018	#N/A	0			5762018	#N/A	0			5762018	#N/A	0			5762018	#N/A	0			5762018	#N/A	0			5762018
581	2013	5812013	江苏省	江苏	江苏2013	#N/A	0.0259388	张洪发	5812013张洪发	独立董事	1		俞小莉	5812013俞小莉	独立董事	1	0	华婉蓉	5812013华婉蓉	董事	0			5812013	#N/A	0			5812013	#N/A	0			5812013	#N/A	0			5812013	#N/A	0			5812013	#N/A	0			5812013
581	2018	5812018	江苏省	江苏	江苏2018	2.56495	0.0202007	金章罗	5812018金章罗	独立董事	1	1	徐小芳	5812018徐小芳	独立董事	1	0	华婉蓉	5812018华婉蓉	董事	0			5812018	#N/A	0			5812018	#N/A	0			5812018	#N/A	0			5812018	#N/A	0			5812018	#N/A	0			5812018
582	2012	5822012	江苏省	江苏	江苏2012	#N/A	0.0197756	邓远志	5822012邓远志	独立董事	1		黄志堂	5822012黄志堂	董事	0		甘宏亮	5822012甘宏亮	董事,副总经理,财务总监	0		张忠国	5822012张忠国	独立董事	1	0	孙泽华	5822012孙泽华	独立董事	1	0		5822012	#N/A	0			5822012	#N/A	0			5822012	#N/A	0			5822012
584	2012	5842012	江苏省	江苏	江苏2012	#N/A	0.0197756	卢侠巍	5842012卢侠巍	独立董事	1		邓文胜	5842012邓文胜	独立董事	1	0	牛福元	5842012牛福元	董事,副总经理,财务总监	0			5842012	#N/A	0			5842012	#N/A	0			5842012	#N/A	0			5842012	#N/A	0			5842012	#N/A	0			5842012
584	2013	5842013	江苏省	江苏	江苏2013	#N/A	0.0259388	卢侠巍	5842013卢侠巍	独立董事	1		邓文胜	5842013邓文胜	独立董事	1	0	牛福元	5842013牛福元	董事,副总经理,财务总监	0			5842013	#N/A	0			5842013	#N/A	0			5842013	#N/A	0			5842013	#N/A	0			5842013	#N/A	0			5842013
585	2011	5852011	江苏省	江苏	江苏2011	#N/A	0.0206757		5852011	#N/A	0			5852011	#N/A	0			5852011	#N/A	0			5852011	#N/A	0			5852011	#N/A	0			5852011	#N/A	0			5852011	#N/A	0			5852011	#N/A	0			5852011
586	2013	5862013	江苏省	江苏	江苏2013	#N/A	0.0259388	徐小文	5862013徐小文	董事长,总经理	0		周健	5862013周健	独立董事	1	0	唐琳	5862013唐琳	独立董事	1	0		5862013	#N/A	0			5862013	#N/A	0			5862013	#N/A	0			5862013	#N/A	0			5862013	#N/A	0			5862013
586	2014	5862014	江苏省	江苏	江苏2014	#N/A	0.0247383	徐小文	5862014徐小文	董事长,总经理	0		周健	5862014周健	独立董事	1	0	唐琳	5862014唐琳	独立董事	1	0		5862014	#N/A	0			5862014	#N/A	0			5862014	#N/A	0			5862014	#N/A	0			5862014	#N/A	0			5862014
586	2017	5862017	江苏省	江苏	江苏2017	2.48491	0.0210849	罗劲	5862017罗劲	董事长	0		刘中一	5862017刘中一	董事,副总经理	0		蒋春晨	5862017蒋春晨	独立董事	1	0		5862017	#N/A	0			5862017	#N/A	0			5862017	#N/A	0			5862017	#N/A	0			5862017	#N/A	0			5862017
587	2011	5872011	江苏省	江苏	江苏2011	#N/A	0.0206757	胡凤滨	5872011胡凤滨	独立董事	1		李子学	5872011李子学	独立董事	1	0	蔡伟	5872011蔡伟	独立董事	1	0		5872011	#N/A	0			5872011	#N/A	0			5872011	#N/A	0			5872011	#N/A	0			5872011	#N/A	0			5872011
591	2011	5912011	江苏省	江苏	江苏2011	#N/A	0.0206757	李豫湘	5912011李豫湘	独立董事	1		任红	5912011任红	独立董事	1	0	王小军	5912011王小军	董事长	0			5912011	#N/A	0			5912011	#N/A	0			5912011	#N/A	0			5912011	#N/A	0			5912011	#N/A	0			5912011
591	2012	5912012	江苏省	江苏	江苏2012	#N/A	0.0197756	李豫湘	5912012李豫湘	独立董事	1		程耕	5912012程耕	#N/A	0		任红	5912012任红	独立董事	1	0		5912012	#N/A	0			5912012	#N/A	0			5912012	#N/A	0			5912012	#N/A	0			5912012	#N/A	0			5912012
591	2014	5912014	江苏省	江苏	江苏2014	#N/A	0.0247383	李豫湘	5912014李豫湘	独立董事	1		程耕	5912014程耕	#N/A	0		任红	5912014任红	独立董事	1	0		5912014	#N/A	0			5912014	#N/A	0			5912014	#N/A	0			5912014	#N/A	0			5912014	#N/A	0			5912014
591	2015	5912015	江苏省	江苏	江苏2015	#N/A	0.0237915	彭珏	5912015彭珏	#N/A	0		杨安勤	5912015杨安勤	#N/A	0		陈川	5912015陈川	#N/A	0			5912015	#N/A	0			5912015	#N/A	0			5912015	#N/A	0			5912015	#N/A	0			5912015	#N/A	0			5912015
591	2016	5912016	江苏省	江苏	江苏2016	0.693147	0.0231946	李岳军	5912016李岳军	独立董事	1	1	黄振中	5912016黄振中	独立董事	1	1	王利娟	5912016王利娟	非独立董事	0			5912016	#N/A	0			5912016	#N/A	0			5912016	#N/A	0			5912016	#N/A	0			5912016	#N/A	0			5912016
593	2012	5932012	福建省	福建	福建2012	#N/A	0.0174656	李莉	5932012李莉	独立董事	1		史祺	5932012史祺	独立董事	1	0	刘强	5932012刘强	董事,总经理	0			5932012	#N/A	0			5932012	#N/A	0			5932012	#N/A	0			5932012	#N/A	0			5932012	#N/A	0			5932012
593	2017	5932017	福建省	福建	福建2017	1.94591	0.0220731	钟彦	5932017钟彦	独立董事	1		李莉	5932017李莉	独立董事	1	0	常士生	5932017常士生	董事,常务副总经理	0			5932017	#N/A	0			5932017	#N/A	0			5932017	#N/A	0			5932017	#N/A	0			5932017	#N/A	0			5932017
593	2018	5932018	福建省	福建	福建2018	2.3979	0.0239449	钟彦	5932018钟彦	独立董事	1		杨波	5932018杨波	独立董事	1	0	常士生	5932018常士生	董事,常务副总经理	0			5932018	#N/A	0			5932018	#N/A	0			5932018	#N/A	0			5932018	#N/A	0			5932018	#N/A	0			5932018
594	2013	5942013	福建省	福建	福建2013	#N/A	0.0214459	李书锋	5942013李书锋	独立董事	1		周静波	5942013周静波	#N/A	0		杨德勇	5942013杨德勇	#N/A	0			5942013	#N/A	0			5942013	#N/A	0			5942013	#N/A	0			5942013	#N/A	0			5942013	#N/A	0			5942013
594	2014	5942014	福建省	福建	福建2014	#N/A	0.0233178	李书锋	5942014李书锋	独立董事	1		杨春明	5942014杨春明	独立董事	1	0	杨向东	5942014杨向东	独立董事	1	0		5942014	#N/A	0			5942014	#N/A	0			5942014	#N/A	0			5942014	#N/A	0			5942014	#N/A	0			5942014
595	2017	5952017	福建省	福建	福建2017	1.94591	0.0220731	张文君	5952017张文君	独立董事	1		王静波	5952017王静波	董事	0		霍言	5952017霍言	副董事长,董事	0		王天鹏	5952017王天鹏	独立董事	1	0		5952017	#N/A	0			5952017	#N/A	0			5952017	#N/A	0			5952017	#N/A	0			5952017
595	2018	5952018	福建省	福建	福建2018	2.3979	0.0239449	张文君	5952018张文君	独立董事	1		王静波	5952018王静波	董事	0		霍言	5952018霍言	董事	0		王天鹏	5952018王天鹏	独立董事	1	0		5952018	#N/A	0			5952018	#N/A	0			5952018	#N/A	0			5952018	#N/A	0			5952018
595	2019	5952019	福建省	福建	福建2019	3.13549	0.0220985	张文君	5952019张文君	独立董事	1		王静波	5952019王静波	董事长	0		霍言	5952019霍言	#N/A	0		王天鹏	5952019王天鹏	独立董事	1	0		5952019	#N/A	0			5952019	#N/A	0			5952019	#N/A	0			5952019	#N/A	0			5952019
596	2011	5962011	安徽省	安徽	安徽2011	0.693147	0.0177839	王瑞华	5962011王瑞华	独立董事	1		吴慈生	5962011吴慈生	独立董事	1	0	刘立宾	5962011刘立宾	独立董事	1	0	梁金辉	5962011梁金辉	董事,总经理	0		叶长青	5962011叶长青	董事,副总经理,董事会秘书,总会计师	0			5962011	#N/A	0			5962011	#N/A	0			5962011	#N/A	0			5962011
597	2017	5972017	安徽省	安徽	安徽2017	3.43399	0.0173611	姚海鑫	5972017姚海鑫	独立非执行董事	1		梁宏伟	5972017梁宏伟	副董事长,董事	0		周凯	5972017周凯	董事,副总裁	0		梁杰	5972017梁杰	独立董事	1	0	吴凤君	5972017吴凤君	独立董事	1	0		5972017	#N/A	0			5972017	#N/A	0			5972017	#N/A	0			5972017
598	2021	5982021	四川省	四川	四川2021	9.03133	0.0195264	姜玉梅	5982021姜玉梅	独立董事	1	1	许瑜晗	5982021许瑜晗	非独立董事	0		王运陈	5982021王运陈	独立董事	1	1		5982021	#N/A	0			5982021	#N/A	0			5982021	#N/A	0			5982021	#N/A	0			5982021	#N/A	0			5982021
599	2012	5992012	四川省	四川	四川2012	#N/A	0.0142473	于珊	5992012于珊	独立董事	1		王厚宝	5992012王厚宝	独立董事	1	0	赵红梅	5992012赵红梅	独立董事	1	0	宋新	5992012宋新	董事,总经理	0		王幸友	5992012王幸友	董事,董事会秘书	0			5992012	#N/A	0			5992012	#N/A	0			5992012	#N/A	0			5992012
600	2016	6002016	河北省	河北	河北2016	#N/A	0.0292976		6002016	#N/A	0			6002016	#N/A	0			6002016	#N/A	0			6002016	#N/A	0			6002016	#N/A	0			6002016	#N/A	0			6002016	#N/A	0			6002016	#N/A	0			6002016
601	2012	6012012	河北省	河北	河北2012	0.693147	0.0192798	陈来泉	6012012陈来泉	董事长	0		肖南贵	6012012肖南贵	副董事长,总经理	0		柯少华	6012012柯少华	独立董事	1	0	莫玲	6012012莫玲	独立董事	1	0	林睦翔	6012012林睦翔	独立董事	1	0		6012012	#N/A	0			6012012	#N/A	0			6012012	#N/A	0			6012012
601	2014	6012014	河北省	河北	河北2014	0.693147	0.025686	陈来泉	6012014陈来泉	董事长,董事	0		周皓琳	6012014周皓琳	董事	0		陈明	6012014陈明	独立董事	1	0	龚艳萍	6012014龚艳萍	独立董事	1	0	向才菊	6012014向才菊	独立董事	1	0		6012014	#N/A	0			6012014	#N/A	0			6012014	#N/A	0			6012014
601	2015	6012015	河北省	河北	河北2015	2.19722	0.0292826	陈来泉	6012015陈来泉	董事长	0		周皓琳	6012015周皓琳	董事	0		陈明	6012015陈明	独立董事	1	0	龚艳萍	6012015龚艳萍	独立董事	1	0	向才菊	6012015向才菊	独立董事	1	0		6012015	#N/A	0			6012015	#N/A	0			6012015	#N/A	0			6012015
601	2017	6012017	河北省	河北	河北2017	2.3979	0.0248665	陈琳	6012017陈琳	董事	0		陈来泉	6012017陈来泉	董事长	0		苏运法	6012017苏运法	独立董事	1	0	陈燕	6012017陈燕	独立董事	1	1		6012017	#N/A	0			6012017	#N/A	0			6012017	#N/A	0			6012017	#N/A	0			6012017
602	2010	6022010	河北省	河北	河北2010	#N/A	0.0137727	刁云涛	6022010刁云涛	独立董事	1		顾清明	6022010顾清明	独立董事	1	0	孙红旗	6022010孙红旗	董事	0			6022010	#N/A	0			6022010	#N/A	0			6022010	#N/A	0			6022010	#N/A	0			6022010	#N/A	0			6022010
602	2011	6022011	河北省	河北	河北2011	#N/A	0.0173327	刁云涛	6022011刁云涛	独立董事	1		顾清明	6022011顾清明	独立董事	1	0	孙红旗	6022011孙红旗	董事	0			6022011	#N/A	0			6022011	#N/A	0			6022011	#N/A	0			6022011	#N/A	0			6022011	#N/A	0			6022011
606	2017	6062017	北京市	北京	北京2017	#N/A	0.0270469	韩传模	6062017韩传模	独立董事	1		俞丽辉	6062017俞丽辉	独立董事	1	0	袁军	6062017袁军	独立董事	1	0		6062017	#N/A	0			6062017	#N/A	0			6062017	#N/A	0			6062017	#N/A	0			6062017	#N/A	0			6062017
606	2022	6062022	北京市	北京	北京2022	7.92588	0.0163973	高杨	6062022高杨	董事	0		陈胜华	6062022陈胜华	独立董事	1	0	吴亚	6062022吴亚	独立董事	1	0		6062022	#N/A	0			6062022	#N/A	0			6062022	#N/A	0			6062022	#N/A	0			6062022	#N/A	0			6062022
607	2019	6072019	浙江省	浙江	浙江2019	4.81218	0.0120027	叶雪芳	6072019叶雪芳	独立董事	1		鲍林强	6072019鲍林强	副董事长,非独立董事	0		郭全中	6072019郭全中	独立董事	1	0		6072019	#N/A	0			6072019	#N/A	0			6072019	#N/A	0			6072019	#N/A	0			6072019	#N/A	0			6072019
607	2020	6072020	浙江省	浙江	浙江2020	4.26268	0.0131053	叶雪芳	6072020叶雪芳	独立董事	1		郭全中	6072020郭全中	独立董事	1	0		6072020	#N/A	0			6072020	#N/A	0			6072020	#N/A	0			6072020	#N/A	0			6072020	#N/A	0			6072020	#N/A	0			6072020
608	2010	6082010	浙江省	浙江	浙江2010	#N/A	0.0187642	黄翼忠	6082010黄翼忠	独立董事	1		徐祥圣	6082010徐祥圣	独立董事	1	0	孙建军	6082010孙建军	董事	0			6082010	#N/A	0			6082010	#N/A	0			6082010	#N/A	0			6082010	#N/A	0			6082010	#N/A	0			6082010
608	2012	6082012	浙江省	浙江	浙江2012	#N/A	0.019422	黄翼忠	6082012黄翼忠	独立董事	1		徐祥圣	6082012徐祥圣	独立董事	1	0	孙建军	6082012孙建军	董事	0			6082012	#N/A	0			6082012	#N/A	0			6082012	#N/A	0			6082012	#N/A	0			6082012	#N/A	0			6082012
609	2017	6092017	浙江省	浙江	浙江2017	1.09861	0.0181469	郑宽	6092017郑宽	董事长,总经理	0		刘燃	6092017刘燃	独立董事	1	0	陈持平	6092017陈持平	独立董事	1	0		6092017	#N/A	0			6092017	#N/A	0			6092017	#N/A	0			6092017	#N/A	0			6092017	#N/A	0			6092017
609	2018	6092018	浙江省	浙江	浙江2018	1.79176	0.0193728	刘云平	6092018刘云平	独立董事	1		隋平	6092018隋平	独立董事	1	0	丁湘巍	6092018丁湘巍	董事	0			6092018	#N/A	0			6092018	#N/A	0			6092018	#N/A	0			6092018	#N/A	0			6092018	#N/A	0			6092018
610	2015	6102015	浙江省	浙江	浙江2015	0.693147	0.022429	马晓辉	6102015马晓辉	独立董事	1		岳福云	6102015岳福云	董事,常务副总经理	0		金博	6102015金博	独立董事	1	0		6102015	#N/A	0			6102015	#N/A	0			6102015	#N/A	0			6102015	#N/A	0			6102015	#N/A	0			6102015
610	2017	6102017	浙江省	浙江	浙江2017	1.09861	0.0181469	李铁军	6102017李铁军	独立董事	1		段伟	6102017段伟	非独立董事,常务副总经理	0		金博	6102017金博	独立董事	1	0		6102017	#N/A	0			6102017	#N/A	0			6102017	#N/A	0			6102017	#N/A	0			6102017	#N/A	0			6102017
610	2018	6102018	浙江省	浙江	浙江2018	1.79176	0.0193728	李铁军	6102018李铁军	独立董事	1		景英杰	6102018景英杰	董事	0		金博	6102018金博	独立董事	1	0		6102018	#N/A	0			6102018	#N/A	0			6102018	#N/A	0			6102018	#N/A	0			6102018	#N/A	0			6102018
610	2019	6102019	浙江省	浙江	浙江2019	4.81218	0.0120027	李铁军	6102019李铁军	独立董事	1		景英杰	6102019景英杰	副总经理,董事	0		金博	6102019金博	独立董事	1	0		6102019	#N/A	0			6102019	#N/A	0			6102019	#N/A	0			6102019	#N/A	0			6102019	#N/A	0			6102019
610	2022	6102022	浙江省	浙江	浙江2022	9.81263	0.013772	张俊瑞	6102022张俊瑞	独立董事	1		郭养团	6102022郭养团	非独立董事,副总经理,董事会秘书	0		傅瑜	6102022傅瑜	独立董事	1	0		6102022	#N/A	0			6102022	#N/A	0			6102022	#N/A	0			6102022	#N/A	0			6102022	#N/A	0			6102022
610	2023	6102023	浙江省	浙江	浙江2023	9.74326	#N/A	刘文忠	6102023刘文忠	非独立董事,董事会秘书,财务总监	0		张俊瑞	6102023张俊瑞	独立董事	1	1	傅瑜	6102023傅瑜	独立董事	1	0		6102023	#N/A	0			6102023	#N/A	0			6102023	#N/A	0			6102023	#N/A	0			6102023	#N/A	0			6102023
611	2010	6112010	浙江省	浙江	浙江2010	#N/A	0.0187642	求嫣红	6112010求嫣红	#N/A	0		舒建	6112010舒建	独立董事	1	0	濮黎明	6112010濮黎明	董事长,总经理	0		周应苗	6112010周应苗	独立董事	1	0		6112010	#N/A	0			6112010	#N/A	0			6112010	#N/A	0			6112010	#N/A	0			6112010
611	2015	6112015	浙江省	浙江	浙江2015	0.693147	0.022429	周应苗	6112015周应苗	独立董事	1		邱士杰	6112015邱士杰	董事长,总经理	0		舒建	6112015舒建	独立董事	1	0		6112015	#N/A	0			6112015	#N/A	0			6112015	#N/A	0			6112015	#N/A	0			6112015	#N/A	0			6112015
612	2013	6122013	河南省	河南	河南2013	1.79176	0.0150365	孟钟剑	6122013孟钟剑	独立董事	1		黄振彬	6122013黄振彬	董事,党委书记	0		卢东亮	6122013卢东亮	董事	0		刘立斌	6122013刘立斌	独立董事	1	0	孙响林	6122013孙响林	独立董事	1	0		6122013	#N/A	0			6122013	#N/A	0			6122013	#N/A	0			6122013
613	2018	6132018	河南省	河南	河南2018	4.46591	0.0189316	唐国平	6132018唐国平	独立董事	1	1	吴涛	6132018吴涛	独立董事	1	0	唐山荣	6132018唐山荣	董事	0			6132018	#N/A	0			6132018	#N/A	0			6132018	#N/A	0			6132018	#N/A	0			6132018	#N/A	0			6132018
613	2020	6132020	河南省	河南	河南2020	5.15329	0.020523	唐国平	6132020唐国平	独立董事	1	1	吴涛	6132020吴涛	独立董事	1	0	唐山荣	6132020唐山荣	董事	0			6132020	#N/A	0			6132020	#N/A	0			6132020	#N/A	0			6132020	#N/A	0			6132020	#N/A	0			6132020
617	2015	6172015	山东省	山东	山东2015	4.15888	0.0157355	丁晓东	6172015丁晓东	独立董事	1		唐祖华	6172015唐祖华	董事	0		吕玉芹	6172015吕玉芹	独立董事	1	0		6172015	#N/A	0			6172015	#N/A	0			6172015	#N/A	0			6172015	#N/A	0			6172015	#N/A	0			6172015
622	2022	6222022	北京市	北京	北京2022	7.92588	0.0163973	黄威	6222022黄威	独立董事	1		王幸辉	6222022王幸辉	独立董事	1	1	张华	6222022张华	非独立董事,副总裁,财务总监	0			6222022	#N/A	0			6222022	#N/A	0			6222022	#N/A	0			6222022	#N/A	0			6222022	#N/A	0			6222022
623	2015	6232015	吉林省	吉林	吉林2015	#N/A	0.0166667	韩波	6232015韩波	独立董事	1		郭淑芹	6232015郭淑芹	董事	0		吕桂霞	6232015吕桂霞	独立董事	1	0		6232015	#N/A	0			6232015	#N/A	0			6232015	#N/A	0			6232015	#N/A	0			6232015	#N/A	0			6232015
623	2017	6232017	吉林省	吉林	吉林2017	#N/A	0.0143316	毕焱	6232017毕焱	独立董事	1		吕桂霞	6232017吕桂霞	独立董事	1	0	杨凯	6232017杨凯	董事,副总经理	0			6232017	#N/A	0			6232017	#N/A	0			6232017	#N/A	0			6232017	#N/A	0			6232017	#N/A	0			6232017
623	2023	6232023	吉林省	吉林	吉林2023	7.61283	#N/A	杨凯	6232023杨凯	董事,副总经理	0		梁毕明	6232023梁毕明	独立董事	1	0	肖维维	6232023肖维维	独立董事	1	0		6232023	#N/A	0			6232023	#N/A	0			6232023	#N/A	0			6232023	#N/A	0			6232023	#N/A	0			6232023
625	2012	6252012	重庆市	重庆	重庆2012	#N/A	0.0159735	彭韶兵	6252012彭韶兵	独立董事	1		陈重	6252012陈重	独立董事	1	0	王志雄	6252012王志雄	独立董事	1	0	王锟	6252012王锟	董事	0		张宝林	6252012张宝林	董事,总裁	0			6252012	#N/A	0			6252012	#N/A	0			6252012	#N/A	0			6252012
625	2013	6252013	重庆市	重庆	重庆2013	#N/A	0.0234831	彭韶兵	6252013彭韶兵	独立董事	1		陈重	6252013陈重	独立董事	1	0	王志雄	6252013王志雄	独立董事	1	0	王锟	6252013王锟	董事,副总裁	0		张宝林	6252013张宝林	董事,总裁	0			6252013	#N/A	0			6252013	#N/A	0			6252013	#N/A	0			6252013
625	2014	6252014	重庆市	重庆	重庆2014	#N/A	0.0187249	彭韶兵	6252014彭韶兵	独立董事	1		陈重	6252014陈重	独立董事	1	0	王志雄	6252014王志雄	独立董事	1	0	王锟	6252014王锟	董事,副总裁,董事会秘书(代理)	0		张宝林	6252014张宝林	副董事长,总裁	0			6252014	#N/A	0			6252014	#N/A	0			6252014	#N/A	0			6252014
626	2010	6262010	重庆市	重庆	重庆2010	#N/A	0.0170538		6262010	#N/A	0			6262010	#N/A	0			6262010	#N/A	0			6262010	#N/A	0			6262010	#N/A	0			6262010	#N/A	0			6262010	#N/A	0			6262010	#N/A	0			6262010
626	2011	6262011	重庆市	重庆	重庆2011	#N/A	0.0211108		6262011	#N/A	0			6262011	#N/A	0			6262011	#N/A	0			6262011	#N/A	0			6262011	#N/A	0			6262011	#N/A	0			6262011	#N/A	0			6262011	#N/A	0			6262011
626	2015	6262015	重庆市	重庆	重庆2015	#N/A	0.0232457	张静璃	6262015张静璃	独立董事	1		赵良兴	6262015赵良兴	董事	0		白新华	6262015白新华	董事	0		李华	6262015李华	独立董事	1	0	余春生	6262015余春生	独立董事	1	0		6262015	#N/A	0			6262015	#N/A	0			6262015	#N/A	0			6262015
627	2014	6272014	重庆市	重庆	重庆2014	#N/A	0.0187249	李伟	6272014李伟	独立董事	1		项光亚	6272014项光亚	独立董事	1	0	朱晓兵	6272014朱晓兵	财务总监(代理),董事,副总经理	0			6272014	#N/A	0			6272014	#N/A	0			6272014	#N/A	0			6272014	#N/A	0			6272014	#N/A	0			6272014
627	2015	6272015	重庆市	重庆	重庆2015	#N/A	0.0232457	姜海华	6272015姜海华	独立董事	1		项光亚	6272015项光亚	独立董事	1	0	肖云华	6272015肖云华	董事,总经理,董事长	0			6272015	#N/A	0			6272015	#N/A	0			6272015	#N/A	0			6272015	#N/A	0			6272015	#N/A	0			6272015
628	2020	6282020	湖北省	湖北	湖北2020	3.3673	0.0139769	李越冬	6282020李越冬	独立董事	1		黄明	6282020黄明	独立董事	1	0	辜明安	6282020辜明安	独立董事	1	0	任正	6282020任正	董事长	0			6282020	#N/A	0			6282020	#N/A	0			6282020	#N/A	0			6282020	#N/A	0			6282020
629	2017	6292017	四川省	四川	四川2017	0.693147	0.0162732	吉利	6292017吉利	独立董事	1		马连勇	6292017马连勇	非独立董事	0		严洪	6292017严洪	独立董事	1	0		6292017	#N/A	0			6292017	#N/A	0			6292017	#N/A	0			6292017	#N/A	0			6292017	#N/A	0			6292017
629	2018	6292018	四川省	四川	四川2018	3.17805	0.0199863	吉利	6292018吉利	独立董事	1		张景凡	6292018张景凡	非独立董事	0		严洪	6292018严洪	独立董事	1	0		6292018	#N/A	0			6292018	#N/A	0			6292018	#N/A	0			6292018	#N/A	0			6292018	#N/A	0			6292018
629	2020	6292020	四川省	四川	四川2020	3.43399	0.0165098	张景凡	6292020张景凡	非独立董事	0		严洪	6292020严洪	独立董事	1	0	米拓	6292020米拓	独立董事	1	0		6292020	#N/A	0			6292020	#N/A	0			6292020	#N/A	0			6292020	#N/A	0			6292020	#N/A	0			6292020
629	2022	6292022	四川省	四川	四川2022	9.14452	0.0177539	谢正敏	6292022谢正敏	非独立董事,副总经理,财务负责人,董事会秘书	0		米拓	6292022米拓	独立董事	1	0	刘胜良	6292022刘胜良	独立董事	1	0		6292022	#N/A	0			6292022	#N/A	0			6292022	#N/A	0			6292022	#N/A	0			6292022	#N/A	0			6292022
630	2012	6302012	安徽省	安徽	安徽2012	1.60944	0.0183712	姚禄仕	6302012姚禄仕	独立董事	1		汤书昆	6302012汤书昆	独立董事	1	0	杨军	6302012杨军	副董事长,总经理	0		杨运杰	6302012杨运杰	独立董事	1	0	李明发	6302012李明发	独立董事	1	0	吴和平	6302012吴和平	董事,董事会秘书	0			6302012	#N/A	0		吴国忠	6302012吴国忠	董事	0			6302012
630	2018	6302018	安徽省	安徽	安徽2018	2.3979	0.0204296	潘立生	6302018潘立生	独立董事	1		汪莉	6302018汪莉	独立董事	1	0	王昶	6302018王昶	独立董事	1	0	刘放来	6302018刘放来	独立董事	1	0	李文	6302018李文	董事	0		吴和平	6302018吴和平	董事,董事会秘书	0			6302018	#N/A	0			6302018	#N/A	0			6302018
630	2020	6302020	安徽省	安徽	安徽2020	4.69135	0.011744	刘放来	6302020刘放来	独立董事	1	1	王昶	6302020王昶	独立董事	1	0	姚禄仕	6302020姚禄仕	独立董事	1	0	周俊	6302020周俊	董事	0		吴和平	6302020吴和平	董事,董事会秘书	0		汪莉	6302020汪莉	独立董事	1	0		6302020	#N/A	0			6302020	#N/A	0			6302020
630	2021	6302021	安徽省	安徽	安徽2021	9.33433	0.0165682	刘放来	6302021刘放来	独立董事	1	1	王昶	6302021王昶	独立董事	1	0	姚禄仕	6302021姚禄仕	独立董事	1	0	周俊	6302021周俊	董事	0		吴和平	6302021吴和平	董事,董事会秘书	0		汪莉	6302021汪莉	独立董事	1	0		6302021	#N/A	0			6302021	#N/A	0			6302021
631	2018	6312018	安徽省	安徽	安徽2018	2.3979	0.0204296	周亚力	6312018周亚力	独立董事	1		唐国华	6312018唐国华	独立董事	1	0	孙坚	6312018孙坚	董事	0			6312018	#N/A	0			6312018	#N/A	0			6312018	#N/A	0			6312018	#N/A	0			6312018	#N/A	0			6312018
632	2017	6322017	福建省	福建	福建2017	1.94591	0.0220731	陈雄	6322017陈雄	独立董事	1		王林	6322017王林	独立董事	1	0	蔡钦铭	6322017蔡钦铭	副总裁,董事	0			6322017	#N/A	0			6322017	#N/A	0			6322017	#N/A	0			6322017	#N/A	0			6322017	#N/A	0			6322017
632	2023	6322023	福建省	福建	福建2023	8.43229	#N/A	徐青	6322023徐青	独立董事	1		蔡钦铭	6322023蔡钦铭	董事,副总裁	0		王颖彬	6322023王颖彬	独立董事	1	0		6322023	#N/A	0			6322023	#N/A	0			6322023	#N/A	0			6322023	#N/A	0			6322023	#N/A	0			6322023
633	2017	6332017	福建省	福建	福建2017	1.94591	0.0220731	龚巧莉	6332017龚巧莉	独立董事	1		李红	6332017李红	董事	0		黄昌华	6332017黄昌华	独立董事	1	0		6332017	#N/A	0			6332017	#N/A	0			6332017	#N/A	0			6332017	#N/A	0			6332017	#N/A	0			6332017
635	2013	6352013	宁夏回族自治区	宁夏	宁夏2013	#N/A	0.0153025	徐敬旗	6352013徐敬旗	独立董事	1		赵晓莉	6352013赵晓莉	董事	0		刘万毅	6352013刘万毅	独立董事	1	0		6352013	#N/A	0			6352013	#N/A	0			6352013	#N/A	0			6352013	#N/A	0			6352013	#N/A	0			6352013
635	2016	6352016	宁夏回族自治区	宁夏	宁夏2016	#N/A	0.0187699	李耀忠	6352016李耀忠	独立董事	1		赵晓莉	6352016赵晓莉	董事	0		王宁刚	6352016王宁刚	独立董事	1	0		6352016	#N/A	0			6352016	#N/A	0			6352016	#N/A	0			6352016	#N/A	0			6352016	#N/A	0			6352016
635	2018	6352018	宁夏回族自治区	宁夏	宁夏2018	1.09861	0.0225042	李耀忠	6352018李耀忠	独立董事	1		赵晓莉	6352018赵晓莉	董事	0		王宁刚	6352018王宁刚	独立董事	1	0		6352018	#N/A	0			6352018	#N/A	0			6352018	#N/A	0			6352018	#N/A	0			6352018	#N/A	0			6352018
635	2019	6352019	宁夏回族自治区	宁夏	宁夏2019	#N/A	0.0173168	李耀忠	6352019李耀忠	独立董事	1		姜汉国	6352019姜汉国	董事	0		王宁刚	6352019王宁刚	独立董事	1	0		6352019	#N/A	0			6352019	#N/A	0			6352019	#N/A	0			6352019	#N/A	0			6352019	#N/A	0			6352019
635	2020	6352020	宁夏回族自治区	宁夏	宁夏2020	0.693147	0.0205823	李耀忠	6352020李耀忠	独立董事	1		姜汉国	6352020姜汉国	董事	0		王宁刚	6352020王宁刚	独立董事	1	0		6352020	#N/A	0			6352020	#N/A	0			6352020	#N/A	0			6352020	#N/A	0			6352020	#N/A	0			6352020
636	2015	6362015	宁夏回族自治区	宁夏	宁夏2015	#N/A	0.016537	苏武俊	6362015苏武俊	独立董事	1		幸建超	6362015幸建超	董事,总经理	0		于海涌	6362015于海涌	独立董事	1	0		6362015	#N/A	0			6362015	#N/A	0			6362015	#N/A	0			6362015	#N/A	0			6362015	#N/A	0			6362015
636	2019	6362019	广东省	广东	广东2019	2.77259	0.0140111	苏武俊	6362019苏武俊	独立董事	1		王广军	6362019王广军	董事长	0		于海涌	6362019于海涌	独立董事	1	1		6362019	#N/A	0			6362019	#N/A	0			6362019	#N/A	0			6362019	#N/A	0			6362019	#N/A	0			6362019
636	2020	6362020	广东省	广东	广东2020	2.83321	0.0174561	苏武俊	6362020苏武俊	独立董事	1		王广军	6362020王广军	董事长	0		于海涌	6362020于海涌	独立董事	1	0		6362020	#N/A	0			6362020	#N/A	0			6362020	#N/A	0			6362020	#N/A	0			6362020	#N/A	0			6362020
638	2015	6382015	广东省	广东	广东2015	0.693147	0.0185536	王诚军	6382015王诚军	独立董事	1		王国强	6382015王国强	独立董事	1	0	刘玉	6382015刘玉	董事	0			6382015	#N/A	0			6382015	#N/A	0			6382015	#N/A	0			6382015	#N/A	0			6382015	#N/A	0			6382015
638	2022	6382022	广东省	广东	广东2022	9.96857	0.0155058	孙丽丽	6382022孙丽丽	独立董事	1		张宗丽	6382022张宗丽	独立董事	1	0	刘玉	6382022刘玉	副董事长	0			6382022	#N/A	0			6382022	#N/A	0			6382022	#N/A	0			6382022	#N/A	0			6382022	#N/A	0			6382022
638	2023	6382023	广东省	广东	广东2023	9.88283	#N/A	孙丽丽	6382023孙丽丽	独立董事	1		张宗丽	6382023张宗丽	独立董事	1	0	刘玉	6382023刘玉	副董事长,总经理	0			6382023	#N/A	0			6382023	#N/A	0			6382023	#N/A	0			6382023	#N/A	0			6382023	#N/A	0			6382023
639	2011	6392011	广东省	广东	广东2011	#N/A	0.0199093	于小镭	6392011于小镭	独立董事	1		文宗瑜	6392011文宗瑜	独立董事	1	0	张光水	6392011张光水	独立董事	1	0	孙新虎	6392011孙新虎	董事,董事会秘书	0		吴振金	6392011吴振金	董事,副总经理	0			6392011	#N/A	0			6392011	#N/A	0			6392011	#N/A	0			6392011
639	2012	6392012	广东省	广东	广东2012	0.693147	0.0230561	于小镭	6392012于小镭	独立董事	1		文宗瑜	6392012文宗瑜	独立董事	1	0	张光水	6392012张光水	独立董事	1	0	孙新虎	6392012孙新虎	董事,董事会秘书	0		吴振金	6392012吴振金	董事,副总经理	0			6392012	#N/A	0			6392012	#N/A	0			6392012	#N/A	0			6392012
639	2013	6392013	广东省	广东	广东2013	#N/A	0.0237707	于小镭	6392013于小镭	独立董事	1		文宗瑜	6392013文宗瑜	#N/A	0		张光水	6392013张光水	独立董事	1	0	孙新虎	6392013孙新虎	董事,董事会秘书	0		吴振金	6392013吴振金	董事,副总经理	0			6392013	#N/A	0			6392013	#N/A	0			6392013	#N/A	0			6392013
639	2014	6392014	广东省	广东	广东2014	#N/A	0.0224623	于小镭	6392014于小镭	独立董事	1		董华	6392014董华	独立董事	1	0	张光水	6392014张光水	独立董事	1	0	孙新虎	6392014孙新虎	副董事长	0		董莉莉	6392014董莉莉	董事,副总经理	0			6392014	#N/A	0			6392014	#N/A	0			6392014	#N/A	0			6392014
639	2015	6392015	广东省	广东	广东2015	0.693147	0.0185536	于小镭	6392015于小镭	独立董事	1		董华	6392015董华	独立董事	1	0	张光水	6392015张光水	独立董事	1	0	孙新虎	6392015孙新虎	副董事长	0		董莉莉	6392015董莉莉	董事,副总经理	0			6392015	#N/A	0			6392015	#N/A	0			6392015	#N/A	0			6392015
639	2016	6392016	广东省	广东	广东2016	1.94591	0.0237664	于小镭	6392016于小镭	独立董事	1		董华	6392016董华	独立董事	1	0	张光水	6392016张光水	独立董事	1	0	孙新虎	6392016孙新虎	副董事长	0		董莉莉	6392016董莉莉	董事	0			6392016	#N/A	0			6392016	#N/A	0			6392016	#N/A	0			6392016
639	2017	6392017	广东省	广东	广东2017	2.70805	0.0163228	韩本文	6392017韩本文	独立董事	1		董华	6392017董华	独立董事	1	0	孙新虎	6392017孙新虎	副董事长	0		杜君	6392017杜君	董事,副总经理	0			6392017	#N/A	0			6392017	#N/A	0			6392017	#N/A	0			6392017	#N/A	0			6392017
639	2018	6392018	广东省	广东	广东2018	2.56495	0.0175543	韩本文	6392018韩本文	独立董事	1		董华	6392018董华	独立董事	1	0	孙新虎	6392018孙新虎	副董事长	0		杜君	6392018杜君	董事,副总经理	0			6392018	#N/A	0			6392018	#N/A	0			6392018	#N/A	0			6392018	#N/A	0			6392018
639	2019	6392019	广东省	广东	广东2019	2.77259	0.0140111	韩本文	6392019韩本文	独立董事	1		董华	6392019董华	独立董事	1	0	孙新虎	6392019孙新虎	副董事长	0		杜君	6392019杜君	董事,副总经理	0			6392019	#N/A	0			6392019	#N/A	0			6392019	#N/A	0			6392019	#N/A	0			6392019
650	2018	6502018	江西省	江西	江西2018	1.09861	0.0245048	郭华平	6502018郭华平	独立董事	1		段继东	6502018段继东	独立董事	1	0	涂书田	6502018涂书田	独立董事	1	0	梅强	6502018梅强	董事长	0		张自强	6502018张自强	董事,副总经理	0			6502018	#N/A	0			6502018	#N/A	0			6502018	#N/A	0			6502018
651	2013	6512013	广东省	广东	广东2013	#N/A	0.0237707	钱爱民	6512013钱爱民	独立董事	1		朱恒鹏	6512013朱恒鹏	独立董事	1	0	董明珠	6512013董明珠	董事长,总裁	0			6512013	#N/A	0			6512013	#N/A	0			6512013	#N/A	0			6512013	#N/A	0			6512013	#N/A	0			6512013
651	2016	6512016	广东省	广东	广东2016	1.94591	0.0237664	卢馨	6512016卢馨	独立董事	1		王如竹	6512016王如竹	独立董事	1	0	郭杨	6512016郭杨	独立董事	1	0		6512016	#N/A	0			6512016	#N/A	0			6512016	#N/A	0			6512016	#N/A	0			6512016	#N/A	0			6512016
652	2013	6522013	天津市	天津	天津2013	#N/A	0.0189633	陈敏	6522013陈敏	独立董事	1		马军	6522013马军	副董事长	0		肖红叶	6522013肖红叶	独立董事	1	0		6522013	#N/A	0			6522013	#N/A	0			6522013	#N/A	0			6522013	#N/A	0			6522013	#N/A	0			6522013
652	2023	6522023	天津市	天津	天津2023	6.54247	#N/A	崔铭伟	6522023崔铭伟	董事	0		李莉	6522023李莉	独立董事	1	1	杨鸿雁	6522023杨鸿雁	独立董事	1	0		6522023	#N/A	0			6522023	#N/A	0			6522023	#N/A	0			6522023	#N/A	0			6522023	#N/A	0			6522023
656	2010	6562010	重庆市	重庆	重庆2010	#N/A	0.0170538	林楠	6562010林楠	#N/A	0		王毅	6562010王毅	#N/A	0		曾廷敏	6562010曾廷敏	#N/A	0		刘斌	6562010刘斌	独立董事	1	0	宗书声	6562010宗书声	副董事长	0		陈兴述	6562010陈兴述	独立董事	1	0		6562010	#N/A	0			6562010	#N/A	0			6562010
661	2010	6612010	吉林省	吉林	吉林2010	#N/A	0.0126162	吴安平	6612010吴安平	独立董事	1		杨占民	6612010杨占民	董事长,总经理	0		赵志民	6612010赵志民	独立董事	1	0		6612010	#N/A	0			6612010	#N/A	0			6612010	#N/A	0			6612010	#N/A	0			6612010	#N/A	0			6612010
661	2017	6612017	吉林省	吉林	吉林2017	#N/A	0.0143316	毛志宏	6612017毛志宏	独立董事	1		程松彬	6612017程松彬	独立董事	1	0	吴安平	6612017吴安平	非独立董事	0			6612017	#N/A	0			6612017	#N/A	0			6612017	#N/A	0			6612017	#N/A	0			6612017	#N/A	0			6612017
661	2020	6612020	吉林省	吉林	吉林2020	0.693147	0.0133624	毛志宏	6612020毛志宏	独立董事	1		程松彬	6612020程松彬	独立董事	1	0	张玉智	6612020张玉智	非独立董事	0			6612020	#N/A	0			6612020	#N/A	0			6612020	#N/A	0			6612020	#N/A	0			6612020	#N/A	0			6612020
663	2016	6632016	福建省	福建	福建2016	#N/A	0.0241498	张白	6632016张白	独立董事	1		陈昌雄	6632016陈昌雄	独立董事	1	0	郑新芝	6632016郑新芝	独立董事	1	0		6632016	#N/A	0			6632016	#N/A	0			6632016	#N/A	0			6632016	#N/A	0			6632016	#N/A	0			6632016
663	2017	6632017	福建省	福建	福建2017	1.94591	0.0220731	潘越	6632017潘越	独立董事	1		郑新芝	6632017郑新芝	独立董事	1	0	罗元清	6632017罗元清	独立董事	1	0		6632017	#N/A	0			6632017	#N/A	0			6632017	#N/A	0			6632017	#N/A	0			6632017	#N/A	0			6632017
665	2019	6652019	福建省	福建	福建2019	3.13549	0.0220985	何威风	6652019何威风	独立董事	1	1	蒋红瑶	6652019蒋红瑶	非独立董事	0		蔡曼莉	6652019蔡曼莉	独立董事	1	0		6652019	#N/A	0			6652019	#N/A	0			6652019	#N/A	0			6652019	#N/A	0			6652019	#N/A	0			6652019
665	2020	6652020	福建省	福建	福建2020	2.63906	0.0207933	何威风	6652020何威风	独立董事	1	1	蒋红瑶	6652020蒋红瑶	非独立董事	0		蔡曼莉	6652020蔡曼莉	独立董事	1	0		6652020	#N/A	0			6652020	#N/A	0			6652020	#N/A	0			6652020	#N/A	0			6652020	#N/A	0			6652020
666	2017	6662017	北京市	北京	北京2017	#N/A	0.0270469		6662017	#N/A	0			6662017	#N/A	0			6662017	#N/A	0			6662017	#N/A	0			6662017	#N/A	0			6662017	#N/A	0			6662017	#N/A	0			6662017	#N/A	0			6662017
668	2021	6682021	北京市	北京	北京2021	8.1588	0.0239643	楚建忠	6682021楚建忠	非独立董事,执行总裁	0		刘长坤	6682021刘长坤	独立董事	1	0	周展	6682021周展	独立董事	1	0		6682021	#N/A	0			6682021	#N/A	0			6682021	#N/A	0			6682021	#N/A	0			6682021	#N/A	0			6682021
669	2011	6692011	北京市	北京	北京2011	#N/A	0.0196226		6692011	#N/A	0			6692011	#N/A	0			6692011	#N/A	0			6692011	#N/A	0			6692011	#N/A	0			6692011	#N/A	0			6692011	#N/A	0			6692011	#N/A	0			6692011
671	2013	6712013	福建省	福建	福建2013	#N/A	0.0214459	陈炳龙	6712013陈炳龙	独立董事	1		林贻辉	6712013林贻辉	董事	0		陈玲	6712013陈玲	独立董事	1	0		6712013	#N/A	0			6712013	#N/A	0			6712013	#N/A	0			6712013	#N/A	0			6712013	#N/A	0			6712013
672	2012	6722012	福建省	福建	福建2012	#N/A	0.0174656	潘栋民	6722012潘栋民	董事	0		何大安	6722012何大安	独立董事	1	0	黄董良	6722012黄董良	独立董事	1	0		6722012	#N/A	0			6722012	#N/A	0			6722012	#N/A	0			6722012	#N/A	0			6722012	#N/A	0			6722012
672	2018	6722018	甘肃省	甘肃	甘肃2018	1.09861	0.0187517	余俊仙	6722018余俊仙	独立董事	1		孔祥忠	6722018孔祥忠	独立董事	1	0	林国荣	6722018林国荣	副董事长	0			6722018	#N/A	0			6722018	#N/A	0			6722018	#N/A	0			6722018	#N/A	0			6722018	#N/A	0			6722018
673	2013	6732013	甘肃省	甘肃	甘肃2013	#N/A	0.0224337	蔡凌芳	6732013蔡凌芳	董事	0		陈守德	6732013陈守德	独立董事	1	0	张志林	6732013张志林	独立董事	1	0		6732013	#N/A	0			6732013	#N/A	0			6732013	#N/A	0			6732013	#N/A	0			6732013	#N/A	0			6732013
673	2014	6732014	甘肃省	甘肃	甘肃2014	#N/A	0.0206524	蔡凌芳	6732014蔡凌芳	董事	0		陈守德	6732014陈守德	独立董事	1	0	张志林	6732014张志林	独立董事	1	0		6732014	#N/A	0			6732014	#N/A	0			6732014	#N/A	0			6732014	#N/A	0			6732014	#N/A	0			6732014
673	2019	6732019	甘肃省	甘肃	甘肃2019	1.09861	0.0191526	田旺林	6732019田旺林	独立董事	1		易宪容	6732019易宪容	独立董事	1	0	蔡凌芳	6732019蔡凌芳	董事	0			6732019	#N/A	0			6732019	#N/A	0			6732019	#N/A	0			6732019	#N/A	0			6732019	#N/A	0			6732019
673	2020	6732020	甘肃省	甘肃	甘肃2020	1.60944	0.0197157	田旺林	6732020田旺林	独立董事	1		易宪容	6732020易宪容	独立董事	1	0	蔡凌芳	6732020蔡凌芳	董事	0			6732020	#N/A	0			6732020	#N/A	0			6732020	#N/A	0			6732020	#N/A	0			6732020	#N/A	0			6732020
673	2021	6732021	甘肃省	甘肃	甘肃2021	8.47533	0.0232926	田旺林	6732021田旺林	独立董事	1		易宪容	6732021易宪容	独立董事	1	0	蔡凌芳	6732021蔡凌芳	董事	0			6732021	#N/A	0			6732021	#N/A	0			6732021	#N/A	0			6732021	#N/A	0			6732021	#N/A	0			6732021
676	2014	6762014	甘肃省	甘肃	甘肃2014	#N/A	0.0206524	杜海波	6762014杜海波	独立董事	1		丁永生	6762014丁永生	独立董事	1	0	刘双河	6762014刘双河	董事长	0			6762014	#N/A	0			6762014	#N/A	0			6762014	#N/A	0			6762014	#N/A	0			6762014	#N/A	0			6762014
676	2015	6762015	河南省	河南	河南2015	3.3322	0.016777	段东辉	6762015段东辉	独立董事	1	1	余应敏	6762015余应敏	独立董事	1	0	赵立仁	6762015赵立仁	董事长,总经理	0			6762015	#N/A	0			6762015	#N/A	0			6762015	#N/A	0			6762015	#N/A	0			6762015	#N/A	0			6762015
676	2016	6762016	河南省	河南	河南2016	3.29584	0.0152979	段东辉	6762016段东辉	独立董事	1	1	余应敏	6762016余应敏	独立董事	1	0	赵立仁	6762016赵立仁	董事长,总经理	0			6762016	#N/A	0			6762016	#N/A	0			6762016	#N/A	0			6762016	#N/A	0			6762016	#N/A	0			6762016
677	2010	6772010	广东省	广东	广东2010	#N/A	0.0216352	袁明哲	6772010袁明哲	独立董事	1		韩光亭	6772010韩光亭	独立董事	1	0	刘俊峰	6772010刘俊峰	独立董事	1	0	王利民	6772010王利民	#N/A	0		李月刚	6772010李月刚	董事,副总经理	0			6772010	#N/A	0			6772010	#N/A	0			6772010	#N/A	0			6772010
677	2013	6772013	广东省	广东	广东2013	#N/A	0.0237707	王德建	6772013王德建	独立董事	1		张志鸿	6772013张志鸿	董事	0		李月刚	6772013李月刚	副总经理	0		郑植艺	6772013郑植艺	独立董事	1	0	韩光亭	6772013韩光亭	#N/A	0			6772013	#N/A	0			6772013	#N/A	0			6772013	#N/A	0			6772013
677	2015	6772015	广东省	广东	广东2015	0.693147	0.0185536	王德建	6772015王德建	独立董事	1		许深	6772015许深	董事	0		李光	6772015李光	独立董事	1	0	李建新	6772015李建新	独立董事	1	0		6772015	#N/A	0			6772015	#N/A	0			6772015	#N/A	0			6772015	#N/A	0			6772015
677	2018	6772018	广东省	广东	广东2018	2.56495	0.0175543	王德建	6772018王德建	独立董事	1		李建新	6772018李建新	独立董事	1	0	韩雪	6772018韩雪	独立董事	1	0	童亦成	6772018童亦成	董事	0		姜大广	6772018姜大广	职工董事,常务副总经理,董事会秘书	0			6772018	#N/A	0			6772018	#N/A	0			6772018	#N/A	0			6772018
677	2020	6772020	广东省	广东	广东2020	2.83321	0.0174561	李建军	6772020李建军	独立董事	1		徐天春	6772020徐天春	独立董事	1	0	李建新	6772020李建新	独立董事	1	0	虞建荣	6772020虞建荣	董事	0		姜大广	6772020姜大广	职工董事,总经理,董事会秘书	0			6772020	#N/A	0			6772020	#N/A	0			6772020	#N/A	0			6772020
678	2018	6782018	广东省	广东	广东2018	2.56495	0.0175543	高文进	6782018高文进	独立董事	1		何一心	6782018何一心	董事,副总经理	0		傅孝思	6782018傅孝思	独立董事	1	0		6782018	#N/A	0			6782018	#N/A	0			6782018	#N/A	0			6782018	#N/A	0			6782018	#N/A	0			6782018
679	2021	6792021	广东省	广东	广东2021	9.67149	0.0144675	刘应民	6792021刘应民	独立董事	1		车文辉	6792021车文辉	独立董事	1	0	李剑	6792021李剑	董事,总经理	0		熊强	6792021熊强	董事长	0		陈玲莉	6792021陈玲莉	独立董事	1	0		6792021	#N/A	0			6792021	#N/A	0			6792021	#N/A	0			6792021
681	2013	6812013	山东省	山东	山东2013	2.3979	0.0191595	刘玉平	6812013刘玉平	独立董事	1		孙琦	6812013孙琦	独立董事	1	0	赵莉	6812013赵莉	独立董事	1	0	周小南	6812013周小南	副董事长	0		俞鲲鹏	6812013俞鲲鹏	董事	0		王丽荣	6812013王丽荣	董事,总会计师	0			6812013	#N/A	0			6812013	#N/A	0			6812013
681	2015	6812015	江苏省	江苏	江苏2015	#N/A	0.0237915	钟晓林	6812015钟晓林	独立董事	1		张迪生	6812015张迪生	独立董事	1	0	王冬	6812015王冬	独立董事	1	0	王丽荣	6812015王丽荣	董事	0			6812015	#N/A	0			6812015	#N/A	0			6812015	#N/A	0			6812015	#N/A	0			6812015
682	2010	6822010	江苏省	江苏	江苏2010	#N/A	0.0213009	吕永祥	6822010吕永祥	独立董事	1		郭明瑞	6822010郭明瑞	独立董事	1	0	王清刚	6822010王清刚	董事,董事会秘书	0			6822010	#N/A	0			6822010	#N/A	0			6822010	#N/A	0			6822010	#N/A	0			6822010	#N/A	0			6822010
682	2011	6822011	江苏省	江苏	江苏2011	#N/A	0.0206757	吕永祥	6822011吕永祥	独立董事	1		郭明瑞	6822011郭明瑞	独立董事	1	0	王清刚	6822011王清刚	董事,董事会秘书	0			6822011	#N/A	0			6822011	#N/A	0			6822011	#N/A	0			6822011	#N/A	0			6822011	#N/A	0			6822011
682	2013	6822013	江苏省	江苏	江苏2013	#N/A	0.0259388	吕永祥	6822013吕永祥	独立董事	1	1	郭明瑞	6822013郭明瑞	独立董事	1	0	王清刚	6822013王清刚	董事,董事会秘书	0			6822013	#N/A	0			6822013	#N/A	0			6822013	#N/A	0			6822013	#N/A	0			6822013	#N/A	0			6822013
682	2014	6822014	江苏省	江苏	江苏2014	#N/A	0.0247383	吕永祥	6822014吕永祥	独立董事	1	1	郭明瑞	6822014郭明瑞	独立董事	1	0	王清刚	6822014王清刚	董事,董事会秘书	0			6822014	#N/A	0			6822014	#N/A	0			6822014	#N/A	0			6822014	#N/A	0			6822014	#N/A	0			6822014
682	2016	6822016	江苏省	江苏	江苏2016	0.693147	0.0231946	曲之萍	6822016曲之萍	独立董事	1		房立棠	6822016房立棠	独立董事	1	0	王清刚	6822016王清刚	董事,董事会秘书	0			6822016	#N/A	0			6822016	#N/A	0			6822016	#N/A	0			6822016	#N/A	0			6822016	#N/A	0			6822016
682	2017	6822017	江苏省	江苏	江苏2017	2.48491	0.0210849	曲之萍	6822017曲之萍	独立董事	1		房立棠	6822017房立棠	独立董事	1	0	王清刚	6822017王清刚	董事会秘书	0			6822017	#N/A	0			6822017	#N/A	0			6822017	#N/A	0			6822017	#N/A	0			6822017	#N/A	0			6822017
682	2018	6822018	江苏省	江苏	江苏2018	2.56495	0.0202007	曲之萍	6822018曲之萍	独立董事	1		房立棠	6822018房立棠	独立董事	1	0	于新伟	6822018于新伟	董事	0			6822018	#N/A	0			6822018	#N/A	0			6822018	#N/A	0			6822018	#N/A	0			6822018	#N/A	0			6822018
682	2020	6822020	江苏省	江苏	江苏2020	3.17805	0.0181944	曲之萍	6822020曲之萍	独立董事	1		房立棠	6822020房立棠	独立董事	1	0		6822020	#N/A	0			6822020	#N/A	0			6822020	#N/A	0			6822020	#N/A	0			6822020	#N/A	0			6822020	#N/A	0			6822020
683	2014	6832014	内蒙古自治区	内蒙古	内蒙古2014	#N/A	0.0235136	孙燕红	6832014孙燕红	独立董事	1		白颐	6832014白颐	独立董事	1	0	张振华	6832014张振华	独立董事	1	0	梁润彪	6832014梁润彪	董事,总经理	0		吴爱国	6832014吴爱国	董事,副总经理	0			6832014	#N/A	0			6832014	#N/A	0			6832014	#N/A	0			6832014
683	2017	6832017	内蒙古自治区	内蒙古	内蒙古2017	3.89182	0.0212675	隋景祥	6832017隋景祥	独立董事	1		王勇	6832017王勇	独立董事	1	0	韩俊琴	6832017韩俊琴	独立董事	1	0	梁润彪	6832017梁润彪	董事,总经理	0		戴继锋	6832017戴继锋	董事,副总经理	0			6832017	#N/A	0			6832017	#N/A	0			6832017	#N/A	0			6832017
683	2018	6832018	内蒙古自治区	内蒙古	内蒙古2018	2.56495	0.0207708	隋景祥	6832018隋景祥	独立董事	1		王勇	6832018王勇	独立董事	1	0	韩俊琴	6832018韩俊琴	独立董事	1	0	梁润彪	6832018梁润彪	董事,总经理	0		戴继锋	6832018戴继锋	董事,副总经理	0			6832018	#N/A	0			6832018	#N/A	0			6832018	#N/A	0			6832018
683	2019	6832019	内蒙古自治区	内蒙古	内蒙古2019	1.38629	0.0234838	隋景祥	6832019隋景祥	独立董事	1		王勇	6832019王勇	独立董事	1	0	韩俊琴	6832019韩俊琴	独立董事	1	0	梁润彪	6832019梁润彪	董事,总经理	0		戴继锋	6832019戴继锋	董事,副总经理	0		彭丽	6832019彭丽	董事	0			6832019	#N/A	0			6832019	#N/A	0			6832019
686	2022	6862022	吉林省	吉林	吉林2022	7.55381	0.0171712	崔军	6862022崔军	独立董事	1		汪文生	6862022汪文生	独立董事	1	0	张洪东	6862022张洪东	非独立董事	0			6862022	#N/A	0			6862022	#N/A	0			6862022	#N/A	0			6862022	#N/A	0			6862022	#N/A	0			6862022
688	2014	6882014	吉林省	吉林	吉林2014	#N/A	0.0156277	郭喜明	6882014郭喜明	独立董事	1		冉来明	6882014冉来明	独立董事	1	0	姚新华	6882014姚新华	独立董事	1	0	刘榕	6882014刘榕	董事,副总经理	0		董剑平	6882014董剑平	董事,副董事长	0			6882014	#N/A	0			6882014	#N/A	0			6882014	#N/A	0			6882014
688	2015	6882015	吉林省	吉林	吉林2015	#N/A	0.0166667	郭喜明	6882015郭喜明	独立董事	1		冉来明	6882015冉来明	独立董事	1	0	姚新华	6882015姚新华	独立董事	1	0	刘榕	6882015刘榕	董事,副总经理	0		董剑平	6882015董剑平	副董事长,副总经理	0			6882015	#N/A	0			6882015	#N/A	0			6882015	#N/A	0			6882015
688	2016	6882016	吉林省	吉林	吉林2016	#N/A	0.0143369	郭喜明	6882016郭喜明	独立董事	1		姚新华	6882016姚新华	独立董事	1	0	冉来明	6882016冉来明	独立董事	1	0	夏勇	6882016夏勇	董事,总经理	0		刘榕	6882016刘榕	董事,副总经理	0			6882016	#N/A	0			6882016	#N/A	0			6882016	#N/A	0			6882016
692	2010	6922010	广东省	广东	广东2010	#N/A	0.0216352	孙杰	6922010孙杰	董事长,党委书记	0		刘继伟	6922010刘继伟	独立董事	1	0	石英	6922010石英	独立董事	1	0		6922010	#N/A	0			6922010	#N/A	0			6922010	#N/A	0			6922010	#N/A	0			6922010	#N/A	0			6922010
692	2011	6922011	广东省	广东	广东2011	#N/A	0.0199093	孙杰	6922011孙杰	董事长,党委书记	0		刘继伟	6922011刘继伟	独立董事	1	0	石英	6922011石英	独立董事	1	0		6922011	#N/A	0			6922011	#N/A	0			6922011	#N/A	0			6922011	#N/A	0			6922011	#N/A	0			6922011
697	2011	6972011	陕西省	陕西	陕西2011	1.38629	0.0187523	马西牛	6972011马西牛	独立董事	1		何雁明	6972011何雁明	独立董事	1	0	赵卫军	6972011赵卫军	董事,董事会秘书	0			6972011	#N/A	0			6972011	#N/A	0			6972011	#N/A	0			6972011	#N/A	0			6972011	#N/A	0			6972011
697	2022	6972022	陕西省	陕西	陕西2022	8.42705	0.0189251	李秉祥	6972022李秉祥	独立董事	1	1	金宝长	6972022金宝长	独立董事	1	0	赵卫军	6972022赵卫军	董事,副总经理,董事会秘书	0			6972022	#N/A	0			6972022	#N/A	0			6972022	#N/A	0			6972022	#N/A	0			6972022	#N/A	0			6972022
698	2013	6982013	陕西省	陕西	陕西2013	3.09104	0.0200614	钟田丽	6982013钟田丽	独立董事	1		王大壮	6982013王大壮	董事长	0		王毅	6982013王毅	董事,总会计师	0		李国运	6982013李国运	独立董事	1	0	齐法滋	6982013齐法滋	独立董事	1	0		6982013	#N/A	0			6982013	#N/A	0			6982013	#N/A	0			6982013
701	2013	7012013	福建省	福建	福建2013	#N/A	0.0214459	欧阳哲	7012013欧阳哲	董事,常务副总经理	0		卢永华	7012013卢永华	独立董事	1	0	陈芃	7012013陈芃	独立董事	1	0		7012013	#N/A	0			7012013	#N/A	0			7012013	#N/A	0			7012013	#N/A	0			7012013	#N/A	0			7012013
703	2017	7032017	广西壮族自治区	广西	广西2017	2.48491	0.0176567	周琪	7032017周琪	独立董事	1	1	贾路桥	7032017贾路桥	独立董事	1	0	贺强	7032017贺强	独立董事	1	0	高勤红	7032017高勤红	董事	0		朱菊珍	7032017朱菊珍	财务总监	0			7032017	#N/A	0			7032017	#N/A	0			7032017	#N/A	0			7032017
703	2021	7032021	广西壮族自治区	广西	广西2021	8.27589	0.013782	杨柏樟	7032021杨柏樟	独立董事	1		陈三联	7032021陈三联	独立董事	1	0	杨柳勇	7032021杨柳勇	独立董事	1	0	楼剑常	7032021楼剑常	非独立董事,副总裁	0		毛应	7032021毛应	非独立董事,财务总监,副总经理	0			7032021	#N/A	0			7032021	#N/A	0			7032021	#N/A	0			7032021
705	2018	7052018	广西壮族自治区	广西	广西2018	3.17805	0.016389	邢小玲	7052018邢小玲	独立董事	1		吕军	7052018吕军	董事长	0		程幸福	7052018程幸福	独立董事	1	0		7052018	#N/A	0			7052018	#N/A	0			7052018	#N/A	0			7052018	#N/A	0			7052018	#N/A	0			7052018
705	2021	7052021	广西壮族自治区	广西	广西2021	8.27589	0.013782	邢小玲	7052021邢小玲	独立董事	1		陈云伟	7052021陈云伟	董事长	0		程幸福	7052021程幸福	独立董事	1	0		7052021	#N/A	0			7052021	#N/A	0			7052021	#N/A	0			7052021	#N/A	0			7052021	#N/A	0			7052021
707	2015	7072015	湖北省	湖北	湖北2015	1.79176	0.0190792	张拥军	7072015张拥军	董事,董事会秘书	0		王远璋	7072015王远璋	独立董事	1	0	张拥军	7072015张拥军	董事,董事会秘书	0			7072015	#N/A	0			7072015	#N/A	0			7072015	#N/A	0			7072015	#N/A	0			7072015	#N/A	0			7072015
707	2018	7072018	湖北省	湖北	湖北2018	3.61092	0.0218442	包晓岚	7072018包晓岚	独立董事	1		孙燕萍	7072018孙燕萍	独立董事	1	1	王花曼	7072018王花曼	独立董事	1	0		7072018	#N/A	0			7072018	#N/A	0			7072018	#N/A	0			7072018	#N/A	0			7072018	#N/A	0			7072018
707	2020	7072020	湖北省	湖北	湖北2020	3.3673	0.0139769	包晓岚	7072020包晓岚	独立董事	1			7072020	#N/A	0		王花曼	7072020王花曼	独立董事	1	0		7072020	#N/A	0			7072020	#N/A	0			7072020	#N/A	0			7072020	#N/A	0			7072020	#N/A	0			7072020
709	2010	7092010	河北省	河北	河北2010	#N/A	0.0137727	陈金城	7092010陈金城	独立董事	1		翁宇庆	7092010翁宇庆	独立董事	1	0	郭振英	7092010郭振英	独立董事	1	0	张凯	7092010张凯	董事	0		田志平	7092010田志平	董事	0			7092010	#N/A	0			7092010	#N/A	0			7092010	#N/A	0			7092010
709	2021	7092021	河北省	河北	河北2021	9.17181	0.0219136	马莉	7092021马莉	独立董事	1		高栋章	7092021高栋章	独立董事	1	0	张玉柱	7092021张玉柱	独立董事	1	0	常广申	7092021常广申	非独立董事,总会计师	0		许斌	7092021许斌	副董事长,总经理	0			7092021	#N/A	0			7092021	#N/A	0			7092021	#N/A	0			7092021
710	2010	7102010	河北省	河北	河北2010	#N/A	0.0137727	余海宗	7102010余海宗	独立董事	1		赵泽松	7102010赵泽松	独立董事	1	0	邱辉祥	7102010邱辉祥	董事	0			7102010	#N/A	0			7102010	#N/A	0			7102010	#N/A	0			7102010	#N/A	0			7102010	#N/A	0			7102010
710	2011	7102011	河北省	河北	河北2011	#N/A	0.0173327	余海宗	7102011余海宗	独立董事	1		赵泽松	7102011赵泽松	独立董事	1	0	邱辉祥	7102011邱辉祥	董事	0			7102011	#N/A	0			7102011	#N/A	0			7102011	#N/A	0			7102011	#N/A	0			7102011	#N/A	0			7102011
710	2017	7102017	河北省	河北	河北2017	2.3979	0.0248665	曾廷敏	7102017曾廷敏	独立董事	1		程宏伟	7102017程宏伟	独立董事	1	0	邱辉祥	7102017邱辉祥	董事	0			7102017	#N/A	0			7102017	#N/A	0			7102017	#N/A	0			7102017	#N/A	0			7102017	#N/A	0			7102017
710	2018	7102018	河北省	河北	河北2018	3.29584	0.0267334	侯颖	7102018侯颖	董事,副总经理	0		王秀萍	7102018王秀萍	独立董事	1	0	李广超	7102018李广超	独立董事	1	0		7102018	#N/A	0			7102018	#N/A	0			7102018	#N/A	0			7102018	#N/A	0			7102018	#N/A	0			7102018
710	2022	7102022	河北省	河北	河北2022	9.16587	0.0223254	李广超	7102022李广超	独立董事	1	1	王秀萍	7102022王秀萍	独立董事	1	0	侯颖	7102022侯颖	董事,副总经理	0			7102022	#N/A	0			7102022	#N/A	0			7102022	#N/A	0			7102022	#N/A	0			7102022	#N/A	0			7102022
710	2023	7102023	河北省	河北	河北2023	9.04157	#N/A	李广超	7102023李广超	独立董事	1		王秀萍	7102023王秀萍	独立董事	1	0	侯颖	7102023侯颖	董事,副总经理	0			7102023	#N/A	0			7102023	#N/A	0			7102023	#N/A	0			7102023	#N/A	0			7102023	#N/A	0			7102023
712	2012	7122012	河北省	河北	河北2012	0.693147	0.0192798	黄伟成	7122012黄伟成	独立董事	1		谢军	7122012谢军	独立董事	1	0	丑建忠	7122012丑建忠	独立董事	1	0	张丹丹	7122012张丹丹	董事,副总经理,董事会秘书	0			7122012	#N/A	0			7122012	#N/A	0			7122012	#N/A	0			7122012	#N/A	0			7122012
712	2014	7122014	河北省	河北	河北2014	0.693147	0.025686	黄伟成	7122014黄伟成	#N/A	0		谢军	7122014谢军	独立董事	1	0	丑建忠	7122014丑建忠	独立董事	1	0	张丹丹	7122014张丹丹	董事,副总经理,董事会秘书	0			7122014	#N/A	0			7122014	#N/A	0			7122014	#N/A	0			7122014	#N/A	0			7122014
712	2016	7122016	河北省	河北	河北2016	#N/A	0.0292976	谢军	7122016谢军	独立董事	1		姚作为	7122016姚作为	独立董事	1	0	张丹丹	7122016张丹丹	董事,副总经理,董事会秘书	0			7122016	#N/A	0			7122016	#N/A	0			7122016	#N/A	0			7122016	#N/A	0			7122016	#N/A	0			7122016
712	2022	7122022	广东省	广东	广东2022	9.96857	0.0155058	汤海鹏	7122022汤海鹏	独立董事	1		聂织锦	7122022聂织锦	独立董事	1	1	王天广	7122022王天广	副董事长	0			7122022	#N/A	0			7122022	#N/A	0			7122022	#N/A	0			7122022	#N/A	0			7122022	#N/A	0			7122022
712	2023	7122023	广东省	广东	广东2023	9.88283	#N/A	汤海鹏	7122023汤海鹏	独立董事	1		聂织锦	7122023聂织锦	独立董事	1	1	王天广	7122023王天广	副董事长	0			7122023	#N/A	0			7122023	#N/A	0			7122023	#N/A	0			7122023	#N/A	0			7122023	#N/A	0			7122023
713	2020	7132020	广东省	广东	广东2020	2.83321	0.0174561	刘有鹏	7132020刘有鹏	独立董事	1		卓敏	7132020卓敏	独立董事	1	0	杨林	7132020杨林	董事长	0			7132020	#N/A	0			7132020	#N/A	0			7132020	#N/A	0			7132020	#N/A	0			7132020	#N/A	0			7132020
713	2021	7132021	广东省	广东	广东2021	9.67149	0.0144675	陈结淼	7132021陈结淼	独立董事	1		杨林	7132021杨林	董事长	0		朱丹	7132021朱丹	独立董事	1	0		7132021	#N/A	0			7132021	#N/A	0			7132021	#N/A	0			7132021	#N/A	0			7132021	#N/A	0			7132021
715	2011	7152011	广东省	广东	广东2011	#N/A	0.0199093	陈晋蓉	7152011陈晋蓉	独立董事	1		刘明辉	7152011刘明辉	独立董事	1	0	石英	7152011石英	独立董事	1	0	李文鹤	7152011李文鹤	董事	0		高仲	7152011高仲	董事	0			7152011	#N/A	0			7152011	#N/A	0			7152011	#N/A	0			7152011
715	2016	7152016	广东省	广东	广东2016	1.94591	0.0237664	姚海鑫	7152016姚海鑫	独立董事	1		赵希男	7152016赵希男	独立董事	1	0	吕伟顺	7152016吕伟顺	董事	0			7152016	#N/A	0			7152016	#N/A	0			7152016	#N/A	0			7152016	#N/A	0			7152016	#N/A	0			7152016
715	2017	7152017	广东省	广东	广东2017	2.70805	0.0163228	姚海鑫	7152017姚海鑫	独立董事	1		赵希男	7152017赵希男	独立董事	1	0	吕伟顺	7152017吕伟顺	董事	0			7152017	#N/A	0			7152017	#N/A	0			7152017	#N/A	0			7152017	#N/A	0			7152017	#N/A	0			7152017
715	2018	7152018	广东省	广东	广东2018	2.56495	0.0175543	姚海鑫	7152018姚海鑫	独立董事	1		赵希男	7152018赵希男	独立董事	1	0	吕伟顺	7152018吕伟顺	董事	0			7152018	#N/A	0			7152018	#N/A	0			7152018	#N/A	0			7152018	#N/A	0			7152018	#N/A	0			7152018
715	2019	7152019	广东省	广东	广东2019	2.77259	0.0140111	姚海鑫	7152019姚海鑫	独立董事	1		梁杰	7152019梁杰	独立董事	1	0	张尧志	7152019张尧志	董事	0			7152019	#N/A	0			7152019	#N/A	0			7152019	#N/A	0			7152019	#N/A	0			7152019	#N/A	0			7152019
717	2013	7172013	广东省	广东	广东2013	#N/A	0.0237707	刘焕泉	7172013刘焕泉	独立董事	1		陈青	7172013陈青	独立董事	1	0	王三武	7172013王三武	董事	0			7172013	#N/A	0			7172013	#N/A	0			7172013	#N/A	0			7172013	#N/A	0			7172013	#N/A	0			7172013
718	2019	7182019	吉林省	吉林	吉林2019	#N/A	0.0148473	吴斌	7182019吴斌	独立董事	1		周凯	7182019周凯	独立董事	1	0	李伟	7182019李伟	董事,副总裁	0			7182019	#N/A	0			7182019	#N/A	0			7182019	#N/A	0			7182019	#N/A	0			7182019	#N/A	0			7182019
719	2016	7192016	吉林省	吉林	吉林2016	#N/A	0.0143369	邢峥	7192016邢峥	独立董事	1		李永臻	7192016李永臻	董事长,董事	0		刘磊	7192016刘磊	董事	0		陈洁	7192016陈洁	独立董事	1	0	耿相新	7192016耿相新	董事,总编辑	0			7192016	#N/A	0			7192016	#N/A	0			7192016	#N/A	0			7192016
720	2014	7202014	山东省	山东	山东2014	3.97029	0.0191943	李玉明	7202014李玉明	独立董事	1		孙金民	7202014孙金民	董事	0		王乐锦	7202014王乐锦	独立董事	1	0		7202014	#N/A	0			7202014	#N/A	0			7202014	#N/A	0			7202014	#N/A	0			7202014	#N/A	0			7202014
721	2020	7212020	山东省	山东	山东2020	3.49651	0.0128581	李秉祥	7212020李秉祥	独立董事	1	1	李成	7212020李成	独立董事	1	0	梦蕾	7212020梦蕾	非独立董事,副总经理,董事会秘书	0			7212020	#N/A	0			7212020	#N/A	0			7212020	#N/A	0			7212020	#N/A	0			7212020	#N/A	0			7212020
721	2022	7212022	山东省	山东	山东2022	9.28952	0.0154946	李秉祥	7212022李秉祥	独立董事	1	1	李成	7212022李成	独立董事	1	0	梦蕾	7212022梦蕾	非独立董事,副总经理,董事会秘书	0			7212022	#N/A	0			7212022	#N/A	0			7212022	#N/A	0			7212022	#N/A	0			7212022	#N/A	0			7212022
722	2014	7222014	山东省	山东	山东2014	3.97029	0.0191943	黄忠国	7222014黄忠国	独立董事	1		谢朝斌	7222014谢朝斌	独立董事	1	0	罗丽娜	7222014罗丽娜	董事	0			7222014	#N/A	0			7222014	#N/A	0			7222014	#N/A	0			7222014	#N/A	0			7222014	#N/A	0			7222014
722	2018	7222018	山东省	山东	山东2018	2.3979	0.0165044	王小万	7222018王小万	独立董事	1		刘健	7222018刘健	党总支书记,董事,总裁	0		刘智清	7222018刘智清	独立董事	1	0		7222018	#N/A	0			7222018	#N/A	0			7222018	#N/A	0			7222018	#N/A	0			7222018	#N/A	0			7222018
723	2018	7232018	山西省	山西	山西2018	2.63906	0.021996	辛茂荀	7232018辛茂荀	独立董事	1		王丽珠	7232018王丽珠	独立董事	1	0	朱庆华	7232018朱庆华	副总经理,董事,董事会秘书	0			7232018	#N/A	0			7232018	#N/A	0			7232018	#N/A	0			7232018	#N/A	0			7232018	#N/A	0			7232018
723	2020	7232020	山西省	山西	山西2020	3.58352	0.0208904	王丽珠	7232020王丽珠	独立董事	1		李玉敏	7232020李玉敏	独立董事	1	0	朱庆华	7232020朱庆华	副总经理,董事,董事会秘书	0			7232020	#N/A	0			7232020	#N/A	0			7232020	#N/A	0			7232020	#N/A	0			7232020	#N/A	0			7232020
725	2012	7252012	北京市	北京	北京2012	#N/A	0.0180667	耿建新	7252012耿建新	独立董事	1	1	董安生	7252012董安生	独立董事	1	0	季国平	7252012季国平	独立董事	1	0	归静华	7252012归静华	董事	0			7252012	#N/A	0			7252012	#N/A	0			7252012	#N/A	0			7252012	#N/A	0			7252012
725	2020	7252020	北京市	北京	北京2020	2.3979	0.022133	王化成	7252020王化成	独立董事	1		唐守廉	7252020唐守廉	独立董事	1	0	宋杰	7252020宋杰	非独立董事	0		李轩	7252020李轩	独立董事	1	0	历彦涛	7252020历彦涛	非独立董事	0			7252020	#N/A	0			7252020	#N/A	0			7252020	#N/A	0			7252020
727	2010	7272010	山东省	山东	山东2010	#N/A	0.0142992	庄行方	7272010庄行方	独立董事	1		司云聪	7272010司云聪	董事,总经理	0		张晓兵	7272010张晓兵	独立董事	1	0		7272010	#N/A	0			7272010	#N/A	0			7272010	#N/A	0			7272010	#N/A	0			7272010	#N/A	0			7272010
727	2015	7272015	山东省	山东	山东2015	4.15888	0.0157355	庄行方	7272015庄行方	独立董事	1		司云聪	7272015司云聪	董事	0		王珏	7272015王珏	独立董事	1	0		7272015	#N/A	0			7272015	#N/A	0			7272015	#N/A	0			7272015	#N/A	0			7272015	#N/A	0			7272015
727	2018	7272018	山东省	山东	山东2018	2.3979	0.0165044	林雷	7272018林雷	独立董事	1		戴克勤	7272018戴克勤	独立董事	1	0	周贵祥	7272018周贵祥	董事长	0			7272018	#N/A	0			7272018	#N/A	0			7272018	#N/A	0			7272018	#N/A	0			7272018	#N/A	0			7272018
729	2010	7292010	北京市	北京	北京2010	0.693147	0.0194632	陈英丽	7292010陈英丽	独立董事	1		丁广学	7292010丁广学	董事,副总经理	0		莫湘筠	7292010莫湘筠	独立董事	1	0		7292010	#N/A	0			7292010	#N/A	0			7292010	#N/A	0			7292010	#N/A	0			7292010	#N/A	0			7292010
732	2011	7322011	福建省	福建	福建2011	0.693147	0.0172949	任真	7322011任真	独立董事	1		张白	7322011张白	独立董事	1	0	洪波	7322011洪波	独立董事	1	0		7322011	#N/A	0			7322011	#N/A	0			7322011	#N/A	0			7322011	#N/A	0			7322011	#N/A	0			7322011
735	2012	7352012	贵州省	贵州	贵州2012	#N/A	0.0127451	徐自力	7352012徐自力	董事长	0		刘新	7352012刘新	独立董事	1	0	徐俊峰	7352012徐俊峰	独立董事	1	0		7352012	#N/A	0			7352012	#N/A	0			7352012	#N/A	0			7352012	#N/A	0			7352012	#N/A	0			7352012
735	2013	7352013	海南省	海南	海南2013	#N/A	0.0180755	童光明	7352013童光明	独立董事	1		徐自力	7352013徐自力	董事长	0		陈日进	7352013陈日进	独立董事	1	0		7352013	#N/A	0			7352013	#N/A	0			7352013	#N/A	0			7352013	#N/A	0			7352013	#N/A	0			7352013
735	2015	7352015	海南省	海南	海南2015	1.09861	0.0187469	童光明	7352015童光明	独立董事	1		徐自力	7352015徐自力	董事长	0		陈日进	7352015陈日进	独立董事	1	0		7352015	#N/A	0			7352015	#N/A	0			7352015	#N/A	0			7352015	#N/A	0			7352015	#N/A	0			7352015
735	2018	7352018	海南省	海南	海南2018	5.04986	0.0227186	徐自力	7352018徐自力	董事长	0		朱辉	7352018朱辉	独立董事	1	0	蔡东宏	7352018蔡东宏	独立董事	1	0		7352018	#N/A	0			7352018	#N/A	0			7352018	#N/A	0			7352018	#N/A	0			7352018	#N/A	0			7352018
735	2019	7352019	海南省	海南	海南2019	4.80402	0.0182518	徐自力	7352019徐自力	董事长	0		朱辉	7352019朱辉	独立董事	1	0	蔡东宏	7352019蔡东宏	独立董事	1	0		7352019	#N/A	0			7352019	#N/A	0			7352019	#N/A	0			7352019	#N/A	0			7352019	#N/A	0			7352019
736	2012	7362012	海南省	海南	海南2012	#N/A	0.0139008	刘红宇	7362012刘红宇	独立董事	1		李树	7362012李树	独立董事	1	0	刘洪跃	7362012刘洪跃	独立董事	1	0		7362012	#N/A	0			7362012	#N/A	0			7362012	#N/A	0			7362012	#N/A	0			7362012	#N/A	0			7362012
738	2018	7382018	江苏省	江苏	江苏2018	2.56495	0.0202007	李冬梅	7382018李冬梅	独立董事	1		王立维	7382018王立维	独立董事	1	0	朱静波	7382018朱静波	董事,总经理	0			7382018	#N/A	0			7382018	#N/A	0			7382018	#N/A	0			7382018	#N/A	0			7382018	#N/A	0			7382018
739	2010	7392010	江苏省	江苏	江苏2010	#N/A	0.0213009	胡天高	7392010胡天高	董事	0		蒋岳祥	7392010蒋岳祥	董事	0		潘伟光	7392010潘伟光	独立董事	1	0	徐文财	7392010徐文财	董事长	0		张红英	7392010张红英	独立董事	1	0		7392010	#N/A	0			7392010	#N/A	0			7392010	#N/A	0			7392010
739	2015	7392015	江苏省	江苏	江苏2015	#N/A	0.0237915	姚明龙	7392015姚明龙	独立董事	1		徐文财	7392015徐文财	董事长	0		张淼洪	7392015张淼洪	独立董事	1	0	潘亚岚	7392015潘亚岚	独立董事	1	0	胡天高	7392015胡天高	董事	0			7392015	#N/A	0			7392015	#N/A	0			7392015	#N/A	0			7392015
739	2018	7392018	浙江省	浙江	浙江2018	1.79176	0.0193728	张爱珠	7392018张爱珠	独立董事	1		吴兴	7392018吴兴	董事	0		祝方猛	7392018祝方猛	董事长,总经理	0		姚明龙	7392018姚明龙	独立董事	1	0	张淼洪	7392018张淼洪	独立董事	1	0		7392018	#N/A	0			7392018	#N/A	0			7392018	#N/A	0			7392018
739	2019	7392019	浙江省	浙江	浙江2019	4.81218	0.0120027	张爱珠	7392019张爱珠	独立董事	1		吴兴	7392019吴兴	董事	0		祝方猛	7392019祝方猛	董事长,总经理	0		姚明龙	7392019姚明龙	独立董事	1	0	张淼洪	7392019张淼洪	独立董事	1	0		7392019	#N/A	0			7392019	#N/A	0			7392019	#N/A	0			7392019
739	2022	7392022	浙江省	浙江	浙江2022	9.81263	0.013772	钱娟萍	7392022钱娟萍	独立董事	1		祝方猛	7392022祝方猛	董事长	0		陈凌	7392022陈凌	独立董事	1	0	吴兴	7392022吴兴	董事	0		潘伟光	7392022潘伟光	独立董事	1	0		7392022	#N/A	0			7392022	#N/A	0			7392022	#N/A	0			7392022
739	2023	7392023	浙江省	浙江	浙江2023	9.74326	#N/A	钱娟萍	7392023钱娟萍	独立董事	1		祝方猛	7392023祝方猛	董事长	0		陈凌	7392023陈凌	独立董事	1	0	吴兴	7392023吴兴	董事	0		潘伟光	7392023潘伟光	独立董事	1	0		7392023	#N/A	0			7392023	#N/A	0			7392023	#N/A	0			7392023
748	2012	7482012	浙江省	浙江	浙江2012	#N/A	0.019422	胡国柳	7482012胡国柳	独立董事	1		蒋永明	7482012蒋永明	#N/A	0		陈彰清	7482012陈彰清	独立董事	1	0	李铁生	7482012李铁生	独立董事	1	0	吴群	7482012吴群	董事	0			7482012	#N/A	0			7482012	#N/A	0			7482012	#N/A	0			7482012
748	2014	7482014	浙江省	浙江	浙江2014	#N/A	0.0278689	余新培	7482014余新培	独立董事	1		武士国	7482014武士国	独立董事	1	0	张玉川	7482014张玉川	独立董事	1	0	蒋爱国	7482014蒋爱国	董事,副总经理	0		朱姗姗	7482014朱姗姗	董事	0			7482014	#N/A	0			7482014	#N/A	0			7482014	#N/A	0			7482014
751	2016	7512016	广西壮族自治区	广西	广西2016	1.60944	0.0209049	郑登渝	7512016郑登渝	独立董事	1		张廷安	7512016张廷安	独立董事	1	0	李文弟	7512016李文弟	董事	0			7512016	#N/A	0			7512016	#N/A	0			7512016	#N/A	0			7512016	#N/A	0			7512016	#N/A	0			7512016
751	2020	7512020	广西壮族自治区	广西	广西2020	2.48491	0.0142643	郑登渝	7512020郑登渝	独立董事	1		张廷安	7512020张廷安	独立董事	1	0	李文弟	7512020李文弟	董事	0			7512020	#N/A	0			7512020	#N/A	0			7512020	#N/A	0			7512020	#N/A	0			7512020	#N/A	0			7512020
752	2012	7522012	广西壮族自治区	广西	广西2012	#N/A	0.0186416	王迪迪	7522012王迪迪	独立董事	1		刘琪	7522012刘琪	董事	0		魏晓刚	7522012魏晓刚	董事,财务总监	0			7522012	#N/A	0			7522012	#N/A	0			7522012	#N/A	0			7522012	#N/A	0			7522012	#N/A	0			7522012
756	2022	7562022	福建省	福建	福建2022	8.42858	0.0129832		7562022	#N/A	0			7562022	#N/A	0			7562022	#N/A	0			7562022	#N/A	0			7562022	#N/A	0			7562022	#N/A	0			7562022	#N/A	0			7562022	#N/A	0			7562022
759	2014	7592014	湖北省	湖北	湖北2014	0.693147	0.0215722	唐建新	7592014唐建新	独立董事	1		汪海粟	7592014汪海粟	独立董事	1	0	艾娇	7592014艾娇	董事	0		李源	7592014李源	董事	0		陈志清	7592014陈志清	独立董事	1	0		7592014	#N/A	0			7592014	#N/A	0			7592014	#N/A	0			7592014
759	2018	7592018	湖北省	湖北	湖北2018	3.61092	0.0218442	刘启亮	7592018刘启亮	独立董事	1		朱新蓉	7592018朱新蓉	独立董事	1	0	马全丽	7592018马全丽	非独立董事	0		程军	7592018程军	非独立董事,副总经理	0		孙晋	7592018孙晋	独立董事	1	0		7592018	#N/A	0			7592018	#N/A	0			7592018	#N/A	0			7592018
760	2020	7602020	湖北省	湖北	湖北2020	3.3673	0.0139769	王德建	7602020王德建	独立董事	1		吴振平	7602020吴振平	独立董事	1	0	匡爱民	7602020匡爱民	独立董事	1	0	张杰	7602020张杰	非独立董事,董事会秘书(代理)	0			7602020	#N/A	0			7602020	#N/A	0			7602020	#N/A	0			7602020	#N/A	0			7602020
761	2017	7612017	辽宁省	辽宁	辽宁2017	1.09861	0.0147987	钟田丽	7612017钟田丽	独立董事	1		金永利	7612017金永利	独立董事	1	0	曹爱民	7612017曹爱民	董事,副董事长	0			7612017	#N/A	0			7612017	#N/A	0			7612017	#N/A	0			7612017	#N/A	0			7612017	#N/A	0			7612017
762	2011	7622011	西藏自治区	西藏	西藏2011	#N/A	0.0242181	牟文	7622011牟文	独立董事	1		甘启义	7622011甘启义	独立董事	1	0	陈荣发	7622011陈荣发	董事	0			7622011	#N/A	0			7622011	#N/A	0			7622011	#N/A	0			7622011	#N/A	0			7622011	#N/A	0			7622011
766	2012	7662012	西藏自治区	西藏	西藏2012	#N/A	0.0150318	赵微	7662012赵微	独立董事	1		吴成玉	7662012吴成玉	董事,副总经理	0		陈启斌	7662012陈启斌	独立董事	1	0		7662012	#N/A	0			7662012	#N/A	0			7662012	#N/A	0			7662012	#N/A	0			7662012	#N/A	0			7662012
768	2011	7682011	陕西省	陕西	陕西2011	1.38629	0.0187523	王伟雄	7682011王伟雄	独立董事	1		强力	7682011强力	独立董事	1	0	冯根福	7682011冯根福	独立董事	1	0	杨毅辉	7682011杨毅辉	董事	0		宋水云	7682011宋水云	董事	0			7682011	#N/A	0			7682011	#N/A	0			7682011	#N/A	0			7682011
768	2015	7682015	陕西省	陕西	陕西2015	5.05625	0.0196002	田高良	7682015田高良	独立董事	1		杨秀云	7682015杨秀云	独立董事	1	0	杨为乔	7682015杨为乔	独立董事	1	0	王斌	7682015王斌	董事	0		姜伟	7682015姜伟	董事	0			7682015	#N/A	0			7682015	#N/A	0			7682015	#N/A	0			7682015
768	2019	7682019	陕西省	陕西	陕西2019	7.01121	0.0163819	李玉萍	7682019李玉萍	独立董事	1		杨秀云	7682019杨秀云	独立董事	1	0	杨为乔	7682019杨为乔	独立董事	1	0	罗继德	7682019罗继德	董事,总会计师	0		庄仁敏	7682019庄仁敏	董事	0			7682019	#N/A	0			7682019	#N/A	0			7682019	#N/A	0			7682019
778	2010	7782010	河北省	河北	河北2010	#N/A	0.0137727	张建平	7782010张建平	独立董事	1		刘燕	7782010刘燕	独立董事	1	0	孟福利	7782010孟福利	董事	0			7782010	#N/A	0			7782010	#N/A	0			7782010	#N/A	0			7782010	#N/A	0			7782010	#N/A	0			7782010
778	2018	7782018	河北省	河北	河北2018	3.29584	0.0267334	闫华红	7782018闫华红	独立董事	1		郑玉春	7782018郑玉春	独立董事	1	0	孟福利	7782018孟福利	董事	0			7782018	#N/A	0			7782018	#N/A	0			7782018	#N/A	0			7782018	#N/A	0			7782018	#N/A	0			7782018
779	2020	7792020	河北省	河北	河北2020	4.85203	0.0220907	王金贵	7792020王金贵	独立董事	1		马明	7792020马明	党委副书记,董事,总经理	0		张虹	7792020张虹	董事	0		李宗义	7792020李宗义	独立董事	1	0	万红波	7792020万红波	独立董事	1	0		7792020	#N/A	0			7792020	#N/A	0			7792020	#N/A	0			7792020
782	2017	7822017	河北省	河北	河北2017	2.3979	0.0248665	李汉国	7822017李汉国	独立董事	1		袁红林	7822017袁红林	独立董事	1	0	孙磊	7822017孙磊	董事	0		杨燚	7822017杨燚	独立董事	1	0		7822017	#N/A	0			7822017	#N/A	0			7822017	#N/A	0			7822017	#N/A	0			7822017
785	2013	7852013	湖北省	湖北	湖北2013	0.693147	0.0141928	唐建新	7852013唐建新	独立董事	1		易国华	7852013易国华	董事,副总经理,董事会秘书	0		李光	7852013李光	独立董事	1	0		7852013	#N/A	0			7852013	#N/A	0			7852013	#N/A	0			7852013	#N/A	0			7852013	#N/A	0			7852013
785	2020	7852020	湖北省	湖北	湖北2020	3.3673	0.0139769	王峰娟	7852020王峰娟	独立董事	1		陈健	7852020陈健	独立董事	1	0	陈亮	7852020陈亮	非独立董事,副总裁	0		霍焱	7852020霍焱	非独立董事	0			7852020	#N/A	0			7852020	#N/A	0			7852020	#N/A	0			7852020	#N/A	0			7852020
789	2010	7892010	北京市	北京	北京2010	0.693147	0.0194632	王金本	7892010王金本	独立董事	1		晏国哲	7892010晏国哲	董事	0		黄新建	7892010黄新建	独立董事	1	0		7892010	#N/A	0			7892010	#N/A	0			7892010	#N/A	0			7892010	#N/A	0			7892010	#N/A	0			7892010
789	2014	7892014	北京市	北京	北京2014	#N/A	0.0259314	王金本	7892014王金本	独立董事	1		晏国哲	7892014晏国哲	董事	0		王芸	7892014王芸	独立董事	1	0		7892014	#N/A	0			7892014	#N/A	0			7892014	#N/A	0			7892014	#N/A	0			7892014	#N/A	0			7892014
791	2012	7912012	北京市	北京	北京2012	#N/A	0.0180667	郭虎成	7912012郭虎成	财务总监	0		胡秀琴	7912012胡秀琴	独立董事	1	0	刘钊	7912012刘钊	独立董事	1	0		7912012	#N/A	0			7912012	#N/A	0			7912012	#N/A	0			7912012	#N/A	0			7912012	#N/A	0			7912012
791	2015	7912015	北京市	北京	北京2015	0.693147	0.0241708	万红波	7912015万红波	独立董事	1		赵近元	7912015赵近元	独立董事	1	0	傅丽蓉	7912015傅丽蓉	董事	0			7912015	#N/A	0			7912015	#N/A	0			7912015	#N/A	0			7912015	#N/A	0			7912015	#N/A	0			7912015
791	2017	7912017	北京市	北京	北京2017	#N/A	0.0270469	万红波	7912017万红波	独立董事	1		赵近元	7912017赵近元	独立董事	1	0	陆平	7912017陆平	董事	0			7912017	#N/A	0			7912017	#N/A	0			7912017	#N/A	0			7912017	#N/A	0			7912017	#N/A	0			7912017
791	2018	7912018	北京市	北京	北京2018	1.79176	0.028059	万红波	7912018万红波	独立董事	1		赵近元	7912018赵近元	独立董事	1	0	陆平	7912018陆平	董事	0			7912018	#N/A	0			7912018	#N/A	0			7912018	#N/A	0			7912018	#N/A	0			7912018	#N/A	0			7912018
791	2023	7912023	北京市	北京	北京2023	7.79934	#N/A	李青标	7912023李青标	非独立董事	0		方文彬	7912023方文彬	独立董事	1	0	曹斌	7912023曹斌	独立董事	1	0		7912023	#N/A	0			7912023	#N/A	0			7912023	#N/A	0			7912023	#N/A	0			7912023	#N/A	0			7912023
792	2010	7922010	青海省	青海	青海2010	#N/A	0.030195	董德敏	7922010董德敏	独立董事	1		任萱	7922010任萱	#N/A	0		唐德新	7922010唐德新	董事,副总经理,总会计师	0		王天恒	7922010王天恒	独立董事	1	0	张全明	7922010张全明	#N/A	0		程友海	7922010程友海	独立董事	1	0		7922010	#N/A	0		王建军	7922010王建军	独立董事	1	0		7922010
792	2011	7922011	青海省	青海	青海2011	#N/A	0.0193121	安平绥	7922011安平绥	董事长	0		李小松	7922011李小松	董事,总裁,总工程师	0		王建军	7922011王建军	独立董事	1	0	任萱	7922011任萱	独立董事	1	0	王富贵	7922011王富贵	独立董事	1	0		7922011	#N/A	0			7922011	#N/A	0			7922011	#N/A	0			7922011
792	2021	7922021	青海省	青海	青海2021	8.05389	0.0235772	王建玲	7922021王建玲	独立董事	1		贠红卫	7922021贠红卫	董事长	0		王祥文	7922021王祥文	董事,总裁,副总裁,财务负责人	0		高健	7922021高健	董事	0		吴立新	7922021吴立新	独立董事	1	0	洪乐	7922021洪乐	独立董事	1	0		7922021	#N/A	0		王孝峰	7922021王孝峰	独立董事	1	0		7922021
792	2022	7922022	青海省	青海	青海2022	8.01533	0.0290257	王建玲	7922022王建玲	独立董事	1		贠红卫	7922022贠红卫	董事长	0		王祥文	7922022王祥文	董事,总裁,财务负责人	0		高健	7922022高健	董事	0		吴立新	7922022吴立新	独立董事	1	0	洪乐	7922022洪乐	独立董事	1	0		7922022	#N/A	0		王孝峰	7922022王孝峰	独立董事	1	0		7922022
795	2010	7952010	海南省	海南	海南2010	#N/A	0.0195746	张红英	7952010张红英	独立董事	1		蒋岳祥	7952010蒋岳祥	独立董事	1	0	王宝英	7952010王宝英	独立董事	1	0	徐文财	7952010徐文财	董事	0		杜建奎	7952010杜建奎	董事长	0			7952010	#N/A	0			7952010	#N/A	0			7952010	#N/A	0			7952010
795	2011	7952011	海南省	海南	海南2011	#N/A	0.0137672	张红英	7952011张红英	独立董事	1		蒋岳祥	7952011蒋岳祥	独立董事	1	0	王宝英	7952011王宝英	独立董事	1	0	徐文财	7952011徐文财	董事	0		杜建奎	7952011杜建奎	董事长	0			7952011	#N/A	0			7952011	#N/A	0			7952011	#N/A	0			7952011
796	2010	7962010	海南省	海南	海南2010	#N/A	0.0195746	胡东山	7962010胡东山	独立董事	1		霍学喜	7962010霍学喜	独立董事	1	0	白永秀	7962010白永秀	独立董事	1	0	艾兆元	7962010艾兆元	常务副总裁	0		辛笛	7962010辛笛	董事	0			7962010	#N/A	0			7962010	#N/A	0			7962010	#N/A	0			7962010
796	2011	7962011	海南省	海南	海南2011	#N/A	0.0137672	胡东山	7962011胡东山	独立董事	1		霍学喜	7962011霍学喜	独立董事	1	0	白永秀	7962011白永秀	独立董事	1	0	雍大勇	7962011雍大勇	董事,总裁	0		周勇	7962011周勇	董事,财务总监	0			7962011	#N/A	0			7962011	#N/A	0			7962011	#N/A	0			7962011
796	2012	7962012	海南省	海南	海南2012	#N/A	0.0139008	胡东山	7962012胡东山	独立董事	1		霍学喜	7962012霍学喜	独立董事	1	0	白永秀	7962012白永秀	独立董事	1	0	李少飞	7962012李少飞	董事,总裁	0		陈滔	7962012陈滔	董事,财务总监	0			7962012	#N/A	0			7962012	#N/A	0			7962012	#N/A	0			7962012
796	2013	7962013	海南省	海南	海南2013	#N/A	0.0180755	胡东山	7962013胡东山	独立董事	1		霍学喜	7962013霍学喜	独立董事	1	0	魏锦才	7962013魏锦才	独立董事	1	0	田力维	7962013田力维	董事长	0		陈滔	7962013陈滔	财务总监,董事	0			7962013	#N/A	0			7962013	#N/A	0			7962013	#N/A	0			7962013
796	2014	7962014	海南省	海南	海南2014	#N/A	0.0172445	胡东山	7962014胡东山	独立董事	1		霍学喜	7962014霍学喜	独立董事	1	0	魏锦才	7962014魏锦才	独立董事	1	0	何家福	7962014何家福	董事,董事长,总裁	0		李少飞	7962014李少飞	副总经理,董事	0			7962014	#N/A	0			7962014	#N/A	0			7962014	#N/A	0			7962014
799	2012	7992012	湖南省	湖南	湖南2012	0.693147	0.018989	付磊	7992012付磊	独立董事	1		郭国庆	7992012郭国庆	独立董事	1	0	夏心国	7992012夏心国	总经理,执行董事	0			7992012	#N/A	0			7992012	#N/A	0			7992012	#N/A	0			7992012	#N/A	0			7992012	#N/A	0			7992012
799	2013	7992013	湖南省	湖南	湖南2013	1.09861	0.0222391	付磊	7992013付磊	独立董事	1		郭国庆	7992013郭国庆	独立董事	1	0	夏心国	7992013夏心国	执行董事,总经理	0			7992013	#N/A	0			7992013	#N/A	0			7992013	#N/A	0			7992013	#N/A	0			7992013	#N/A	0			7992013
800	2023	8002023	吉林省	吉林	吉林2023	7.61283	#N/A	毛志宏	8002023毛志宏	独立董事	1		韩方明	8002023韩方明	独立董事	1	0	刘延昌	8002023刘延昌	非独立董事	0			8002023	#N/A	0			8002023	#N/A	0			8002023	#N/A	0			8002023	#N/A	0			8002023	#N/A	0			8002023
802	2010	8022010	吉林省	吉林	吉林2010	#N/A	0.0126162	王广鹏	8022010王广鹏	独立董事	1		邵浩	8022010邵浩	独立董事	1	0	王奇之	8022010王奇之	独立董事	1	0		8022010	#N/A	0			8022010	#N/A	0			8022010	#N/A	0			8022010	#N/A	0			8022010	#N/A	0			8022010
803	2018	8032018	吉林省	吉林	吉林2018	#N/A	0.0223398	杨金珍	8032018杨金珍	董事	0		何云	8032018何云	独立董事	1	1	王敏	8032018王敏	独立董事	1	0		8032018	#N/A	0			8032018	#N/A	0			8032018	#N/A	0			8032018	#N/A	0			8032018	#N/A	0			8032018
805	2011	8052011	吉林省	吉林	吉林2011	#N/A	0.0131013	张国和	8052011张国和	独立董事	1		胡约翰	8052011胡约翰	独立董事	1	0	李世界	8052011李世界	董事,财务总监,副总经理	0			8052011	#N/A	0			8052011	#N/A	0			8052011	#N/A	0			8052011	#N/A	0			8052011	#N/A	0			8052011
809	2010	8092010	云南省	云南	云南2010	#N/A	0.0145235	毛洪涛	8092010毛洪涛	独立董事	1		辜明安	8092010辜明安	独立董事	1	0	覃绍强	8092010覃绍强	董事,副总经理,财务总监	0			8092010	#N/A	0			8092010	#N/A	0			8092010	#N/A	0			8092010	#N/A	0			8092010	#N/A	0			8092010
809	2017	8092017	云南省	云南	云南2017	3.09104	0.0173975	季丰	8092017季丰	独立董事	1		王萍	8092017王萍	独立董事	1	0	李海旭	8092017李海旭	董事	0			8092017	#N/A	0			8092017	#N/A	0			8092017	#N/A	0			8092017	#N/A	0			8092017	#N/A	0			8092017
810	2023	8102023	四川省	四川	四川2023	9.25043	#N/A	彭宁	8102023彭宁	独立董事	1		白华	8102023白华	独立董事	1	1	张知	8102023张知	非独立董事,常务副总经理,董事会秘书	0		马少平	8102023马少平	独立董事	1	0	应一鸣	8102023应一鸣	非独立董事	0			8102023	#N/A	0			8102023	#N/A	0			8102023	#N/A	0			8102023
811	2012	8112012	四川省	四川	四川2012	#N/A	0.0142473	吕永祥	8112012吕永祥	独立董事	1	1	樊高定	8112012樊高定	独立董事	1	1	杨利	8112012杨利	独立董事	1	0	于元波	8112012于元波	董事长	0		张春凯	8112012张春凯	董事	0			8112012	#N/A	0			8112012	#N/A	0			8112012	#N/A	0			8112012
811	2013	8112013	四川省	四川	四川2013	#N/A	0.0157208	吕永祥	8112013吕永祥	独立董事	1	1	樊高定	8112013樊高定	独立董事	1	1	杨利	8112013杨利	独立董事	1	0	于元波	8112013于元波	董事长	0		张春凯	8112013张春凯	董事	0			8112013	#N/A	0			8112013	#N/A	0			8112013	#N/A	0			8112013
811	2015	8112015	四川省	四川	四川2015	0.693147	0.0208623	赵起高	8112015赵起高	独立董事	1		郭明瑞	8112015郭明瑞	独立董事	1	0	张朝晖	8112015张朝晖	独立董事	1	1	李增群	8112015李增群	董事长	0		张春凯	8112015张春凯	#N/A	0			8112015	#N/A	0			8112015	#N/A	0			8112015	#N/A	0			8112015
811	2016	8112016	四川省	四川	四川2016	0.693147	0.0172122	赵起高	8112016赵起高	独立董事	1			8112016	#N/A	0		张朝晖	8112016张朝晖	独立董事	1	1	李增群	8112016李增群	董事长	0		张春凯	8112016张春凯	#N/A	0			8112016	#N/A	0			8112016	#N/A	0			8112016	#N/A	0			8112016
811	2018	8112018	四川省	四川	四川2018	3.17805	0.0199863	赵起高	8112018赵起高	独立董事	1		史卫进	8112018史卫进	独立董事	1	0	张朝晖	8112018张朝晖	独立董事	1	1	李增群	8112018李增群	董事长	0		高峰	8112018高峰	董事	0			8112018	#N/A	0			8112018	#N/A	0			8112018	#N/A	0			8112018
811	2019	8112019	四川省	四川	四川2019	2.70805	0.0202815	赵起高	8112019赵起高	独立董事	1		史卫进	8112019史卫进	独立董事	1	0	张朝晖	8112019张朝晖	独立董事	1	1	李增群	8112019李增群	董事长	0		高峰	8112019高峰	董事	0			8112019	#N/A	0			8112019	#N/A	0			8112019	#N/A	0			8112019
811	2020	8112020	四川省	四川	四川2020	3.43399	0.0165098	高峰	8112020高峰	董事	0		柳喜军	8112020柳喜军	独立董事	1	0	陈伟	8112020陈伟	独立董事	1	0	李增群	8112020李增群	董事长	0		步延东	8112020步延东	独立董事	1	0		8112020	#N/A	0			8112020	#N/A	0			8112020	#N/A	0			8112020
811	2022	8112022	四川省	四川	四川2022	9.14452	0.0177539		8112022	#N/A	0		柳喜军	8112022柳喜军	独立董事	1	0	陈伟	8112022陈伟	独立董事	1	0	李增群	8112022李增群	董事长	0		步延东	8112022步延东	独立董事	1	0		8112022	#N/A	0			8112022	#N/A	0			8112022	#N/A	0			8112022
811	2023	8112023	四川省	四川	四川2023	9.25043	#N/A	陈伟	8112023陈伟	独立董事	1		柳喜军	8112023柳喜军	独立董事	1	0	杨元桂	8112023杨元桂	董事	0		李增群	8112023李增群	董事长	0		步延东	8112023步延东	独立董事	1	0		8112023	#N/A	0			8112023	#N/A	0			8112023	#N/A	0			8112023
812	2010	8122010	四川省	四川	四川2010	#N/A	0.0155318	李祥军	8122010李祥军	独立董事	1		李禄安	8122010李禄安	独立董事	1	0	张曼军	8122010张曼军	董事局副主席	0			8122010	#N/A	0			8122010	#N/A	0			8122010	#N/A	0			8122010	#N/A	0			8122010	#N/A	0			8122010
812	2011	8122011	四川省	四川	四川2011	#N/A	0.0171572	李祥军	8122011李祥军	独立董事	1		李禄安	8122011李禄安	独立董事	1	0	张曼军	8122011张曼军	董事局副主席	0			8122011	#N/A	0			8122011	#N/A	0			8122011	#N/A	0			8122011	#N/A	0			8122011	#N/A	0			8122011
812	2012	8122012	四川省	四川	四川2012	#N/A	0.0142473	李祥军	8122012李祥军	独立董事	1		李禄安	8122012李禄安	独立董事	1	0	张曼军	8122012张曼军	董事局副主席	0			8122012	#N/A	0			8122012	#N/A	0			8122012	#N/A	0			8122012	#N/A	0			8122012	#N/A	0			8122012
812	2013	8122013	陕西省	陕西	陕西2013	3.09104	0.0200614	刘书锦	8122013刘书锦	独立董事	1		聂鹏民	8122013聂鹏民	独立董事	1	0	赵天骄	8122013赵天骄	董事,副总裁	0			8122013	#N/A	0			8122013	#N/A	0			8122013	#N/A	0			8122013	#N/A	0			8122013	#N/A	0			8122013
812	2014	8122014	陕西省	陕西	陕西2014	3.71357	0.0225423	刘书锦	8122014刘书锦	独立董事	1		聂鹏民	8122014聂鹏民	独立董事	1	0	赵天骄	8122014赵天骄	董事,副总裁	0			8122014	#N/A	0			8122014	#N/A	0			8122014	#N/A	0			8122014	#N/A	0			8122014	#N/A	0			8122014
813	2017	8132017	陕西省	陕西	陕西2017	6.01372	0.0175059	郇绍奎	8132017郇绍奎	独立董事	1		杜业松	8132017杜业松	董事,董事会秘书	0		张宇锋	8132017张宇锋	独立董事	1	0		8132017	#N/A	0			8132017	#N/A	0			8132017	#N/A	0			8132017	#N/A	0			8132017	#N/A	0			8132017
813	2023	8132023	陕西省	陕西	陕西2023	8.50127	#N/A	孙卫红	8132023孙卫红	独立董事	1		韩峰	8132023韩峰	非独立董事	0		王新安	8132023王新安	独立董事	1	1		8132023	#N/A	0			8132023	#N/A	0			8132023	#N/A	0			8132023	#N/A	0			8132023	#N/A	0			8132023
815	2017	8152017	宁夏回族自治区	宁夏	宁夏2017	#N/A	0.0142763	王玉涛	8152017王玉涛	独立董事	1		张小盟	8152017张小盟	独立董事	1	0	刘岩	8152017刘岩	董事	0			8152017	#N/A	0			8152017	#N/A	0			8152017	#N/A	0			8152017	#N/A	0			8152017	#N/A	0			8152017
815	2022	8152022	宁夏回族自治区	宁夏	宁夏2022	7.46908	0.0208817	王玉涛	8152022王玉涛	独立董事	1		王新	8152022王新	#N/A	0		吴登峰	8152022吴登峰	董事	0			8152022	#N/A	0			8152022	#N/A	0			8152022	#N/A	0			8152022	#N/A	0			8152022	#N/A	0			8152022
816	2020	8162020	宁夏回族自治区	宁夏	宁夏2020	0.693147	0.0205823	滕晓梅	8162020滕晓梅	独立董事	1		王国良	8162020王国良	独立董事	1	0	王乃强	8162020王乃强	董事,副总经理	0			8162020	#N/A	0			8162020	#N/A	0			8162020	#N/A	0			8162020	#N/A	0			8162020	#N/A	0			8162020
818	2018	8182018	宁夏回族自治区	宁夏	宁夏2018	1.09861	0.0225042	郭海兰	8182018郭海兰	独立董事	1		吴志坚	8182018吴志坚	独立董事	1	0	刘春彦	8182018刘春彦	独立董事	1	0	蔡卫东	8182018蔡卫东	董事长,总经理	0			8182018	#N/A	0			8182018	#N/A	0			8182018	#N/A	0			8182018	#N/A	0			8182018
819	2023	8192023	湖南省	湖南	湖南2023	9.98898	#N/A	彭翰	8192023彭翰	独立董事	1		易辉	8192023易辉	非独立董事	0		何翼云	8192023何翼云	独立董事	1	1		8192023	#N/A	0			8192023	#N/A	0			8192023	#N/A	0			8192023	#N/A	0			8192023	#N/A	0			8192023
821	2012	8212012	湖南省	湖南	湖南2012	0.693147	0.018989	孙友元	8212012孙友元	董事长	0		尹光志	8212012尹光志	独立董事	1	0	余玉苗	8212012余玉苗	独立董事	1	0		8212012	#N/A	0			8212012	#N/A	0			8212012	#N/A	0			8212012	#N/A	0			8212012	#N/A	0			8212012
822	2017	8222017	湖南省	湖南	湖南2017	3.71357	0.0163375	于长春	8222017于长春	独立董事	1		方勇	8222017方勇	董事长	0		高明芹	8222017高明芹	独立董事	1	0		8222017	#N/A	0			8222017	#N/A	0			8222017	#N/A	0			8222017	#N/A	0			8222017	#N/A	0			8222017
826	2012	8262012	湖北省	湖北	湖北2012	#N/A	0.019097	郭新平	8262012郭新平	独立董事	1		胡新灵	8262012胡新灵	副董事长,总经理	0		张书廷	8262012张书廷	独立董事	1	1		8262012	#N/A	0			8262012	#N/A	0			8262012	#N/A	0			8262012	#N/A	0			8262012	#N/A	0			8262012
828	2010	8282010	湖北省	湖北	湖北2010	#N/A	0.0200518	王启波	8282010王启波	副董事长	0		林波	8282010林波	董事	0		李善民	8282010李善民	独立董事	1	0	王宝林	8282010王宝林	独立董事	1	0	李非	8282010李非	独立董事	1	0		8282010	#N/A	0			8282010	#N/A	0			8282010	#N/A	0			8282010
828	2011	8282011	湖北省	湖北	湖北2011	#N/A	0.0221201	王启波	8282011王启波	副董事长	0		林波	8282011林波	董事	0		李善民	8282011李善民	独立董事	1	0	李非	8282011李非	独立董事	1	0	吴向能	8282011吴向能	独立董事	1	0		8282011	#N/A	0			8282011	#N/A	0			8282011	#N/A	0			8282011
829	2014	8292014	江西省	江西	江西2014	#N/A	0.0211756	刘雪生	8292014刘雪生	独立董事	1		吴强	8292014吴强	董事	0		魏炜	8292014魏炜	独立董事	1	0		8292014	#N/A	0			8292014	#N/A	0			8292014	#N/A	0			8292014	#N/A	0			8292014	#N/A	0			8292014
830	2013	8302013	山东省	山东	山东2013	2.3979	0.0191595	李广源	8302013李广源	独立董事	1		白颐	8302013白颐	独立董事	1	0	蔡英强	8302013蔡英强	董事,副总经理,董事会秘书	0			8302013	#N/A	0			8302013	#N/A	0			8302013	#N/A	0			8302013	#N/A	0			8302013	#N/A	0			8302013
831	2022	8312022	山西省	山西	山西2022	8.85481	0.0206246	胡燕	8312022胡燕	独立董事	1		王涛	8312022王涛	非独立董事	0		邓楚平	8312022邓楚平	董事	0		栾政明	8312022栾政明	独立董事	1	0		8312022	#N/A	0			8312022	#N/A	0			8312022	#N/A	0			8312022	#N/A	0			8312022
835	2019	8352019	山西省	山西	山西2019	3.13549	0.0191373	王良成	8352019王良成	独立董事	1		武兴田	8352019武兴田	独立董事	1	0	徐柏其	8352019徐柏其	独立董事	1	0		8352019	#N/A	0			8352019	#N/A	0			8352019	#N/A	0			8352019	#N/A	0			8352019	#N/A	0			8352019
837	2016	8372016	山西省	山西	山西2016	0.693147	0.0223427	吴晓光	8372016吴晓光	独立董事	1	1	刘劲	8372016刘劲	独立董事	1	0	刘万超	8372016刘万超	非独立董事,财务总监	0			8372016	#N/A	0			8372016	#N/A	0			8372016	#N/A	0			8372016	#N/A	0			8372016	#N/A	0			8372016
839	2014	8392014	北京市	北京	北京2014	#N/A	0.0259314	郑力	8392014郑力	独立董事	1		罗宁	8392014罗宁	董事长	0		秦永忠	8392014秦永忠	董事	0		王兴	8392014王兴	独立董事	1	0	傅亮	8392014傅亮	独立董事	1	0		8392014	#N/A	0			8392014	#N/A	0			8392014	#N/A	0			8392014
848	2010	8482010	北京市	北京	北京2010	0.693147	0.0194632	郭亚雄	8482010郭亚雄	独立董事	1		陈爱珍	8482010陈爱珍	独立董事	1	1	李兆军	8482010李兆军	董事,副总经理	0			8482010	#N/A	0			8482010	#N/A	0			8482010	#N/A	0			8482010	#N/A	0			8482010	#N/A	0			8482010
848	2012	8482012	北京市	北京	北京2012	#N/A	0.0180667	郭亚雄	8482012郭亚雄	独立董事	1		陈爱珍	8482012陈爱珍	独立董事	1	1	李兆军	8482012李兆军	董事,副总经理	0			8482012	#N/A	0			8482012	#N/A	0			8482012	#N/A	0			8482012	#N/A	0			8482012	#N/A	0			8482012
848	2013	8482013	北京市	北京	北京2013	#N/A	0.0228363	郭亚雄	8482013郭亚雄	独立董事	1	1	陈爱珍	8482013陈爱珍	独立董事	1	1	李兆军	8482013李兆军	董事,副总经理	0			8482013	#N/A	0			8482013	#N/A	0			8482013	#N/A	0			8482013	#N/A	0			8482013	#N/A	0			8482013
848	2014	8482014	北京市	北京	北京2014	#N/A	0.0259314	郭亚雄	8482014郭亚雄	独立董事	1	1	陈爱珍	8482014陈爱珍	独立董事	1	1	李兆军	8482014李兆军	董事,总经理,财务负责人	0			8482014	#N/A	0			8482014	#N/A	0			8482014	#N/A	0			8482014	#N/A	0			8482014	#N/A	0			8482014
848	2018	8482018	北京市	北京	北京2018	1.79176	0.028059	董国云	8482018董国云	独立董事	1		汪建明	8482018汪建明	独立董事	1	0	鲁永明	8482018鲁永明	董事长,总经理	0			8482018	#N/A	0			8482018	#N/A	0			8482018	#N/A	0			8482018	#N/A	0			8482018	#N/A	0			8482018
848	2020	8482020	北京市	北京	北京2020	2.3979	0.022133	董国云	8482020董国云	独立董事	1		汪建明	8482020汪建明	独立董事	1	0	鲁永明	8482020鲁永明	董事	0			8482020	#N/A	0			8482020	#N/A	0			8482020	#N/A	0			8482020	#N/A	0			8482020	#N/A	0			8482020
848	2022	8482022	北京市	北京	北京2022	7.92588	0.0163973	汪建明	8482022汪建明	独立董事	1		李元龙	8482022李元龙	非独立董事	0		刘志刚	8482022刘志刚	非独立董事	0			8482022	#N/A	0			8482022	#N/A	0			8482022	#N/A	0			8482022	#N/A	0			8482022	#N/A	0			8482022
848	2023	8482023	北京市	北京	北京2023	7.79934	#N/A	汪建明	8482023汪建明	独立董事	1		李元龙	8482023李元龙	非独立董事	0		刘婷	8482023刘婷	独立董事	1	0		8482023	#N/A	0			8482023	#N/A	0			8482023	#N/A	0			8482023	#N/A	0			8482023	#N/A	0			8482023
850	2016	8502016	北京市	北京	北京2016	1.09861	0.0311098	王玉春	8502016王玉春	独立董事	1		陈结淼	8502016陈结淼	独立董事	1	0	王章宏	8502016王章宏	财务总监	0			8502016	#N/A	0			8502016	#N/A	0			8502016	#N/A	0			8502016	#N/A	0			8502016	#N/A	0			8502016
850	2021	8502021	北京市	北京	北京2021	8.1588	0.0239643	储育明	8502021储育明	独立董事	1		王章宏	8502021王章宏	董事,财务总监	0		管亚梅	8502021管亚梅	独立董事	1	0		8502021	#N/A	0			8502021	#N/A	0			8502021	#N/A	0			8502021	#N/A	0			8502021	#N/A	0			8502021
851	2010	8512010	北京市	北京	北京2010	0.693147	0.0194632	张天西	8512010张天西	独立董事	1		张翼志	8512010张翼志	独立董事	1	0	蔡荣生	8512010蔡荣生	独立董事	1	0		8512010	#N/A	0			8512010	#N/A	0			8512010	#N/A	0			8512010	#N/A	0			8512010	#N/A	0			8512010
851	2013	8512013	北京市	北京	北京2013	#N/A	0.0228363	张晓岚	8512013张晓岚	独立董事	1		孙琪	8512013孙琪	独立董事	1	0	蔡荣生	8512013蔡荣生	独立董事	1	0		8512013	#N/A	0			8512013	#N/A	0			8512013	#N/A	0			8512013	#N/A	0			8512013	#N/A	0			8512013
852	2011	8522011	湖北省	湖北	湖北2011	#N/A	0.0221201	詹伟哉	8522011詹伟哉	独立董事	1		王震	8522011王震	独立董事	1	0	张茂顺	8522011张茂顺	董事	0			8522011	#N/A	0			8522011	#N/A	0			8522011	#N/A	0			8522011	#N/A	0			8522011	#N/A	0			8522011
852	2012	8522012	湖北省	湖北	湖北2012	#N/A	0.019097	詹伟哉	8522012詹伟哉	独立董事	1		王震	8522012王震	独立董事	1	0	张茂顺	8522012张茂顺	董事	0			8522012	#N/A	0			8522012	#N/A	0			8522012	#N/A	0			8522012	#N/A	0			8522012	#N/A	0			8522012
852	2017	8522017	湖北省	湖北	湖北2017	2.3979	0.021246	潘同文	8522017潘同文	独立董事	1		黄振中	8522017黄振中	独立董事	1	1	张卫东	8522017张卫东	董事	0			8522017	#N/A	0			8522017	#N/A	0			8522017	#N/A	0			8522017	#N/A	0			8522017	#N/A	0			8522017
852	2019	8522019	湖北省	湖北	湖北2019	3.63759	0.0196924	潘同文	8522019潘同文	独立董事	1		吴杰	8522019吴杰	独立董事	1	0	张卫东	8522019张卫东	董事	0			8522019	#N/A	0			8522019	#N/A	0			8522019	#N/A	0			8522019	#N/A	0			8522019	#N/A	0			8522019
852	2023	8522023	湖北省	湖北	湖北2023	9.08795	#N/A	周京平	8522023周京平	独立董事	1		吴杰	8522023吴杰	独立董事	1	0	张锦宏	8522023张锦宏	非独立董事	0			8522023	#N/A	0			8522023	#N/A	0			8522023	#N/A	0			8522023	#N/A	0			8522023	#N/A	0			8522023
856	2016	8562016	湖北省	湖北	湖北2016	2.70805	0.0187492	陈嘉庚	8562016陈嘉庚	#N/A	0		陈思	8562016陈思	#N/A	0		孙靖	8562016孙靖	#N/A	0		孙淑英	8562016孙淑英	#N/A	0		王甲兴	8562016王甲兴	#N/A	0		董进会	8562016董进会	#N/A	0			8562016	#N/A	0			8562016	#N/A	0			8562016
856	2017	8562017	湖北省	湖北	湖北2017	2.3979	0.021246	朱岩	8562017朱岩	董事	0		苏宏业	8562017苏宏业	独立董事	1	0	岳殿民	8562017岳殿民	独立董事	1	0		8562017	#N/A	0			8562017	#N/A	0			8562017	#N/A	0			8562017	#N/A	0			8562017	#N/A	0			8562017
856	2019	8562019	湖北省	湖北	湖北2019	3.63759	0.0196924	岳殿民	8562019岳殿民	独立董事	1		蒋宝军	8562019蒋宝军	董事	0		王玉敏	8562019王玉敏	独立董事	1	0		8562019	#N/A	0			8562019	#N/A	0			8562019	#N/A	0			8562019	#N/A	0			8562019	#N/A	0			8562019
858	2017	8582017	四川省	四川	四川2017	0.693147	0.0162732	干胜道	8582017干胜道	独立董事	1		刘中国	8582017刘中国	党委副书记,董事长	0		李曙光	8582017李曙光	董事	0		傅南平	8582017傅南平	独立董事	1	0	周友苏	8582017周友苏	独立董事	1	0		8582017	#N/A	0			8582017	#N/A	0			8582017	#N/A	0			8582017
858	2022	8582022	四川省	四川	四川2022	9.14452	0.0177539	许波	8582022许波	董事	0		吴越	8582022吴越	独立董事	1	0	侯水平	8582022侯水平	独立董事	1	0	曾从钦	8582022曾从钦	党委书记,董事长,董事	0		罗华伟	8582022罗华伟	独立董事	1	0		8582022	#N/A	0			8582022	#N/A	0			8582022	#N/A	0			8582022
858	2023	8582023	四川省	四川	四川2023	9.25043	#N/A	许波	8582023许波	董事	0		吴越	8582023吴越	独立董事	1	0	侯水平	8582023侯水平	独立董事	1	0	曾从钦	8582023曾从钦	党委书记,董事长	0		罗华伟	8582023罗华伟	独立董事	1	0		8582023	#N/A	0			8582023	#N/A	0			8582023	#N/A	0			8582023
859	2010	8592010	四川省	四川	四川2010	#N/A	0.0155318	朱丹	8592010朱丹	独立董事	1		强昌文	8592010强昌文	独立董事	1	0	周亚娜	8592010周亚娜	独立董事	1	0	钱军锋	8592010钱军锋	#N/A	0		李丰奎	8592010李丰奎	董事,副总经理	0			8592010	#N/A	0			8592010	#N/A	0			8592010	#N/A	0			8592010
859	2023	8592023	四川省	四川	四川2023	9.25043	#N/A	尹宗成	8592023尹宗成	独立董事	1		李鹏峰	8592023李鹏峰	独立董事	1	0	钱元美	8592023钱元美	董事	0			8592023	#N/A	0			8592023	#N/A	0			8592023	#N/A	0			8592023	#N/A	0			8592023	#N/A	0			8592023
860	2022	8602022	北京市	北京	北京2022	7.92588	0.0163973	鲁桂华	8602022鲁桂华	独立董事	1		徐猛	8602022徐猛	独立董事	1	0	李秋生	8602022李秋生	董事,总经理,副总经理,财务总监	0			8602022	#N/A	0			8602022	#N/A	0			8602022	#N/A	0			8602022	#N/A	0			8602022	#N/A	0			8602022
861	2017	8612017	广东省	广东	广东2017	2.70805	0.0163228	朱为绎	8612017朱为绎	独立董事	1		邵建明	8612017邵建明	董事长	0		慕丽娜	8612017慕丽娜	独立董事	1	0		8612017	#N/A	0			8612017	#N/A	0			8612017	#N/A	0			8612017	#N/A	0			8612017	#N/A	0			8612017
862	2011	8622011	广东省	广东	广东2011	#N/A	0.0199093	赵华威	8622011赵华威	独立董事	1		王幽深	8622011王幽深	独立董事	1	0	马桂玲	8622011马桂玲	董事	0			8622011	#N/A	0			8622011	#N/A	0			8622011	#N/A	0			8622011	#N/A	0			8622011	#N/A	0			8622011
862	2016	8622016	广东省	广东	广东2016	1.94591	0.0237664	李宗义	8622016李宗义	独立董事	1		黄爱学	8622016黄爱学	独立董事	1	0	马桂玲	8622016马桂玲	董事	0			8622016	#N/A	0			8622016	#N/A	0			8622016	#N/A	0			8622016	#N/A	0			8622016	#N/A	0			8622016
862	2017	8622017	广东省	广东	广东2017	2.70805	0.0163228	李宗义	8622017李宗义	独立董事	1		王幽深	8622017王幽深	独立董事	1	0	马建勋	8622017马建勋	非独立董事	0			8622017	#N/A	0			8622017	#N/A	0			8622017	#N/A	0			8622017	#N/A	0			8622017	#N/A	0			8622017
862	2019	8622019	广东省	广东	广东2019	2.77259	0.0140111	李宗义	8622019李宗义	独立董事	1		王幽深	8622019王幽深	独立董事	1	1	马建勋	8622019马建勋	非独立董事	0			8622019	#N/A	0			8622019	#N/A	0			8622019	#N/A	0			8622019	#N/A	0			8622019	#N/A	0			8622019
862	2020	8622020	广东省	广东	广东2020	2.83321	0.0174561	张有全	8622020张有全	独立董事	1		王幽深	8622020王幽深	独立董事	1	0	马建勋	8622020马建勋	非独立董事	0			8622020	#N/A	0			8622020	#N/A	0			8622020	#N/A	0			8622020	#N/A	0			8622020	#N/A	0			8622020
863	2017	8632017	广东省	广东	广东2017	2.70805	0.0163228	郭永清	8632017郭永清	独立董事	1		陈劲松	8632017陈劲松	董事	0		丁祖昱	8632017丁祖昱	独立董事	1	0		8632017	#N/A	0			8632017	#N/A	0			8632017	#N/A	0			8632017	#N/A	0			8632017	#N/A	0			8632017
868	2015	8682015	广东省	广东	广东2015	0.693147	0.0185536	周泽将	8682015周泽将	独立董事	1		王其东	8682015王其东	独立董事	1	0	李洪峰	8682015李洪峰	独立董事	1	0	王德龙	8682015王德龙	董事	0		李强	8682015李强	董事	0			8682015	#N/A	0			8682015	#N/A	0			8682015	#N/A	0			8682015
868	2016	8682016	广东省	广东	广东2016	1.94591	0.0237664	周泽将	8682016周泽将	独立董事	1		赵惠芳	8682016赵惠芳	独立董事	1	0	李洪峰	8682016李洪峰	独立董事	1	0	王德龙	8682016王德龙	董事	0		李强	8682016李强	董事	0			8682016	#N/A	0			8682016	#N/A	0			8682016	#N/A	0			8682016
868	2023	8682023	广东省	广东	广东2023	9.88283	#N/A	盛明泉	8682023盛明泉	独立董事	1		刘勇	8682023刘勇	董事,总经理,董事会秘书	0		钱立军	8682023钱立军	独立董事	1	0	杜鹏程	8682023杜鹏程	独立董事	1	0	蒋园园	8682023蒋园园	非独立董事	0			8682023	#N/A	0			8682023	#N/A	0			8682023	#N/A	0			8682023
875	2016	8752016	山东省	山东	山东2016	#N/A	0.0178275	韩景利	8752016韩景利	独立董事	1		陶新建	8752016陶新建	董事,董事长	0		谷大可	8752016谷大可	独立董事	1	0	于莹	8752016于莹	独立董事	1	0	周博潇	8752016周博潇	股东代表董事	0			8752016	#N/A	0			8752016	#N/A	0			8752016	#N/A	0			8752016
875	2019	8752019	山东省	山东	山东2019	3.21888	0.0146235	韩景利	8752019韩景利	独立董事	1		陶新建	8752019陶新建	#N/A	0		王义军	8752019王义军	独立董事	1	0	于莹	8752019于莹	独立董事	1	0	周博潇	8752019周博潇	股东代表董事	0			8752019	#N/A	0			8752019	#N/A	0			8752019	#N/A	0			8752019
875	2020	8752020	山东省	山东	山东2020	3.49651	0.0128581	韩景利	8752020韩景利	独立董事	1		刘毅勇	8752020刘毅勇	#N/A	0		周博潇	8752020周博潇	股东代表董事	0		于莹	8752020于莹	独立董事	1	0	王义军	8752020王义军	独立董事	1	0	才延福	8752020才延福	董事长,党委书记	0			8752020	#N/A	0			8752020	#N/A	0			8752020
877	2010	8772010	新疆维吾尔自治区	新疆	新疆2010	#N/A	0.0149081	李通林	8772010李通林	董事	0		彭友谊	8772010彭友谊	独立董事	1	0	赵成斌	8772010赵成斌	独立董事	1	0		8772010	#N/A	0			8772010	#N/A	0			8772010	#N/A	0			8772010	#N/A	0			8772010	#N/A	0			8772010
877	2013	8772013	新疆维吾尔自治区	新疆	新疆2013	#N/A	0.021692	赵成斌	8772013赵成斌	独立董事	1		边新俊	8772013边新俊	独立董事	1	0	李通林	8772013李通林	董事	0			8772013	#N/A	0			8772013	#N/A	0			8772013	#N/A	0			8772013	#N/A	0			8772013	#N/A	0			8772013
877	2014	8772014	新疆维吾尔自治区	新疆	新疆2014	1.94591	0.0208967	赵成斌	8772014赵成斌	独立董事	1		边新俊	8772014边新俊	独立董事	1	0	李通林	8772014李通林	董事	0			8772014	#N/A	0			8772014	#N/A	0			8772014	#N/A	0			8772014	#N/A	0			8772014	#N/A	0			8772014
877	2015	8772015	新疆维吾尔自治区	新疆	新疆2015	1.09861	0.018564	李薇	8772015李薇	独立董事	1		边新俊	8772015边新俊	独立董事	1	0	赵新军	8772015赵新军	董事,总裁	0			8772015	#N/A	0			8772015	#N/A	0			8772015	#N/A	0			8772015	#N/A	0			8772015	#N/A	0			8772015
878	2010	8782010	云南省	云南	云南2010	#N/A	0.0145235	朱庆芬	8782010朱庆芬	独立董事	1		杨国樑	8782010杨国樑	独立董事	1	0	汪戎	8782010汪戎	独立董事	1	0	金永静	8782010金永静	董事	0		李犁	8782010李犁	董事	0			8782010	#N/A	0			8782010	#N/A	0			8782010	#N/A	0			8782010
878	2011	8782011	云南省	云南	云南2011	#N/A	0.0210596	朱庆芬	8782011朱庆芬	独立董事	1		杨国樑	8782011杨国樑	独立董事	1	0	龙超	8782011龙超	独立董事	1	0	金永静	8782011金永静	董事	0		李犁	8782011李犁	董事	0			8782011	#N/A	0			8782011	#N/A	0			8782011	#N/A	0			8782011
878	2014	8782014	云南省	云南	云南2014	0.693147	0.0175228	余怒涛	8782014余怒涛	独立董事	1		龙超	8782014龙超	独立董事	1	0	杨先明	8782014杨先明	独立董事	1	0	田永忠	8782014田永忠	董事	0		李犁	8782014李犁	董事	0			8782014	#N/A	0			8782014	#N/A	0			8782014	#N/A	0			8782014
878	2020	8782020	云南省	云南	云南2020	3.3322	0.0143706	王勇	8782020王勇	独立董事	1		于定明	8782020于定明	独立董事	1	1	王冲	8782020王冲	副董事长,副总经理,非独立董事,总经理(代理)	1	0		8782020	#N/A	0			8782020	#N/A	0			8782020	#N/A	0			8782020	#N/A	0			8782020	#N/A	0			8782020
880	2017	8802017	云南省	云南	云南2017	3.09104	0.0173975		8802017	#N/A	0			8802017	#N/A	0			8802017	#N/A	0			8802017	#N/A	0			8802017	#N/A	0			8802017	#N/A	0			8802017	#N/A	0			8802017	#N/A	0			8802017
880	2020	8802020	云南省	云南	云南2020	3.3322	0.0143706		8802020	#N/A	0			8802020	#N/A	0			8802020	#N/A	0			8802020	#N/A	0			8802020	#N/A	0			8802020	#N/A	0			8802020	#N/A	0			8802020	#N/A	0			8802020
881	2016	8812016	辽宁省	辽宁	辽宁2016	0.693147	0.018763	张先治	8812016张先治	独立董事	1		王岩	8812016王岩	独立董事	1	0	陈荣辉	8812016陈荣辉	副董事长	0			8812016	#N/A	0			8812016	#N/A	0			8812016	#N/A	0			8812016	#N/A	0			8812016	#N/A	0			8812016
882	2010	8822010	辽宁省	辽宁	辽宁2010	#N/A	0.0159287	陈永宏	8822010陈永宏	独立董事	1		牛晓华	8822010牛晓华	董事,总经理	0		王文彦	8822010王文彦	独立董事	1	0		8822010	#N/A	0			8822010	#N/A	0			8822010	#N/A	0			8822010	#N/A	0			8822010	#N/A	0			8822010
882	2016	8822016	辽宁省	辽宁	辽宁2016	0.693147	0.018763	吴剑	8822016吴剑	独立董事	1		史泽友	8822016史泽友	独立董事	1	0	郭丽荣	8822016郭丽荣	董事	0			8822016	#N/A	0			8822016	#N/A	0			8822016	#N/A	0			8822016	#N/A	0			8822016	#N/A	0			8822016
885	2012	8852012	河南省	河南	河南2012	0.693147	0.0120192	朱永明	8852012朱永明	独立董事	1		杨钧	8852012杨钧	独立董事	1	0	李飞飞	8852012李飞飞	董事	0			8852012	#N/A	0			8852012	#N/A	0			8852012	#N/A	0			8852012	#N/A	0			8852012	#N/A	0			8852012
885	2014	8852014	河南省	河南	河南2014	2.3979	0.0182527	朱永明	8852014朱永明	独立董事	1		杨钧	8852014杨钧	独立董事	1	0	赵志勇	8852014赵志勇	董事	0			8852014	#N/A	0			8852014	#N/A	0			8852014	#N/A	0			8852014	#N/A	0			8852014	#N/A	0			8852014
885	2017	8852017	河南省	河南	河南2017	3.4012	0.0197107	李伟真	8852017李伟真	独立董事	1		杨钧	8852017杨钧	独立董事	1	0	王霞	8852017王霞	董事	0			8852017	#N/A	0			8852017	#N/A	0			8852017	#N/A	0			8852017	#N/A	0			8852017	#N/A	0			8852017
885	2018	8852018	河南省	河南	河南2018	4.46591	0.0189316	李伟真	8852018李伟真	独立董事	1		杨钧	8852018杨钧	独立董事	1	0	王霞	8852018王霞	董事	0			8852018	#N/A	0			8852018	#N/A	0			8852018	#N/A	0			8852018	#N/A	0			8852018	#N/A	0			8852018
887	2017	8872017	安徽省	安徽	安徽2017	3.43399	0.0173611	翟胜宝	8872017翟胜宝	独立董事	1		夏迎松	8872017夏迎松	副董事长,总经理	0		易善兵	8872017易善兵	董事,副总经理,财务总监	0			8872017	#N/A	0			8872017	#N/A	0			8872017	#N/A	0			8872017	#N/A	0			8872017	#N/A	0			8872017
887	2021	8872021	安徽省	安徽	安徽2021	9.33433	0.0165682	黄攸立	8872021黄攸立	独立董事	1		易善兵	8872021易善兵	董事,副总经理	0		翟胜宝	8872021翟胜宝	独立董事	1	0		8872021	#N/A	0			8872021	#N/A	0			8872021	#N/A	0			8872021	#N/A	0			8872021	#N/A	0			8872021
888	2012	8882012	安徽省	安徽	安徽2012	1.60944	0.0183712	邓德兵	8882012邓德兵	独立董事	1		赵明	8882012赵明	独立董事	1	0	邹志明	8882012邹志明	董事,总经理	0			8882012	#N/A	0			8882012	#N/A	0			8882012	#N/A	0			8882012	#N/A	0			8882012	#N/A	0			8882012
889	2019	8892019	安徽省	安徽	安徽2019	3.4012	0.0163229	郝振平	8892019郝振平	独立董事	1		徐小伍	8892019徐小伍	独立董事	1	0	刘宁	8892019刘宁	独立董事	1	0	卢小娟	8892019卢小娟	董事	0		柳攀	8892019柳攀	董事	0		刘一平	8892019刘一平	独立董事	1	0		8892019	#N/A	0			8892019	#N/A	0			8892019
889	2022	8892022	安徽省	安徽	安徽2022	9.34618	0.0160862	郝振平	8892022郝振平	独立董事	1		胡峰	8892022胡峰	独立董事	1	0	陈国平	8892022陈国平	非独立董事	0			8892022	#N/A	0			8892022	#N/A	0			8892022	#N/A	0			8892022	#N/A	0			8892022	#N/A	0			8892022
890	2015	8902015	安徽省	安徽	安徽2015	1.60944	0.0166536	李明辉	8902015李明辉	独立董事	1		蒋纬球	8902015蒋纬球	董事长,总经理	0		周辉	8902015周辉	独立董事	1	0		8902015	#N/A	0			8902015	#N/A	0			8902015	#N/A	0			8902015	#N/A	0			8902015	#N/A	0			8902015
890	2016	8902016	安徽省	安徽	安徽2016	3.2581	0.0221311	李明辉	8902016李明辉	独立董事	1		周辉	8902016周辉	独立董事	1	0	黄芳	8902016黄芳	非独立董事	0			8902016	#N/A	0			8902016	#N/A	0			8902016	#N/A	0			8902016	#N/A	0			8902016	#N/A	0			8902016
890	2017	8902017	安徽省	安徽	安徽2017	3.43399	0.0173611	李明辉	8902017李明辉	独立董事	1		周辉	8902017周辉	独立董事	1	0	黄芳	8902017黄芳	非独立董事	0			8902017	#N/A	0			8902017	#N/A	0			8902017	#N/A	0			8902017	#N/A	0			8902017	#N/A	0			8902017
890	2018	8902018	安徽省	安徽	安徽2018	2.3979	0.0204296	李明辉	8902018李明辉	独立董事	1		周辉	8902018周辉	独立董事	1	0	黄芳	8902018黄芳	非独立董事	0			8902018	#N/A	0			8902018	#N/A	0			8902018	#N/A	0			8902018	#N/A	0			8902018	#N/A	0			8902018
892	2013	8922013	安徽省	安徽	安徽2013	0.693147	0.0172233	何家盛	8922013何家盛	董事长	0		陈步林	8922013陈步林	独立董事	1	0	李敏	8922013李敏	独立董事	1	0		8922013	#N/A	0			8922013	#N/A	0			8922013	#N/A	0			8922013	#N/A	0			8922013	#N/A	0			8922013
892	2014	8922014	安徽省	安徽	安徽2014	1.38629	0.0192843	严玉康	8922014严玉康	独立董事	1		何家盛	8922014何家盛	董事长,董事	0		陈步林	8922014陈步林	独立董事	1	0		8922014	#N/A	0			8922014	#N/A	0			8922014	#N/A	0			8922014	#N/A	0			8922014	#N/A	0			8922014
892	2015	8922015	安徽省	安徽	安徽2015	1.60944	0.0166536	杨晓桐	8922015杨晓桐	董事长,董事	0		严玉康	8922015严玉康	独立董事	1	0	李敏	8922015李敏	独立董事	1	0		8922015	#N/A	0			8922015	#N/A	0			8922015	#N/A	0			8922015	#N/A	0			8922015	#N/A	0			8922015
893	2010	8932010	安徽省	安徽	安徽2010	0.693147	0.0148976	李洪斌	8932010李洪斌	独立董事	1		朱桂龙	8932010朱桂龙	独立董事	1	0	饶之隆	8932010饶之隆	董事,副总经理,财务总监	0			8932010	#N/A	0			8932010	#N/A	0			8932010	#N/A	0			8932010	#N/A	0			8932010	#N/A	0			8932010
893	2011	8932011	安徽省	安徽	安徽2011	0.693147	0.0177839	李洪斌	8932011李洪斌	独立董事	1		朱桂龙	8932011朱桂龙	独立董事	1	0	蒋艺	8932011蒋艺	董事	0			8932011	#N/A	0			8932011	#N/A	0			8932011	#N/A	0			8932011	#N/A	0			8932011	#N/A	0			8932011
893	2023	8932023	广东省	广东	广东2023	9.88283	#N/A	潘同文	8932023潘同文	独立董事	1		刘冰燕	8932023刘冰燕	非独立董事,副总经理,董事会秘书	0		杨运杰	8932023杨运杰	独立董事	1	0		8932023	#N/A	0			8932023	#N/A	0			8932023	#N/A	0			8932023	#N/A	0			8932023	#N/A	0			8932023
900	2010	9002010	湖南省	湖南	湖南2010	#N/A	0.0174859	江水波	9002010江水波	独立董事	1		宋伟杰	9002010宋伟杰	董事长	0		吴汉洪	9002010吴汉洪	独立董事	1	0		9002010	#N/A	0			9002010	#N/A	0			9002010	#N/A	0			9002010	#N/A	0			9002010	#N/A	0			9002010
901	2010	9012010	湖南省	湖南	湖南2010	#N/A	0.0174859	赵慧侠	9012010赵慧侠	独立董事	1		李志民	9012010李志民	独立董事	1	0	张彦文	9012010张彦文	副董事长	0			9012010	#N/A	0			9012010	#N/A	0			9012010	#N/A	0			9012010	#N/A	0			9012010	#N/A	0			9012010
902	2010	9022010	湖南省	湖南	湖南2010	#N/A	0.0174859	何煜南	9022010何煜南	董事	0		沈建林	9022010沈建林	独立董事	1	0	张承缨	9022010张承缨	独立董事	1	0		9022010	#N/A	0			9022010	#N/A	0			9022010	#N/A	0			9022010	#N/A	0			9022010	#N/A	0			9022010
903	2016	9032016	云南省	云南	云南2016	1.09861	0.0274382	张彤	9032016张彤	独立董事	1		楼狄明	9032016楼狄明	独立董事	1	0	孙灵芝	9032016孙灵芝	董事	0			9032016	#N/A	0			9032016	#N/A	0			9032016	#N/A	0			9032016	#N/A	0			9032016	#N/A	0			9032016
903	2023	9032023	云南省	云南	云南2023	8.08055	#N/A	苏红敏	9032023苏红敏	独立董事	1		羊亚平	9032023羊亚平	独立董事	1	1	王洪亮	9032023王洪亮	非独立董事	0			9032023	#N/A	0			9032023	#N/A	0			9032023	#N/A	0			9032023	#N/A	0			9032023	#N/A	0			9032023
905	2011	9052011	云南省	云南	云南2011	#N/A	0.0210596	傅元略	9052011傅元略	独立董事	1		邵哲平	9052011邵哲平	独立董事	1	0	倪路伦	9052011倪路伦	董事	0			9052011	#N/A	0			9052011	#N/A	0			9052011	#N/A	0			9052011	#N/A	0			9052011	#N/A	0			9052011
905	2012	9052012	云南省	云南	云南2012	0.693147	0.0156808	傅元略	9052012傅元略	独立董事	1		邵哲平	9052012邵哲平	独立董事	1	0	倪路伦	9052012倪路伦	董事	0			9052012	#N/A	0			9052012	#N/A	0			9052012	#N/A	0			9052012	#N/A	0			9052012	#N/A	0			9052012
905	2014	9052014	云南省	云南	云南2014	0.693147	0.0175228	傅元略	9052014傅元略	独立董事	1		王鸿鹏	9052014王鸿鹏	独立董事	1	0	杨宏图	9052014杨宏图	董事	0			9052014	#N/A	0			9052014	#N/A	0			9052014	#N/A	0			9052014	#N/A	0			9052014	#N/A	0			9052014
906	2016	9062016	云南省	云南	云南2016	1.09861	0.0274382	陈丹红	9062016陈丹红	独立董事	1		高凤龙	9062016高凤龙	独立董事	1	0	王辉	9062016王辉	董事	0			9062016	#N/A	0			9062016	#N/A	0			9062016	#N/A	0			9062016	#N/A	0			9062016	#N/A	0			9062016
908	2015	9082015	云南省	云南	云南2015	#N/A	0.0177368	赵强	9082015赵强	独立董事	1		沈义	9082015沈义	独立董事	1	0	简卫光	9082015简卫光	非独立董事,副总经理	0			9082015	#N/A	0			9082015	#N/A	0			9082015	#N/A	0			9082015	#N/A	0			9082015	#N/A	0			9082015
912	2010	9122010	云南省	云南	云南2010	#N/A	0.0145235	黄友	9122010黄友	独立董事	1		张忠	9122010张忠	独立董事	1	0	邹仲平	9122010邹仲平	董事,总经理	0			9122010	#N/A	0			9122010	#N/A	0			9122010	#N/A	0			9122010	#N/A	0			9122010	#N/A	0			9122010
912	2015	9122015	云南省	云南	云南2015	#N/A	0.0177368	杨勇	9122015杨勇	独立董事	1		聂长海	9122015聂长海	独立董事	1	0	赵永清	9122015赵永清	董事,总经理	0			9122015	#N/A	0			9122015	#N/A	0			9122015	#N/A	0			9122015	#N/A	0			9122015	#N/A	0			9122015
912	2017	9122017	云南省	云南	云南2017	3.09104	0.0173975	杨勇	9122017杨勇	独立董事	1		聂长海	9122017聂长海	独立董事	1	0	赵永清	9122017赵永清	董事,总经理	0		谢洪燕	9122017谢洪燕	独立董事	1	0		9122017	#N/A	0			9122017	#N/A	0			9122017	#N/A	0			9122017	#N/A	0			9122017
915	2012	9152012	云南省	云南	云南2012	0.693147	0.0156808	吕玉芹	9152012吕玉芹	独立董事	1		乔永军	9152012乔永军	董事,副总经理	0		江鲁	9152012江鲁	独立董事	1	0		9152012	#N/A	0			9152012	#N/A	0			9152012	#N/A	0			9152012	#N/A	0			9152012	#N/A	0			9152012
915	2013	9152013	云南省	云南	云南2013	1.60944	0.0179827	吕玉芹	9152013吕玉芹	独立董事	1		乔永军	9152013乔永军	董事,副总经理	0		江鲁	9152013江鲁	独立董事	1	0		9152013	#N/A	0			9152013	#N/A	0			9152013	#N/A	0			9152013	#N/A	0			9152013	#N/A	0			9152013
915	2018	9152018	云南省	云南	云南2018	2.63906	0.0209211	杜宁	9152018杜宁	独立董事	1		乔永军	9152018乔永军	董事,副总经理	0		邓岩	9152018邓岩	独立董事	1	0		9152018	#N/A	0			9152018	#N/A	0			9152018	#N/A	0			9152018	#N/A	0			9152018	#N/A	0			9152018
916	2014	9162014	云南省	云南	云南2014	0.693147	0.0175228		9162014	#N/A	0			9162014	#N/A	0			9162014	#N/A	0			9162014	#N/A	0			9162014	#N/A	0			9162014	#N/A	0			9162014	#N/A	0			9162014	#N/A	0			9162014
916	2015	9162015	云南省	云南	云南2015	#N/A	0.0177368		9162015	#N/A	0			9162015	#N/A	0			9162015	#N/A	0			9162015	#N/A	0			9162015	#N/A	0			9162015	#N/A	0			9162015	#N/A	0			9162015	#N/A	0			9162015
916	2016	9162016	云南省	云南	云南2016	1.09861	0.0274382		9162016	#N/A	0			9162016	#N/A	0			9162016	#N/A	0			9162016	#N/A	0			9162016	#N/A	0			9162016	#N/A	0			9162016	#N/A	0			9162016	#N/A	0			9162016
918	2012	9182012	湖南省	湖南	湖南2012	0.693147	0.018989	张旭良	9182012张旭良	独立董事	1		边华才	9182012边华才	党委书记,副董事长,总裁	0		岳意定	9182012岳意定	独立董事	1	0		9182012	#N/A	0			9182012	#N/A	0			9182012	#N/A	0			9182012	#N/A	0			9182012	#N/A	0			9182012
918	2014	9182014	湖南省	湖南	湖南2014	0.693147	0.020457	张旭良	9182014张旭良	独立董事	1		边华才	9182014边华才	董事长	0		黄廉熙	9182014黄廉熙	独立董事	1	0		9182014	#N/A	0			9182014	#N/A	0			9182014	#N/A	0			9182014	#N/A	0			9182014	#N/A	0			9182014
918	2016	9182016	湖南省	湖南	湖南2016	2.3979	0.0200848	李尊农	9182016李尊农	独立董事	1		任潮龙	9182016任潮龙	董事长	0		陈三联	9182016陈三联	独立董事	1	0		9182016	#N/A	0			9182016	#N/A	0			9182016	#N/A	0			9182016	#N/A	0			9182016	#N/A	0			9182016
918	2017	9182017	湖南省	湖南	湖南2017	3.71357	0.0163375	梁文昭	9182017梁文昭	独立董事	1		甄立涛	9182017甄立涛	董事长	0		陈三联	9182017陈三联	独立董事	1	0		9182017	#N/A	0			9182017	#N/A	0			9182017	#N/A	0			9182017	#N/A	0			9182017	#N/A	0			9182017
918	2018	9182018	湖南省	湖南	湖南2018	4.67283	0.0150218	梁文昭	9182018梁文昭	独立董事	1		甄立涛	9182018甄立涛	董事长	0		陈三联	9182018陈三联	独立董事	1	0		9182018	#N/A	0			9182018	#N/A	0			9182018	#N/A	0			9182018	#N/A	0			9182018	#N/A	0			9182018
918	2019	9182019	湖南省	湖南	湖南2019	5.95584	0.0183731	梁文昭	9182019梁文昭	独立董事	1		钱永华	9182019钱永华	董事长,总经理	0		陈三联	9182019陈三联	独立董事	1	0		9182019	#N/A	0			9182019	#N/A	0			9182019	#N/A	0			9182019	#N/A	0			9182019	#N/A	0			9182019
919	2011	9192011	湖南省	湖南	湖南2011	0.693147	0.0209581	刘爱莲	9192011刘爱莲	独立董事	1		徐伟民	9192011徐伟民	董事	0		李春敏	9192011李春敏	董事,总裁	0		李东	9192011李东	独立董事	1	0	邵蓉	9192011邵蓉	独立董事	1	0		9192011	#N/A	0			9192011	#N/A	0			9192011	#N/A	0			9192011
919	2018	9192018	湖南省	湖南	湖南2018	4.67283	0.0150218	冯巧根	9192018冯巧根	独立董事	1		梁玉堂	9192018梁玉堂	董事,总裁	0		汤卫国	9192018汤卫国	董事	0		王广基	9192018王广基	独立董事	1	0	郝德明	9192018郝德明	独立董事	1	0		9192018	#N/A	0			9192018	#N/A	0			9192018	#N/A	0			9192018
919	2019	9192019	湖南省	湖南	湖南2019	5.95584	0.0183731	冯巧根	9192019冯巧根	独立董事	1		梁玉堂	9192019梁玉堂	董事长,董事,总裁	0		汤卫国	9192019汤卫国	董事,常务副总裁	0		王广基	9192019王广基	独立董事	1	0	郝德明	9192019郝德明	独立董事	1	0		9192019	#N/A	0			9192019	#N/A	0			9192019	#N/A	0			9192019
919	2020	9192020	湖南省	湖南	湖南2020	6.28227	0.0176416	高燕萍	9192020高燕萍	独立董事	1		崔吉	9192020崔吉	非独立董事	0		沈永建	9192020沈永建	独立董事	1	0	王广基	9192020王广基	独立董事	1	0	梁玉堂	9192020梁玉堂	董事长,总裁	0			9192020	#N/A	0			9192020	#N/A	0			9192020	#N/A	0			9192020
922	2010	9222010	广东省	广东	广东2010	#N/A	0.0216352	戚勇	9222010戚勇	独立董事	1		阮永田	9222010阮永田	独立董事	1	0	张井彬	9222010张井彬	董事,总会计师	0			9222010	#N/A	0			9222010	#N/A	0			9222010	#N/A	0			9222010	#N/A	0			9222010	#N/A	0			9222010
922	2023	9222023	广东省	广东	广东2023	9.88283	#N/A	蔡昌	9222023蔡昌	独立董事	1		姜清海	9222023姜清海	副董事长,总经理	0		董惠江	9222023董惠江	独立董事	1	0		9222023	#N/A	0			9222023	#N/A	0			9222023	#N/A	0			9222023	#N/A	0			9222023	#N/A	0			9222023
923	2018	9232018	广东省	广东	广东2018	2.56495	0.0175543	商有光	9232018商有光	独立董事	1		徐永前	9232018徐永前	独立董事	1	0	王占明	9232018王占明	独立董事	1	0	刘键	9232018刘键	董事长	0		于根茂	9232018于根茂	非独立董事,总经理	0		魏广民	9232018魏广民	非独立董事	0			9232018	#N/A	0			9232018	#N/A	0			9232018
923	2022	9232022	广东省	广东	广东2022	9.96857	0.0155058	商有光	9232022商有光	独立董事	1		徐永前	9232022徐永前	独立董事	1	0	赵丽树	9232022赵丽树	非独立董事,总经理	0			9232022	#N/A	0			9232022	#N/A	0			9232022	#N/A	0			9232022	#N/A	0			9232022	#N/A	0			9232022
926	2010	9262010	广东省	广东	广东2010	#N/A	0.0216352	冯东兴	9262010冯东兴	董事,董事会秘书	0		胡朔商	9262010胡朔商	董事,财务总监	0		李守明	9262010李守明	独立董事	1	0	李顺义	9262010李顺义	独立董事	1	0	唐国平	9262010唐国平	独立董事	1	0		9262010	#N/A	0			9262010	#N/A	0			9262010	#N/A	0			9262010
926	2011	9262011	广东省	广东	广东2011	#N/A	0.0199093	唐国平	9262011唐国平	独立董事	1		李守明	9262011李守明	独立董事	1	0	赵曼	9262011赵曼	独立董事	1	0	胡朔商	9262011胡朔商	董事,财务总监	0		冯东兴	9262011冯东兴	董事,董事会秘书	0			9262011	#N/A	0			9262011	#N/A	0			9262011	#N/A	0			9262011
927	2015	9272015	天津市	天津	天津2015	2.89037	0.0263344	朱文山	9272015朱文山	独立董事	1		张宝珠	9272015张宝珠	董事	0		李显君	9272015李显君	独立董事	1	0	毛照昉	9272015毛照昉	独立董事	1	0	田聪明	9272015田聪明	董事,总经理	0			9272015	#N/A	0			9272015	#N/A	0			9272015	#N/A	0			9272015
927	2016	9272016	天津市	天津	天津2016	3.2581	0.0262332	毛照昉	9272016毛照昉	独立董事	1		田聪明	9272016田聪明	董事,总经理	0		孙敬梅	9272016孙敬梅	董事	0		李显君	9272016李显君	独立董事	1	0	朱文山	9272016朱文山	独立董事	1	0		9272016	#N/A	0			9272016	#N/A	0			9272016	#N/A	0			9272016
927	2018	9272018	天津市	天津	天津2018	4.33073	0.0251318	林东模	9272018林东模	独立董事	1		田聪明	9272018田聪明	董事,总经理	0		孙成	9272018孙成	董事	0		刘骏民	9272018刘骏民	独立董事	1	0	何青	9272018何青	独立董事	1	0		9272018	#N/A	0			9272018	#N/A	0			9272018	#N/A	0			9272018
928	2010	9282010	天津市	天津	天津2010	#N/A	0.0190721	康飞宇	9282010康飞宇	#N/A	0		李海涛	9282010李海涛	独立董事	1	0	王文军	9282010王文军	#N/A	0			9282010	#N/A	0			9282010	#N/A	0			9282010	#N/A	0			9282010	#N/A	0			9282010	#N/A	0			9282010
928	2016	9282016	天津市	天津	天津2016	3.2581	0.0262332	朱海武	9282016朱海武	独立董事	1		郑东	9282016郑东	独立董事	1	0	王建	9282016王建	非独立董事,总经理	0			9282016	#N/A	0			9282016	#N/A	0			9282016	#N/A	0			9282016	#N/A	0			9282016	#N/A	0			9282016
928	2017	9282017	天津市	天津	天津2017	3.3322	0.0210169	朱海武	9282017朱海武	独立董事	1		郑东	9282017郑东	独立董事	1	0	王建	9282017王建	非独立董事,总经理	0			9282017	#N/A	0			9282017	#N/A	0			9282017	#N/A	0			9282017	#N/A	0			9282017	#N/A	0			9282017
929	2012	9292012	天津市	天津	天津2012	#N/A	0.0171707	周一虹	9292012周一虹	独立董事	1		万红波	9292012万红波	独立董事	1	0	杨世江	9292012杨世江	董事长	0			9292012	#N/A	0			9292012	#N/A	0			9292012	#N/A	0			9292012	#N/A	0			9292012	#N/A	0			9292012
929	2013	9292013	天津市	天津	天津2013	#N/A	0.0189633	周一虹	9292013周一虹	独立董事	1		万红波	9292013万红波	独立董事	1	0	杨世江	9292013杨世江	董事长	0			9292013	#N/A	0			9292013	#N/A	0			9292013	#N/A	0			9292013	#N/A	0			9292013	#N/A	0			9292013
929	2021	9292021	天津市	天津	天津2021	6.61204	0.0191072	杨世江	9292021杨世江	董事长	0		李培根	9292021李培根	独立董事	1	0	周一虹	9292021周一虹	独立董事	1	1		9292021	#N/A	0			9292021	#N/A	0			9292021	#N/A	0			9292021	#N/A	0			9292021	#N/A	0			9292021
930	2010	9302010	安徽省	安徽	安徽2010	0.693147	0.0148976	夏令和	9302010夏令和	副董事长,总经理	0		张洪洲	9302010张洪洲	独立董事	1	0	卓文燕	9302010卓文燕	独立董事	1	0		9302010	#N/A	0			9302010	#N/A	0			9302010	#N/A	0			9302010	#N/A	0			9302010	#N/A	0			9302010
930	2011	9302011	安徽省	安徽	安徽2011	0.693147	0.0177839	夏令和	9302011夏令和	董事长	0		卓文燕	9302011卓文燕	独立董事	1	0	张洪洲	9302011张洪洲	独立董事	1	0		9302011	#N/A	0			9302011	#N/A	0			9302011	#N/A	0			9302011	#N/A	0			9302011	#N/A	0			9302011
930	2019	9302019	安徽省	安徽	安徽2019	3.4012	0.0163229	张德国	9302019张德国	董事,副总经理,财务总监,总经理	0		陈敦	9302019陈敦	独立董事	1	0	卓敏	9302019卓敏	独立董事	1	0		9302019	#N/A	0			9302019	#N/A	0			9302019	#N/A	0			9302019	#N/A	0			9302019	#N/A	0			9302019
930	2021	9302021	安徽省	安徽	安徽2021	9.33433	0.0165682	张德国	9302021张德国	董事,副总经理	0		李世辉	9302021李世辉	独立董事	1	0	卓敏	9302021卓敏	独立董事	1	0		9302021	#N/A	0			9302021	#N/A	0			9302021	#N/A	0			9302021	#N/A	0			9302021	#N/A	0			9302021
932	2017	9322017	湖南省	湖南	湖南2017	3.71357	0.0163375	张建平	9322017张建平	独立董事	1		谢岭	9322017谢岭	独立董事	1	0	阳向宏	9322017阳向宏	董事	0			9322017	#N/A	0			9322017	#N/A	0			9322017	#N/A	0			9322017	#N/A	0			9322017	#N/A	0			9322017
936	2014	9362014	河南省	河南	河南2014	2.3979	0.0182527	卞武彪	9362014卞武彪	董事,副总经理,董事会秘书	0		蔡建	9362014蔡建	独立董事	1	0	施平	9362014施平	独立董事	1	0		9362014	#N/A	0			9362014	#N/A	0			9362014	#N/A	0			9362014	#N/A	0			9362014	#N/A	0			9362014
936	2015	9362015	河南省	河南	河南2015	3.3322	0.016777	卞武彪	9362015卞武彪	董事	0		蔡建	9362015蔡建	独立董事	1	0	施平	9362015施平	独立董事	1	0		9362015	#N/A	0			9362015	#N/A	0			9362015	#N/A	0			9362015	#N/A	0			9362015	#N/A	0			9362015
938	2010	9382010	河北省	河北	河北2010	#N/A	0.0137727	马二恩	9382010马二恩	董事	0		王立彦	9382010王立彦	独立董事	1	0	张生瑜	9382010张生瑜	#N/A	0			9382010	#N/A	0			9382010	#N/A	0			9382010	#N/A	0			9382010	#N/A	0			9382010	#N/A	0			9382010
938	2013	9382013	河北省	河北	河北2013	#N/A	0.0188337	马二恩	9382013马二恩	#N/A	0		王立彦	9382013王立彦	独立董事	1	0	张生瑜	9382013张生瑜	#N/A	0		刘卫东	9382013刘卫东	独立董事	1	0	雷霖	9382013雷霖	董事	0			9382013	#N/A	0			9382013	#N/A	0			9382013	#N/A	0			9382013
939	2017	9392017	北京市	北京	北京2017	#N/A	0.0270469	张兆国	9392017张兆国	独立董事	1	1	厉培明	9392017厉培明	独立董事	1	1	唐宏明	9392017唐宏明	董事	0			9392017	#N/A	0			9392017	#N/A	0			9392017	#N/A	0			9392017	#N/A	0			9392017	#N/A	0			9392017
948	2010	9482010	北京市	北京	北京2010	0.693147	0.0194632	(suǒ)克明	9482010(suǒ)克明	独立董事	1		冯景雯	9482010冯景雯	#N/A	0		郑冬渝	9482010郑冬渝	#N/A	0			9482010	#N/A	0			9482010	#N/A	0			9482010	#N/A	0			9482010	#N/A	0			9482010	#N/A	0			9482010
948	2011	9482011	北京市	北京	北京2011	#N/A	0.0196226	母景平	9482011母景平	独立董事	1		安树昆	9482011安树昆	独立董事	1	0	(suǒ)克明	9482011(suǒ)克明	独立董事	1	0		9482011	#N/A	0			9482011	#N/A	0			9482011	#N/A	0			9482011	#N/A	0			9482011	#N/A	0			9482011
948	2012	9482012	北京市	北京	北京2012	#N/A	0.0180667	母景平	9482012母景平	独立董事	1		安树昆	9482012安树昆	独立董事	1	0	(suǒ)克明	9482012(suǒ)克明	独立董事	1	0		9482012	#N/A	0			9482012	#N/A	0			9482012	#N/A	0			9482012	#N/A	0			9482012	#N/A	0			9482012
948	2013	9482013	北京市	北京	北京2013	#N/A	0.0228363	母景平	9482013母景平	独立董事	1		安树昆	9482013安树昆	独立董事	1	0	(suǒ)克明	9482013(suǒ)克明	独立董事	1	0		9482013	#N/A	0			9482013	#N/A	0			9482013	#N/A	0			9482013	#N/A	0			9482013	#N/A	0			9482013
948	2014	9482014	北京市	北京	北京2014	#N/A	0.0259314	朱庆芬	9482014朱庆芬	独立董事	1		母景平	9482014母景平	独立董事	1	0	安树昆	9482014安树昆	独立董事	1	0		9482014	#N/A	0			9482014	#N/A	0			9482014	#N/A	0			9482014	#N/A	0			9482014	#N/A	0			9482014
951	2017	9512017	重庆市	重庆	重庆2017	0.693147	0.0211719	潘爱玲	9512017潘爱玲	独立董事	1		周书民	9512017周书民	独立董事	1	0	马增荣	9512017马增荣	独立董事	1	0	于瑞群	9512017于瑞群	董事,总经理	0		张晓东	9512017张晓东	副董事长	0			9512017	#N/A	0			9512017	#N/A	0			9512017	#N/A	0			9512017
951	2018	9512018	重庆市	重庆	重庆2018	#N/A	0.0231558	潘爱玲	9512018潘爱玲	独立董事	1		周书民	9512018周书民	独立董事	1	0	马增荣	9512018马增荣	独立董事	1	0	于瑞群	9512018于瑞群	董事,总经理	0		张晓东	9512018张晓东	副董事长	0			9512018	#N/A	0			9512018	#N/A	0			9512018	#N/A	0			9512018
951	2020	9512020	重庆市	重庆	重庆2020	0.693147	0.0188446	靳文生	9512020靳文生	董事,总经理	0		张宏	9512020张宏	独立董事	1	0	王德春	9512020王德春	非独立董事,董事长	0		马增荣	9512020马增荣	独立董事	1	0	周书民	9512020周书民	独立董事	1	0		9512020	#N/A	0			9512020	#N/A	0			9512020	#N/A	0			9512020
952	2018	9522018	重庆市	重庆	重庆2018	#N/A	0.0231558	杨汉明	9522018杨汉明	独立董事	1		刘晓勇	9522018刘晓勇	独立董事	1	0	曹亮	9522018曹亮	独立董事	1	0		9522018	#N/A	0			9522018	#N/A	0			9522018	#N/A	0			9522018	#N/A	0			9522018	#N/A	0			9522018
952	2022	9522022	重庆市	重庆	重庆2022	8.78094	0.0194916	洪葵	9522022洪葵	独立董事	1		梅建明	9522022梅建明	独立董事	1	0	李青原	9522022李青原	独立董事	1	0		9522022	#N/A	0			9522022	#N/A	0			9522022	#N/A	0			9522022	#N/A	0			9522022	#N/A	0			9522022
953	2014	9532014	重庆市	重庆	重庆2014	#N/A	0.0187249	李骅	9532014李骅	独立董事	1		李春啟	9532014李春啟	董事长	0		赵光辉	9532014赵光辉	董事,总经理	0		王若晨	9532014王若晨	独立董事	1	0	梁栋	9532014梁栋	独立董事	1	0		9532014	#N/A	0			9532014	#N/A	0			9532014	#N/A	0			9532014
953	2018	9532018	重庆市	重庆	重庆2018	#N/A	0.0231558	马云星	9532018马云星	独立董事	1		安楚玉	9532018安楚玉	副董事长	0		邹朝辉	9532018邹朝辉	非独立董事	0		杜惟毅	9532018杜惟毅	独立董事	1	0	潘勤	9532018潘勤	独立董事	1	0		9532018	#N/A	0			9532018	#N/A	0			9532018	#N/A	0			9532018
957	2013	9572013	重庆市	重庆	重庆2013	#N/A	0.0234831	张宏	9572013张宏	独立董事	1		邹虎啸	9572013邹虎啸	副董事长	0		李广源	9572013李广源	独立董事	1	0		9572013	#N/A	0			9572013	#N/A	0			9572013	#N/A	0			9572013	#N/A	0			9572013	#N/A	0			9572013
957	2015	9572015	重庆市	重庆	重庆2015	#N/A	0.0232457	李广源	9572015李广源	独立董事	1		宿玉海	9572015宿玉海	独立董事	1	0	郑明俊	9572015郑明俊	独立董事	1	0	檀长银	9572015檀长银	独立董事	1	0		9572015	#N/A	0			9572015	#N/A	0			9572015	#N/A	0			9572015	#N/A	0			9572015
957	2016	9572016	重庆市	重庆	重庆2016	0.693147	0.0273548	李广源	9572016李广源	独立董事	1		宿玉海	9572016宿玉海	独立董事	1	0	郑明俊	9572016郑明俊	独立董事	1	0	檀长银	9572016檀长银	独立董事	1	0		9572016	#N/A	0			9572016	#N/A	0			9572016	#N/A	0			9572016	#N/A	0			9572016
957	2017	9572017	重庆市	重庆	重庆2017	0.693147	0.0211719	宿玉海	9572017宿玉海	独立董事	1		郑明俊	9572017郑明俊	独立董事	1	0	檀长银	9572017檀长银	独立董事	1	0	刘峰	9572017刘峰	董事	0		贾开潜	9572017贾开潜	董事	0			9572017	#N/A	0			9572017	#N/A	0			9572017	#N/A	0			9572017
957	2019	9572019	重庆市	重庆	重庆2019	1.94591	0.0199102	宿玉海	9572019宿玉海	独立董事	1		郑明俊	9572019郑明俊	独立董事	1	0	檀长银	9572019檀长银	独立董事	1	0	刘峰	9572019刘峰	董事	0		贾开潜	9572019贾开潜	副总经理,董事	0			9572019	#N/A	0			9572019	#N/A	0			9572019	#N/A	0			9572019
957	2020	9572020	重庆市	重庆	重庆2020	0.693147	0.0188446	肖成伟	9572020肖成伟	独立董事	1	1	王晓明	9572020王晓明	独立董事	1	1	王月永	9572020王月永	独立董事	1	0		9572020	#N/A	0			9572020	#N/A	0			9572020	#N/A	0			9572020	#N/A	0			9572020	#N/A	0			9572020
957	2023	9572023	重庆市	重庆	重庆2023	8.84491	#N/A	王德建	9572023王德建	独立董事	1		刘冰	9572023刘冰	独立董事	1	0	张燕	9572023张燕	非独立董事	0			9572023	#N/A	0			9572023	#N/A	0			9572023	#N/A	0			9572023	#N/A	0			9572023	#N/A	0			9572023
958	2015	9582015	重庆市	重庆	重庆2015	#N/A	0.0232457	张玉周	9582015张玉周	独立董事	1		陈爱珍	9582015陈爱珍	独立董事	1	0	郭守国	9582015郭守国	董事,副总经理	0			9582015	#N/A	0			9582015	#N/A	0			9582015	#N/A	0			9582015	#N/A	0			9582015	#N/A	0			9582015
959	2010	9592010	北京市	北京	北京2010	0.693147	0.0194632	杨雄	9592010杨雄	独立董事	1		高培勇	9592010高培勇	独立董事	1	0	方建一	9592010方建一	董事	0			9592010	#N/A	0			9592010	#N/A	0			9592010	#N/A	0			9592010	#N/A	0			9592010	#N/A	0			9592010
959	2011	9592011	北京市	北京	北京2011	#N/A	0.0196226	杨雄	9592011杨雄	独立董事	1		高培勇	9592011高培勇	独立董事	1	0	方建一	9592011方建一	董事	0			9592011	#N/A	0			9592011	#N/A	0			9592011	#N/A	0			9592011	#N/A	0			9592011	#N/A	0			9592011
961	2014	9612014	江苏省	江苏	江苏2014	#N/A	0.0247383	曹阳	9612014曹阳	独立董事	1		智刚	9612014智刚	董事,副总经理,董事会秘书	0		倪俊骥	9612014倪俊骥	独立董事	1	0		9612014	#N/A	0			9612014	#N/A	0			9612014	#N/A	0			9612014	#N/A	0			9612014	#N/A	0			9612014
961	2016	9612016	江苏省	江苏	江苏2016	0.693147	0.0231946	智刚	9612016智刚	董事,副总经理,董事会秘书	0		倪俊骥	9612016倪俊骥	独立董事	1	0		9612016	#N/A	0			9612016	#N/A	0			9612016	#N/A	0			9612016	#N/A	0			9612016	#N/A	0			9612016	#N/A	0			9612016
961	2017	9612017	江苏省	江苏	江苏2017	2.48491	0.0210849	黄峰	9612017黄峰	独立董事	1		智刚	9612017智刚	副总经理,董事	0		倪俊骥	9612017倪俊骥	独立董事	1	0		9612017	#N/A	0			9612017	#N/A	0			9612017	#N/A	0			9612017	#N/A	0			9612017	#N/A	0			9612017
965	2017	9652017	浙江省	浙江	浙江2017	1.09861	0.0181469	付旭东	9652017付旭东	独立董事	1		路昆	9652017路昆	董事,常务副总经理	0		李祥	9652017李祥	独立董事	1	0		9652017	#N/A	0			9652017	#N/A	0			9652017	#N/A	0			9652017	#N/A	0			9652017	#N/A	0			9652017
965	2018	9652018	浙江省	浙江	浙江2018	1.79176	0.0193728	段咏	9652018段咏	独立董事	1		马弘	9652018马弘	独立董事	1	0	薛晓芳	9652018薛晓芳	非独立董事	0			9652018	#N/A	0			9652018	#N/A	0			9652018	#N/A	0			9652018	#N/A	0			9652018	#N/A	0			9652018
965	2019	9652019	浙江省	浙江	浙江2019	4.81218	0.0120027	段咏	9652019段咏	独立董事	1		马弘	9652019马弘	独立董事	1	0	薛晓芳	9652019薛晓芳	非独立董事	0			9652019	#N/A	0			9652019	#N/A	0			9652019	#N/A	0			9652019	#N/A	0			9652019	#N/A	0			9652019
967	2010	9672010	湖北省	湖北	湖北2010	#N/A	0.0200518	苏武俊	9672010苏武俊	独立董事	1		于叶舟	9672010于叶舟	董事	0		吴应良	9672010吴应良	独立董事	1	0		9672010	#N/A	0			9672010	#N/A	0			9672010	#N/A	0			9672010	#N/A	0			9672010	#N/A	0			9672010
970	2012	9702012	北京市	北京	北京2012	#N/A	0.0180667	王瑞华	9702012王瑞华	独立董事	1		权绍宁	9702012权绍宁	独立董事	1	0	张国宏	9702012张国宏	董事	0			9702012	#N/A	0			9702012	#N/A	0			9702012	#N/A	0			9702012	#N/A	0			9702012	#N/A	0			9702012
970	2013	9702013	北京市	北京	北京2013	#N/A	0.0228363	王瑞华	9702013王瑞华	独立董事	1		权绍宁	9702013权绍宁	独立董事	1	0	张国宏	9702013张国宏	董事	0			9702013	#N/A	0			9702013	#N/A	0			9702013	#N/A	0			9702013	#N/A	0			9702013	#N/A	0			9702013
970	2018	9702018	北京市	北京	北京2018	1.79176	0.028059	王瑞华	9702018王瑞华	独立董事	1		孙继荣	9702018孙继荣	独立董事	1	0	胡伯平	9702018胡伯平	副董事长	0			9702018	#N/A	0			9702018	#N/A	0			9702018	#N/A	0			9702018	#N/A	0			9702018	#N/A	0			9702018
970	2019	9702019	北京市	北京	北京2019	1.38629	0.0248181	王瑞华	9702019王瑞华	独立董事	1		孙继荣	9702019孙继荣	独立董事	1	0	胡伯平	9702019胡伯平	副董事长	0			9702019	#N/A	0			9702019	#N/A	0			9702019	#N/A	0			9702019	#N/A	0			9702019	#N/A	0			9702019
970	2020	9702020	北京市	北京	北京2020	2.3979	0.022133	沈保根	9702020沈保根	独立董事	1	1	王瑞华	9702020王瑞华	独立董事	1	0	胡伯平	9702020胡伯平	执行董事长	0			9702020	#N/A	0			9702020	#N/A	0			9702020	#N/A	0			9702020	#N/A	0			9702020	#N/A	0			9702020
971	2016	9712016	北京市	北京	北京2016	1.09861	0.0311098	陈国欣	9712016陈国欣	独立董事	1		董红	9712016董红	董事,财务总监	0		雷达	9712016雷达	独立董事	1	0	常燕	9712016常燕	董事	0			9712016	#N/A	0			9712016	#N/A	0			9712016	#N/A	0			9712016	#N/A	0			9712016
971	2017	9712017	北京市	北京	北京2017	#N/A	0.0270469	陈国欣	9712017陈国欣	独立董事	1		董红	9712017董红	董事	0		雷达	9712017雷达	独立董事	1	0	田迎春	9712017田迎春	独立董事	1	0	袁东风	9712017袁东风	董事	0			9712017	#N/A	0			9712017	#N/A	0			9712017	#N/A	0			9712017
972	2010	9722010	北京市	北京	北京2010	0.693147	0.0194632	胡建军	9722010胡建军	董事	0		孙卫红	9722010孙卫红	独立董事	1	0	王立华	9722010王立华	独立董事	1	0		9722010	#N/A	0			9722010	#N/A	0			9722010	#N/A	0			9722010	#N/A	0			9722010	#N/A	0			9722010
973	2012	9732012	北京市	北京	北京2012	#N/A	0.0180667		9732012	#N/A	0			9732012	#N/A	0			9732012	#N/A	0			9732012	#N/A	0			9732012	#N/A	0			9732012	#N/A	0			9732012	#N/A	0			9732012	#N/A	0			9732012
973	2013	9732013	北京市	北京	北京2013	#N/A	0.0228363	于李胜	9732013于李胜	独立董事	1		朱义坤	9732013朱义坤	独立董事	1	0	廖正品	9732013廖正品	独立董事	1	1	吴跃明	9732013吴跃明	董事	0		宋同辙	9732013宋同辙	董事	0			9732013	#N/A	0			9732013	#N/A	0			9732013	#N/A	0			9732013
973	2014	9732014	北京市	北京	北京2014	#N/A	0.0259314	于李胜	9732014于李胜	独立董事	1		朱义坤	9732014朱义坤	独立董事	1	0	廖正品	9732014廖正品	独立董事	1	1	吴跃明	9732014吴跃明	董事	0		宋同辙	9732014宋同辙	董事	0			9732014	#N/A	0			9732014	#N/A	0			9732014	#N/A	0			9732014
973	2015	9732015	北京市	北京	北京2015	0.693147	0.0241708	于李胜	9732015于李胜	独立董事	1		朱义坤	9732015朱义坤	独立董事	1	0	廖正品	9732015廖正品	独立董事	1	1	吴跃明	9732015吴跃明	董事	0		宋同辙	9732015宋同辙	董事	0			9732015	#N/A	0			9732015	#N/A	0			9732015	#N/A	0			9732015
973	2016	9732016	北京市	北京	北京2016	1.09861	0.0311098	于李胜	9732016于李胜	独立董事	1		廖正品	9732016廖正品	独立董事	1	1	邓鹏	9732016邓鹏	独立董事	1	0	宋同辙	9732016宋同辙	董事	0			9732016	#N/A	0			9732016	#N/A	0			9732016	#N/A	0			9732016	#N/A	0			9732016
973	2017	9732017	北京市	北京	北京2017	#N/A	0.0270469	罗绍德	9732017罗绍德	独立董事	1		廖正品	9732017廖正品	独立董事	1	1	邓鹏	9732017邓鹏	独立董事	1	0		9732017	#N/A	0			9732017	#N/A	0			9732017	#N/A	0			9732017	#N/A	0			9732017	#N/A	0			9732017
973	2018	9732018	北京市	北京	北京2018	1.79176	0.028059	罗绍德	9732018罗绍德	独立董事	1	1	廖正品	9732018廖正品	独立董事	1	1	邓鹏	9732018邓鹏	独立董事	1	1		9732018	#N/A	0			9732018	#N/A	0			9732018	#N/A	0			9732018	#N/A	0			9732018	#N/A	0			9732018
973	2022	9732022	北京市	北京	北京2022	7.92588	0.0163973	罗绍德	9732022罗绍德	独立董事	1		周荣	9732022周荣	独立董事	1	0	于跃	9732022于跃	独立董事	1	0		9732022	#N/A	0			9732022	#N/A	0			9732022	#N/A	0			9732022	#N/A	0			9732022	#N/A	0			9732022
973	2023	9732023	北京市	北京	北京2023	7.79934	#N/A	周荣	9732023周荣	独立董事	1		李震东	9732023李震东	独立董事	1	0	肖继辉	9732023肖继辉	独立董事	1	0		9732023	#N/A	0			9732023	#N/A	0			9732023	#N/A	0			9732023	#N/A	0			9732023	#N/A	0			9732023
975	2011	9752011	北京市	北京	北京2011	#N/A	0.0196226	冯道祥	9752011冯道祥	独立董事	1		郭卫东	9752011郭卫东	独立董事	1	0	林毅建	9752011林毅建	董事	0		卢文彬	9752011卢文彬	独立董事	1	0		9752011	#N/A	0			9752011	#N/A	0			9752011	#N/A	0			9752011	#N/A	0			9752011
975	2012	9752012	北京市	北京	北京2012	#N/A	0.0180667	林毅建	9752012林毅建	董事	0		卢文彬	9752012卢文彬	独立董事	1	0	冯道祥	9752012冯道祥	独立董事	1	0	郭卫东	9752012郭卫东	独立董事	1	0		9752012	#N/A	0			9752012	#N/A	0			9752012	#N/A	0			9752012	#N/A	0			9752012
976	2017	9762017	内蒙古自治区	内蒙古	内蒙古2017	3.89182	0.0212675	袁坚刚	9762017袁坚刚	独立董事	1	1	祝丽玮	9762017祝丽玮	独立董事	1	0	石松山	9762017石松山	董事	0			9762017	#N/A	0			9762017	#N/A	0			9762017	#N/A	0			9762017	#N/A	0			9762017	#N/A	0			9762017
976	2018	9762018	内蒙古自治区	内蒙古	内蒙古2018	2.56495	0.0207708	袁坚刚	9762018袁坚刚	独立董事	1	1	祝丽玮	9762018祝丽玮	独立董事	1	0	石松山	9762018石松山	董事长	0			9762018	#N/A	0			9762018	#N/A	0			9762018	#N/A	0			9762018	#N/A	0			9762018	#N/A	0			9762018
977	2015	9772015	山东省	山东	山东2015	4.15888	0.0157355	韩传模	9772015韩传模	独立董事	1		王恩东	9772015王恩东	副董事长,总经理	0		宁家骏	9772015宁家骏	独立董事	1	0		9772015	#N/A	0			9772015	#N/A	0			9772015	#N/A	0			9772015	#N/A	0			9772015	#N/A	0			9772015
977	2016	9772016	山东省	山东	山东2016	#N/A	0.0178275	韩传模	9772016韩传模	独立董事	1		王恩东	9772016王恩东	副董事长,总经理	0		宁家骏	9772016宁家骏	独立董事	1	0		9772016	#N/A	0			9772016	#N/A	0			9772016	#N/A	0			9772016	#N/A	0			9772016	#N/A	0			9772016
977	2017	9772017	山东省	山东	山东2017	2.07944	0.0146452	韩传模	9772017韩传模	独立董事	1		王恩东	9772017王恩东	总经理,董事,副董事长,首席执行官(CEO)	0		陈志军	9772017陈志军	独立董事	1	0		9772017	#N/A	0			9772017	#N/A	0			9772017	#N/A	0			9772017	#N/A	0			9772017	#N/A	0			9772017
977	2018	9772018	山东省	山东	山东2018	2.3979	0.0165044	韩传模	9772018韩传模	独立董事	1		彭震	9772018彭震	副董事长,总经理,首席执行官(CEO)	0		陈志军	9772018陈志军	独立董事	1	0		9772018	#N/A	0			9772018	#N/A	0			9772018	#N/A	0			9772018	#N/A	0			9772018	#N/A	0			9772018
977	2019	9772019	山东省	山东	山东2019	3.21888	0.0146235	韩传模	9772019韩传模	独立董事	1		彭震	9772019彭震	副董事长,总经理	0		陈志军	9772019陈志军	独立董事	1	0		9772019	#N/A	0			9772019	#N/A	0			9772019	#N/A	0			9772019	#N/A	0			9772019	#N/A	0			9772019
977	2020	9772020	山东省	山东	山东2020	3.49651	0.0128581	王爱国	9772020王爱国	独立董事	1		王培志	9772020王培志	独立董事	1	0	彭震	9772020彭震	副董事长,总经理	0			9772020	#N/A	0			9772020	#N/A	0			9772020	#N/A	0			9772020	#N/A	0			9772020	#N/A	0			9772020
977	2022	9772022	山东省	山东	山东2022	9.28952	0.0154946	王爱国	9772022王爱国	独立董事	1		王培志	9772022王培志	独立董事	1	0	彭震	9772022彭震	副董事长,总经理	0			9772022	#N/A	0			9772022	#N/A	0			9772022	#N/A	0			9772022	#N/A	0			9772022	#N/A	0			9772022
977	2023	9772023	山东省	山东	山东2023	9.13669	#N/A	王爱国	9772023王爱国	独立董事	1		刘培德	9772023刘培德	独立董事	1	0	王培志	9772023王培志	独立董事	1	0		9772023	#N/A	0			9772023	#N/A	0			9772023	#N/A	0			9772023	#N/A	0			9772023	#N/A	0			9772023
980	2015	9802015	安徽省	安徽	安徽2015	1.60944	0.0166536	俞斌	9802015俞斌	董事,常务副总经理	0		罗金明	9802015罗金明	独立董事	1	0	黄攸立	9802015黄攸立	独立董事	1	0		9802015	#N/A	0			9802015	#N/A	0			9802015	#N/A	0			9802015	#N/A	0			9802015	#N/A	0			9802015
980	2023	9802023	浙江省	浙江	浙江2023	9.74326	#N/A	赵万华	9802023赵万华	独立董事	1		王务林	9802023王务林	独立董事	1	0	刘娅	9802023刘娅	非独立董事,副总裁	0		崔晓钟	9802023崔晓钟	独立董事	1	0	连刚	9802023连刚	董事,总裁	0			9802023	#N/A	0			9802023	#N/A	0			9802023	#N/A	0			9802023
981	2015	9812015	甘肃省	甘肃	甘肃2015	0.693147	0.0189359	邱妘	9812015邱妘	独立董事	1		张明海	9812015张明海	副董事长	0		郑如飞	9812015郑如飞	独立董事	1	0		9812015	#N/A	0			9812015	#N/A	0			9812015	#N/A	0			9812015	#N/A	0			9812015	#N/A	0			9812015
983	2012	9832012	山西省	山西	山西2012	#N/A	0.0170732	李端生	9832012李端生	独立董事	1		张继武	9832012张继武	独立董事	1	0	单卫红	9832012单卫红	独立董事	1	0	栗兴仁	9832012栗兴仁	董事	0		支亚毅	9832012支亚毅	董事,董事会秘书	0			9832012	#N/A	0			9832012	#N/A	0			9832012	#N/A	0			9832012
985	2010	9852010	山西省	山西	山西2010	0.693147	0.018821	吕延防	9852010吕延防	独立董事	1		宋之杰	9852010宋之杰	独立董事	1	0	万志强	9852010万志强	董事长	0		肖锐	9852010肖锐	董事	0		赵士刚	9852010赵士刚	独立董事	1	0		9852010	#N/A	0			9852010	#N/A	0			9852010	#N/A	0			9852010
985	2011	9852011	山西省	山西	山西2011	#N/A	0.0225332	滕英超	9852011滕英超	独立董事	1		施铁权	9852011施铁权	董事	0		秦雪军	9852011秦雪军	独立董事	1	0		9852011	#N/A	0			9852011	#N/A	0			9852011	#N/A	0			9852011	#N/A	0			9852011	#N/A	0			9852011
985	2012	9852012	山西省	山西	山西2012	#N/A	0.0170732	滕英超	9852012滕英超	独立董事	1		盖文国	9852012盖文国	董事	0		秦雪军	9852012秦雪军	独立董事	1	0		9852012	#N/A	0			9852012	#N/A	0			9852012	#N/A	0			9852012	#N/A	0			9852012	#N/A	0			9852012
985	2013	9852013	山西省	山西	山西2013	#N/A	0.0215092	滕英超	9852013滕英超	独立董事	1		盖文国	9852013盖文国	董事	0		秦雪军	9852013秦雪军	独立董事	1	0		9852013	#N/A	0			9852013	#N/A	0			9852013	#N/A	0			9852013	#N/A	0			9852013	#N/A	0			9852013
985	2014	9852014	山西省	山西	山西2014	#N/A	0.0182733	滕英超	9852014滕英超	独立董事	1		耿金波	9852014耿金波	董事	0		肖殿发	9852014肖殿发	独立董事	1	0		9852014	#N/A	0			9852014	#N/A	0			9852014	#N/A	0			9852014	#N/A	0			9852014	#N/A	0			9852014
985	2015	9852015	山西省	山西	山西2015	#N/A	0.0228082	滕英超	9852015滕英超	独立董事	1		尹兴华	9852015尹兴华	董事	0		肖殿发	9852015肖殿发	独立董事	1	0		9852015	#N/A	0			9852015	#N/A	0			9852015	#N/A	0			9852015	#N/A	0			9852015	#N/A	0			9852015
985	2016	9852016	山西省	山西	山西2016	0.693147	0.0223427	滕英超	9852016滕英超	独立董事	1		尹兴华	9852016尹兴华	董事	0		肖殿发	9852016肖殿发	独立董事	1	0		9852016	#N/A	0			9852016	#N/A	0			9852016	#N/A	0			9852016	#N/A	0			9852016	#N/A	0			9852016
985	2017	9852017	山西省	山西	山西2017	#N/A	0.0237677	于冲	9852017于冲	独立董事	1		尹兴华	9852017尹兴华	董事	0		宋之杰	9852017宋之杰	独立董事	1	0		9852017	#N/A	0			9852017	#N/A	0			9852017	#N/A	0			9852017	#N/A	0			9852017	#N/A	0			9852017
987	2010	9872010	山西省	山西	山西2010	0.693147	0.018821	邓美薇	9872010邓美薇	董事,董事会秘书	0		董小麟	9872010董小麟	独立董事	1	0	李映照	9872010李映照	独立董事	1	0		9872010	#N/A	0			9872010	#N/A	0			9872010	#N/A	0			9872010	#N/A	0			9872010	#N/A	0			9872010
988	2015	9882015	湖北省	湖北	湖北2015	1.79176	0.0190792	刘国武	9882015刘国武	独立董事	1		蔡学恩	9882015蔡学恩	独立董事	1	1	马新强	9882015马新强	董事长,党委书记	0			9882015	#N/A	0			9882015	#N/A	0			9882015	#N/A	0			9882015	#N/A	0			9882015	#N/A	0			9882015
989	2016	9892016	湖南省	湖南	湖南2016	2.3979	0.0200848	胡建军	9892016胡建军	独立董事	1		盛锁柱	9892016盛锁柱	董事,副总经理	0		马卓檀	9892016马卓檀	独立董事	1	0		9892016	#N/A	0			9892016	#N/A	0			9892016	#N/A	0			9892016	#N/A	0			9892016	#N/A	0			9892016
995	2010	9952010	福建省	福建	福建2010	#N/A	0.0155004	贾福宁	9952010贾福宁	独立董事	1		亢滢浩	9952010亢滢浩	独立董事	1	0	吴生元	9952010吴生元	副董事长	0			9952010	#N/A	0			9952010	#N/A	0			9952010	#N/A	0			9952010	#N/A	0			9952010	#N/A	0			9952010
996	2010	9962010	福建省	福建	福建2010	#N/A	0.0155004	姜长龙	9962010姜长龙	独立董事	1		姜荣	9962010姜荣	董事	0		周绍朋	9962010周绍朋	独立董事	1	0		9962010	#N/A	0			9962010	#N/A	0			9962010	#N/A	0			9962010	#N/A	0			9962010	#N/A	0			9962010
996	2011	9962011	福建省	福建	福建2011	0.693147	0.0172949	姜长龙	9962011姜长龙	独立董事	1		姜荣	9962011姜荣	董事	0		周绍朋	9962011周绍朋	独立董事	1	0		9962011	#N/A	0			9962011	#N/A	0			9962011	#N/A	0			9962011	#N/A	0			9962011	#N/A	0			9962011
996	2013	9962013	福建省	福建	福建2013	#N/A	0.0214459	王玉伟	9962013王玉伟	独立董事	1		孔雨泉	9962013孔雨泉	独立董事	1	0	徐朝武	9962013徐朝武	董事,副总经理,董事会秘书,财务总监	0			9962013	#N/A	0			9962013	#N/A	0			9962013	#N/A	0			9962013	#N/A	0			9962013	#N/A	0			9962013
996	2016	9962016	福建省	福建	福建2016	#N/A	0.0241498	王玉伟	9962016王玉伟	独立董事	1		孔雨泉	9962016孔雨泉	独立董事	1	0	徐朝武	9962016徐朝武	董事,副总经理,董事会秘书	0			9962016	#N/A	0			9962016	#N/A	0			9962016	#N/A	0			9962016	#N/A	0			9962016	#N/A	0			9962016
996	2017	9962017	福建省	福建	福建2017	1.94591	0.0220731	薛健	9962017薛健	独立董事	1		田轩	9962017田轩	独立董事	1	0	姜荣	9962017姜荣	董事,财务负责人	0			9962017	#N/A	0			9962017	#N/A	0			9962017	#N/A	0			9962017	#N/A	0			9962017	#N/A	0			9962017
1209	2022	12092022	广东省	广东	广东2022	9.96857	0.0155058	林峰	12092022林峰	独立董事	1		郭梧文	12092022郭梧文	董事长	0		白华	12092022白华	独立董事	1	1		12092022	#N/A	0			12092022	#N/A	0			12092022	#N/A	0			12092022	#N/A	0			12092022	#N/A	0			12092022
1213	2022	12132022	广东省	广东	广东2022	9.96857	0.0155058	潘志成	12132022潘志成	独立董事	1	1	张重天	12132022张重天	职工代表董事,副总经理	0		马传骐	12132022马传骐	独立董事	1	0		12132022	#N/A	0			12132022	#N/A	0			12132022	#N/A	0			12132022	#N/A	0			12132022	#N/A	0			12132022
1219	2023	12192023	广东省	广东	广东2023	9.88283	#N/A	仲明	12192023仲明	董事长	0		管建明	12192023管建明	独立董事	1	0	解万翠	12192023解万翠	独立董事	1	0		12192023	#N/A	0			12192023	#N/A	0			12192023	#N/A	0			12192023	#N/A	0			12192023	#N/A	0			12192023
1223	2022	12232022	广东省	广东	广东2022	9.96857	0.0155058	黄利萍	12232022黄利萍	独立董事	1		雷建民	12232022雷建民	独立董事	1	0	冷庆晖	12232022冷庆晖	独立董事	1	0		12232022	#N/A	0			12232022	#N/A	0			12232022	#N/A	0			12232022	#N/A	0			12232022	#N/A	0			12232022
1223	2023	12232023	广东省	广东	广东2023	9.88283	#N/A	黄利萍	12232023黄利萍	独立董事	1		雷建民	12232023雷建民	独立董事	1	0	冷庆晖	12232023冷庆晖	独立董事	1	0		12232023	#N/A	0			12232023	#N/A	0			12232023	#N/A	0			12232023	#N/A	0			12232023	#N/A	0			12232023
1230	2022	12302022	广东省	广东	广东2022	9.96857	0.0155058	于晓娟	12302022于晓娟	董事,副总经理	0		李琳	12302022李琳	独立董事	1	1	华东	12302022华东	独立董事	1	0		12302022	#N/A	0			12302022	#N/A	0			12302022	#N/A	0			12302022	#N/A	0			12302022	#N/A	0			12302022
1230	2023	12302023	广东省	广东	广东2023	9.88283	#N/A	华东	12302023华东	独立董事	1		王传华	12302023王传华	执行董事长,副总经理	0		陈高才	12302023陈高才	独立董事	1	1		12302023	#N/A	0			12302023	#N/A	0			12302023	#N/A	0			12302023	#N/A	0			12302023	#N/A	0			12302023
1258	2022	12582022	广东省	广东	广东2022	9.96857	0.0155058	王博	12582022王博	董事长,总经理	0		姚文英	12582022姚文英	独立董事	1	0	温晓军	12582022温晓军	独立董事	1	1		12582022	#N/A	0			12582022	#N/A	0			12582022	#N/A	0			12582022	#N/A	0			12582022	#N/A	0			12582022
1308	2023	13082023	北京市	北京	北京2023	7.79934	#N/A	邓燏	13082023邓燏	独立董事	1		黄绍彬	13082023黄绍彬	独立董事	1	0	凌斌	13082023凌斌	董事长	0			13082023	#N/A	0			13082023	#N/A	0			13082023	#N/A	0			13082023	#N/A	0			13082023	#N/A	0			13082023
1318	2022	13182022	北京市	北京	北京2022	7.92588	0.0163973		13182022	#N/A	0			13182022	#N/A	0			13182022	#N/A	0			13182022	#N/A	0			13182022	#N/A	0			13182022	#N/A	0			13182022	#N/A	0			13182022	#N/A	0			13182022
1322	2022	13222022	北京市	北京	北京2022	7.92588	0.0163973	饶品贵	13222022饶品贵	独立董事	1		李胜兰	13222022李胜兰	独立董事	1	1	谢岳荣	13222022谢岳荣	董事长,总经理	0			13222022	#N/A	0			13222022	#N/A	0			13222022	#N/A	0			13222022	#N/A	0			13222022	#N/A	0			13222022
1359	2023	13592023	北京市	北京	北京2023	7.79934	#N/A		13592023	#N/A	0			13592023	#N/A	0			13592023	#N/A	0			13592023	#N/A	0			13592023	#N/A	0			13592023	#N/A	0			13592023	#N/A	0			13592023	#N/A	0			13592023
1896	2010	18962010	广东省	广东	广东2010	#N/A	0.0216352	刘家森	18962010刘家森	独立董事	1		翟新生	18962010翟新生	独立董事	1	0	张泽华	18962010张泽华	董事	0		张勇	18962010张勇	董事	0			18962010	#N/A	0			18962010	#N/A	0			18962010	#N/A	0			18962010	#N/A	0			18962010
1896	2012	18962012	广东省	广东	广东2012	0.693147	0.0230561	翟新生	18962012翟新生	独立董事	1		董鹏	18962012董鹏	独立董事	1	0	胡长根	18962012胡长根	董事	0			18962012	#N/A	0			18962012	#N/A	0			18962012	#N/A	0			18962012	#N/A	0			18962012	#N/A	0			18962012
1896	2015	18962015	广东省	广东	广东2015	0.693147	0.0185536	申香华	18962015申香华	独立董事	1		刘汴生	18962015刘汴生	独立董事	1	0	宋和平	18962015宋和平	董事,常务副总经理	0			18962015	#N/A	0			18962015	#N/A	0			18962015	#N/A	0			18962015	#N/A	0			18962015	#N/A	0			18962015
1896	2017	18962017	广东省	广东	广东2017	2.70805	0.0163228	刘振	18962017刘振	独立董事	1		刘汴生	18962017刘汴生	独立董事	1	0	梁文	18962017梁文	职工董事,纪委书记	0			18962017	#N/A	0			18962017	#N/A	0			18962017	#N/A	0			18962017	#N/A	0			18962017	#N/A	0			18962017
1896	2019	18962019	广东省	广东	广东2019	2.77259	0.0140111	刘振	18962019刘振	独立董事	1		刘汴生	18962019刘汴生	独立董事	1	0	梁文	18962019梁文	职工董事,纪委书记	0			18962019	#N/A	0			18962019	#N/A	0			18962019	#N/A	0			18962019	#N/A	0			18962019	#N/A	0			18962019
2002	2016	20022016	浙江省	浙江	浙江2016	1.09861	0.026311	江希和	20022016江希和	独立董事	1		李旦生	20022016李旦生	独立董事	1	1	刘东升	20022016刘东升	独立董事	1	1	蔡红兵	20022016蔡红兵	董事	0		王羽跃	20022016王羽跃	董事,常务副总经理	0			20022016	#N/A	0			20022016	#N/A	0			20022016	#N/A	0			20022016
2002	2022	20022022	江苏省	江苏	江苏2022	9.38597	0.0208616	崔毅	20022022崔毅	独立董事	1		廖锐浩	20022022廖锐浩	独立董事	1	0	温和	20022022温和	独立董事	1	0	蔡红兵	20022022蔡红兵	董事	0		王羽跃	20022022王羽跃	董事	0			20022022	#N/A	0			20022022	#N/A	0			20022022	#N/A	0			20022022
2003	2021	20032021	浙江省	浙江	浙江2021	9.66402	0.0154038	毛美英	20032021毛美英	独立董事	1		周岳江	20032021周岳江	独立董事	1	0	沈利勇	20032021沈利勇	董事,财务总监	0			20032021	#N/A	0			20032021	#N/A	0			20032021	#N/A	0			20032021	#N/A	0			20032021	#N/A	0			20032021
2005	2016	20052016	广东省	广东	广东2016	1.94591	0.0237664	苏清卫	20052016苏清卫	独立董事	1	1	王建国	20052016王建国	独立董事	1	0	李华亭	20052016李华亭	副董事长,总经理(代理)	0			20052016	#N/A	0			20052016	#N/A	0			20052016	#N/A	0			20052016	#N/A	0			20052016	#N/A	0			20052016
2007	2018	20072018	河南省	河南	河南2018	4.46591	0.0189316	田莉军	20072018田莉军	独立董事	1		安颖	20072018安颖	董事	0		苏志国	20072018苏志国	独立董事	1	0		20072018	#N/A	0			20072018	#N/A	0			20072018	#N/A	0			20072018	#N/A	0			20072018	#N/A	0			20072018
2007	2019	20072019	河南省	河南	河南2019	4.89784	0.0185283	田莉军	20072019田莉军	独立董事	1		黄培堂	20072019黄培堂	独立董事	1	0	安颖	20072019安颖	董事	0			20072019	#N/A	0			20072019	#N/A	0			20072019	#N/A	0			20072019	#N/A	0			20072019	#N/A	0			20072019
2007	2020	20072020	河南省	河南	河南2020	5.15329	0.020523	刘万丽	20072020刘万丽	独立董事	1		黄培堂	20072020黄培堂	独立董事	1	0	安颖	20072020安颖	董事	0			20072020	#N/A	0			20072020	#N/A	0			20072020	#N/A	0			20072020	#N/A	0			20072020	#N/A	0			20072020
2008	2011	20082011	广东省	广东	广东2011	#N/A	0.0199093	王红波	20082011王红波	独立董事	1		于秀峰	20082011于秀峰	独立董事	1	0	张建群	20082011张建群	副董事长,常务副总经理	0			20082011	#N/A	0			20082011	#N/A	0			20082011	#N/A	0			20082011	#N/A	0			20082011	#N/A	0			20082011
2008	2017	20082017	广东省	广东	广东2017	2.70805	0.0163228	郭晋龙	20082017郭晋龙	独立董事	1		邱大梁	20082017邱大梁	独立董事	1	1	张建群	20082017张建群	副董事长,副总经理	0			20082017	#N/A	0			20082017	#N/A	0			20082017	#N/A	0			20082017	#N/A	0			20082017	#N/A	0			20082017
2008	2019	20082019	广东省	广东	广东2019	2.77259	0.0140111	谢家伟	20082019谢家伟	独立董事	1		邱大梁	20082019邱大梁	独立董事	1	1	张建群	20082019张建群	副董事长,副总经理	0			20082019	#N/A	0			20082019	#N/A	0			20082019	#N/A	0			20082019	#N/A	0			20082019	#N/A	0			20082019
2009	2010	20092010	广东省	广东	广东2010	#N/A	0.0216352	杨雷	20092010杨雷	董事,总经理	0		邓传洲	20092010邓传洲	独立董事	1	0	蒯建平	20092010蒯建平	独立董事	1	0		20092010	#N/A	0			20092010	#N/A	0			20092010	#N/A	0			20092010	#N/A	0			20092010	#N/A	0			20092010
2009	2011	20092011	广东省	广东	广东2011	#N/A	0.0199093	杨雷	20092011杨雷	董事,总经理	0		邓传洲	20092011邓传洲	独立董事	1	0	蒯建平	20092011蒯建平	独立董事	1	0		20092011	#N/A	0			20092011	#N/A	0			20092011	#N/A	0			20092011	#N/A	0			20092011	#N/A	0			20092011
2009	2012	20092012	广东省	广东	广东2012	0.693147	0.0230561	杨雷	20092012杨雷	董事,总经理	0		邓传洲	20092012邓传洲	独立董事	1	0	蒯建平	20092012蒯建平	独立董事	1	0		20092012	#N/A	0			20092012	#N/A	0			20092012	#N/A	0			20092012	#N/A	0			20092012	#N/A	0			20092012
2011	2016	20112016	浙江省	浙江	浙江2016	1.09861	0.026311	喻波	20112016喻波	副董事长	0			20112016	#N/A	0		陈威如	20112016陈威如	独立董事	1	0		20112016	#N/A	0			20112016	#N/A	0			20112016	#N/A	0			20112016	#N/A	0			20112016	#N/A	0			20112016
2011	2018	20112018	浙江省	浙江	浙江2018	1.79176	0.0193728	马永义	20112018马永义	独立董事	1		喻波	20112018喻波	副董事长	0		王新2	20112018王新2	#N/A	0			20112018	#N/A	0			20112018	#N/A	0			20112018	#N/A	0			20112018	#N/A	0			20112018	#N/A	0			20112018
2012	2010	20122010	浙江省	浙江	浙江2010	#N/A	0.0187642	费忠新	20122010费忠新	独立董事	1		顾飞鹰	20122010顾飞鹰	董事	0		曾与平	20122010曾与平	独立董事	1	0		20122010	#N/A	0			20122010	#N/A	0			20122010	#N/A	0			20122010	#N/A	0			20122010	#N/A	0			20122010
2012	2016	20122016	浙江省	浙江	浙江2016	1.09861	0.026311	俞波	20122016俞波	独立董事	1		杨清	20122016杨清	#N/A	0		余庆兵	20122016余庆兵	独立董事	1	0		20122016	#N/A	0			20122016	#N/A	0			20122016	#N/A	0			20122016	#N/A	0			20122016	#N/A	0			20122016
2012	2017	20122017	浙江省	浙江	浙江2017	1.09861	0.0181469	俞波	20122017俞波	独立董事	1	1	杜简丞	20122017杜简丞	董事长,董事	0		余庆兵	20122017余庆兵	独立董事	1	0		20122017	#N/A	0			20122017	#N/A	0			20122017	#N/A	0			20122017	#N/A	0			20122017	#N/A	0			20122017
2012	2019	20122019	浙江省	浙江	浙江2019	4.81218	0.0120027	俞波	20122019俞波	独立董事	1	1	刘溪	20122019刘溪	董事长,总经理	0		龚志忠	20122019龚志忠	独立董事	1	0		20122019	#N/A	0			20122019	#N/A	0			20122019	#N/A	0			20122019	#N/A	0			20122019	#N/A	0			20122019
2013	2016	20132016	浙江省	浙江	浙江2016	1.09861	0.026311	张国华	20132016张国华	独立董事	1		刘骏民	20132016刘骏民	独立董事	1	0	颜冬	20132016颜冬	董事	0			20132016	#N/A	0			20132016	#N/A	0			20132016	#N/A	0			20132016	#N/A	0			20132016	#N/A	0			20132016
2013	2017	20132017	浙江省	浙江	浙江2017	1.09861	0.0181469	张国华	20132017张国华	独立董事	1		刘骏民	20132017刘骏民	独立董事	1	0	刘蓉	20132017刘蓉	董事	0			20132017	#N/A	0			20132017	#N/A	0			20132017	#N/A	0			20132017	#N/A	0			20132017	#N/A	0			20132017
2013	2019	20132019	浙江省	浙江	浙江2019	4.81218	0.0120027	张国华	20132019张国华	独立董事	1		周春华	20132019周春华	董事	0		景旭	20132019景旭	独立董事	1	0		20132019	#N/A	0			20132019	#N/A	0			20132019	#N/A	0			20132019	#N/A	0			20132019	#N/A	0			20132019
2013	2020	20132020	浙江省	浙江	浙江2020	4.26268	0.0131053	张国华	20132020张国华	独立董事	1		周春华	20132020周春华	董事	0		景旭	20132020景旭	独立董事	1	0		20132020	#N/A	0			20132020	#N/A	0			20132020	#N/A	0			20132020	#N/A	0			20132020	#N/A	0			20132020
2014	2013	20142013	浙江省	浙江	浙江2013	#N/A	0.0203306	周亚娜	20142013周亚娜	独立董事	1		程雁雷	20142013程雁雷	独立董事	1	0	孙毅	20142013孙毅	董事	0			20142013	#N/A	0			20142013	#N/A	0			20142013	#N/A	0			20142013	#N/A	0			20142013	#N/A	0			20142013
2014	2015	20142015	浙江省	浙江	浙江2015	0.693147	0.022429	李晓玲	20142015李晓玲	独立董事	1		程雁雷	20142015程雁雷	独立董事	1	0	孙毅	20142015孙毅	董事	0			20142015	#N/A	0			20142015	#N/A	0			20142015	#N/A	0			20142015	#N/A	0			20142015	#N/A	0			20142015
2014	2016	20142016	安徽省	安徽	安徽2016	3.2581	0.0221311	王斌	20142016王斌	独立董事	1		陈结淼	20142016陈结淼	独立董事	1	0	孙毅	20142016孙毅	董事长	0			20142016	#N/A	0			20142016	#N/A	0			20142016	#N/A	0			20142016	#N/A	0			20142016	#N/A	0			20142016
2017	2014	20172014	安徽省	安徽	安徽2014	1.38629	0.0192843	杨雄	20172014杨雄	独立董事	1		陈静	20172014陈静	独立董事	1	0	郁方	20172014郁方	独立董事	1	0	周忠国	20172014周忠国	董事长,董事,总裁	0		倪首萍	20172014倪首萍	董事	0		陈根洪	20172014陈根洪	董事	0			20172014	#N/A	0			20172014	#N/A	0			20172014
2017	2015	20172015	安徽省	安徽	安徽2015	1.60944	0.0166536	杨雄	20172015杨雄	独立董事	1		袁华生	20172015袁华生	独立董事	1	0	郁方	20172015郁方	独立董事	1	0	周忠国	20172015周忠国	董事长,总裁,董事	0		倪首萍	20172015倪首萍	董事	0		陈根洪	20172015陈根洪	董事	0			20172015	#N/A	0			20172015	#N/A	0			20172015
2017	2016	20172016	安徽省	安徽	安徽2016	3.2581	0.0221311	杨雄	20172016杨雄	独立董事	1		郑晓东	20172016郑晓东	独立董事	1	0	郁方	20172016郁方	独立董事	1	0	周忠国	20172016周忠国	董事长	0		倪首萍	20172016倪首萍	董事	0		陈根洪	20172016陈根洪	董事	0			20172016	#N/A	0			20172016	#N/A	0			20172016
2017	2017	20172017	安徽省	安徽	安徽2017	3.43399	0.0173611	邓川	20172017邓川	独立董事	1		郁方	20172017郁方	独立董事	1	0	郑晓东	20172017郑晓东	独立董事	1	0	周忠国	20172017周忠国	董事长	0		倪首萍	20172017倪首萍	董事	0		陈根洪	20172017陈根洪	董事	0			20172017	#N/A	0			20172017	#N/A	0			20172017
2017	2018	20172018	安徽省	安徽	安徽2018	2.3979	0.0204296	邓川	20172018邓川	独立董事	1		郁方	20172018郁方	独立董事	1	0	郑晓东	20172018郑晓东	独立董事	1	0	周忠国	20172018周忠国	董事长	0		倪首萍	20172018倪首萍	董事	0		陈根洪	20172018陈根洪	董事	0			20172018	#N/A	0			20172018	#N/A	0			20172018
2020	2010	20202010	浙江省	浙江	浙江2010	#N/A	0.0187642	史习民	20202010史习民	独立董事	1		徐小明	20202010徐小明	董事,董事会秘书	0		周伟澄	20202010周伟澄	独立董事	1	0		20202010	#N/A	0			20202010	#N/A	0			20202010	#N/A	0			20202010	#N/A	0			20202010	#N/A	0			20202010
2022	2013	20222013	上海市	上海	上海2013	0.693147	0.0166153	方斌	20222013方斌	独立董事	1		刘春彦	20222013刘春彦	独立董事	1	0	唐伟国	20222013唐伟国	董事长	0			20222013	#N/A	0			20222013	#N/A	0			20222013	#N/A	0			20222013	#N/A	0			20222013	#N/A	0			20222013
2022	2017	20222017	上海市	上海	上海2017	2.56495	0.0153257	吕秋萍	20222017吕秋萍	独立董事	1		杨磊	20222017杨磊	独立董事	1	0	唐桢博	20222017唐桢博	董事	0			20222017	#N/A	0			20222017	#N/A	0			20222017	#N/A	0			20222017	#N/A	0			20222017	#N/A	0			20222017
2022	2018	20222018	上海市	上海	上海2018	3.3322	0.0169541	吕秋萍	20222018吕秋萍	独立董事	1		杨磊	20222018杨磊	独立董事	1	1	唐桢博	20222018唐桢博	董事	0			20222018	#N/A	0			20222018	#N/A	0			20222018	#N/A	0			20222018	#N/A	0			20222018	#N/A	0			20222018
2027	2020	20272020	广东省	广东	广东2020	2.83321	0.0174561	葛明	20272020葛明	独立董事	1	1	卓福民	20272020卓福民	独立董事	1	1	孔微微	20272020孔微微	副董事长,副总裁,首席财务官,董事会秘书	0			20272020	#N/A	0			20272020	#N/A	0			20272020	#N/A	0			20272020	#N/A	0			20272020	#N/A	0			20272020
2028	2020	20282020	上海市	上海	上海2020	2.19722	0.0178784	赵世君	20282020赵世君	独立董事	1		秦正余	20282020秦正余	独立董事	1	0	张家荣	20282020张家荣	董事	0			20282020	#N/A	0			20282020	#N/A	0			20282020	#N/A	0			20282020	#N/A	0			20282020	#N/A	0			20282020
2029	2021	20292021	福建省	福建	福建2021	8.30746	0.0199173	赵蓓	20292021赵蓓	独立董事	1		周永伟	20292021周永伟	董事	0		吴育辉	20292021吴育辉	独立董事	1	0		20292021	#N/A	0			20292021	#N/A	0			20292021	#N/A	0			20292021	#N/A	0			20292021	#N/A	0			20292021
2030	2011	20302011	福建省	福建	福建2011	0.693147	0.0172949		20302011	#N/A	0			20302011	#N/A	0			20302011	#N/A	0			20302011	#N/A	0			20302011	#N/A	0			20302011	#N/A	0			20302011	#N/A	0			20302011	#N/A	0			20302011
2030	2012	20302012	广东省	广东	广东2012	0.693147	0.0230561		20302012	#N/A	0			20302012	#N/A	0			20302012	#N/A	0			20302012	#N/A	0			20302012	#N/A	0			20302012	#N/A	0			20302012	#N/A	0			20302012	#N/A	0			20302012
2030	2013	20302013	广东省	广东	广东2013	#N/A	0.0237707	胡志勇	20302013胡志勇	独立董事	1		王华东	20302013王华东	独立董事	1	0	吴翠玲	20302013吴翠玲	副董事长	0			20302013	#N/A	0			20302013	#N/A	0			20302013	#N/A	0			20302013	#N/A	0			20302013	#N/A	0			20302013
2030	2014	20302014	广东省	广东	广东2014	#N/A	0.0224623	胡志勇	20302014胡志勇	独立董事	1		王华东	20302014王华东	独立董事	1	0	吴翠玲	20302014吴翠玲	副董事长	0			20302014	#N/A	0			20302014	#N/A	0			20302014	#N/A	0			20302014	#N/A	0			20302014	#N/A	0			20302014
2035	2014	20352014	广东省	广东	广东2014	#N/A	0.0224623	赵述强	20352014赵述强	独立董事	1		李洪峰	20352014李洪峰	独立董事	1	0	潘叶江	20352014潘叶江	副董事长,副总裁	0			20352014	#N/A	0			20352014	#N/A	0			20352014	#N/A	0			20352014	#N/A	0			20352014	#N/A	0			20352014
2035	2016	20352016	广东省	广东	广东2016	1.94591	0.0237664	赵述强	20352016赵述强	独立董事	1		李洪峰	20352016李洪峰	独立董事	1	0	潘叶江	20352016潘叶江	董事长	0			20352016	#N/A	0			20352016	#N/A	0			20352016	#N/A	0			20352016	#N/A	0			20352016	#N/A	0			20352016
2035	2018	20352018	广东省	广东	广东2018	2.56495	0.0175543	赵述强	20352018赵述强	独立董事	1		李洪峰	20352018李洪峰	独立董事	1	0	潘叶江	20352018潘叶江	董事长	0			20352018	#N/A	0			20352018	#N/A	0			20352018	#N/A	0			20352018	#N/A	0			20352018	#N/A	0			20352018
2035	2020	20352020	广东省	广东	广东2020	2.83321	0.0174561	周谊	20352020周谊	独立董事	1		丁云龙	20352020丁云龙	独立董事	1	0	潘叶江	20352020潘叶江	董事长	0			20352020	#N/A	0			20352020	#N/A	0			20352020	#N/A	0			20352020	#N/A	0			20352020	#N/A	0			20352020
2036	2014	20362014	广东省	广东	广东2014	#N/A	0.0224623	包新民	20362014包新民	独立董事	1		李彤	20362014李彤	独立董事	1	0	王青	20362014王青	董事	0			20362014	#N/A	0			20362014	#N/A	0			20362014	#N/A	0			20362014	#N/A	0			20362014	#N/A	0			20362014
2036	2015	20362015	广东省	广东	广东2015	0.693147	0.0185536	包新民	20362015包新民	独立董事	1		李彤	20362015李彤	独立董事	1	0	王青	20362015王青	董事	0			20362015	#N/A	0			20362015	#N/A	0			20362015	#N/A	0			20362015	#N/A	0			20362015	#N/A	0			20362015
2036	2016	20362016	广东省	广东	广东2016	1.94591	0.0237664	李宁	20362016李宁	独立董事	1		包新民	20362016包新民	独立董事	1	0	陆繁荣	20362016陆繁荣	非独立董事,常务副总经理	0			20362016	#N/A	0			20362016	#N/A	0			20362016	#N/A	0			20362016	#N/A	0			20362016	#N/A	0			20362016
2036	2017	20362017	江西省	江西	江西2017	0.693147	0.0235461	李宁	20362017李宁	独立董事	1		包新民	20362017包新民	独立董事	1	0	陆繁荣	20362017陆繁荣	非独立董事,常务副总经理	0			20362017	#N/A	0			20362017	#N/A	0			20362017	#N/A	0			20362017	#N/A	0			20362017	#N/A	0			20362017
2036	2022	20362022	江西省	江西	江西2022	8.85181	0.0175004	罗顺根	20362022罗顺根	非独立董事,高级副总裁	0		刘卫东	20362022刘卫东	独立董事	1	0	饶立新	20362022饶立新	独立董事	1	0		20362022	#N/A	0			20362022	#N/A	0			20362022	#N/A	0			20362022	#N/A	0			20362022	#N/A	0			20362022
2037	2016	20372016	江西省	江西	江西2016	#N/A	0.0204209	王新华	20372016王新华	独立董事	1		王丽春	20372016王丽春	董事,董事会秘书	0		张瑞彬	20372016张瑞彬	独立董事	1	0		20372016	#N/A	0			20372016	#N/A	0			20372016	#N/A	0			20372016	#N/A	0			20372016	#N/A	0			20372016
2037	2017	20372017	江西省	江西	江西2017	0.693147	0.0235461	王新华	20372017王新华	独立董事	1		王丽春	20372017王丽春	董事,董事会秘书	0		张瑞彬	20372017张瑞彬	独立董事	1	0		20372017	#N/A	0			20372017	#N/A	0			20372017	#N/A	0			20372017	#N/A	0			20372017	#N/A	0			20372017
2039	2019	20392019	贵州省	贵州	贵州2019	1.09861	0.0225218	王强	20392019王强	独立董事	1		张建军	20392019张建军	非独立董事	0		张志康	20392019张志康	独立董事	1	0		20392019	#N/A	0			20392019	#N/A	0			20392019	#N/A	0			20392019	#N/A	0			20392019	#N/A	0			20392019
2039	2020	20392020	贵州省	贵州	贵州2020	1.09861	0.0163507	王强	20392020王强	独立董事	1	1	张建军	20392020张建军	非独立董事	0		张志康	20392020张志康	独立董事	1	0		20392020	#N/A	0			20392020	#N/A	0			20392020	#N/A	0			20392020	#N/A	0			20392020	#N/A	0			20392020
2039	2022	20392022	贵州省	贵州	贵州2022	8.54169	0.0191603	祝韻	20392022祝韻	独立董事	1		张建军	20392022张建军	非独立董事	0		程亭	20392022程亭	独立董事	1	0		20392022	#N/A	0			20392022	#N/A	0			20392022	#N/A	0			20392022	#N/A	0			20392022	#N/A	0			20392022
2040	2010	20402010	贵州省	贵州	贵州2010	#N/A	0.0203967	陈冬华	20402010陈冬华	独立董事	1		刘俊	20402010刘俊	独立董事	1	0	章俊	20402010章俊	董事长	0			20402010	#N/A	0			20402010	#N/A	0			20402010	#N/A	0			20402010	#N/A	0			20402010	#N/A	0			20402010
2040	2020	20402020	贵州省	贵州	贵州2020	1.09861	0.0163507	耿成轩	20402020耿成轩	独立董事	1		马野青	20402020马野青	独立董事	1	0	熊俊	20402020熊俊	董事长	0			20402020	#N/A	0			20402020	#N/A	0			20402020	#N/A	0			20402020	#N/A	0			20402020	#N/A	0			20402020
2041	2011	20412011	山东省	山东	山东2011	#N/A	0.0214811	张凤山	20412011张凤山	独立董事	1		王寰邦	20412011王寰邦	董事	0		赵久然	20412011赵久然	独立董事	1	0		20412011	#N/A	0			20412011	#N/A	0			20412011	#N/A	0			20412011	#N/A	0			20412011	#N/A	0			20412011
2041	2012	20412012	山东省	山东	山东2012	0.693147	0.0142408	张凤山	20412012张凤山	独立董事	1		王寰邦	20412012王寰邦	董事	0		赵久然	20412012赵久然	独立董事	1	0		20412012	#N/A	0			20412012	#N/A	0			20412012	#N/A	0			20412012	#N/A	0			20412012	#N/A	0			20412012
2042	2011	20422011	安徽省	安徽	安徽2011	0.693147	0.0177839	刘雪生	20422011刘雪生	独立董事	1		吴镝	20422011吴镝	独立董事	1	0	张际松	20422011张际松	董事	0			20422011	#N/A	0			20422011	#N/A	0			20422011	#N/A	0			20422011	#N/A	0			20422011	#N/A	0			20422011
2042	2018	20422018	安徽省	安徽	安徽2018	2.3979	0.0204296	孔祥云	20422018孔祥云	独立董事	1		程桂松	20422018程桂松	董事,副总裁	0		胡永峰	20422018胡永峰	独立董事	1	0		20422018	#N/A	0			20422018	#N/A	0			20422018	#N/A	0			20422018	#N/A	0			20422018	#N/A	0			20422018
2042	2020	20422020	安徽省	安徽	安徽2020	4.69135	0.011744	孔祥云	20422020孔祥云	独立董事	1		程桂松	20422020程桂松	董事,副总裁	0		陈卫滨	20422020陈卫滨	独立董事	1	0		20422020	#N/A	0			20422020	#N/A	0			20422020	#N/A	0			20422020	#N/A	0			20422020	#N/A	0			20422020
2043	2019	20432019	安徽省	安徽	安徽2019	3.4012	0.0163229	吴晖	20432019吴晖	独立董事	1	1	韩灵丽	20432019韩灵丽	独立董事	1	0	姚红霞	20432019姚红霞	董事,财务总监	0			20432019	#N/A	0			20432019	#N/A	0			20432019	#N/A	0			20432019	#N/A	0			20432019	#N/A	0			20432019
2043	2020	20432020	安徽省	安徽	安徽2020	4.69135	0.011744	苏新建	20432020苏新建	独立董事	1		姚红霞	20432020姚红霞	财务总监,董事	0		吴晖	20432020吴晖	独立董事	1	1		20432020	#N/A	0			20432020	#N/A	0			20432020	#N/A	0			20432020	#N/A	0			20432020	#N/A	0			20432020
2044	2018	20442018	江苏省	江苏	江苏2018	2.56495	0.0202007	郭美玲	20442018郭美玲	副董事长	0		冯军元	20442018冯军元	非独立董事	0		李俊德	20442018李俊德	董事	0		肖志兴	20442018肖志兴	独立董事	1	0	刘勇	20442018刘勇	独立董事	1	0	葛俊	20442018葛俊	独立董事	1	0		20442018	#N/A	0		刘晓	20442018刘晓	独立董事	1	0		20442018
2045	2016	20452016	江苏省	江苏	江苏2016	0.693147	0.0231946	刘杰生	20452016刘杰生	独立董事	1		郭飏	20452016郭飏	独立董事	1	0	沈肇章	20452016沈肇章	独立董事	1	0	郝旭明	20452016郝旭明	董事长	0		郑崖民	20452016郑崖民	董事,副总裁,财务总监,董事会秘书	0			20452016	#N/A	0			20452016	#N/A	0			20452016	#N/A	0			20452016
2045	2018	20452018	江苏省	江苏	江苏2018	2.56495	0.0202007	刘杰生	20452018刘杰生	独立董事	1		郭飏	20452018郭飏	独立董事	1	0	沈肇章	20452018沈肇章	独立董事	1	0	郝旭明	20452018郝旭明	副董事长,董事长	0		郑崖民	20452018郑崖民	董事,副总裁,财务总监	0			20452018	#N/A	0			20452018	#N/A	0			20452018	#N/A	0			20452018
2046	2022	20462022	河南省	河南	河南2022	9.05439	0.0131279	孙振华	20462022孙振华	独立董事	1		蒋蔚	20462022蒋蔚	党委书记,董事长,总经理,非独立董事	0		马坚	20462022马坚	非独立董事	0		王怀书	20462022王怀书	独立董事	1	0	王波	20462022王波	独立董事	1	0		20462022	#N/A	0			20462022	#N/A	0			20462022	#N/A	0			20462022
2049	2016	20492016	河北省	河北	河北2016	#N/A	0.0292976	曹阳	20492016曹阳	独立董事	1		陈金占	20492016陈金占	独立董事	1	0	高启全	20492016高启全	董事	0			20492016	#N/A	0			20492016	#N/A	0			20492016	#N/A	0			20492016	#N/A	0			20492016	#N/A	0			20492016
2049	2021	20492021	河北省	河北	河北2021	9.17181	0.0219136	王立彦	20492021王立彦	独立董事	1		黄文玉	20492021黄文玉	独立董事	1	0	吴胜武	20492021吴胜武	非独立董事	0			20492021	#N/A	0			20492021	#N/A	0			20492021	#N/A	0			20492021	#N/A	0			20492021	#N/A	0			20492021
2052	2017	20522017	北京市	北京	北京2017	#N/A	0.0270469	潘玲曼	20522017潘玲曼	独立董事	1		欧阳建国	20522017欧阳建国	独立董事	1	0		20522017	#N/A	0			20522017	#N/A	0			20522017	#N/A	0			20522017	#N/A	0			20522017	#N/A	0			20522017	#N/A	0			20522017
2052	2018	20522018	北京市	北京	北京2018	1.79176	0.028059	潘玲曼	20522018潘玲曼	独立董事	1		欧阳建国	20522018欧阳建国	独立董事	1	0		20522018	#N/A	0			20522018	#N/A	0			20522018	#N/A	0			20522018	#N/A	0			20522018	#N/A	0			20522018	#N/A	0			20522018
2052	2020	20522020	北京市	北京	北京2020	2.3979	0.022133	潘玲曼	20522020潘玲曼	独立董事	1		欧阳建国	20522020欧阳建国	独立董事	1	0	刘灿	20522020刘灿	董事,董事长	0			20522020	#N/A	0			20522020	#N/A	0			20522020	#N/A	0			20522020	#N/A	0			20522020	#N/A	0			20522020
2054	2015	20542015	广东省	广东	广东2015	0.693147	0.0185536	徐滨	20542015徐滨	独立董事	1		张宏斌	20542015张宏斌	独立董事	1	0	宋琪	20542015宋琪	董事	0			20542015	#N/A	0			20542015	#N/A	0			20542015	#N/A	0			20542015	#N/A	0			20542015	#N/A	0			20542015
2054	2016	20542016	广东省	广东	广东2016	1.94591	0.0237664	徐滨	20542016徐滨	独立董事	1		张宏斌	20542016张宏斌	独立董事	1	0	宋琪	20542016宋琪	董事	0			20542016	#N/A	0			20542016	#N/A	0			20542016	#N/A	0			20542016	#N/A	0			20542016	#N/A	0			20542016
2054	2019	20542019	广东省	广东	广东2019	2.77259	0.0140111	丁海芳	20542019丁海芳	独立董事	1		宋琪	20542019宋琪	董事	0		GUO XIN	20542019GUO XIN	独立董事	1	0		20542019	#N/A	0			20542019	#N/A	0			20542019	#N/A	0			20542019	#N/A	0			20542019	#N/A	0			20542019
2056	2014	20562014	浙江省	浙江	浙江2014	#N/A	0.0278689	钱娟萍	20562014钱娟萍	独立董事	1		季国平	20562014季国平	独立董事	1	0	胡天高	20562014胡天高	董事	0			20562014	#N/A	0			20562014	#N/A	0			20562014	#N/A	0			20562014	#N/A	0			20562014	#N/A	0			20562014
2057	2012	20572012	浙江省	浙江	浙江2012	#N/A	0.019422	席彦群	20572012席彦群	独立董事	1		钱国安	20572012钱国安	独立董事	1	0	虞夏	20572012虞夏	董事	0			20572012	#N/A	0			20572012	#N/A	0			20572012	#N/A	0			20572012	#N/A	0			20572012	#N/A	0			20572012
2057	2015	20572015	浙江省	浙江	浙江2015	0.693147	0.022429	汪家常	20572015汪家常	独立董事	1		钱国安	20572015钱国安	独立董事	1	0	虞夏	20572015虞夏	董事	0			20572015	#N/A	0			20572015	#N/A	0			20572015	#N/A	0			20572015	#N/A	0			20572015	#N/A	0			20572015
2059	2023	20592023	浙江省	浙江	浙江2023	9.74326	#N/A	杨向红	20592023杨向红	独立董事	1		吴通	20592023吴通	非独立董事	0		李小军	20592023李小军	独立董事	1	0		20592023	#N/A	0			20592023	#N/A	0			20592023	#N/A	0			20592023	#N/A	0			20592023	#N/A	0			20592023
2060	2010	20602010	浙江省	浙江	浙江2010	#N/A	0.0187642	曾陈平	20602010曾陈平	董事,副总经理	0		李光	20602010李光	独立董事	1	0	钟敏	20602010钟敏	独立董事	1	0		20602010	#N/A	0			20602010	#N/A	0			20602010	#N/A	0			20602010	#N/A	0			20602010	#N/A	0			20602010
2060	2018	20602018	浙江省	浙江	浙江2018	1.79176	0.0193728	彭松	20602018彭松	独立董事	1	1	曾陈平	20602018曾陈平	董事,副总经理	0		黄声森	20602018黄声森	独立董事	1	0		20602018	#N/A	0			20602018	#N/A	0			20602018	#N/A	0			20602018	#N/A	0			20602018	#N/A	0			20602018
2061	2014	20612014	浙江省	浙江	浙江2014	#N/A	0.0278689	于永生	20612014于永生	独立董事	1		蒋国良	20612014蒋国良	独立董事	1	0	孙勤芳	20612014孙勤芳	董事	0			20612014	#N/A	0			20612014	#N/A	0			20612014	#N/A	0			20612014	#N/A	0			20612014	#N/A	0			20612014
2062	2012	20622012	浙江省	浙江	浙江2012	#N/A	0.019422	范松林	20622012范松林	独立董事	1		王祖龙	20622012王祖龙	独立董事	1	0	何秀永	20622012何秀永	董事,副总经理	0			20622012	#N/A	0			20622012	#N/A	0			20622012	#N/A	0			20622012	#N/A	0			20622012	#N/A	0			20622012
2062	2019	20622019	浙江省	浙江	浙江2019	4.81218	0.0120027	张建明	20622019张建明	独立董事	1		程骁	20622019程骁	独立董事	1	0	赵余夫	20622019赵余夫	董事,副总经理,董事会秘书	0			20622019	#N/A	0			20622019	#N/A	0			20622019	#N/A	0			20622019	#N/A	0			20622019	#N/A	0			20622019
2062	2020	20622020	浙江省	浙江	浙江2020	4.26268	0.0131053	周国良	20622020周国良	独立董事	1		张丽明	20622020张丽明	独立董事	1	0	赵余夫	20622020赵余夫	董事,副总经理	0			20622020	#N/A	0			20622020	#N/A	0			20622020	#N/A	0			20622020	#N/A	0			20622020	#N/A	0			20622020
2063	2010	20632010	广东省	广东	广东2010	#N/A	0.0216352	黄建元	20632010黄建元	副董事长,常务副总裁	0		刘友夫	20632010刘友夫	#N/A	0		温烨	20632010温烨	独立董事	1	0	卫建国	20632010卫建国	独立董事	1	0		20632010	#N/A	0			20632010	#N/A	0			20632010	#N/A	0			20632010	#N/A	0			20632010
2063	2012	20632012	广东省	广东	广东2012	0.693147	0.0230561	卫建国	20632012卫建国	独立董事	1		温烨	20632012温烨	独立董事	1	0		20632012	#N/A	0			20632012	#N/A	0			20632012	#N/A	0			20632012	#N/A	0			20632012	#N/A	0			20632012	#N/A	0			20632012
2064	2017	20642017	浙江省	浙江	浙江2017	1.09861	0.0181469	潘彬	20642017潘彬	独立董事	1		陈林真	20642017陈林真	副董事长,董事	0		朱勤	20642017朱勤	独立董事	1	0		20642017	#N/A	0			20642017	#N/A	0			20642017	#N/A	0			20642017	#N/A	0			20642017	#N/A	0			20642017
2065	2012	20652012	北京市	北京	北京2012	#N/A	0.0180667	蒋力	20652012蒋力	独立董事	1		吴淼	20652012吴淼	独立董事	1	1	杨健	20652012杨健	董事,董事会秘书,财务总监	0			20652012	#N/A	0			20652012	#N/A	0			20652012	#N/A	0			20652012	#N/A	0			20652012	#N/A	0			20652012
2065	2017	20652017	北京市	北京	北京2017	#N/A	0.0270469	李燕	20652017李燕	独立董事	1		林中	20652017林中	独立董事	1	0	杨健	20652017杨健	董事,副总经理,董事会秘书	0			20652017	#N/A	0			20652017	#N/A	0			20652017	#N/A	0			20652017	#N/A	0			20652017	#N/A	0			20652017
2065	2018	20652018	北京市	北京	北京2018	1.79176	0.028059	李燕	20652018李燕	独立董事	1		林中	20652018林中	独立董事	1	0	杨健	20652018杨健	董事,副总经理,董事会秘书	0			20652018	#N/A	0			20652018	#N/A	0			20652018	#N/A	0			20652018	#N/A	0			20652018	#N/A	0			20652018
2066	2010	20662010	北京市	北京	北京2010	0.693147	0.0194632	胡金亮	20662010胡金亮	独立董事	1		雷前治	20662010雷前治	独立董事	1	0	胡永祥	20662010胡永祥	董事	0			20662010	#N/A	0			20662010	#N/A	0			20662010	#N/A	0			20662010	#N/A	0			20662010	#N/A	0			20662010
2068	2016	20682016	北京市	北京	北京2016	1.09861	0.0311098	包汉华	20682016包汉华	独立董事	1		陈天助	20682016陈天助	独立董事	1	0	李保泉	20682016李保泉	副董事长	0			20682016	#N/A	0			20682016	#N/A	0			20682016	#N/A	0			20682016	#N/A	0			20682016	#N/A	0			20682016
2068	2017	20682017	北京市	北京	北京2017	#N/A	0.0270469	方彬福	20682017方彬福	独立董事	1		陈天助	20682017陈天助	独立董事	1	0	李保泉	20682017李保泉	副董事长	0			20682017	#N/A	0			20682017	#N/A	0			20682017	#N/A	0			20682017	#N/A	0			20682017	#N/A	0			20682017
2069	2013	20692013	辽宁省	辽宁	辽宁2013	#N/A	0.0219805	方红星	20692013方红星	独立董事	1		吴晓巍	20692013吴晓巍	独立董事	1	0	柳承芳	20692013柳承芳	董事	0			20692013	#N/A	0			20692013	#N/A	0			20692013	#N/A	0			20692013	#N/A	0			20692013	#N/A	0			20692013
2069	2014	20692014	辽宁省	辽宁	辽宁2014	#N/A	0.0178731	方红星	20692014方红星	独立董事	1		吴晓巍	20692014吴晓巍	独立董事	1	0	柳承芳	20692014柳承芳	董事	0			20692014	#N/A	0			20692014	#N/A	0			20692014	#N/A	0			20692014	#N/A	0			20692014	#N/A	0			20692014
2069	2015	20692015	辽宁省	辽宁	辽宁2015	#N/A	0.0169668		20692015	#N/A	0		吴晓巍	20692015吴晓巍	独立董事	1	0	柳承芳	20692015柳承芳	董事	0			20692015	#N/A	0			20692015	#N/A	0			20692015	#N/A	0			20692015	#N/A	0			20692015	#N/A	0			20692015
2071	2015	20712015	辽宁省	辽宁	辽宁2015	#N/A	0.0169668		20712015	#N/A	0		俞乐平	20712015俞乐平	独立董事	1	0	宓强	20712015宓强	董事,总经理	0			20712015	#N/A	0			20712015	#N/A	0			20712015	#N/A	0			20712015	#N/A	0			20712015	#N/A	0			20712015
2072	2017	20722017	山东省	山东	山东2017	2.07944	0.0146452	张林剑	20722017张林剑	独立董事	1		晏小平	20722017晏小平	独立董事	1	0	张培峰	20722017张培峰	董事长	0			20722017	#N/A	0			20722017	#N/A	0			20722017	#N/A	0			20722017	#N/A	0			20722017	#N/A	0			20722017
2072	2022	20722022	湖北省	湖北	湖北2022	9.11085	0.0139883	范晓亮	20722022范晓亮	独立董事	1		纪晓文	20722022纪晓文	董事长	0			20722022	#N/A	0			20722022	#N/A	0			20722022	#N/A	0			20722022	#N/A	0			20722022	#N/A	0			20722022	#N/A	0			20722022
2074	2018	20742018	江苏省	江苏	江苏2018	2.56495	0.0202007	王志台	20742018王志台	独立董事	1		盛扬	20742018盛扬	独立董事	1	0	胡江林	20742018胡江林	董事,常务副总经理	0			20742018	#N/A	0			20742018	#N/A	0			20742018	#N/A	0			20742018	#N/A	0			20742018	#N/A	0			20742018
2076	2012	20762012	江苏省	江苏	江苏2012	#N/A	0.0197756	邬筠春	20762012邬筠春	独立董事	1		陈宏民	20762012陈宏民	独立董事	1	0	冼树忠	20762012冼树忠	董事,董事会秘书	0			20762012	#N/A	0			20762012	#N/A	0			20762012	#N/A	0			20762012	#N/A	0			20762012	#N/A	0			20762012
2080	2015	20802015	江苏省	江苏	江苏2015	#N/A	0.0237915	李东昕	20802015李东昕	#N/A	0		李新华	20802015李新华	董事	0		陆风雷	20802015陆风雷	独立董事	1	0		20802015	#N/A	0			20802015	#N/A	0			20802015	#N/A	0			20802015	#N/A	0			20802015	#N/A	0			20802015
2080	2016	20802016	江苏省	江苏	江苏2016	0.693147	0.0231946	李东昕	20802016李东昕	#N/A	0		李新华	20802016李新华	董事	0		陆风雷	20802016陆风雷	独立董事	1	0		20802016	#N/A	0			20802016	#N/A	0			20802016	#N/A	0			20802016	#N/A	0			20802016	#N/A	0			20802016
2080	2017	20802017	江苏省	江苏	江苏2017	2.48491	0.0210849	李东昕	20802017李东昕	#N/A	0		李新华	20802017李新华	董事	0		陆风雷	20802017陆风雷	独立董事	1	0		20802017	#N/A	0			20802017	#N/A	0			20802017	#N/A	0			20802017	#N/A	0			20802017	#N/A	0			20802017
2080	2018	20802018	江苏省	江苏	江苏2018	2.56495	0.0202007	乐超军	20802018乐超军	独立董事	1		薛忠民	20802018薛忠民	董事长	0		李文华	20802018李文华	独立董事	1	0		20802018	#N/A	0			20802018	#N/A	0			20802018	#N/A	0			20802018	#N/A	0			20802018	#N/A	0			20802018
2080	2020	20802020	江苏省	江苏	江苏2020	3.17805	0.0181944	乐超军	20802020乐超军	独立董事	1		薛忠民	20802020薛忠民	董事长	0		李文华	20802020李文华	独立董事	1	0		20802020	#N/A	0			20802020	#N/A	0			20802020	#N/A	0			20802020	#N/A	0			20802020	#N/A	0			20802020
2081	2012	20812012	江苏省	江苏	江苏2012	#N/A	0.0197756	万解秋	20812012万解秋	#N/A	0		严多林	20812012严多林	董事,常务副总经理,财务总监	0		俞雪华	20812012俞雪华	#N/A	0			20812012	#N/A	0			20812012	#N/A	0			20812012	#N/A	0			20812012	#N/A	0			20812012	#N/A	0			20812012
2081	2013	20812013	江苏省	江苏	江苏2013	#N/A	0.0259388	龚菊明	20812013龚菊明	独立董事	1		赵增耀	20812013赵增耀	独立董事	1	0	罗承云	20812013罗承云	董事,副总经理,董事会秘书	0			20812013	#N/A	0			20812013	#N/A	0			20812013	#N/A	0			20812013	#N/A	0			20812013	#N/A	0			20812013
2081	2014	20812014	江苏省	江苏	江苏2014	#N/A	0.0247383	龚菊明	20812014龚菊明	独立董事	1		赵增耀	20812014赵增耀	独立董事	1	0	罗承云	20812014罗承云	董事,副总经理,董事会秘书	0			20812014	#N/A	0			20812014	#N/A	0			20812014	#N/A	0			20812014	#N/A	0			20812014	#N/A	0			20812014
2081	2017	20812017	江苏省	江苏	江苏2017	2.48491	0.0210849	俞雪华	20812017俞雪华	独立董事	1		万解秋	20812017万解秋	独立董事	1	0	严多林	20812017严多林	董事,常务副总经理	0			20812017	#N/A	0			20812017	#N/A	0			20812017	#N/A	0			20812017	#N/A	0			20812017	#N/A	0			20812017
2082	2013	20822013	浙江省	浙江	浙江2013	#N/A	0.0203306	文献军	20822013文献军	独立董事	1		周军强	20822013周军强	董事	0		许宏印	20822013许宏印	独立董事	1	0		20822013	#N/A	0			20822013	#N/A	0			20822013	#N/A	0			20822013	#N/A	0			20822013	#N/A	0			20822013
2082	2014	20822014	浙江省	浙江	浙江2014	#N/A	0.0278689	邬崇国	20822014邬崇国	独立董事	1		何江良	20822014何江良	独立董事	1	1	周军强	20822014周军强	董事	0			20822014	#N/A	0			20822014	#N/A	0			20822014	#N/A	0			20822014	#N/A	0			20822014	#N/A	0			20822014
2082	2016	20822016	浙江省	浙江	浙江2016	1.09861	0.026311	邬崇国	20822016邬崇国	独立董事	1		何江良	20822016何江良	独立董事	1	1	周军强	20822016周军强	董事	0			20822016	#N/A	0			20822016	#N/A	0			20822016	#N/A	0			20822016	#N/A	0			20822016	#N/A	0			20822016
2085	2015	20852015	浙江省	浙江	浙江2015	0.693147	0.022429	孙大建	20852015孙大建	独立董事	1			20852015	#N/A	0		陈爱莲	20852015陈爱莲	董事长	0			20852015	#N/A	0			20852015	#N/A	0			20852015	#N/A	0			20852015	#N/A	0			20852015	#N/A	0			20852015
2087	2012	20872012	浙江省	浙江	浙江2012	#N/A	0.019422	张进才	20872012张进才	独立董事	1		李斌	20872012李斌	独立董事	1	0	许勤芝	20872012许勤芝	董事,副总经理,财务总监,董事会秘书	0		焦子光	20872012焦子光	#N/A	0			20872012	#N/A	0			20872012	#N/A	0			20872012	#N/A	0			20872012	#N/A	0			20872012
2087	2013	20872013	浙江省	浙江	浙江2013	#N/A	0.0203306	李斌	20872013李斌	独立董事	1		华冠雄	20872013华冠雄	独立董事	1	0	张进才	20872013张进才	独立董事	1	0	许勤芝	20872013许勤芝	董事,财务总监,副总经理,董事会秘书	0		徐向阳	20872013徐向阳	董事	0			20872013	#N/A	0			20872013	#N/A	0			20872013	#N/A	0			20872013
2087	2016	20872016	浙江省	浙江	浙江2016	1.09861	0.026311	王咏梅	20872016王咏梅	独立董事	1		华冠雄	20872016华冠雄	独立董事	1	0	马书龙	20872016马书龙	独立董事	1	0	许勤芝	20872016许勤芝	董事,财务总监,副总经理,董事会秘书	0		徐向阳	20872016徐向阳	董事	0			20872016	#N/A	0			20872016	#N/A	0			20872016	#N/A	0			20872016
2089	2015	20892015	浙江省	浙江	浙江2015	0.693147	0.022429	王则斌	20892015王则斌	独立董事	1		徐磊	20892015徐磊	董事,董事会秘书	0		颜重光	20892015颜重光	独立董事	1	0		20892015	#N/A	0			20892015	#N/A	0			20892015	#N/A	0			20892015	#N/A	0			20892015	#N/A	0			20892015
2089	2022	20892022	浙江省	浙江	浙江2022	9.81263	0.013772	李荣林	20892022李荣林	独立董事	1		张亦斌	20892022张亦斌	董事长,总裁	0		冯培	20892022冯培	独立董事	1	0		20892022	#N/A	0			20892022	#N/A	0			20892022	#N/A	0			20892022	#N/A	0			20892022	#N/A	0			20892022
2091	2012	20912012	浙江省	浙江	浙江2012	#N/A	0.019422	楼光华	20912012楼光华	独立董事	1		李国兴	20912012李国兴	独立董事	1	0	王永成	20912012王永成	董事	0			20912012	#N/A	0			20912012	#N/A	0			20912012	#N/A	0			20912012	#N/A	0			20912012	#N/A	0			20912012
2091	2013	20912013	浙江省	浙江	浙江2013	#N/A	0.0203306	楼光华	20912013楼光华	独立董事	1		李国兴	20912013李国兴	独立董事	1	0	王永成	20912013王永成	董事	0			20912013	#N/A	0			20912013	#N/A	0			20912013	#N/A	0			20912013	#N/A	0			20912013	#N/A	0			20912013
2091	2018	20912018	浙江省	浙江	浙江2018	1.79176	0.0193728	张子燕	20912018张子燕	董事长	0		顾建平	20912018顾建平	独立董事	1	1	周中胜	20912018周中胜	独立董事	1	0		20912018	#N/A	0			20912018	#N/A	0			20912018	#N/A	0			20912018	#N/A	0			20912018	#N/A	0			20912018
2094	2014	20942014	山东省	山东	山东2014	3.97029	0.0191943	王荭	20942014王荭	独立董事	1		孙健	20942014孙健	独立董事	1	0	唐风杰	20942014唐风杰	董事,总经理	0			20942014	#N/A	0			20942014	#N/A	0			20942014	#N/A	0			20942014	#N/A	0			20942014	#N/A	0			20942014
2094	2017	20942017	山东省	山东	山东2017	2.07944	0.0146452	王竹泉	20942017王竹泉	独立董事	1		王蕊	20942017王蕊	独立董事	1	0	唐风杰	20942017唐风杰	董事,总经理	0			20942017	#N/A	0			20942017	#N/A	0			20942017	#N/A	0			20942017	#N/A	0			20942017	#N/A	0			20942017
2095	2011	20952011	山东省	山东	山东2011	#N/A	0.0214811	李蓥	20952011李蓥	独立董事	1		蔡宁	20952011蔡宁	独立董事	1	0	寿邹	20952011寿邹	董事,副总经理	0			20952011	#N/A	0			20952011	#N/A	0			20952011	#N/A	0			20952011	#N/A	0			20952011	#N/A	0			20952011
2095	2012	20952012	山东省	山东	山东2012	0.693147	0.0142408	李蓥	20952012李蓥	独立董事	1		蔡宁	20952012蔡宁	独立董事	1	0	寿邹	20952012寿邹	董事,副总经理	0			20952012	#N/A	0			20952012	#N/A	0			20952012	#N/A	0			20952012	#N/A	0			20952012	#N/A	0			20952012
2095	2016	20952016	山东省	山东	山东2016	#N/A	0.0178275	窦明清	20952016窦明清	独立董事	1		俞毅	20952016俞毅	独立董事	1	0	寿邹	20952016寿邹	董事,副总经理	0			20952016	#N/A	0			20952016	#N/A	0			20952016	#N/A	0			20952016	#N/A	0			20952016	#N/A	0			20952016
2095	2017	20952017	山东省	山东	山东2017	2.07944	0.0146452	窦明清	20952017窦明清	独立董事	1		俞毅	20952017俞毅	独立董事	1	0	寿邹	20952017寿邹	董事,副总经理	0			20952017	#N/A	0			20952017	#N/A	0			20952017	#N/A	0			20952017	#N/A	0			20952017	#N/A	0			20952017
2095	2018	20952018	山东省	山东	山东2018	2.3979	0.0165044	窦明清	20952018窦明清	独立董事	1		俞毅	20952018俞毅	独立董事	1	0	寿邹	20952018寿邹	董事,副总经理	0			20952018	#N/A	0			20952018	#N/A	0			20952018	#N/A	0			20952018	#N/A	0			20952018	#N/A	0			20952018
2095	2019	20952019	山东省	山东	山东2019	3.21888	0.0146235	窦明清	20952019窦明清	独立董事	1		俞毅	20952019俞毅	独立董事	1	0	寿邹	20952019寿邹	董事,副总经理	0			20952019	#N/A	0			20952019	#N/A	0			20952019	#N/A	0			20952019	#N/A	0			20952019	#N/A	0			20952019
2095	2020	20952020	山东省	山东	山东2020	3.49651	0.0128581	窦明清	20952020窦明清	独立董事	1		俞毅	20952020俞毅	独立董事	1	0	寿邹	20952020寿邹	董事,副总经理	0			20952020	#N/A	0			20952020	#N/A	0			20952020	#N/A	0			20952020	#N/A	0			20952020	#N/A	0			20952020
2095	2022	20952022	山东省	山东	山东2022	9.28952	0.0154946	李蓥	20952022李蓥	独立董事	1		陈德人	20952022陈德人	独立董事	1	0	寿邹	20952022寿邹	董事,副总经理	0			20952022	#N/A	0			20952022	#N/A	0			20952022	#N/A	0			20952022	#N/A	0			20952022	#N/A	0			20952022
2095	2023	20952023	山东省	山东	山东2023	9.13669	#N/A	李蓥	20952023李蓥	独立董事	1		陈德人	20952023陈德人	独立董事	1	0	寿邹	20952023寿邹	董事,副总经理	0			20952023	#N/A	0			20952023	#N/A	0			20952023	#N/A	0			20952023	#N/A	0			20952023	#N/A	0			20952023
2096	2014	20962014	山东省	山东	山东2014	3.97029	0.0191943	张克东	20962014张克东	独立董事	1		刘宛晨	20962014刘宛晨	独立董事	1	0	寻天衢	20962014寻天衢	董事	0			20962014	#N/A	0			20962014	#N/A	0			20962014	#N/A	0			20962014	#N/A	0			20962014	#N/A	0			20962014
2096	2015	20962015	山东省	山东	山东2015	4.15888	0.0157355	张克东	20962015张克东	独立董事	1		刘宛晨	20962015刘宛晨	独立董事	1	0	寻天衢	20962015寻天衢	董事	0			20962015	#N/A	0			20962015	#N/A	0			20962015	#N/A	0			20962015	#N/A	0			20962015	#N/A	0			20962015
2096	2016	20962016	山东省	山东	山东2016	#N/A	0.0178275	张克东	20962016张克东	独立董事	1		刘宛晨	20962016刘宛晨	独立董事	1	0	寻天衢	20962016寻天衢	董事	0			20962016	#N/A	0			20962016	#N/A	0			20962016	#N/A	0			20962016	#N/A	0			20962016	#N/A	0			20962016
2098	2012	20982012	福建省	福建	福建2012	#N/A	0.0174656	袁新文	20982012袁新文	独立董事	1		黄建忠	20982012黄建忠	独立董事	1	1	赵建	20982012赵建	独立董事	1	0		20982012	#N/A	0			20982012	#N/A	0			20982012	#N/A	0			20982012	#N/A	0			20982012	#N/A	0			20982012
2099	2015	20992015	福建省	福建	福建2015	1.38629	0.0206139	贝念娇	20992015贝念娇	董事	0		周亚力	20992015周亚力	独立董事	1	1	李有星	20992015李有星	独立董事	1	0		20992015	#N/A	0			20992015	#N/A	0			20992015	#N/A	0			20992015	#N/A	0			20992015	#N/A	0			20992015
2099	2017	20992017	浙江省	浙江	浙江2017	1.09861	0.0181469	毛美英	20992017毛美英	独立董事	1		苏为科	20992017苏为科	独立董事	1	1	孙杨	20992017孙杨	董事长	0			20992017	#N/A	0			20992017	#N/A	0			20992017	#N/A	0			20992017	#N/A	0			20992017	#N/A	0			20992017
2099	2018	20992018	浙江省	浙江	浙江2018	1.79176	0.0193728	毛美英	20992018毛美英	独立董事	1		苏为科	20992018苏为科	独立董事	1	1	孙杨	20992018孙杨	董事长	0			20992018	#N/A	0			20992018	#N/A	0			20992018	#N/A	0			20992018	#N/A	0			20992018	#N/A	0			20992018
2099	2019	20992019	浙江省	浙江	浙江2019	4.81218	0.0120027	毛美英	20992019毛美英	独立董事	1		苏为科	20992019苏为科	独立董事	1	1	孙杨	20992019孙杨	董事长	0			20992019	#N/A	0			20992019	#N/A	0			20992019	#N/A	0			20992019	#N/A	0			20992019	#N/A	0			20992019
2100	2015	21002015	浙江省	浙江	浙江2015	0.693147	0.022429	孙卫红	21002015孙卫红	#N/A	0		余雄	21002015余雄	独立董事	1	0	任忠光	21002015任忠光	非独立董事	0		易永健	21002015易永健	#N/A	0			21002015	#N/A	0			21002015	#N/A	0			21002015	#N/A	0			21002015	#N/A	0			21002015
2101	2016	21012016	浙江省	浙江	浙江2016	1.09861	0.026311	孔小文	21012016孔小文	独立董事	1		肖胜方	21012016肖胜方	独立董事	1	0	汪涛	21012016汪涛	董事	0		梁宇清	21012016梁宇清	董事	0			21012016	#N/A	0			21012016	#N/A	0			21012016	#N/A	0			21012016	#N/A	0			21012016
2103	2015	21032015	浙江省	浙江	浙江2015	0.693147	0.022429	邓建新	21032015邓建新	独立董事	1		施光耀	21032015施光耀	独立董事	1	0	胡志明	21032015胡志明	董事	0			21032015	#N/A	0			21032015	#N/A	0			21032015	#N/A	0			21032015	#N/A	0			21032015	#N/A	0			21032015
2109	2017	21092017	广东省	广东	广东2017	2.70805	0.0163228	徐秉惠	21092017徐秉惠	独立董事	1		淡勇	21092017淡勇	独立董事	1	0	杨为乔	21092017杨为乔	独立董事	1	0	陈团柱	21092017陈团柱	董事长	0		王颖	21092017王颖	董事,总经理,董事长	0			21092017	#N/A	0			21092017	#N/A	0			21092017	#N/A	0			21092017
2109	2018	21092018	广东省	广东	广东2018	2.56495	0.0175543	徐秉惠	21092018徐秉惠	独立董事	1		淡勇	21092018淡勇	独立董事	1	0	杨为乔	21092018杨为乔	独立董事	1	0	陈团柱	21092018陈团柱	董事长	0		王颖	21092018王颖	董事,总经理	0			21092018	#N/A	0			21092018	#N/A	0			21092018	#N/A	0			21092018
2113	2018	21132018	湖南省	湖南	湖南2018	4.67283	0.0150218	廖焕国	21132018廖焕国	独立董事	1		李晓明	21132018李晓明	独立董事	1	0	赖钦祥	21132018赖钦祥	董事	0			21132018	#N/A	0			21132018	#N/A	0			21132018	#N/A	0			21132018	#N/A	0			21132018	#N/A	0			21132018
2116	2010	21162010	湖南省	湖南	湖南2010	#N/A	0.0174859	刘晓红	21162010刘晓红	独立董事	1		张静之	21162010张静之	#N/A	0		管一民	21162010管一民	独立董事	1	0		21162010	#N/A	0			21162010	#N/A	0			21162010	#N/A	0			21162010	#N/A	0			21162010	#N/A	0			21162010
2116	2011	21162011	湖南省	湖南	湖南2011	0.693147	0.0209581	禹春武	21162011禹春武	副董事长	0		李志强	21162011李志强	独立董事	1	0	管一民	21162011管一民	独立董事	1	0		21162011	#N/A	0			21162011	#N/A	0			21162011	#N/A	0			21162011	#N/A	0			21162011	#N/A	0			21162011
2116	2012	21162012	湖南省	湖南	湖南2012	0.693147	0.018989	禹春武	21162012禹春武	董事长	0		李志强	21162012李志强	独立董事	1	0	管一民	21162012管一民	独立董事	1	0		21162012	#N/A	0			21162012	#N/A	0			21162012	#N/A	0			21162012	#N/A	0			21162012	#N/A	0			21162012
2116	2015	21162015	湖南省	湖南	湖南2015	1.09861	0.0212538	李文祥	21162015李文祥	独立董事	1		李芸	21162015李芸	董事	0		李志强	21162015李志强	独立董事	1	0		21162015	#N/A	0			21162015	#N/A	0			21162015	#N/A	0			21162015	#N/A	0			21162015	#N/A	0			21162015
2116	2019	21162019	湖南省	湖南	湖南2019	5.95584	0.0183731	丁慧平	21162019丁慧平	独立董事	1		杨晓洁	21162019杨晓洁	董事	0		赵艳春	21162019赵艳春	独立董事	1	0		21162019	#N/A	0			21162019	#N/A	0			21162019	#N/A	0			21162019	#N/A	0			21162019	#N/A	0			21162019
2117	2011	21172011	湖南省	湖南	湖南2011	0.693147	0.0209581	汤云为	21172011汤云为	独立董事	1		刘素英	21172011刘素英	独立董事	1	0	赵福蕊	21172011赵福蕊	董事	0			21172011	#N/A	0			21172011	#N/A	0			21172011	#N/A	0			21172011	#N/A	0			21172011	#N/A	0			21172011
2117	2017	21172017	湖南省	湖南	湖南2017	3.71357	0.0163375	许斌	21172017许斌	独立董事	1		郝纪勇	21172017郝纪勇	独立董事	1	0	夏文庆	21172017夏文庆	董事	0			21172017	#N/A	0			21172017	#N/A	0			21172017	#N/A	0			21172017	#N/A	0			21172017	#N/A	0			21172017
2117	2018	21172018	湖南省	湖南	湖南2018	4.67283	0.0150218	许斌	21172018许斌	独立董事	1		郝纪勇	21172018郝纪勇	独立董事	1	0	夏文庆	21172018夏文庆	董事	0			21172018	#N/A	0			21172018	#N/A	0			21172018	#N/A	0			21172018	#N/A	0			21172018	#N/A	0			21172018
2117	2019	21172019	湖南省	湖南	湖南2019	5.95584	0.0183731	许斌	21172019许斌	独立董事	1		郝纪勇	21172019郝纪勇	独立董事	1	0	夏文庆	21172019夏文庆	董事	0			21172019	#N/A	0			21172019	#N/A	0			21172019	#N/A	0			21172019	#N/A	0			21172019	#N/A	0			21172019
2117	2020	21172020	湖南省	湖南	湖南2020	6.28227	0.0176416	许斌	21172020许斌	独立董事	1		郝纪勇	21172020郝纪勇	独立董事	1	0	夏文庆	21172020夏文庆	董事	0			21172020	#N/A	0			21172020	#N/A	0			21172020	#N/A	0			21172020	#N/A	0			21172020	#N/A	0			21172020
2118	2021	21182021	湖南省	湖南	湖南2021	9.30874	0.0185923	封有顺	21182021封有顺	董事长,总经理,董事会秘书(代理)	0		任跃英	21182021任跃英	独立董事	1	0	程岩	21182021程岩	独立董事	1	0	闫忠海	21182021闫忠海	独立董事	1	0		21182021	#N/A	0			21182021	#N/A	0			21182021	#N/A	0			21182021	#N/A	0			21182021
2119	2013	21192013	湖南省	湖南	湖南2013	1.09861	0.0222391	沈成德	21192013沈成德	独立董事	1		贺正生	21192013贺正生	独立董事	1	0	郑芳	21192013郑芳	副董事长	0			21192013	#N/A	0			21192013	#N/A	0			21192013	#N/A	0			21192013	#N/A	0			21192013	#N/A	0			21192013
2119	2014	21192014	湖南省	湖南	湖南2014	0.693147	0.020457	沈成德	21192014沈成德	独立董事	1		贺正生	21192014贺正生	独立董事	1	0	郑芳	21192014郑芳	副董事长	0			21192014	#N/A	0			21192014	#N/A	0			21192014	#N/A	0			21192014	#N/A	0			21192014	#N/A	0			21192014
2119	2017	21192017	湖南省	湖南	湖南2017	3.71357	0.0163375	彭诚信	21192017彭诚信	独立董事	1		严鹏	21192017严鹏	非独立董事	0		沈一开	21192017沈一开	独立董事	1	0		21192017	#N/A	0			21192017	#N/A	0			21192017	#N/A	0			21192017	#N/A	0			21192017	#N/A	0			21192017
2119	2020	21192020	湖南省	湖南	湖南2020	6.28227	0.0176416	袁桐	21192020袁桐	独立董事	1		张明海	21192020张明海	董事	0		沈成德	21192020沈成德	独立董事	1	0		21192020	#N/A	0			21192020	#N/A	0			21192020	#N/A	0			21192020	#N/A	0			21192020	#N/A	0			21192020
2120	2017	21202017	浙江省	浙江	浙江2017	1.09861	0.0181469	陈立英	21202017陈立英	副董事长,副总裁(副总经理),董事	0		郭美珍	21202017郭美珍	独立董事	1	0	楼光华	21202017楼光华	独立董事	1	0		21202017	#N/A	0			21202017	#N/A	0			21202017	#N/A	0			21202017	#N/A	0			21202017	#N/A	0			21202017
2120	2018	21202018	浙江省	浙江	浙江2018	1.79176	0.0193728	陈立英	21202018陈立英	副董事长,副总裁(副总经理),董事	0		郭美珍	21202018郭美珍	独立董事	1	0	楼光华	21202018楼光华	独立董事	1	0		21202018	#N/A	0			21202018	#N/A	0			21202018	#N/A	0			21202018	#N/A	0			21202018	#N/A	0			21202018
2120	2019	21202019	浙江省	浙江	浙江2019	4.81218	0.0120027	陈立英	21202019陈立英	副董事长,副总裁(副总经理),董事	0		郭美珍	21202019郭美珍	独立董事	1	0	楼光华	21202019楼光华	独立董事	1	0		21202019	#N/A	0			21202019	#N/A	0			21202019	#N/A	0			21202019	#N/A	0			21202019	#N/A	0			21202019
2120	2020	21202020	浙江省	浙江	浙江2020	4.26268	0.0131053	陈立英	21202020陈立英	联席董事长,副总裁,董事	0		张大瑞	21202020张大瑞	独立董事	1	0	楼光华	21202020楼光华	独立董事	1	0		21202020	#N/A	0			21202020	#N/A	0			21202020	#N/A	0			21202020	#N/A	0			21202020	#N/A	0			21202020
2123	2018	21232018	辽宁省	辽宁	辽宁2018	1.60944	0.0153085	吴中华	21232018吴中华	独立董事	1		杨春波	21232018杨春波	董事	0		王一鸣	21232018王一鸣	独立董事	1	0		21232018	#N/A	0			21232018	#N/A	0			21232018	#N/A	0			21232018	#N/A	0			21232018	#N/A	0			21232018
2123	2022	21232022	辽宁省	辽宁	辽宁2022	8.10319	0.0205918	王永	21232022王永	独立董事	1		吴中华	21232022吴中华	独立董事	1	0	田飞冲	21232022田飞冲	董事,副总经理	0			21232022	#N/A	0			21232022	#N/A	0			21232022	#N/A	0			21232022	#N/A	0			21232022	#N/A	0			21232022
2123	2023	21232023	辽宁省	辽宁	辽宁2023	7.84854	#N/A	王永	21232023王永	独立董事	1		吴中华	21232023吴中华	独立董事	1	0	田飞冲	21232023田飞冲	董事,副总经理	0			21232023	#N/A	0			21232023	#N/A	0			21232023	#N/A	0			21232023	#N/A	0			21232023	#N/A	0			21232023
2126	2014	21262014	浙江省	浙江	浙江2014	#N/A	0.0278689	邵少敏	21262014邵少敏	独立董事	1		刘信光	21262014刘信光	独立董事	1	0	季善魁	21262014季善魁	董事	0			21262014	#N/A	0			21262014	#N/A	0			21262014	#N/A	0			21262014	#N/A	0			21262014	#N/A	0			21262014
2126	2017	21262017	浙江省	浙江	浙江2017	1.09861	0.0181469	刘海生	21262017刘海生	独立董事	1		朱晓红	21262017朱晓红	董事,财务总监	0		彭颖红	21262017彭颖红	独立董事	1	0		21262017	#N/A	0			21262017	#N/A	0			21262017	#N/A	0			21262017	#N/A	0			21262017	#N/A	0			21262017
2126	2020	21262020	浙江省	浙江	浙江2020	4.26268	0.0131053	陈不非	21262020陈不非	副董事长	0		刘海生	21262020刘海生	独立董事	1	0	彭颖红	21262020彭颖红	独立董事	1	0		21262020	#N/A	0			21262020	#N/A	0			21262020	#N/A	0			21262020	#N/A	0			21262020	#N/A	0			21262020
2127	2018	21272018	江苏省	江苏	江苏2018	2.56495	0.0202007	吴小亚	21272018吴小亚	独立董事	1		王海峰	21272018王海峰	独立董事	1	0	沈晨熹	21272018沈晨熹	董事,副总经理	0			21272018	#N/A	0			21272018	#N/A	0			21272018	#N/A	0			21272018	#N/A	0			21272018	#N/A	0			21272018
2127	2019	21272019	江苏省	江苏	江苏2019	3.2581	0.0197087	吴小亚	21272019吴小亚	独立董事	1		王海峰	21272019王海峰	独立董事	1	0	沈晨熹	21272019沈晨熹	董事,副总经理	0			21272019	#N/A	0			21272019	#N/A	0			21272019	#N/A	0			21272019	#N/A	0			21272019	#N/A	0			21272019
2129	2015	21292015	天津市	天津	天津2015	2.89037	0.0263344	张俊民	21292015张俊民	独立董事	1		陆剑秋	21292015陆剑秋	独立董事	1	0	刘宁	21292015刘宁	独立董事	1	0		21292015	#N/A	0			21292015	#N/A	0			21292015	#N/A	0			21292015	#N/A	0			21292015	#N/A	0			21292015
2129	2017	21292017	天津市	天津	天津2017	3.3322	0.0210169	张俊民	21292017张俊民	独立董事	1		陆剑秋	21292017陆剑秋	独立董事	1	0	刘宁	21292017刘宁	#N/A	0			21292017	#N/A	0			21292017	#N/A	0			21292017	#N/A	0			21292017	#N/A	0			21292017	#N/A	0			21292017
2129	2019	21292019	天津市	天津	天津2019	4.46591	0.0253144	张波	21292019张波	独立董事	1		周红	21292019周红	独立董事	1	0	毕晓方	21292019毕晓方	独立董事	1	0		21292019	#N/A	0			21292019	#N/A	0			21292019	#N/A	0			21292019	#N/A	0			21292019	#N/A	0			21292019
2129	2022	21292022	天津市	天津	天津2022	7.14045	0.0240684	周红	21292022周红	独立董事	1		毕晓方	21292022毕晓方	独立董事	1	0	张长旭	21292022张长旭	董事,副总经理,财务总监	0			21292022	#N/A	0			21292022	#N/A	0			21292022	#N/A	0			21292022	#N/A	0			21292022	#N/A	0			21292022
2130	2012	21302012	广东省	广东	广东2012	0.693147	0.0230561	许岳明	21302012许岳明	董事	0		曾凡跃	21302012曾凡跃	独立董事	1	0	桂全宏	21302012桂全宏	独立董事	1	1		21302012	#N/A	0			21302012	#N/A	0			21302012	#N/A	0			21302012	#N/A	0			21302012	#N/A	0			21302012
2131	2012	21312012	广东省	广东	广东2012	0.693147	0.0230561	赵保卿	21312012赵保卿	独立董事	1		王壮利	21312012王壮利	副董事长	0		靳明	21312012靳明	独立董事	1	0		21312012	#N/A	0			21312012	#N/A	0			21312012	#N/A	0			21312012	#N/A	0			21312012	#N/A	0			21312012
2131	2014	21312014	浙江省	浙江	浙江2014	#N/A	0.0278689	赵保卿	21312014赵保卿	独立董事	1		王壮利	21312014王壮利	副董事长	0		靳明	21312014靳明	独立董事	1	0		21312014	#N/A	0			21312014	#N/A	0			21312014	#N/A	0			21312014	#N/A	0			21312014	#N/A	0			21312014
2131	2015	21312015	浙江省	浙江	浙江2015	0.693147	0.022429	赵保卿	21312015赵保卿	独立董事	1		王壮利	21312015王壮利	副董事长	0		张翔	21312015张翔	独立董事	1	0		21312015	#N/A	0			21312015	#N/A	0			21312015	#N/A	0			21312015	#N/A	0			21312015	#N/A	0			21312015
2131	2019	21312019	浙江省	浙江	浙江2019	4.81218	0.0120027	彭涛	21312019彭涛	独立董事	1	1	王壮利	21312019王壮利	副董事长	0		王呈斌	21312019王呈斌	独立董事	1	0		21312019	#N/A	0			21312019	#N/A	0			21312019	#N/A	0			21312019	#N/A	0			21312019	#N/A	0			21312019
2132	2010	21322010	浙江省	浙江	浙江2010	#N/A	0.0187642	王莉婷	21322010王莉婷	独立董事	1		郑锦桥	21322010郑锦桥	独立董事	1	0	魏现州	21322010魏现州	独立董事	1	0	徐会景	21322010徐会景	董事	0		陈丙章	21322010陈丙章	董事	0			21322010	#N/A	0			21322010	#N/A	0			21322010	#N/A	0			21322010
2132	2011	21322011	浙江省	浙江	浙江2011	#N/A	0.0219653	王莉婷	21322011王莉婷	独立董事	1		郑锦桥	21322011郑锦桥	独立董事	1	0	魏现州	21322011魏现州	独立董事	1	0	徐会景	21322011徐会景	董事	0		陈丙章	21322011陈丙章	董事	0			21322011	#N/A	0			21322011	#N/A	0			21322011	#N/A	0			21322011
2133	2022	21332022	浙江省	浙江	浙江2022	9.81263	0.013772	张淼洪	21332022张淼洪	独立董事	1		贾生华	21332022贾生华	独立董事	1	0	胡巍华	21332022胡巍华	董事	0			21332022	#N/A	0			21332022	#N/A	0			21332022	#N/A	0			21332022	#N/A	0			21332022	#N/A	0			21332022
2133	2023	21332023	浙江省	浙江	浙江2023	9.74326	#N/A	姚铮	21332023姚铮	独立董事	1		胡巍华	21332023胡巍华	董事,常务副总裁	0		贾生华	21332023贾生华	独立董事	1	0		21332023	#N/A	0			21332023	#N/A	0			21332023	#N/A	0			21332023	#N/A	0			21332023	#N/A	0			21332023
2134	2020	21342020	浙江省	浙江	浙江2020	4.26268	0.0131053	陆宇建	21342020陆宇建	独立董事	1		刘士财	21342020刘士财	董事	0		何青	21342020何青	独立董事	1	0		21342020	#N/A	0			21342020	#N/A	0			21342020	#N/A	0			21342020	#N/A	0			21342020	#N/A	0			21342020
2134	2022	21342022	浙江省	浙江	浙江2022	9.81263	0.013772	邵光洁	21342022邵光洁	董事,总经理	0		何青	21342022何青	独立董事	1	0	杨丽芳	21342022杨丽芳	独立董事	1	0		21342022	#N/A	0			21342022	#N/A	0			21342022	#N/A	0			21342022	#N/A	0			21342022	#N/A	0			21342022
2134	2023	21342023	浙江省	浙江	浙江2023	9.74326	#N/A	邵光洁	21342023邵光洁	董事	0		陈长生	21342023陈长生	独立董事	1	0	杨丽芳	21342023杨丽芳	独立董事	1	0		21342023	#N/A	0			21342023	#N/A	0			21342023	#N/A	0			21342023	#N/A	0			21342023	#N/A	0			21342023
2138	2010	21382010	浙江省	浙江	浙江2010	#N/A	0.0187642	蔡敬侠	21382010蔡敬侠	独立董事	1		黄平	21382010黄平	独立董事	1	0	张鹏	21382010张鹏	独立董事	1	0	倪秉达	21382010倪秉达	董事	0		李有云	21382010李有云	董事,常务副总裁	0			21382010	#N/A	0			21382010	#N/A	0			21382010	#N/A	0			21382010
2138	2013	21382013	浙江省	浙江	浙江2013	#N/A	0.0203306	蔡敬侠	21382013蔡敬侠	独立董事	1		张鹏	21382013张鹏	独立董事	1	0	李有云	21382013李有云	董事,常务副总裁	0			21382013	#N/A	0			21382013	#N/A	0			21382013	#N/A	0			21382013	#N/A	0			21382013	#N/A	0			21382013
2138	2014	21382014	浙江省	浙江	浙江2014	#N/A	0.0278689	蔡敬侠	21382014蔡敬侠	独立董事	1		张鹏	21382014张鹏	独立董事	1	0	李有云	21382014李有云	董事,常务副总裁	0			21382014	#N/A	0			21382014	#N/A	0			21382014	#N/A	0			21382014	#N/A	0			21382014	#N/A	0			21382014
2138	2015	21382015	浙江省	浙江	浙江2015	0.693147	0.022429	吴育辉	21382015吴育辉	独立董事	1		邱大梁	21382015邱大梁	独立董事	1	0	李有云	21382015李有云	董事,常务副总裁	0			21382015	#N/A	0			21382015	#N/A	0			21382015	#N/A	0			21382015	#N/A	0			21382015	#N/A	0			21382015
2138	2023	21382023	广东省	广东	广东2023	9.88283	#N/A	王天广	21382023王天广	独立董事	1		李有云	21382023李有云	董事,常务副总裁	0		路晓燕	21382023路晓燕	独立董事	1	0		21382023	#N/A	0			21382023	#N/A	0			21382023	#N/A	0			21382023	#N/A	0			21382023	#N/A	0			21382023
2139	2017	21392017	广东省	广东	广东2017	2.70805	0.0163228	谢家伟	21392017谢家伟	独立董事	1		姚小聪	21392017姚小聪	独立董事	1	0	郝世明	21392017郝世明	独立董事	1	0		21392017	#N/A	0			21392017	#N/A	0			21392017	#N/A	0			21392017	#N/A	0			21392017	#N/A	0			21392017
2139	2019	21392019	广东省	广东	广东2019	2.77259	0.0140111	郝世明	21392019郝世明	独立董事	1		华秀萍	21392019华秀萍	独立董事	1	0	施云	21392019施云	独立董事	1	0		21392019	#N/A	0			21392019	#N/A	0			21392019	#N/A	0			21392019	#N/A	0			21392019	#N/A	0			21392019
2143	2014	21432014	浙江省	浙江	浙江2014	#N/A	0.0278689	李定清	21432014李定清	独立董事	1		金翔宇	21432014金翔宇	董事长,总经理	0		程源伟	21432014程源伟	独立董事	1	0		21432014	#N/A	0			21432014	#N/A	0			21432014	#N/A	0			21432014	#N/A	0			21432014	#N/A	0			21432014
2143	2016	21432016	浙江省	浙江	浙江2016	1.09861	0.026311	辛茂荀	21432016辛茂荀	独立董事	1		范红	21432016范红	独立董事	1	1	李荣强	21432016李荣强	董事,董事会秘书	0			21432016	#N/A	0			21432016	#N/A	0			21432016	#N/A	0			21432016	#N/A	0			21432016	#N/A	0			21432016
2143	2017	21432017	浙江省	浙江	浙江2017	1.09861	0.0181469	张然	21432017张然	独立董事	1		范红	21432017范红	独立董事	1	1	李荣强	21432017李荣强	董事,董事会秘书	0			21432017	#N/A	0			21432017	#N/A	0			21432017	#N/A	0			21432017	#N/A	0			21432017	#N/A	0			21432017
2148	2016	21482016	河北省	河北	河北2016	#N/A	0.0292976	胡建军	21482016胡建军	独立董事	1		许建国	21482016许建国	副董事长	0		刘剑锋	21482016刘剑锋	独立董事	1	0		21482016	#N/A	0			21482016	#N/A	0			21482016	#N/A	0			21482016	#N/A	0			21482016	#N/A	0			21482016
2148	2018	21482018	河北省	河北	河北2018	3.29584	0.0267334	刘剑锋	21482018刘剑锋	独立董事	1	1	彭伟	21482018彭伟	董事	0		晏小平	21482018晏小平	独立董事	1	0		21482018	#N/A	0			21482018	#N/A	0			21482018	#N/A	0			21482018	#N/A	0			21482018	#N/A	0			21482018
2149	2017	21492017	河北省	河北	河北2017	2.3979	0.0248665	王伟雄	21492017王伟雄	独立董事	1		程志堂	21492017程志堂	副董事长	0		何雁明	21492017何雁明	独立董事	1	0		21492017	#N/A	0			21492017	#N/A	0			21492017	#N/A	0			21492017	#N/A	0			21492017	#N/A	0			21492017
2149	2020	21492020	河北省	河北	河北2020	4.85203	0.0220907	王伟雄	21492020王伟雄	独立董事	1		程志堂	21492020程志堂	副董事长	0		杨丽荣	21492020杨丽荣	独立董事	1	0		21492020	#N/A	0			21492020	#N/A	0			21492020	#N/A	0			21492020	#N/A	0			21492020	#N/A	0			21492020
2150	2013	21502013	河北省	河北	河北2013	#N/A	0.0188337	徐凤英	21502013徐凤英	独立董事	1		杨海坤	21502013杨海坤	独立董事	1	0	贝政新	21502013贝政新	独立董事	1	0	柳振江	21502013柳振江	董事长,总经理	0		顾雄斌	21502013顾雄斌	董事	0			21502013	#N/A	0			21502013	#N/A	0			21502013	#N/A	0			21502013
2150	2018	21502018	河北省	河北	河北2018	3.29584	0.0267334	俞雪华	21502018俞雪华	独立董事	1		龚菊明	21502018龚菊明	独立董事	1	0	高金祥	21502018高金祥	独立董事	1	0	柳振江	21502018柳振江	董事长,总经理	0		朱庆	21502018朱庆	董事	0			21502018	#N/A	0			21502018	#N/A	0			21502018	#N/A	0			21502018
2151	2016	21512016	河北省	河北	河北2016	#N/A	0.0292976	卫捷	21512016卫捷	独立董事	1		钟峻	21512016钟峻	独立董事	1	0	胡刚	21512016胡刚	董事,总经理	0			21512016	#N/A	0			21512016	#N/A	0			21512016	#N/A	0			21512016	#N/A	0			21512016	#N/A	0			21512016
2151	2017	21512017	河北省	河北	河北2017	2.3979	0.0248665	卫捷	21512017卫捷	独立董事	1		钟峻	21512017钟峻	独立董事	1	0	胡刚	21512017胡刚	董事,总经理	0			21512017	#N/A	0			21512017	#N/A	0			21512017	#N/A	0			21512017	#N/A	0			21512017	#N/A	0			21512017
2151	2023	21512023	北京市	北京	北京2023	7.79934	#N/A	刘国华	21512023刘国华	独立董事	1		周光宇	21512023周光宇	非独立董事,副总经理	0		刘胜民	21512023刘胜民	独立董事	1	0		21512023	#N/A	0			21512023	#N/A	0			21512023	#N/A	0			21512023	#N/A	0			21512023	#N/A	0			21512023
2153	2013	21532013	北京市	北京	北京2013	#N/A	0.0228363	阎丽明	21532013阎丽明	独立董事	1		刘剑锋	21532013刘剑锋	独立董事	1	0	赖德源	21532013赖德源	董事,副总裁,财务总监	0			21532013	#N/A	0			21532013	#N/A	0			21532013	#N/A	0			21532013	#N/A	0			21532013	#N/A	0			21532013
2154	2023	21542023	浙江省	浙江	浙江2023	9.74326	#N/A	李浩然	21542023李浩然	独立董事	1		沃健	21542023沃健	独立董事	1	0	吴志泽	21542023吴志泽	董事长,总经理	0			21542023	#N/A	0			21542023	#N/A	0			21542023	#N/A	0			21542023	#N/A	0			21542023	#N/A	0			21542023
2158	2017	21582017	江西省	江西	江西2017	0.693147	0.0235461	钱逢胜	21582017钱逢胜	独立董事	1		韩凤菊	21582017韩凤菊	独立董事	1	0	陈嘉兴	21582017陈嘉兴	董事	0			21582017	#N/A	0			21582017	#N/A	0			21582017	#N/A	0			21582017	#N/A	0			21582017	#N/A	0			21582017
2158	2018	21582018	江西省	江西	江西2018	1.09861	0.0245048	钱逢胜	21582018钱逢胜	独立董事	1		韩凤菊	21582018韩凤菊	独立董事	1	0	陈嘉兴	21582018陈嘉兴	董事	0			21582018	#N/A	0			21582018	#N/A	0			21582018	#N/A	0			21582018	#N/A	0			21582018	#N/A	0			21582018
2160	2022	21602022	江西省	江西	江西2022	8.85181	0.0175004	王则斌	21602022王则斌	独立董事	1		靳祥绪	21602022靳祥绪	非独立董事	0		孙闯	21602022孙闯	独立董事	1	0		21602022	#N/A	0			21602022	#N/A	0			21602022	#N/A	0			21602022	#N/A	0			21602022	#N/A	0			21602022
2161	2017	21612017	江西省	江西	江西2017	0.693147	0.0235461	孙枫	21612017孙枫	独立董事	1		张大志	21612017张大志	独立董事	1	0	马琳	21612017马琳	非独立董事,副总裁,董事会秘书	0			21612017	#N/A	0			21612017	#N/A	0			21612017	#N/A	0			21612017	#N/A	0			21612017	#N/A	0			21612017
2161	2022	21612022	江西省	江西	江西2022	8.85181	0.0175004	徐先达	21612022徐先达	独立董事	1		蔡敬侠	21612022蔡敬侠	独立董事	1	0	马琳	21612022马琳	非独立董事,董事会秘书	0			21612022	#N/A	0			21612022	#N/A	0			21612022	#N/A	0			21612022	#N/A	0			21612022	#N/A	0			21612022
2163	2010	21632010	上海市	上海	上海2010	#N/A	0.014157	王琦	21632010王琦	独立董事	1		周成新	21632010周成新	独立董事	1	0	谢嘉宁	21632010谢嘉宁	董事	0			21632010	#N/A	0			21632010	#N/A	0			21632010	#N/A	0			21632010	#N/A	0			21632010	#N/A	0			21632010
2163	2015	21632015	上海市	上海	上海2015	1.79176	0.0159259	章顺文	21632015章顺文	独立董事	1		王成义	21632015王成义	独立董事	1	0	陶国飞	21632015陶国飞	董事	0			21632015	#N/A	0			21632015	#N/A	0			21632015	#N/A	0			21632015	#N/A	0			21632015	#N/A	0			21632015
2164	2015	21642015	上海市	上海	上海2015	1.79176	0.0159259	刘舟宏	21642015刘舟宏	独立董事	1		陈农	21642015陈农	独立董事	1	0	许丽萍	21642015许丽萍	董事	0			21642015	#N/A	0			21642015	#N/A	0			21642015	#N/A	0			21642015	#N/A	0			21642015	#N/A	0			21642015
2164	2016	21642016	上海市	上海	上海2016	2.70805	0.0157322	刘舟宏	21642016刘舟宏	独立董事	1		陈农	21642016陈农	独立董事	1	0	许丽萍	21642016许丽萍	董事	0			21642016	#N/A	0			21642016	#N/A	0			21642016	#N/A	0			21642016	#N/A	0			21642016	#N/A	0			21642016
2164	2017	21642017	上海市	上海	上海2017	2.56495	0.0153257	刘舟宏	21642017刘舟宏	独立董事	1		陈农	21642017陈农	独立董事	1	0	许丽萍	21642017许丽萍	董事	0			21642017	#N/A	0			21642017	#N/A	0			21642017	#N/A	0			21642017	#N/A	0			21642017	#N/A	0			21642017
2168	2017	21682017	广东省	广东	广东2017	2.70805	0.0163228	叶陈刚	21682017叶陈刚	独立董事	1		钟晓林	21682017钟晓林	独立董事	1	0	沈晓超	21682017沈晓超	董事	0			21682017	#N/A	0			21682017	#N/A	0			21682017	#N/A	0			21682017	#N/A	0			21682017	#N/A	0			21682017
2169	2017	21692017	广东省	广东	广东2017	2.70805	0.0163228	阮永平	21692017阮永平	独立董事	1		李业	21692017李业	独立董事	1	0	郑晓军	21692017郑晓军	董事	0			21692017	#N/A	0			21692017	#N/A	0			21692017	#N/A	0			21692017	#N/A	0			21692017	#N/A	0			21692017
2170	2018	21702018	广东省	广东	广东2018	2.56495	0.0175543	何晴	21702018何晴	独立董事	1	1	徐育康	21702018徐育康	董事	0		王晓玲	21702018王晓玲	独立董事	1	1		21702018	#N/A	0			21702018	#N/A	0			21702018	#N/A	0			21702018	#N/A	0			21702018	#N/A	0			21702018
2170	2019	21702019	广东省	广东	广东2019	2.77259	0.0140111	何晴	21702019何晴	独立董事	1		徐育康	21702019徐育康	董事	0		王晓玲	21702019王晓玲	独立董事	1	1		21702019	#N/A	0			21702019	#N/A	0			21702019	#N/A	0			21702019	#N/A	0			21702019	#N/A	0			21702019
2172	2015	21722015	广东省	广东	广东2015	0.693147	0.0185536	肖维红	21722015肖维红	独立董事	1		徐利英	21722015徐利英	监事	0		王志刚	21722015王志刚	独立董事	1	0		21722015	#N/A	0			21722015	#N/A	0			21722015	#N/A	0			21722015	#N/A	0			21722015	#N/A	0			21722015
2172	2016	21722016	广东省	广东	广东2016	1.94591	0.0237664	巢序	21722016巢序	独立董事	1		李科峰	21722016李科峰	董事	0		陈险峰	21722016陈险峰	独立董事	1	0		21722016	#N/A	0			21722016	#N/A	0			21722016	#N/A	0			21722016	#N/A	0			21722016	#N/A	0			21722016
2172	2017	21722017	广东省	广东	广东2017	2.70805	0.0163228	巢序	21722017巢序	独立董事	1		李科峰	21722017李科峰	董事	0		陈险峰	21722017陈险峰	独立董事	1	0		21722017	#N/A	0			21722017	#N/A	0			21722017	#N/A	0			21722017	#N/A	0			21722017	#N/A	0			21722017
2172	2022	21722022	广东省	广东	广东2022	9.96857	0.0155058	周群信	21722022周群信	独立董事	1		陈和平	21722022陈和平	独立董事	1	0	李科峰	21722022李科峰	董事	0			21722022	#N/A	0			21722022	#N/A	0			21722022	#N/A	0			21722022	#N/A	0			21722022	#N/A	0			21722022
2172	2023	21722023	广东省	广东	广东2023	9.88283	#N/A	周群信	21722023周群信	独立董事	1		陈和平	21722023陈和平	独立董事	1	0	李科峰	21722023李科峰	董事	0			21722023	#N/A	0			21722023	#N/A	0			21722023	#N/A	0			21722023	#N/A	0			21722023	#N/A	0			21722023
2173	2012	21732012	广东省	广东	广东2012	0.693147	0.0230561	徐志康	21732012徐志康	独立董事	1		阮光寅	21732012阮光寅	董事,副总裁	0		章程	21732012章程	独立董事	1	0		21732012	#N/A	0			21732012	#N/A	0			21732012	#N/A	0			21732012	#N/A	0			21732012	#N/A	0			21732012
2174	2013	21742013	福建省	福建	福建2013	#N/A	0.0214459	屈文洲	21742013屈文洲	#N/A	0		颜金练	21742013颜金练	副董事长,副总经理	0		周业安	21742013周业安	#N/A	0			21742013	#N/A	0			21742013	#N/A	0			21742013	#N/A	0			21742013	#N/A	0			21742013	#N/A	0			21742013
2174	2015	21742015	福建省	福建	福建2015	1.38629	0.0206139	吴育辉	21742015吴育辉	独立董事	1		陈礼标	21742015陈礼标	副总经理,董事	0		杨鹏慧	21742015杨鹏慧	独立董事	1	0		21742015	#N/A	0			21742015	#N/A	0			21742015	#N/A	0			21742015	#N/A	0			21742015	#N/A	0			21742015
2174	2018	21742018	福建省	福建	福建2018	2.3979	0.0239449	陈冬华	21742018陈冬华	独立董事	1		陈礼标	21742018陈礼标	副总经理,董事	0		冯仑	21742018冯仑	独立董事	1	0		21742018	#N/A	0			21742018	#N/A	0			21742018	#N/A	0			21742018	#N/A	0			21742018	#N/A	0			21742018
2175	2016	21752016	广西壮族自治区	广西	广西2016	1.60944	0.0209049	刘红玉	21752016刘红玉	独立董事	1		李文华	21752016李文华	独立董事	1	0	彭敏	21752016彭敏	董事	0		刘菏卿	21752016刘菏卿	董事	0			21752016	#N/A	0			21752016	#N/A	0			21752016	#N/A	0			21752016	#N/A	0			21752016
2175	2019	21752019	广西壮族自治区	广西	广西2019	2.94444	0.0196464	陈守忠	21752019陈守忠	独立董事	1		孙建	21752019孙建	非独立董事	0		寿祺	21752019寿祺	独立董事	1	0		21752019	#N/A	0			21752019	#N/A	0			21752019	#N/A	0			21752019	#N/A	0			21752019	#N/A	0			21752019
2177	2013	21772013	江西省	江西	江西2013	#N/A	0.0284333	石本仁	21772013石本仁	独立董事	1		张华	21772013张华	独立董事	1	0	谭骅	21772013谭骅	董事,副总经理,董事会秘书	0			21772013	#N/A	0			21772013	#N/A	0			21772013	#N/A	0			21772013	#N/A	0			21772013	#N/A	0			21772013
2177	2014	21772014	江西省	江西	江西2014	#N/A	0.0211756	石本仁	21772014石本仁	独立董事	1		张华	21772014张华	独立董事	1	0	谭骅	21772014谭骅	董事,副总经理,董事会秘书	0			21772014	#N/A	0			21772014	#N/A	0			21772014	#N/A	0			21772014	#N/A	0			21772014	#N/A	0			21772014
2177	2022	21772022	江西省	江西	江西2022	8.85181	0.0175004	谭骅	21772022谭骅	董事长,总经理	0		张华	21772022张华	独立董事	1	0	刘国常	21772022刘国常	独立董事	1	0		21772022	#N/A	0			21772022	#N/A	0			21772022	#N/A	0			21772022	#N/A	0			21772022	#N/A	0			21772022
2177	2023	21772023	江西省	江西	江西2023	9.23034	#N/A	谭骅	21772023谭骅	董事,总经理,副总经理,董事会秘书,董事长	0		张华	21772023张华	独立董事	1	0	石水平	21772023石水平	独立董事	1	0		21772023	#N/A	0			21772023	#N/A	0			21772023	#N/A	0			21772023	#N/A	0			21772023	#N/A	0			21772023
2179	2010	21792010	河南省	河南	河南2010	#N/A	0.0125948	干凤琪	21792010干凤琪	独立董事	1		扈玉生	21792010扈玉生	#N/A	0		王玉杰	21792010王玉杰	独立董事	1	0		21792010	#N/A	0			21792010	#N/A	0			21792010	#N/A	0			21792010	#N/A	0			21792010	#N/A	0			21792010
2179	2015	21792015	河南省	河南	河南2015	3.3322	0.016777	王会兰	21792015王会兰	独立董事	1		罗青华	21792015罗青华	独立董事	1	0	石银江	21792015石银江	非独立董事	0			21792015	#N/A	0			21792015	#N/A	0			21792015	#N/A	0			21792015	#N/A	0			21792015	#N/A	0			21792015
2179	2016	21792016	河南省	河南	河南2016	3.29584	0.0152979	王会兰	21792016王会兰	独立董事	1		罗青华	21792016罗青华	独立董事	1	0	石银江	21792016石银江	非独立董事	0			21792016	#N/A	0			21792016	#N/A	0			21792016	#N/A	0			21792016	#N/A	0			21792016	#N/A	0			21792016
2179	2020	21792020	河南省	河南	河南2020	5.15329	0.020523	王会兰	21792020王会兰	独立董事	1		罗青华	21792020罗青华	独立董事	1	0	王波	21792020王波	非独立董事	0			21792020	#N/A	0			21792020	#N/A	0			21792020	#N/A	0			21792020	#N/A	0			21792020	#N/A	0			21792020
2180	2023	21802023	广东省	广东	广东2023	9.88283	#N/A	汪永华	21802023汪永华	非独立董事,常务高级副总经理	0		唐天云	21802023唐天云	独立董事	1	0	肖永平	21802023肖永平	独立董事	1	1		21802023	#N/A	0			21802023	#N/A	0			21802023	#N/A	0			21802023	#N/A	0			21802023	#N/A	0			21802023
2181	2019	21812019	广东省	广东	广东2019	2.77259	0.0140111	李俊	21812019李俊	独立董事	1		朱征夫	21812019朱征夫	独立董事	1	0	陈珠明	21812019陈珠明	独立董事	1	0	凌峰	21812019凌峰	董事	0		邓振球	21812019邓振球	董事	0			21812019	#N/A	0			21812019	#N/A	0			21812019	#N/A	0			21812019
2181	2023	21812023	广东省	广东	广东2023	9.88283	#N/A	陈玉罡	21812023陈玉罡	独立董事	1		范海峰	21812023范海峰	独立董事	1	1	段淳林	21812023段淳林	独立董事	1	0	叶韵	21812023叶韵	非独立董事	0		吴宇	21812023吴宇	董事	0			21812023	#N/A	0			21812023	#N/A	0			21812023	#N/A	0			21812023
2182	2010	21822010	广东省	广东	广东2010	#N/A	0.0216352	冯巧根	21822010冯巧根	独立董事	1		梅小明	21822010梅小明	董事长,总经理	0		詹文雄	21822010詹文雄	董事	0		王开田	21822010王开田	独立董事	1	0	宋颂兴	21822010宋颂兴	独立董事	1	0		21822010	#N/A	0			21822010	#N/A	0			21822010	#N/A	0			21822010
2182	2011	21822011	广东省	广东	广东2011	#N/A	0.0199093	冯巧根	21822011冯巧根	独立董事	1		梅小明	21822011梅小明	董事长,总经理	0		詹文雄	21822011詹文雄	董事	0		王开田	21822011王开田	独立董事	1	0	宋颂兴	21822011宋颂兴	独立董事	1	0		21822011	#N/A	0			21822011	#N/A	0			21822011	#N/A	0			21822011
2182	2012	21822012	广东省	广东	广东2012	0.693147	0.0230561	冯巧根	21822012冯巧根	独立董事	1		梅小明	21822012梅小明	董事长,总经理	0		詹文雄	21822012詹文雄	董事	0		王开田	21822012王开田	独立董事	1	0	宋颂兴	21822012宋颂兴	独立董事	1	0		21822012	#N/A	0			21822012	#N/A	0			21822012	#N/A	0			21822012
2182	2013	21822013	广东省	广东	广东2013	#N/A	0.0237707	冯巧根	21822013冯巧根	独立董事	1		梅小明	21822013梅小明	董事长,总经理	0		吴剑飞	21822013吴剑飞	董事,董事会秘书	0		蒋建华	21822013蒋建华	独立董事	1	0	宋颂兴	21822013宋颂兴	独立董事	1	0		21822013	#N/A	0			21822013	#N/A	0			21822013	#N/A	0			21822013
2182	2015	21822015	广东省	广东	广东2015	0.693147	0.0185536	吴斌	21822015吴斌	独立董事	1		梅小明	21822015梅小明	董事长,总经理	0		吴剑飞	21822015吴剑飞	董事,董事会秘书	0		蒋建华	21822015蒋建华	独立董事	1	0	刘昕	21822015刘昕	独立董事	1	0		21822015	#N/A	0			21822015	#N/A	0			21822015	#N/A	0			21822015
2182	2019	21822019	广东省	广东	广东2019	2.77259	0.0140111	江希和	21822019江希和	独立董事	1		梅小明	21822019梅小明	董事长,总经理	0		陆文龙	21822019陆文龙	独立董事	1	0	刘昕	21822019刘昕	独立董事	1	0		21822019	#N/A	0			21822019	#N/A	0			21822019	#N/A	0			21822019	#N/A	0			21822019
2182	2020	21822020	广东省	广东	广东2020	2.83321	0.0174561	江希和	21822020江希和	独立董事	1		梅小明	21822020梅小明	董事长,总经理	0		陆文龙	21822020陆文龙	独立董事	1	1	刘昕	21822020刘昕	独立董事	1	0		21822020	#N/A	0			21822020	#N/A	0			21822020	#N/A	0			21822020	#N/A	0			21822020
2183	2011	21832011	广东省	广东	广东2011	#N/A	0.0199093	莫少霞	21832011莫少霞	独立董事	1		周成新	21832011周成新	独立董事	1	0	陈伟民	21832011陈伟民	董事	0			21832011	#N/A	0			21832011	#N/A	0			21832011	#N/A	0			21832011	#N/A	0			21832011	#N/A	0			21832011
2183	2012	21832012	广东省	广东	广东2012	0.693147	0.0230561	莫少霞	21832012莫少霞	独立董事	1		周成新	21832012周成新	独立董事	1	0	陈伟民	21832012陈伟民	副董事长,副总经理	0			21832012	#N/A	0			21832012	#N/A	0			21832012	#N/A	0			21832012	#N/A	0			21832012	#N/A	0			21832012
2183	2013	21832013	广东省	广东	广东2013	#N/A	0.0237707	莫少霞	21832013莫少霞	独立董事	1		周成新	21832013周成新	独立董事	1	0	陈伟民	21832013陈伟民	副董事长,副总经理	0			21832013	#N/A	0			21832013	#N/A	0			21832013	#N/A	0			21832013	#N/A	0			21832013	#N/A	0			21832013
2183	2023	21832023	广东省	广东	广东2023	9.88283	#N/A	邓建新	21832023邓建新	独立董事	1		毕晓婷	21832023毕晓婷	独立董事	1	0	周国辉	21832023周国辉	董事长,总经理	0			21832023	#N/A	0			21832023	#N/A	0			21832023	#N/A	0			21832023	#N/A	0			21832023	#N/A	0			21832023
2185	2012	21852012	广东省	广东	广东2012	0.693147	0.0230561	陈斌才	21852012陈斌才	独立董事	1		王芹生	21852012王芹生	独立董事	1	0	肖胜利	21852012肖胜利	董事长	0			21852012	#N/A	0			21852012	#N/A	0			21852012	#N/A	0			21852012	#N/A	0			21852012	#N/A	0			21852012
2186	2015	21862015	甘肃省	甘肃	甘肃2015	0.693147	0.0189359	王秀丽	21862015王秀丽	独立董事	1		周健	21862015周健	董事	0		邓小丰	21862015邓小丰	独立董事	1	0		21862015	#N/A	0			21862015	#N/A	0			21862015	#N/A	0			21862015	#N/A	0			21862015	#N/A	0			21862015
2186	2018	21862018	甘肃省	甘肃	甘肃2018	1.09861	0.0187517	王秀丽	21862018王秀丽	独立董事	1		邓小丰	21862018邓小丰	独立董事	1	0	李源光	21862018李源光	董事	0			21862018	#N/A	0			21862018	#N/A	0			21862018	#N/A	0			21862018	#N/A	0			21862018	#N/A	0			21862018
2188	2015	21882015	甘肃省	甘肃	甘肃2015	0.693147	0.0189359	陈银华	21882015陈银华	独立董事	1		陈信勇	21882015陈信勇	独立董事	1	1	查力强	21882015查力强	#N/A	0			21882015	#N/A	0			21882015	#N/A	0			21882015	#N/A	0			21882015	#N/A	0			21882015	#N/A	0			21882015
2188	2019	21882019	甘肃省	甘肃	甘肃2019	1.09861	0.0191526	陈银华	21882019陈银华	独立董事	1		陈信勇	21882019陈信勇	独立董事	1	0	徐振春	21882019徐振春	董事,副总经理	0			21882019	#N/A	0			21882019	#N/A	0			21882019	#N/A	0			21882019	#N/A	0			21882019	#N/A	0			21882019
2188	2020	21882020	甘肃省	甘肃	甘肃2020	1.60944	0.0197157	陈银华	21882020陈银华	独立董事	1		陈信勇	21882020陈信勇	独立董事	1	0	徐振春	21882020徐振春	董事,副总经理,董事会秘书	0			21882020	#N/A	0			21882020	#N/A	0			21882020	#N/A	0			21882020	#N/A	0			21882020	#N/A	0			21882020
2188	2023	21882023	甘肃省	甘肃	甘肃2023	8.50755	#N/A	傅震刚	21882023傅震刚	独立董事	1		邵毅平	21882023邵毅平	独立董事	1	0	傅东良	21882023傅东良	董事,总经理	0			21882023	#N/A	0			21882023	#N/A	0			21882023	#N/A	0			21882023	#N/A	0			21882023	#N/A	0			21882023
2189	2023	21892023	河南省	河南	河南2023	8.96814	#N/A	刘姝威	21892023刘姝威	独立董事	1		徐斌	21892023徐斌	董事	0		王腾蛟	21892023王腾蛟	独立董事	1	0		21892023	#N/A	0			21892023	#N/A	0			21892023	#N/A	0			21892023	#N/A	0			21892023	#N/A	0			21892023
2190	2012	21902012	河南省	河南	河南2012	0.693147	0.0120192	彭启发	21902012彭启发	独立董事	1		刘锡良	21902012刘锡良	独立董事	1	0	刘宗权	21902012刘宗权	董事	0			21902012	#N/A	0			21902012	#N/A	0			21902012	#N/A	0			21902012	#N/A	0			21902012	#N/A	0			21902012
2192	2017	21922017	广东省	广东	广东2017	2.70805	0.0163228	白华	21922017白华	独立董事	1		向旭家	21922017向旭家	独立董事	1	0	张加祥	21922017张加祥	董事	0			21922017	#N/A	0			21922017	#N/A	0			21922017	#N/A	0			21922017	#N/A	0			21922017	#N/A	0			21922017
2193	2017	21932017	广东省	广东	广东2017	2.70805	0.0163228	叶敏	21932017叶敏	独立董事	1		邱亚夫	21932017邱亚夫	董事长	0		李井新	21932017李井新	独立董事	1	0		21932017	#N/A	0			21932017	#N/A	0			21932017	#N/A	0			21932017	#N/A	0			21932017	#N/A	0			21932017
2193	2018	21932018	广东省	广东	广东2018	2.56495	0.0175543	黄利群	21932018黄利群	独立董事	1		李井新	21932018李井新	独立董事	1	0	苏晓	21932018苏晓	董事	0			21932018	#N/A	0			21932018	#N/A	0			21932018	#N/A	0			21932018	#N/A	0			21932018	#N/A	0			21932018
2195	2013	21952013	广东省	广东	广东2013	#N/A	0.0237707	陈乐波	21952013陈乐波	独立董事	1		潘世雷	21952013潘世雷	副董事长,副总经理	0		韩建法	21952013韩建法	独立董事	1	0		21952013	#N/A	0			21952013	#N/A	0			21952013	#N/A	0			21952013	#N/A	0			21952013	#N/A	0			21952013
2195	2016	21952016	上海市	上海	上海2016	2.70805	0.0157322	施健	21952016施健	独立董事	1		徐骏民	21952016徐骏民	独立董事	1	0	代小虎	21952016代小虎	董事,副总经理,财务负责人	0			21952016	#N/A	0			21952016	#N/A	0			21952016	#N/A	0			21952016	#N/A	0			21952016	#N/A	0			21952016
2195	2017	21952017	上海市	上海	上海2017	2.56495	0.0153257	施健	21952017施健	独立董事	1		徐骏民	21952017徐骏民	独立董事	1	0	代小虎	21952017代小虎	董事,副总经理,财务负责人	0			21952017	#N/A	0			21952017	#N/A	0			21952017	#N/A	0			21952017	#N/A	0			21952017	#N/A	0			21952017
2195	2018	21952018	上海市	上海	上海2018	3.3322	0.0169541	李健	21952018李健	独立董事	1		徐骏民	21952018徐骏民	独立董事	1	0	代小虎	21952018代小虎	董事,副总经理,财务负责人	0			21952018	#N/A	0			21952018	#N/A	0			21952018	#N/A	0			21952018	#N/A	0			21952018	#N/A	0			21952018
2196	2023	21962023	上海市	上海	上海2023	7.74889	#N/A	管芮	21962023管芮	非独立董事	0		陈林荣	21962023陈林荣	独立董事	1	0	戎云林	21962023戎云林	独立董事	1	0		21962023	#N/A	0			21962023	#N/A	0			21962023	#N/A	0			21962023	#N/A	0			21962023	#N/A	0			21962023
2198	2016	21982016	上海市	上海	上海2016	2.70805	0.0157322	周兰	21982016周兰	独立董事	1		陈耿豪	21982016陈耿豪	独立董事	1	0	黄利兵	21982016黄利兵	董事,总经理	0			21982016	#N/A	0			21982016	#N/A	0			21982016	#N/A	0			21982016	#N/A	0			21982016	#N/A	0			21982016
2198	2019	21982019	上海市	上海	上海2019	3.13549	0.0163504	程汉涛	21982019程汉涛	独立董事	1		方小波	21982019方小波	独立董事	1	0	代会波	21982019代会波	董事	0			21982019	#N/A	0			21982019	#N/A	0			21982019	#N/A	0			21982019	#N/A	0			21982019	#N/A	0			21982019
2198	2020	21982020	上海市	上海	上海2020	2.19722	0.0178784	程汉涛	21982020程汉涛	独立董事	1	1	方小波	21982020方小波	独立董事	1	0	代会波	21982020代会波	董事	0			21982020	#N/A	0			21982020	#N/A	0			21982020	#N/A	0			21982020	#N/A	0			21982020	#N/A	0			21982020
2199	2023	21992023	上海市	上海	上海2023	7.74889	#N/A	严臻	21992023严臻	独立董事	1		陈雄武	21992023陈雄武	独立董事	1	0	王皓	21992023王皓	董事长,总经理	0			21992023	#N/A	0			21992023	#N/A	0			21992023	#N/A	0			21992023	#N/A	0			21992023	#N/A	0			21992023
2200	2015	22002015	上海市	上海	上海2015	1.79176	0.0159259	尹晓冰	22002015尹晓冰	独立董事	1	1	尚志强	22002015尚志强	独立董事	1	0	李向丹	22002015李向丹	董事	0			22002015	#N/A	0			22002015	#N/A	0			22002015	#N/A	0			22002015	#N/A	0			22002015	#N/A	0			22002015
2201	2015	22012015	上海市	上海	上海2015	1.79176	0.0159259	谷正芬	22012015谷正芬	独立董事	1		陈尚	22012015陈尚	独立董事	1	0	徐荣	22012015徐荣	副董事长	0			22012015	#N/A	0			22012015	#N/A	0			22012015	#N/A	0			22012015	#N/A	0			22012015	#N/A	0			22012015
2201	2016	22012016	上海市	上海	上海2016	2.70805	0.0157322	谷正芬	22012016谷正芬	独立董事	1		陈尚	22012016陈尚	独立董事	1	0	徐荣	22012016徐荣	副董事长	0			22012016	#N/A	0			22012016	#N/A	0			22012016	#N/A	0			22012016	#N/A	0			22012016	#N/A	0			22012016
2203	2023	22032023	浙江省	浙江	浙江2023	9.74326	#N/A	陈东	22032023陈东	董事,财务总监	0		文献军	22032023文献军	独立董事	1	0	邓川	22032023邓川	独立董事	1	1		22032023	#N/A	0			22032023	#N/A	0			22032023	#N/A	0			22032023	#N/A	0			22032023	#N/A	0			22032023
2204	2023	22042023	辽宁省	辽宁	辽宁2023	7.84854	#N/A	马金城	22042023马金城	独立董事	1		王国峰	22042023王国峰	独立董事	1	0	唐睿明	22042023唐睿明	独立董事	1	0		22042023	#N/A	0			22042023	#N/A	0			22042023	#N/A	0			22042023	#N/A	0			22042023	#N/A	0			22042023
2205	2021	22052021	辽宁省	辽宁	辽宁2021	8.20056	0.0209414	谷秀娟	22052021谷秀娟	独立董事	1		董一鸣	22052021董一鸣	独立董事	1	0	杭宇	22052021杭宇	董事	0			22052021	#N/A	0			22052021	#N/A	0			22052021	#N/A	0			22052021	#N/A	0			22052021	#N/A	0			22052021
2208	2016	22082016	辽宁省	辽宁	辽宁2016	0.693147	0.018763	周亚娜	22082016周亚娜	独立董事	1		徐淑萍	22082016徐淑萍	独立董事	1	0	田峰	22082016田峰	董事,董事会秘书	0			22082016	#N/A	0			22082016	#N/A	0			22082016	#N/A	0			22082016	#N/A	0			22082016	#N/A	0			22082016
2208	2020	22082020	辽宁省	辽宁	辽宁2020	2.48491	0.0149852	周亚娜	22082020周亚娜	独立董事	1		徐淑萍	22082020徐淑萍	独立董事	1	0	田峰	22082020田峰	董事,董事会秘书	0			22082020	#N/A	0			22082020	#N/A	0			22082020	#N/A	0			22082020	#N/A	0			22082020	#N/A	0			22082020
2208	2022	22082022	辽宁省	辽宁	辽宁2022	8.10319	0.0205918	尹宗成	22082022尹宗成	独立董事	1		田峰	22082022田峰	董事,董事会秘书	0		周亚娜	22082022周亚娜	独立董事	1	0		22082022	#N/A	0			22082022	#N/A	0			22082022	#N/A	0			22082022	#N/A	0			22082022	#N/A	0			22082022
2209	2012	22092012	辽宁省	辽宁	辽宁2012	#N/A	0.0150034	余应敏	22092012余应敏	独立董事	1		陈钢	22092012陈钢	副董事长	0		李伯侨	22092012李伯侨	独立董事	1	0		22092012	#N/A	0			22092012	#N/A	0			22092012	#N/A	0			22092012	#N/A	0			22092012	#N/A	0			22092012
2209	2013	22092013	辽宁省	辽宁	辽宁2013	#N/A	0.0219805	黄德汉	22092013黄德汉	独立董事	1		陈钢	22092013陈钢	副董事长	0		王浩晖	22092013王浩晖	独立董事	1	0		22092013	#N/A	0			22092013	#N/A	0			22092013	#N/A	0			22092013	#N/A	0			22092013	#N/A	0			22092013
2209	2019	22092019	辽宁省	辽宁	辽宁2019	1.60944	0.0125022	余应敏	22092019余应敏	独立董事	1		肖林	22092019肖林	董事,总经理	0		梁彤	22092019梁彤	独立董事	1	0		22092019	#N/A	0			22092019	#N/A	0			22092019	#N/A	0			22092019	#N/A	0			22092019	#N/A	0			22092019
2210	2012	22102012	辽宁省	辽宁	辽宁2012	#N/A	0.0150034	熊楚熊	22102012熊楚熊	独立董事	1		赵自军	22102012赵自军	董事,副总经理	0		郑艳玲	22102012郑艳玲	独立董事	1	0		22102012	#N/A	0			22102012	#N/A	0			22102012	#N/A	0			22102012	#N/A	0			22102012	#N/A	0			22102012
2210	2013	22102013	辽宁省	辽宁	辽宁2013	#N/A	0.0219805	张革初	22102013张革初	独立董事	1		赵自军	22102013赵自军	副董事长	0		晏金发	22102013晏金发	独立董事	1	0		22102013	#N/A	0			22102013	#N/A	0			22102013	#N/A	0			22102013	#N/A	0			22102013	#N/A	0			22102013
2210	2016	22102016	辽宁省	辽宁	辽宁2016	0.693147	0.018763	张革初	22102016张革初	独立董事	1		赵自军	22102016赵自军	副董事长	0		晏金发	22102016晏金发	独立董事	1	0		22102016	#N/A	0			22102016	#N/A	0			22102016	#N/A	0			22102016	#N/A	0			22102016	#N/A	0			22102016
2211	2016	22112016	辽宁省	辽宁	辽宁2016	0.693147	0.018763	许良虎	22112016许良虎	独立董事	1		郭宝华	22112016郭宝华	独立董事	1	1	刘焱	22112016刘焱	董事	0			22112016	#N/A	0			22112016	#N/A	0			22112016	#N/A	0			22112016	#N/A	0			22112016	#N/A	0			22112016
2211	2017	22112017	辽宁省	辽宁	辽宁2017	1.09861	0.0147987	许良虎	22112017许良虎	独立董事	1	1	郭宝华	22112017郭宝华	独立董事	1	1	刘焱	22112017刘焱	董事	0			22112017	#N/A	0			22112017	#N/A	0			22112017	#N/A	0			22112017	#N/A	0			22112017	#N/A	0			22112017
2211	2018	22112018	辽宁省	辽宁	辽宁2018	1.60944	0.0153085	许良虎	22112018许良虎	独立董事	1	1	郭宝华	22112018郭宝华	独立董事	1	1	刘焱	22112018刘焱	董事	0			22112018	#N/A	0			22112018	#N/A	0			22112018	#N/A	0			22112018	#N/A	0			22112018	#N/A	0			22112018
2211	2022	22112022	辽宁省	辽宁	辽宁2022	8.10319	0.0205918	顾其荣	22112022顾其荣	独立董事	1		徐国兴	22112022徐国兴	非独立董事,总经理,董事会秘书	0		许良虎	22112022许良虎	独立董事	1	0		22112022	#N/A	0			22112022	#N/A	0			22112022	#N/A	0			22112022	#N/A	0			22112022	#N/A	0			22112022
2211	2023	22112023	辽宁省	辽宁	辽宁2023	7.84854	#N/A	顾其荣	22112023顾其荣	独立董事	1		徐国兴	22112023徐国兴	非独立董事,总经理	0		许良虎	22112023许良虎	独立董事	1	0		22112023	#N/A	0			22112023	#N/A	0			22112023	#N/A	0			22112023	#N/A	0			22112023	#N/A	0			22112023
2216	2020	22162020	河南省	河南	河南2020	5.15329	0.020523	郝秀琴	22162020郝秀琴	独立董事	1		臧冬斌	22162020臧冬斌	独立董事	1	0	张雷	22162020张雷	董事	0			22162020	#N/A	0			22162020	#N/A	0			22162020	#N/A	0			22162020	#N/A	0			22162020	#N/A	0			22162020
2216	2022	22162022	河南省	河南	河南2022	9.05439	0.0131279	郝秀琴	22162022郝秀琴	独立董事	1		任彦君	22162022任彦君	独立董事	1	0	张雷	22162022张雷	董事	0			22162022	#N/A	0			22162022	#N/A	0			22162022	#N/A	0			22162022	#N/A	0			22162022	#N/A	0			22162022
2216	2023	22162023	河南省	河南	河南2023	8.96814	#N/A	郝秀琴	22162023郝秀琴	独立董事	1		任彦君	22162023任彦君	独立董事	1	0	张雷	22162023张雷	董事	0			22162023	#N/A	0			22162023	#N/A	0			22162023	#N/A	0			22162023	#N/A	0			22162023	#N/A	0			22162023
2218	2015	22182015	广东省	广东	广东2015	0.693147	0.0185536	郭晋龙	22182015郭晋龙	独立董事	1	1	冯东	22182015冯东	独立董事	1	1	李粉莉	22182015李粉莉	副董事长,总经理	0			22182015	#N/A	0			22182015	#N/A	0			22182015	#N/A	0			22182015	#N/A	0			22182015	#N/A	0			22182015
2218	2016	22182016	广东省	广东	广东2016	1.94591	0.0237664	李青原	22182016李青原	独立董事	1		冯东	22182016冯东	独立董事	1	0	李粉莉	22182016李粉莉	副董事长	0			22182016	#N/A	0			22182016	#N/A	0			22182016	#N/A	0			22182016	#N/A	0			22182016	#N/A	0			22182016
2218	2023	22182023	广东省	广东	广东2023	9.88283	#N/A	王艳	22182023王艳	独立董事	1		王礼伟	22182023王礼伟	独立董事	1	0	李粉莉	22182023李粉莉	副董事长	0			22182023	#N/A	0			22182023	#N/A	0			22182023	#N/A	0			22182023	#N/A	0			22182023	#N/A	0			22182023
2219	2016	22192016	广东省	广东	广东2016	1.94591	0.0237664	王良成	22192016王良成	独立董事	1		周先敏	22192016周先敏	董事长	0		张雪梅	22192016张雪梅	独立董事	1	0		22192016	#N/A	0			22192016	#N/A	0			22192016	#N/A	0			22192016	#N/A	0			22192016	#N/A	0			22192016
2219	2017	22192017	广东省	广东	广东2017	2.70805	0.0163228	王良成	22192017王良成	独立董事	1		周先敏	22192017周先敏	董事长	0		张雪梅	22192017张雪梅	独立董事	1	0		22192017	#N/A	0			22192017	#N/A	0			22192017	#N/A	0			22192017	#N/A	0			22192017	#N/A	0			22192017
2219	2018	22192018	广东省	广东	广东2018	2.56495	0.0175543	王良成	22192018王良成	独立董事	1		周先敏	22192018周先敏	董事长	0		张雪梅	22192018张雪梅	独立董事	1	0		22192018	#N/A	0			22192018	#N/A	0			22192018	#N/A	0			22192018	#N/A	0			22192018	#N/A	0			22192018
2221	2020	22212020	江苏省	江苏	江苏2020	3.17805	0.0181944	赵湘莲	22212020赵湘莲	独立董事	1		陈兴淋	22212020陈兴淋	独立董事	1	0	林辉	22212020林辉	独立董事	1	0		22212020	#N/A	0			22212020	#N/A	0			22212020	#N/A	0			22212020	#N/A	0			22212020	#N/A	0			22212020
2221	2023	22212023	江苏省	江苏	江苏2023	9.39632	#N/A	陈兴淋	22212023陈兴淋	独立董事	1		赵湘莲	22212023赵湘莲	独立董事	1	1	林辉	22212023林辉	独立董事	1	0		22212023	#N/A	0			22212023	#N/A	0			22212023	#N/A	0			22212023	#N/A	0			22212023	#N/A	0			22212023
2222	2010	22222010	福建省	福建	福建2010	#N/A	0.0155004	梁巨元	22222010梁巨元	独立董事	1		王熙晏	22222010王熙晏	独立董事	1	0	洪茂椿	22222010洪茂椿	董事	0			22222010	#N/A	0			22222010	#N/A	0			22222010	#N/A	0			22222010	#N/A	0			22222010	#N/A	0			22222010
2222	2014	22222014	福建省	福建	福建2014	#N/A	0.0233178	颜永明	22222014颜永明	独立董事	1		曹荣	22222014曹荣	董事	0		孙敏	22222014孙敏	独立董事	1	0		22222014	#N/A	0			22222014	#N/A	0			22222014	#N/A	0			22222014	#N/A	0			22222014	#N/A	0			22222014
2222	2020	22222020	福建省	福建	福建2020	2.63906	0.0207933	陈炳玉	22222020陈炳玉	独立董事	1		李文	22222020李文	独立董事	1	0	兰国政	22222020兰国政	董事	0			22222020	#N/A	0			22222020	#N/A	0			22222020	#N/A	0			22222020	#N/A	0			22222020	#N/A	0			22222020
2223	2021	22232021	江苏省	江苏	江苏2021	9.90678	0.0192802	王千华	22232021王千华	独立董事	1		于春	22232021于春	独立董事	1	0	吴群	22232021吴群	董事长,总经理	0			22232021	#N/A	0			22232021	#N/A	0			22232021	#N/A	0			22232021	#N/A	0			22232021	#N/A	0			22232021
2224	2022	22242022	浙江省	浙江	浙江2022	9.81263	0.013772	沙建尧	22242022沙建尧	独立董事	1		吴琼瑛	22242022吴琼瑛	董事长,总经理	0		蒋建华	22242022蒋建华	独立董事	1	0		22242022	#N/A	0			22242022	#N/A	0			22242022	#N/A	0			22242022	#N/A	0			22242022	#N/A	0			22242022
2225	2021	22252021	浙江省	浙江	浙江2021	9.66402	0.0154038	牟敦潭	22252021牟敦潭	独立董事	1		徐殿利	22252021徐殿利	独立董事	1	0	史道明	22252021史道明	副董事长	0			22252021	#N/A	0			22252021	#N/A	0			22252021	#N/A	0			22252021	#N/A	0			22252021	#N/A	0			22252021
2226	2012	22262012	浙江省	浙江	浙江2012	#N/A	0.019422	杨棉之	22262012杨棉之	独立董事	1		李生校	22262012李生校	独立董事	1	0	欧飞能	22262012欧飞能	董事,副总裁	0			22262012	#N/A	0			22262012	#N/A	0			22262012	#N/A	0			22262012	#N/A	0			22262012	#N/A	0			22262012
2226	2013	22262013	浙江省	浙江	浙江2013	#N/A	0.0203306	杨棉之	22262013杨棉之	独立董事	1		李生校	22262013李生校	独立董事	1	0	欧飞能	22262013欧飞能	董事,副总裁	0			22262013	#N/A	0			22262013	#N/A	0			22262013	#N/A	0			22262013	#N/A	0			22262013	#N/A	0			22262013
2227	2011	22272011	浙江省	浙江	浙江2011	#N/A	0.0219653	王方华	22272011王方华	独立董事	1		李少弘	22272011李少弘	独立董事	1	0	王结	22272011王结	董事,副总经理	0			22272011	#N/A	0			22272011	#N/A	0			22272011	#N/A	0			22272011	#N/A	0			22272011	#N/A	0			22272011
2227	2015	22272015	浙江省	浙江	浙江2015	0.693147	0.022429	周俊祥	22272015周俊祥	独立董事	1		黄瑞	22272015黄瑞	独立董事	1	0	廖晓东	22272015廖晓东	副董事长,董事会秘书	0			22272015	#N/A	0			22272015	#N/A	0			22272015	#N/A	0			22272015	#N/A	0			22272015	#N/A	0			22272015
2227	2018	22272018	浙江省	浙江	浙江2018	1.79176	0.0193728	张宏图	22272018张宏图	独立董事	1		黄瑞	22272018黄瑞	独立董事	1	0	张翠瑛	22272018张翠瑛	董事	0			22272018	#N/A	0			22272018	#N/A	0			22272018	#N/A	0			22272018	#N/A	0			22272018	#N/A	0			22272018
2227	2019	22272019	浙江省	浙江	浙江2019	4.81218	0.0120027	张宏图	22272019张宏图	独立董事	1		黄瑞	22272019黄瑞	独立董事	1	0	张翠瑛	22272019张翠瑛	董事	0			22272019	#N/A	0			22272019	#N/A	0			22272019	#N/A	0			22272019	#N/A	0			22272019	#N/A	0			22272019
2228	2023	22282023	浙江省	浙江	浙江2023	9.74326	#N/A	许晓光	22282023许晓光	董事长,总经理	0		陈守德	22282023陈守德	独立董事	1	0	肖虹	22282023肖虹	独立董事	1	0		22282023	#N/A	0			22282023	#N/A	0			22282023	#N/A	0			22282023	#N/A	0			22282023	#N/A	0			22282023
2229	2012	22292012	福建省	福建	福建2012	#N/A	0.0174656	潘琰	22292012潘琰	独立董事	1		张新泽	22292012张新泽	独立董事	1	0	李云强	22292012李云强	董事	0			22292012	#N/A	0			22292012	#N/A	0			22292012	#N/A	0			22292012	#N/A	0			22292012	#N/A	0			22292012
2229	2013	22292013	福建省	福建	福建2013	#N/A	0.0214459	潘琰	22292013潘琰	独立董事	1		张新泽	22292013张新泽	独立董事	1	0	李云强	22292013李云强	董事	0			22292013	#N/A	0			22292013	#N/A	0			22292013	#N/A	0			22292013	#N/A	0			22292013	#N/A	0			22292013
2229	2015	22292015	福建省	福建	福建2015	1.38629	0.0206139	潘琰	22292015潘琰	独立董事	1		张新泽	22292015张新泽	独立董事	1	0	周美妹	22292015周美妹	董事	0			22292015	#N/A	0			22292015	#N/A	0			22292015	#N/A	0			22292015	#N/A	0			22292015	#N/A	0			22292015
2230	2013	22302013	安徽省	安徽	安徽2013	0.693147	0.0172233	潘立生	22302013潘立生	独立董事	1		钱进	22302013钱进	独立董事	1	0	苏俊	22302013苏俊	董事	0			22302013	#N/A	0			22302013	#N/A	0			22302013	#N/A	0			22302013	#N/A	0			22302013	#N/A	0			22302013
2230	2023	22302023	安徽省	安徽	安徽2023	9.15578	#N/A	张本照	22302023张本照	独立董事	1		吴慈生	22302023吴慈生	独立董事	1	0	段大为	22302023段大为	非独立董事,副总裁	0			22302023	#N/A	0			22302023	#N/A	0			22302023	#N/A	0			22302023	#N/A	0			22302023	#N/A	0			22302023
2231	2018	22312018	安徽省	安徽	安徽2018	2.3979	0.0204296	钟田丽	22312018钟田丽	独立董事	1		杜方	22312018杜方	董事长,总裁	0		黄鹏	22312018黄鹏	独立董事	1	0		22312018	#N/A	0			22312018	#N/A	0			22312018	#N/A	0			22312018	#N/A	0			22312018	#N/A	0			22312018
2231	2023	22312023	安徽省	安徽	安徽2023	9.15578	#N/A	房华	22312023房华	独立董事	1		杜方	22312023杜方	董事长,总裁	0		王宇航	22312023王宇航	独立董事	1	0		22312023	#N/A	0			22312023	#N/A	0			22312023	#N/A	0			22312023	#N/A	0			22312023	#N/A	0			22312023
2232	2014	22322014	安徽省	安徽	安徽2014	1.38629	0.0192843	孙立荣	22322014孙立荣	独立董事	1		陈贺新	22322014陈贺新	独立董事	1	0	李艰	22322014李艰	董事	0			22322014	#N/A	0			22322014	#N/A	0			22322014	#N/A	0			22322014	#N/A	0			22322014	#N/A	0			22322014
2232	2016	22322016	安徽省	安徽	安徽2016	3.2581	0.0221311	孙立荣	22322016孙立荣	独立董事	1		陈贺新	22322016陈贺新	独立董事	1	0	李艰	22322016李艰	董事	0			22322016	#N/A	0			22322016	#N/A	0			22322016	#N/A	0			22322016	#N/A	0			22322016	#N/A	0			22322016
2232	2019	22322019	安徽省	安徽	安徽2019	3.4012	0.0163229	孙立荣	22322019孙立荣	独立董事	1		高英	22322019高英	董事	0		于福	22322019于福	独立董事	1	0		22322019	#N/A	0			22322019	#N/A	0			22322019	#N/A	0			22322019	#N/A	0			22322019	#N/A	0			22322019
2234	2013	22342013	广东省	广东	广东2013	#N/A	0.0237707	冯玉光	22342013冯玉光	独立董事	1		宋晓	22342013宋晓	独立董事	1	0	张东明	22342013张东明	董事,副总经理,董事会秘书	0			22342013	#N/A	0			22342013	#N/A	0			22342013	#N/A	0			22342013	#N/A	0			22342013	#N/A	0			22342013
2234	2018	22342018	广东省	广东	广东2018	2.56495	0.0175543	张云龙	22342018张云龙	独立董事	1		胡卫华	22342018胡卫华	独立董事	1	0	张东明	22342018张东明	董事,副总经理,董事会秘书	0			22342018	#N/A	0			22342018	#N/A	0			22342018	#N/A	0			22342018	#N/A	0			22342018	#N/A	0			22342018
2234	2023	22342023	广东省	广东	广东2023	9.88283	#N/A	梁兰锋	22342023梁兰锋	独立董事	1		张东明	22342023张东明	董事,董事会秘书,副总经理	0		程永峰	22342023程永峰	独立董事	1	0		22342023	#N/A	0			22342023	#N/A	0			22342023	#N/A	0			22342023	#N/A	0			22342023	#N/A	0			22342023
2235	2015	22352015	广东省	广东	广东2015	0.693147	0.0185536	涂连东	22352015涂连东	独立董事	1		江曙晖	22352015江曙晖	独立董事	1	0	何少平	22352015何少平	董事	0			22352015	#N/A	0			22352015	#N/A	0			22352015	#N/A	0			22352015	#N/A	0			22352015	#N/A	0			22352015
2235	2023	22352023	广东省	广东	广东2023	9.88283	#N/A	江曙晖	22352023江曙晖	独立董事	1		何少平	22352023何少平	董事	0		苏伟斌	22352023苏伟斌	独立董事	1	0		22352023	#N/A	0			22352023	#N/A	0			22352023	#N/A	0			22352023	#N/A	0			22352023	#N/A	0			22352023
2236	2011	22362011	浙江省	浙江	浙江2011	#N/A	0.0219653	刘翰林	22362011刘翰林	独立董事	1		孙笑侠	22362011孙笑侠	独立董事	1	0	吴军	22362011吴军	副董事长,副总裁	0			22362011	#N/A	0			22362011	#N/A	0			22362011	#N/A	0			22362011	#N/A	0			22362011	#N/A	0			22362011
2236	2015	22362015	浙江省	浙江	浙江2015	0.693147	0.022429	王泽霞	22362015王泽霞	独立董事	1		何沛中	22362015何沛中	独立董事	1	0	吴军	22362015吴军	副董事长,副总裁	0			22362015	#N/A	0			22362015	#N/A	0			22362015	#N/A	0			22362015	#N/A	0			22362015	#N/A	0			22362015
2236	2016	22362016	浙江省	浙江	浙江2016	1.09861	0.026311	王泽霞	22362016王泽霞	独立董事	1		何沛中	22362016何沛中	独立董事	1	0	吴军	22362016吴军	副董事长,副总裁	0			22362016	#N/A	0			22362016	#N/A	0			22362016	#N/A	0			22362016	#N/A	0			22362016	#N/A	0			22362016
2236	2017	22362017	浙江省	浙江	浙江2017	1.09861	0.0181469	王泽霞	22362017王泽霞	独立董事	1	1	黄斯颖	22362017黄斯颖	独立董事	1	0	陈爱玲	22362017陈爱玲	董事	0			22362017	#N/A	0			22362017	#N/A	0			22362017	#N/A	0			22362017	#N/A	0			22362017	#N/A	0			22362017
2236	2018	22362018	浙江省	浙江	浙江2018	1.79176	0.0193728	王泽霞	22362018王泽霞	独立董事	1	1	黄斯颖	22362018黄斯颖	独立董事	1	0	陈爱玲	22362018陈爱玲	董事	0			22362018	#N/A	0			22362018	#N/A	0			22362018	#N/A	0			22362018	#N/A	0			22362018	#N/A	0			22362018
2236	2023	22362023	浙江省	浙江	浙江2023	9.74326	#N/A	曹衍龙	22362023曹衍龙	独立董事	1		刘翰林	22362023刘翰林	独立董事	1	0	陈爱玲	22362023陈爱玲	董事	0			22362023	#N/A	0			22362023	#N/A	0			22362023	#N/A	0			22362023	#N/A	0			22362023	#N/A	0			22362023
2237	2023	22372023	山东省	山东	山东2023	9.13669	#N/A	焦健	22372023焦健	独立董事	1	1	陈祖志	22372023陈祖志	董事,财务总监	0		王咏梅	22372023王咏梅	独立董事	1	1		22372023	#N/A	0			22372023	#N/A	0			22372023	#N/A	0			22372023	#N/A	0			22372023	#N/A	0			22372023
2238	2018	22382018	山东省	山东	山东2018	2.3979	0.0165044	张建军	22382018张建军	独立董事	1		邓均明	22382018邓均明	董事	0		宋建武	22382018宋建武	独立董事	1	0		22382018	#N/A	0			22382018	#N/A	0			22382018	#N/A	0			22382018	#N/A	0			22382018	#N/A	0			22382018
2238	2023	22382023	山东省	山东	山东2023	9.13669	#N/A	鄢国祥	22382023鄢国祥	独立董事	1		芮斌	22382023芮斌	独立董事	1	0		22382023	#N/A	0			22382023	#N/A	0			22382023	#N/A	0			22382023	#N/A	0			22382023	#N/A	0			22382023	#N/A	0			22382023
2240	2023	22402023	四川省	四川	四川2023	9.25043	#N/A	周祎	22402023周祎	非独立董事,董事长	0		周毅	22402023周毅	独立董事	1	0	马涛	22402023马涛	独立董事	1	0		22402023	#N/A	0			22402023	#N/A	0			22402023	#N/A	0			22402023	#N/A	0			22402023	#N/A	0			22402023
2242	2015	22422015	山东省	山东	山东2015	4.15888	0.0157355	张翠兰	22422015张翠兰	独立董事	1		汪建成	22422015汪建成	独立董事	1	0	杨宁宁	22422015杨宁宁	董事,副总经理	0			22422015	#N/A	0			22422015	#N/A	0			22422015	#N/A	0			22422015	#N/A	0			22422015	#N/A	0			22422015
2242	2016	22422016	山东省	山东	山东2016	#N/A	0.0178275	张翠兰	22422016张翠兰	独立董事	1		汪建成	22422016汪建成	独立董事	1	0	杨宁宁	22422016杨宁宁	董事,副总经理	0			22422016	#N/A	0			22422016	#N/A	0			22422016	#N/A	0			22422016	#N/A	0			22422016	#N/A	0			22422016
2242	2017	22422017	山东省	山东	山东2017	2.07944	0.0146452	张翠兰	22422017张翠兰	独立董事	1		汪建成	22422017汪建成	独立董事	1	0	杨宁宁	22422017杨宁宁	董事,副总经理	0			22422017	#N/A	0			22422017	#N/A	0			22422017	#N/A	0			22422017	#N/A	0			22422017	#N/A	0			22422017
2242	2018	22422018	山东省	山东	山东2018	2.3979	0.0165044	张翠兰	22422018张翠兰	独立董事	1		汪建成	22422018汪建成	独立董事	1	0	杨宁宁	22422018杨宁宁	董事,副总经理	0			22422018	#N/A	0			22422018	#N/A	0			22422018	#N/A	0			22422018	#N/A	0			22422018	#N/A	0			22422018
2242	2020	22422020	山东省	山东	山东2020	3.49651	0.0128581	刘红霞	22422020刘红霞	独立董事	1		杨宁宁	22422020杨宁宁	董事,总经理	0		韩世远	22422020韩世远	独立董事	1	0		22422020	#N/A	0			22422020	#N/A	0			22422020	#N/A	0			22422020	#N/A	0			22422020	#N/A	0			22422020
2242	2023	22422023	山东省	山东	山东2023	9.13669	#N/A	韩润	22422023韩润	副董事长,董事	0		刘红霞	22422023刘红霞	独立董事	1	0	韩世远	22422023韩世远	独立董事	1	0		22422023	#N/A	0			22422023	#N/A	0			22422023	#N/A	0			22422023	#N/A	0			22422023	#N/A	0			22422023
2243	2018	22432018	山东省	山东	山东2018	2.3979	0.0165044	梅月欣	22432018梅月欣	独立董事	1		居学成	22432018居学成	独立董事	1	1	苏启云	22432018苏启云	独立董事	1	0	方建宏	22432018方建宏	董事	0		张冬杰	22432018张冬杰	董事	0			22432018	#N/A	0			22432018	#N/A	0			22432018	#N/A	0			22432018
2243	2023	22432023	山东省	山东	山东2023	9.13669	#N/A	张汉斌	22432023张汉斌	独立董事	1		高建	22432023高建	独立董事	1	0	黄亚英	22432023黄亚英	独立董事	1	0	贺臻	22432023贺臻	董事长,总经理	0		刘仁辰	22432023刘仁辰	非独立董事	0			22432023	#N/A	0			22432023	#N/A	0			22432023	#N/A	0			22432023
2244	2014	22442014	浙江省	浙江	浙江2014	#N/A	0.0278689	于永生	22442014于永生	独立董事	1		杨全岁	22442014杨全岁	独立董事	1	0	莫建华	22442014莫建华	董事	0			22442014	#N/A	0			22442014	#N/A	0			22442014	#N/A	0			22442014	#N/A	0			22442014	#N/A	0			22442014
2244	2020	22442020	浙江省	浙江	浙江2020	4.26268	0.0131053	汪祥耀	22442020汪祥耀	独立董事	1		莫建华	22442020莫建华	董事	0		王曙光	22442020王曙光	独立董事	1	0		22442020	#N/A	0			22442020	#N/A	0			22442020	#N/A	0			22442020	#N/A	0			22442020	#N/A	0			22442020
2244	2022	22442022	浙江省	浙江	浙江2022	9.81263	0.013772	汪祥耀	22442022汪祥耀	独立董事	1		莫建华	22442022莫建华	董事	0		于永生	22442022于永生	独立董事	1	0		22442022	#N/A	0			22442022	#N/A	0			22442022	#N/A	0			22442022	#N/A	0			22442022	#N/A	0			22442022
2244	2023	22442023	浙江省	浙江	浙江2023	9.74326	#N/A	汪祥耀	22442023汪祥耀	独立董事	1		莫建华	22442023莫建华	董事	0		于永生	22442023于永生	独立董事	1	0		22442023	#N/A	0			22442023	#N/A	0			22442023	#N/A	0			22442023	#N/A	0			22442023	#N/A	0			22442023
2245	2012	22452012	浙江省	浙江	浙江2012	#N/A	0.019422	陈和平	22452012陈和平	独立董事	1		王国尧	22452012王国尧	独立董事	1	0	徐利英	22452012徐利英	董事	0			22452012	#N/A	0			22452012	#N/A	0			22452012	#N/A	0			22452012	#N/A	0			22452012	#N/A	0			22452012
2245	2016	22452016	浙江省	浙江	浙江2016	1.09861	0.026311	曹承宝	22452016曹承宝	独立董事	1		吕强	22452016吕强	独立董事	1	0	徐利英	22452016徐利英	董事	0			22452016	#N/A	0			22452016	#N/A	0			22452016	#N/A	0			22452016	#N/A	0			22452016	#N/A	0			22452016
2245	2018	22452018	浙江省	浙江	浙江2018	1.79176	0.0193728	曹承宝	22452018曹承宝	独立董事	1		吕强	22452018吕强	独立董事	1	0	徐利英	22452018徐利英	董事	0			22452018	#N/A	0			22452018	#N/A	0			22452018	#N/A	0			22452018	#N/A	0			22452018	#N/A	0			22452018
2245	2020	22452020	浙江省	浙江	浙江2020	4.26268	0.0131053	丁伟	22452020丁伟	独立董事	1		王亚雄	22452020王亚雄	独立董事	1	0	李科峰	22452020李科峰	董事	0			22452020	#N/A	0			22452020	#N/A	0			22452020	#N/A	0			22452020	#N/A	0			22452020	#N/A	0			22452020
2246	2013	22462013	四川省	四川	四川2013	#N/A	0.0157208	杨庆英	22462013杨庆英	独立董事	1		魏光源	22462013魏光源	董事,总经理	0		邹嵬	22462013邹嵬	董事	0		李金林	22462013李金林	独立董事	1	0		22462013	#N/A	0			22462013	#N/A	0			22462013	#N/A	0			22462013	#N/A	0			22462013
2246	2022	22462022	四川省	四川	四川2022	9.14452	0.0177539	胡获	22462022胡获	独立董事	1		矫劲松	22462022矫劲松	董事	0		张军	22462022张军	独立董事	1	0	杜兰平	22462022杜兰平	非独立董事,副总经理	0		步丹璐	22462022步丹璐	独立董事	1	1		22462022	#N/A	0			22462022	#N/A	0			22462022	#N/A	0			22462022
2246	2023	22462023	四川省	四川	四川2023	9.25043	#N/A	胡获	22462023胡获	独立董事	1		吕先锫	22462023吕先锫	独立董事	1	0	王乃华	22462023王乃华	职工代表董事	0		张永利	22462023张永利	独立董事	1	0	张军	22462023张军	独立董事	1	0		22462023	#N/A	0			22462023	#N/A	0			22462023	#N/A	0			22462023
2247	2011	22472011	四川省	四川	四川2011	#N/A	0.0171572	戴祥波	22472011戴祥波	独立董事	1		寿邹	22472011寿邹	独立董事	1	0	姜丽琴	22472011姜丽琴	董事,副总经理,财务总监	0			22472011	#N/A	0			22472011	#N/A	0			22472011	#N/A	0			22472011	#N/A	0			22472011	#N/A	0			22472011
2253	2016	22532016	上海市	上海	上海2016	2.70805	0.0157322	刘阳	22532016刘阳	独立董事	1		范自力	22532016范自力	独立董事	1	1	郑念新	22532016郑念新	董事	0			22532016	#N/A	0			22532016	#N/A	0			22532016	#N/A	0			22532016	#N/A	0			22532016	#N/A	0			22532016
2253	2018	22532018	上海市	上海	上海2018	3.3322	0.0169541	刘阳	22532018刘阳	独立董事	1		范自力	22532018范自力	独立董事	1	0	郑念新	22532018郑念新	董事	0			22532018	#N/A	0			22532018	#N/A	0			22532018	#N/A	0			22532018	#N/A	0			22532018	#N/A	0			22532018
2253	2019	22532019	上海市	上海	上海2019	3.13549	0.0163504	车晓昕	22532019车晓昕	独立董事	1		范自力	22532019范自力	独立董事	1	0	郑念新	22532019郑念新	董事	0			22532019	#N/A	0			22532019	#N/A	0			22532019	#N/A	0			22532019	#N/A	0			22532019	#N/A	0			22532019
2253	2020	22532020	上海市	上海	上海2020	2.19722	0.0178784	车晓昕	22532020车晓昕	独立董事	1		范自力	22532020范自力	独立董事	1	0	郑念新	22532020郑念新	董事	0			22532020	#N/A	0			22532020	#N/A	0			22532020	#N/A	0			22532020	#N/A	0			22532020	#N/A	0			22532020
2253	2023	22532023	上海市	上海	上海2023	7.74889	#N/A	范雄	22532023范雄	董事,总经理	0		王清云	22532023王清云	独立董事	1	0	车晓昕	22532023车晓昕	独立董事	1	0		22532023	#N/A	0			22532023	#N/A	0			22532023	#N/A	0			22532023	#N/A	0			22532023	#N/A	0			22532023
2255	2021	22552021	上海市	上海	上海2021	7.89357	0.0151057	于北方	22552021于北方	独立董事	1		张展宇	22552021张展宇	非独立董事	0		冯晓东	22552021冯晓东	独立董事	1	1		22552021	#N/A	0			22552021	#N/A	0			22552021	#N/A	0			22552021	#N/A	0			22552021	#N/A	0			22552021
2256	2013	22562013	上海市	上海	上海2013	0.693147	0.0166153	刘书锦	22562013刘书锦	独立董事	1		魏达志	22562013魏达志	独立董事	1	0	陈仕明	22562013陈仕明	独立董事	1	0	郭健	22562013郭健	董事长,监事会主席	0		李化春	22562013李化春	财务总监,董事会秘书,董事,副总经理	0			22562013	#N/A	0			22562013	#N/A	0			22562013	#N/A	0			22562013
2259	2016	22592016	四川省	四川	四川2016	0.693147	0.0172122	罗正英	22592016罗正英	独立董事	1		向中华	22592016向中华	董事,副总经理	0		向显湖	22592016向显湖	独立董事	1	0		22592016	#N/A	0			22592016	#N/A	0			22592016	#N/A	0			22592016	#N/A	0			22592016	#N/A	0			22592016
2259	2017	22592017	四川省	四川	四川2017	0.693147	0.0162732	罗正英	22592017罗正英	独立董事	1		向中华	22592017向中华	董事,副总经理	0		向显湖	22592017向显湖	独立董事	1	0		22592017	#N/A	0			22592017	#N/A	0			22592017	#N/A	0			22592017	#N/A	0			22592017	#N/A	0			22592017
2259	2022	22592022	四川省	四川	四川2022	9.14452	0.0177539	赖旭日	22592022赖旭日	董事长	0		何淑静	22592022何淑静	独立董事	1	0	王迪迪	22592022王迪迪	独立董事	1	0		22592022	#N/A	0			22592022	#N/A	0			22592022	#N/A	0			22592022	#N/A	0			22592022	#N/A	0			22592022
2259	2023	22592023	四川省	四川	四川2023	9.25043	#N/A	赖旭日	22592023赖旭日	董事长	0		何淑静	22592023何淑静	独立董事	1	0	王迪迪	22592023王迪迪	独立董事	1	0		22592023	#N/A	0			22592023	#N/A	0			22592023	#N/A	0			22592023	#N/A	0			22592023	#N/A	0			22592023
2261	2011	22612011	四川省	四川	四川2011	#N/A	0.0171572	周仁仪	22612011周仁仪	独立董事	1		李新宇	22612011李新宇	董事长	0		李仁发	22612011李仁发	独立董事	1	0		22612011	#N/A	0			22612011	#N/A	0			22612011	#N/A	0			22612011	#N/A	0			22612011	#N/A	0			22612011
2261	2014	22612014	四川省	四川	四川2014	#N/A	0.0166782	周仁仪	22612014周仁仪	独立董事	1		李新宇	22612014李新宇	董事长	0		李仁发	22612014李仁发	独立董事	1	0		22612014	#N/A	0			22612014	#N/A	0			22612014	#N/A	0			22612014	#N/A	0			22612014	#N/A	0			22612014
2261	2015	22612015	四川省	四川	四川2015	0.693147	0.0208623	周仁仪	22612015周仁仪	独立董事	1		李新宇	22612015李新宇	董事长	0		李仁发	22612015李仁发	独立董事	1	0		22612015	#N/A	0			22612015	#N/A	0			22612015	#N/A	0			22612015	#N/A	0			22612015	#N/A	0			22612015
2261	2018	22612018	四川省	四川	四川2018	3.17805	0.0199863	许长龙	22612018许长龙	独立董事	1		张忠革	22612018张忠革	董事	0		张跃	22612018张跃	独立董事	1	0		22612018	#N/A	0			22612018	#N/A	0			22612018	#N/A	0			22612018	#N/A	0			22612018	#N/A	0			22612018
2261	2019	22612019	四川省	四川	四川2019	2.70805	0.0202815	许长龙	22612019许长龙	独立董事	1		李新宇	22612019李新宇	董事长,总经理	0		张跃	22612019张跃	独立董事	1	0		22612019	#N/A	0			22612019	#N/A	0			22612019	#N/A	0			22612019	#N/A	0			22612019	#N/A	0			22612019
2263	2018	22632018	江苏省	江苏	江苏2018	2.56495	0.0202007	童宏怀	22632018童宏怀	独立董事	1		席日兰	22632018席日兰	董事	0		陶宝山	22632018陶宝山	独立董事	1	0		22632018	#N/A	0			22632018	#N/A	0			22632018	#N/A	0			22632018	#N/A	0			22632018	#N/A	0			22632018
2264	2016	22642016	江苏省	江苏	江苏2016	0.693147	0.0231946	张白	22642016张白	独立董事	1		黄建忠	22642016黄建忠	独立董事	1	0	郭建生	22642016郭建生	董事,董事会秘书	0			22642016	#N/A	0			22642016	#N/A	0			22642016	#N/A	0			22642016	#N/A	0			22642016	#N/A	0			22642016
2265	2010	22652010	江苏省	江苏	江苏2010	#N/A	0.0213009		22652010	#N/A	0			22652010	#N/A	0			22652010	#N/A	0			22652010	#N/A	0			22652010	#N/A	0			22652010	#N/A	0			22652010	#N/A	0			22652010	#N/A	0			22652010
2265	2013	22652013	江苏省	江苏	江苏2013	#N/A	0.0259388	谢云山	22652013谢云山	#N/A	0		林静	22652013林静	董事	0		邵卫锋	22652013邵卫锋	独立董事	1	0	朱锦余	22652013朱锦余	独立董事	1	0		22652013	#N/A	0			22652013	#N/A	0			22652013	#N/A	0			22652013	#N/A	0			22652013
2265	2014	22652014	江苏省	江苏	江苏2014	#N/A	0.0247383	林静	22652014林静	董事	0		邵卫锋	22652014邵卫锋	独立董事	1	0	朱锦余	22652014朱锦余	独立董事	1	0		22652014	#N/A	0			22652014	#N/A	0			22652014	#N/A	0			22652014	#N/A	0			22652014	#N/A	0			22652014
2265	2016	22652016	江苏省	江苏	江苏2016	0.693147	0.0231946	林静	22652016林静	董事	0		邵卫锋	22652016邵卫锋	独立董事	1	0	朱锦余	22652016朱锦余	独立董事	1	0		22652016	#N/A	0			22652016	#N/A	0			22652016	#N/A	0			22652016	#N/A	0			22652016	#N/A	0			22652016
2265	2017	22652017	江苏省	江苏	江苏2017	2.48491	0.0210849	王建新	22652017王建新	独立董事	1		吴以国	22652017吴以国	董事	0		于定明	22652017于定明	独立董事	1	0		22652017	#N/A	0			22652017	#N/A	0			22652017	#N/A	0			22652017	#N/A	0			22652017	#N/A	0			22652017
2265	2018	22652018	江苏省	江苏	江苏2018	2.56495	0.0202007	王建新	22652018王建新	独立董事	1		吴以国	22652018吴以国	董事	0		于定明	22652018于定明	独立董事	1	0		22652018	#N/A	0			22652018	#N/A	0			22652018	#N/A	0			22652018	#N/A	0			22652018	#N/A	0			22652018
2265	2019	22652019	江苏省	江苏	江苏2019	3.2581	0.0197087	叶明	22652019叶明	独立董事	1		吴以国	22652019吴以国	董事	0		于定明	22652019于定明	独立董事	1	1		22652019	#N/A	0			22652019	#N/A	0			22652019	#N/A	0			22652019	#N/A	0			22652019	#N/A	0			22652019
2265	2020	22652020	江苏省	江苏	江苏2020	3.17805	0.0181944	叶明	22652020叶明	独立董事	1		吴以国	22652020吴以国	董事	0		于定明	22652020于定明	独立董事	1	1		22652020	#N/A	0			22652020	#N/A	0			22652020	#N/A	0			22652020	#N/A	0			22652020	#N/A	0			22652020
2265	2022	22652022	江苏省	江苏	江苏2022	9.38597	0.0208616	陈旭东	22652022陈旭东	独立董事	1		吴以国	22652022吴以国	董事	0		于定明	22652022于定明	独立董事	1	1		22652022	#N/A	0			22652022	#N/A	0			22652022	#N/A	0			22652022	#N/A	0			22652022	#N/A	0			22652022
2266	2018	22662018	浙江省	浙江	浙江2018	1.79176	0.0193728	王宝庆	22662018王宝庆	独立董事	1		潘承东	22662018潘承东	非独立董事,总经理	0		李慧中	22662018李慧中	独立董事	1	0		22662018	#N/A	0			22662018	#N/A	0			22662018	#N/A	0			22662018	#N/A	0			22662018	#N/A	0			22662018
2267	2018	22672018	陕西省	陕西	陕西2018	6.60259	0.0192411	张俊瑞	22672018张俊瑞	独立董事	1		何雁明	22672018何雁明	独立董事	1	0	梁倩	22672018梁倩	董事,董事会秘书	0			22672018	#N/A	0			22672018	#N/A	0			22672018	#N/A	0			22672018	#N/A	0			22672018	#N/A	0			22672018
2268	2017	22682017	四川省	四川	四川2017	0.693147	0.0162732	周玮	22682017周玮	独立董事	1		曹德骏	22682017曹德骏	独立董事	1	0	卿昱	22682017卿昱	董事	0			22682017	#N/A	0			22682017	#N/A	0			22682017	#N/A	0			22682017	#N/A	0			22682017	#N/A	0			22682017
2268	2020	22682020	四川省	四川	四川2020	3.43399	0.0165098	周玮	22682020周玮	独立董事	1		段启广	22682020段启广	董事	0		冯渊	22682020冯渊	独立董事	1	0		22682020	#N/A	0			22682020	#N/A	0			22682020	#N/A	0			22682020	#N/A	0			22682020	#N/A	0			22682020
2268	2023	22682023	四川省	四川	四川2023	9.25043	#N/A	周玮	22682023周玮	独立董事	1		汪再军	22682023汪再军	非独立董事	0		冯渊	22682023冯渊	独立董事	1	0		22682023	#N/A	0			22682023	#N/A	0			22682023	#N/A	0			22682023	#N/A	0			22682023	#N/A	0			22682023
2269	2014	22692014	上海市	上海	上海2014	0.693147	0.0195843	单喆慜	22692014单喆慜	独立董事	1		郁亮	22692014郁亮	独立董事	1	0	周成建	22692014周成建	董事长,总经理	0			22692014	#N/A	0			22692014	#N/A	0			22692014	#N/A	0			22692014	#N/A	0			22692014	#N/A	0			22692014
2269	2015	22692015	上海市	上海	上海2015	1.79176	0.0159259	单喆慜	22692015单喆慜	独立董事	1		郁亮	22692015郁亮	独立董事	1	0	周成建	22692015周成建	董事长,总经理	0			22692015	#N/A	0			22692015	#N/A	0			22692015	#N/A	0			22692015	#N/A	0			22692015	#N/A	0			22692015
2273	2015	22732015	浙江省	浙江	浙江2015	0.693147	0.022429	蒋轶	22732015蒋轶	独立董事	1		程艳霞	22732015程艳霞	独立董事	1	0	蒋亦标	22732015蒋亦标	董事	0			22732015	#N/A	0			22732015	#N/A	0			22732015	#N/A	0			22732015	#N/A	0			22732015	#N/A	0			22732015
2273	2020	22732020	浙江省	浙江	浙江2020	4.26268	0.0131053	蒋轶	22732020蒋轶	独立董事	1		朱健飞	22732020朱健飞	独立董事	1	0	蒋亦标	22732020蒋亦标	董事	0			22732020	#N/A	0			22732020	#N/A	0			22732020	#N/A	0			22732020	#N/A	0			22732020	#N/A	0			22732020
2273	2022	22732022	浙江省	浙江	浙江2022	9.81263	0.013772	甘为民	22732022甘为民	独立董事	1		蒋亦标	22732022蒋亦标	董事	0		李宗彦	22732022李宗彦	独立董事	1	0		22732022	#N/A	0			22732022	#N/A	0			22732022	#N/A	0			22732022	#N/A	0			22732022	#N/A	0			22732022
2276	2016	22762016	广西壮族自治区	广西	广西2016	1.60944	0.0209049	杜烈康	22762016杜烈康	独立董事	1		邹峻	22762016邹峻	独立董事	1	1	姚伟国	22762016姚伟国	副董事长	0			22762016	#N/A	0			22762016	#N/A	0			22762016	#N/A	0			22762016	#N/A	0			22762016	#N/A	0			22762016
2276	2022	22762022	浙江省	浙江	浙江2022	9.81263	0.013772	傅怀全	22762022傅怀全	独立董事	1		周荣	22762022周荣	独立董事	1	0	徐志宾	22762022徐志宾	非独立董事	0			22762022	#N/A	0			22762022	#N/A	0			22762022	#N/A	0			22762022	#N/A	0			22762022	#N/A	0			22762022
2278	2017	22782017	浙江省	浙江	浙江2017	1.09861	0.0181469	孙大建	22782017孙大建	独立董事	1		成曦	22782017成曦	独立董事	1	0	刘国华	22782017刘国华	董事	0			22782017	#N/A	0			22782017	#N/A	0			22782017	#N/A	0			22782017	#N/A	0			22782017	#N/A	0			22782017
2279	2015	22792015	浙江省	浙江	浙江2015	0.693147	0.022429	祝卫	22792015祝卫	独立董事	1		韩凤岐	22792015韩凤岐	独立董事	1	0	邱安超	22792015邱安超	董事,副总经理,财务总监	0			22792015	#N/A	0			22792015	#N/A	0			22792015	#N/A	0			22792015	#N/A	0			22792015	#N/A	0			22792015
2279	2016	22792016	浙江省	浙江	浙江2016	1.09861	0.026311	戴金平	22792016戴金平	独立董事	1		韩凤岐	22792016韩凤岐	独立董事	1	0	邱安超	22792016邱安超	董事,副总经理,财务总监	0			22792016	#N/A	0			22792016	#N/A	0			22792016	#N/A	0			22792016	#N/A	0			22792016	#N/A	0			22792016
2279	2022	22792022	浙江省	浙江	浙江2022	9.81263	0.013772	李岳军	22792022李岳军	独立董事	1	1	邱安超	22792022邱安超	董事,高级副总裁	0		白萍	22792022白萍	独立董事	1	0		22792022	#N/A	0			22792022	#N/A	0			22792022	#N/A	0			22792022	#N/A	0			22792022	#N/A	0			22792022
2280	2010	22802010	浙江省	浙江	浙江2010	#N/A	0.0187642	陆国华	22802010陆国华	独立董事	1		蔡家楣	22802010蔡家楣	独立董事	1	0	乔文东	22802010乔文东	董事	0			22802010	#N/A	0			22802010	#N/A	0			22802010	#N/A	0			22802010	#N/A	0			22802010	#N/A	0			22802010
2280	2016	22802016	浙江省	浙江	浙江2016	1.09861	0.026311	李宏	22802016李宏	独立董事	1		潘斌	22802016潘斌	独立董事	1	0	陈理	22802016陈理	非独立董事	0			22802016	#N/A	0			22802016	#N/A	0			22802016	#N/A	0			22802016	#N/A	0			22802016	#N/A	0			22802016
2281	2015	22812015	湖北省	湖北	湖北2015	1.79176	0.0190792	张敦力	22812015张敦力	独立董事	1		夏存海	22812015夏存海	董事	0		蔡学恩	22812015蔡学恩	独立董事	1	1	马洪	22812015马洪	独立董事	1	0	张友棠	22812015张友棠	独立董事	1	0		22812015	#N/A	0			22812015	#N/A	0			22812015	#N/A	0			22812015
2281	2016	22812016	湖北省	湖北	湖北2016	2.70805	0.0187492	张敦力	22812016张敦力	独立董事	1		夏存海	22812016夏存海	副董事长	0		蔡学恩	22812016蔡学恩	独立董事	1	1	马洪	22812016马洪	独立董事	1	0	张友棠	22812016张友棠	独立董事	1	0		22812016	#N/A	0			22812016	#N/A	0			22812016	#N/A	0			22812016
2282	2013	22822013	湖北省	湖北	湖北2013	0.693147	0.0141928	张双才	22822013张双才	独立董事	1		陈晋蓉	22822013陈晋蓉	独立董事	1	0	张淑玉	22822013张淑玉	董事	0			22822013	#N/A	0			22822013	#N/A	0			22822013	#N/A	0			22822013	#N/A	0			22822013	#N/A	0			22822013
2283	2023	22832023	湖北省	湖北	湖北2023	9.08795	#N/A	曲国霞	22832023曲国霞	独立董事	1		孙海涛	22832023孙海涛	副董事长	0		孟红	22832023孟红	独立董事	1	0		22832023	#N/A	0			22832023	#N/A	0			22832023	#N/A	0			22832023	#N/A	0			22832023	#N/A	0			22832023
2284	2017	22842017	湖北省	湖北	湖北2017	2.3979	0.021246	黄曼行	22842017黄曼行	独立董事	1		俞小莉	22842017俞小莉	独立董事	1	0	黄来兴	22842017黄来兴	副董事长	0			22842017	#N/A	0			22842017	#N/A	0			22842017	#N/A	0			22842017	#N/A	0			22842017	#N/A	0			22842017
2286	2015	22862015	山东省	山东	山东2015	4.15888	0.0157355	聂伟才	22862015聂伟才	独立董事	1		宿玉海	22862015宿玉海	独立董事	1	0	薛建平	22862015薛建平	副董事长	0			22862015	#N/A	0			22862015	#N/A	0			22862015	#N/A	0			22862015	#N/A	0			22862015	#N/A	0			22862015
2286	2020	22862020	山东省	山东	山东2020	3.49651	0.0128581	杨高宇	22862020杨高宇	独立董事	1		宿玉海	22862020宿玉海	独立董事	1	0	秦翠萍	22862020秦翠萍	董事	0			22862020	#N/A	0			22862020	#N/A	0			22862020	#N/A	0			22862020	#N/A	0			22862020	#N/A	0			22862020
2287	2018	22872018	西藏自治区	西藏	西藏2018	1.38629	0.0217324	李春瑜	22872018李春瑜	独立董事	1		雷菊芳	22872018雷菊芳	董事长	0		杜守颖	22872018杜守颖	独立董事	1	0		22872018	#N/A	0			22872018	#N/A	0			22872018	#N/A	0			22872018	#N/A	0			22872018	#N/A	0			22872018
2289	2017	22892017	西藏自治区	西藏	西藏2017	#N/A	0.0180559	刘力	22892017刘力	独立董事	1		冯科	22892017冯科	独立董事	1	0	陈莹	22892017陈莹	董事	0			22892017	#N/A	0			22892017	#N/A	0			22892017	#N/A	0			22892017	#N/A	0			22892017	#N/A	0			22892017
2290	2020	22902020	西藏自治区	西藏	西藏2020	1.09861	0.0203523	张志康	22902020张志康	独立董事	1		王智敏	22902020王智敏	董事	0		贾国华	22902020贾国华	独立董事	1	0		22902020	#N/A	0			22902020	#N/A	0			22902020	#N/A	0			22902020	#N/A	0			22902020	#N/A	0			22902020
2291	2020	22912020	西藏自治区	西藏	西藏2020	1.09861	0.0203523		22912020	#N/A	0			22912020	#N/A	0			22912020	#N/A	0			22912020	#N/A	0			22912020	#N/A	0			22912020	#N/A	0			22912020	#N/A	0			22912020	#N/A	0			22912020
2292	2012	22922012	广东省	广东	广东2012	0.693147	0.0230561	蔡少河	22922012蔡少河	独立董事	1		蔡东青	22922012蔡东青	董事长,总经理	0		邓金华	22922012邓金华	董事,副总经理,财务总监	0		李卓明	22922012李卓明	独立董事	1	0		22922012	#N/A	0			22922012	#N/A	0			22922012	#N/A	0			22922012	#N/A	0			22922012
2292	2015	22922015	广东省	广东	广东2015	0.693147	0.0185536	谭燕	22922015谭燕	独立董事	1		蔡晓东	22922015蔡晓东	董事,副总经理	0		丑建忠	22922015丑建忠	独立董事	1	0		22922015	#N/A	0			22922015	#N/A	0			22922015	#N/A	0			22922015	#N/A	0			22922015	#N/A	0			22922015
2293	2023	22932023	江苏省	江苏	江苏2023	9.39632	#N/A	唐善永	22932023唐善永	独立董事	1		田志伟	22932023田志伟	独立董事	1	0	薛伟成	22932023薛伟成	董事长	0			22932023	#N/A	0			22932023	#N/A	0			22932023	#N/A	0			22932023	#N/A	0			22932023	#N/A	0			22932023
2295	2010	22952010	广东省	广东	广东2010	#N/A	0.0216352		22952010	#N/A	0			22952010	#N/A	0			22952010	#N/A	0			22952010	#N/A	0			22952010	#N/A	0			22952010	#N/A	0			22952010	#N/A	0			22952010	#N/A	0			22952010
2296	2012	22962012	广东省	广东	广东2012	0.693147	0.0230561	谭宪才	22962012谭宪才	独立董事	1		蒋承	22962012蒋承	独立董事	1	0	李劲松	22962012李劲松	董事	0			22962012	#N/A	0			22962012	#N/A	0			22962012	#N/A	0			22962012	#N/A	0			22962012	#N/A	0			22962012
2296	2013	22962013	河南省	河南	河南2013	1.79176	0.0150365	谭宪才	22962013谭宪才	独立董事	1		蒋承	22962013蒋承	独立董事	1	0	谢春生	22962013谢春生	董事	0			22962013	#N/A	0			22962013	#N/A	0			22962013	#N/A	0			22962013	#N/A	0			22962013	#N/A	0			22962013
2296	2015	22962015	河南省	河南	河南2015	3.3322	0.016777	谭宪才	22962015谭宪才	独立董事	1		李海鹰	22962015李海鹰	董事长	0		蒋承	22962015蒋承	独立董事	1	0		22962015	#N/A	0			22962015	#N/A	0			22962015	#N/A	0			22962015	#N/A	0			22962015	#N/A	0			22962015
2296	2017	22962017	河南省	河南	河南2017	3.4012	0.0197107	郑建彪	22962017郑建彪	独立董事	1		谢春生	22962017谢春生	董事,总经理	0		张宇锋	22962017张宇锋	独立董事	1	0		22962017	#N/A	0			22962017	#N/A	0			22962017	#N/A	0			22962017	#N/A	0			22962017	#N/A	0			22962017
2296	2018	22962018	河南省	河南	河南2018	4.46591	0.0189316	郑建彪	22962018郑建彪	独立董事	1		谢春生	22962018谢春生	董事,总经理	0		张宇锋	22962018张宇锋	独立董事	1	0		22962018	#N/A	0			22962018	#N/A	0			22962018	#N/A	0			22962018	#N/A	0			22962018	#N/A	0			22962018
2298	2013	22982013	湖南省	湖南	湖南2013	1.09861	0.0222391	汪和俊	22982013汪和俊	独立董事	1		肖学东	22982013肖学东	独立董事	1	0	束龙胜	22982013束龙胜	董事长	0			22982013	#N/A	0			22982013	#N/A	0			22982013	#N/A	0			22982013	#N/A	0			22982013	#N/A	0			22982013
2301	2015	23012015	福建省	福建	福建2015	1.38629	0.0206139	王惠玲	23012015王惠玲	独立董事	1		陈燕燕	23012015陈燕燕	独立董事	1	0	陈钦武	23012015陈钦武	董事	0			23012015	#N/A	0			23012015	#N/A	0			23012015	#N/A	0			23012015	#N/A	0			23012015	#N/A	0			23012015
2301	2019	23012019	福建省	福建	福建2019	3.13549	0.0220985	韩文君	23012019韩文君	独立董事	1		胡泽禹	23012019胡泽禹	独立董事	1	0	陆继强	23012019陆继强	非独立董事	0			23012019	#N/A	0			23012019	#N/A	0			23012019	#N/A	0			23012019	#N/A	0			23012019	#N/A	0			23012019
2304	2015	23042015	江苏省	江苏	江苏2015	#N/A	0.0237915	陈同广	23042015陈同广	独立董事	1		钟玉叶	23042015钟玉叶	董事,副总裁	0		蔡云清	23042015蔡云清	独立董事	1	0		23042015	#N/A	0			23042015	#N/A	0			23042015	#N/A	0			23042015	#N/A	0			23042015	#N/A	0			23042015
2304	2017	23042017	江苏省	江苏	江苏2017	2.48491	0.0210849	陈同广	23042017陈同广	独立董事	1		钟玉叶	23042017钟玉叶	董事,副总裁	0		蔡云清	23042017蔡云清	独立董事	1	0		23042017	#N/A	0			23042017	#N/A	0			23042017	#N/A	0			23042017	#N/A	0			23042017	#N/A	0			23042017
2304	2020	23042020	江苏省	江苏	江苏2020	3.17805	0.0181944	陈同广	23042020陈同广	独立董事	1		钟雨	23042020钟雨	副董事长,总裁	0		蔡云清	23042020蔡云清	独立董事	1	0		23042020	#N/A	0			23042020	#N/A	0			23042020	#N/A	0			23042020	#N/A	0			23042020	#N/A	0			23042020
2305	2023	23052023	江苏省	江苏	江苏2023	9.39632	#N/A	俞波	23052023俞波	独立董事	1		蒋大兴	23052023蒋大兴	独立董事	1	0	谈晓君	23052023谈晓君	董事	0			23052023	#N/A	0			23052023	#N/A	0			23052023	#N/A	0			23052023	#N/A	0			23052023	#N/A	0			23052023
2306	2017	23062017	江苏省	江苏	江苏2017	2.48491	0.0210849	牛红军	23062017牛红军	独立董事	1		王禹皓	23062017王禹皓	董事长,总裁	0		王璐	23062017王璐	独立董事	1	0		23062017	#N/A	0			23062017	#N/A	0			23062017	#N/A	0			23062017	#N/A	0			23062017	#N/A	0			23062017
2306	2018	23062018	江苏省	江苏	江苏2018	2.56495	0.0202007	鲁亮升	23062018鲁亮升	独立董事	1		王椿芳	23062018王椿芳	独立董事	1	0	王禹皓	23062018王禹皓	董事长,副董事长,总裁,执行总经理	0			23062018	#N/A	0			23062018	#N/A	0			23062018	#N/A	0			23062018	#N/A	0			23062018	#N/A	0			23062018
2306	2020	23062020	江苏省	江苏	江苏2020	3.17805	0.0181944	邓青	23062020邓青	独立董事	1		陈叶秋	23062020陈叶秋	独立董事	1	0	王禹皓	23062020王禹皓	副董事长,执行总经理	0			23062020	#N/A	0			23062020	#N/A	0			23062020	#N/A	0			23062020	#N/A	0			23062020	#N/A	0			23062020
2306	2023	23062023	江苏省	江苏	江苏2023	9.39632	#N/A	沈洪秀	23062023沈洪秀	非独立董事,内部审计负责人	0		邓青	23062023邓青	独立董事	1	0	陈叶秋	23062023陈叶秋	独立董事	1	0		23062023	#N/A	0			23062023	#N/A	0			23062023	#N/A	0			23062023	#N/A	0			23062023	#N/A	0			23062023
2307	2022	23072022	江苏省	江苏	江苏2022	9.38597	0.0208616	李斌	23072022李斌	独立董事	1		张斌	23072022张斌	董事长	0		季红	23072022季红	独立董事	1	0		23072022	#N/A	0			23072022	#N/A	0			23072022	#N/A	0			23072022	#N/A	0			23072022	#N/A	0			23072022
2307	2023	23072023	江苏省	江苏	江苏2023	9.39632	#N/A	李斌	23072023李斌	独立董事	1		张斌	23072023张斌	党委书记,董事长	0		季红	23072023季红	独立董事	1	0		23072023	#N/A	0			23072023	#N/A	0			23072023	#N/A	0			23072023	#N/A	0			23072023	#N/A	0			23072023
2308	2013	23082013	广东省	广东	广东2013	#N/A	0.0237707	刘国常	23082013刘国常	独立董事,监事	1		曹洲涛	23082013曹洲涛	独立董事	1	0	刘建国	23082013刘建国	董事	0			23082013	#N/A	0			23082013	#N/A	0			23082013	#N/A	0			23082013	#N/A	0			23082013	#N/A	0			23082013
2308	2018	23082018	广东省	广东	广东2018	2.56495	0.0175543	胡志勇	23082018胡志勇	独立董事	1		杨永福	23082018杨永福	独立董事	1	0	曹洲涛	23082018曹洲涛	董事	0			23082018	#N/A	0			23082018	#N/A	0			23082018	#N/A	0			23082018	#N/A	0			23082018	#N/A	0			23082018
2309	2017	23092017	江苏省	江苏	江苏2017	2.48491	0.0210849	李莹	23092017李莹	独立董事	1		马晓虹	23092017马晓虹	董事	0		金晓峰	23092017金晓峰	独立董事	1	0		23092017	#N/A	0			23092017	#N/A	0			23092017	#N/A	0			23092017	#N/A	0			23092017	#N/A	0			23092017
2310	2010	23102010	北京市	北京	北京2010	0.693147	0.0194632	何巧女	23102010何巧女	董事长,总经理	0		江锡如	23102010江锡如	独立董事	1	0	周宇騉	23102010周宇騉	独立董事	1	0		23102010	#N/A	0			23102010	#N/A	0			23102010	#N/A	0			23102010	#N/A	0			23102010	#N/A	0			23102010
2311	2017	23112017	广东省	广东	广东2017	2.70805	0.0163228	邓尔慷	23112017邓尔慷	独立董事	1	1	李新春	23112017李新春	独立董事	1	0	田丽	23112017田丽	副总经理,董事	0			23112017	#N/A	0			23112017	#N/A	0			23112017	#N/A	0			23112017	#N/A	0			23112017	#N/A	0			23112017
2311	2019	23112019	广东省	广东	广东2019	2.77259	0.0140111	刘运国	23112019刘运国	独立董事	1		何建国	23112019何建国	独立董事	1	0	田丽	23112019田丽	董事,副总经理	0			23112019	#N/A	0			23112019	#N/A	0			23112019	#N/A	0			23112019	#N/A	0			23112019	#N/A	0			23112019
2311	2023	23112023	广东省	广东	广东2023	9.88283	#N/A	刘运国	23112023刘运国	独立董事	1		桂建芳	23112023桂建芳	独立董事	1	1	何建国	23112023何建国	独立董事	1	0		23112023	#N/A	0			23112023	#N/A	0			23112023	#N/A	0			23112023	#N/A	0			23112023	#N/A	0			23112023
2312	2023	23122023	广东省	广东	广东2023	9.88283	#N/A	马永强	23122023马永强	独立董事	1		周友苏	23122023周友苏	独立董事	1	0	陈重	23122023陈重	非独立董事	0			23122023	#N/A	0			23122023	#N/A	0			23122023	#N/A	0			23122023	#N/A	0			23122023	#N/A	0			23122023
2313	2018	23132018	广东省	广东	广东2018	2.56495	0.0175543	曾庆生	23132018曾庆生	独立董事	1		项立刚	23132018项立刚	独立董事	1	0	吴永平	23132018吴永平	职工代表董事,副总经理	0			23132018	#N/A	0			23132018	#N/A	0			23132018	#N/A	0			23132018	#N/A	0			23132018	#N/A	0			23132018
2313	2020	23132020	广东省	广东	广东2020	2.83321	0.0174561	宋德亮	23132020宋德亮	独立董事	1		项立刚	23132020项立刚	独立董事	1	0	李玮	23132020李玮	副总经理,董事会秘书,职工代表董事	0			23132020	#N/A	0			23132020	#N/A	0			23132020	#N/A	0			23132020	#N/A	0			23132020	#N/A	0			23132020
2317	2010	23172010	广东省	广东	广东2010	#N/A	0.0216352		23172010	#N/A	0			23172010	#N/A	0			23172010	#N/A	0			23172010	#N/A	0			23172010	#N/A	0			23172010	#N/A	0			23172010	#N/A	0			23172010	#N/A	0			23172010
2318	2018	23182018	广东省	广东	广东2018	2.56495	0.0175543	缪兰娟	23182018缪兰娟	独立董事	1		郑万青	23182018郑万青	独立董事	1	0	章宇旭	23182018章宇旭	非独立董事	0			23182018	#N/A	0			23182018	#N/A	0			23182018	#N/A	0			23182018	#N/A	0			23182018	#N/A	0			23182018
2319	2013	23192013	广东省	广东	广东2013	#N/A	0.0237707	汤金木	23192013汤金木	独立董事	1		程法光	23192013程法光	独立董事	1	0	李华	23192013李华	副总经理,董事会秘书	0			23192013	#N/A	0			23192013	#N/A	0			23192013	#N/A	0			23192013	#N/A	0			23192013	#N/A	0			23192013
2319	2014	23192014	广东省	广东	广东2014	#N/A	0.0224623	万良勇	23192014万良勇	独立董事	1		贾绍华	23192014贾绍华	独立董事	1	0	黄秋英	23192014黄秋英	非独立董事,财务总监	0			23192014	#N/A	0			23192014	#N/A	0			23192014	#N/A	0			23192014	#N/A	0			23192014	#N/A	0			23192014
2321	2013	23212013	广东省	广东	广东2013	#N/A	0.0237707	尹效华	23212013尹效华	独立董事	1		孟素荷	23212013孟素荷	独立董事	1	0	赵虎林	23212013赵虎林	独立董事	1	1	闵群	23212013闵群	董事,常务副总经理	0		曹龙根	23212013曹龙根	董事	0			23212013	#N/A	0			23212013	#N/A	0			23212013	#N/A	0			23212013
2321	2016	23212016	广东省	广东	广东2016	1.94591	0.0237664	朱虎平	23212016朱虎平	独立董事	1		闵群	23212016闵群	董事,常务副总经理	0		汪开江	23212016汪开江	董事,副总经理,财务总监	0		孟素荷	23212016孟素荷	独立董事	1	0	赵虎林	23212016赵虎林	独立董事	1	1		23212016	#N/A	0			23212016	#N/A	0			23212016	#N/A	0			23212016
2322	2010	23222010	广东省	广东	广东2010	#N/A	0.0216352	宗文龙	23222010宗文龙	独立董事	1		郭振岩	23222010郭振岩	独立董事	1	0	余艇	23222010余艇	副董事长	0			23222010	#N/A	0			23222010	#N/A	0			23222010	#N/A	0			23222010	#N/A	0			23222010	#N/A	0			23222010
2322	2011	23222011	广东省	广东	广东2011	#N/A	0.0199093	宗文龙	23222011宗文龙	独立董事	1		郭振岩	23222011郭振岩	独立董事	1	0	余艇	23222011余艇	副董事长	0			23222011	#N/A	0			23222011	#N/A	0			23222011	#N/A	0			23222011	#N/A	0			23222011	#N/A	0			23222011
2323	2011	23232011	广东省	广东	广东2011	#N/A	0.0199093	许继红	23232011许继红	董事	0		王昌来	23232011王昌来	独立董事	1	0	卢新国	23232011卢新国	独立董事	1	0		23232011	#N/A	0			23232011	#N/A	0			23232011	#N/A	0			23232011	#N/A	0			23232011	#N/A	0			23232011
2323	2014	23232014	广东省	广东	广东2014	#N/A	0.0224623	许慧	23232014许慧	非独立董事	0		计高成	23232014计高成	独立董事	1	0	谭德旺	23232014谭德旺	独立董事	1	0		23232014	#N/A	0			23232014	#N/A	0			23232014	#N/A	0			23232014	#N/A	0			23232014	#N/A	0			23232014
2324	2020	23242020	广东省	广东	广东2020	2.83321	0.0174561	赵世君	23242020赵世君	独立董事	1		吴星宇	23242020吴星宇	独立董事	1	1	周武	23242020周武	副董事长,副总经理	0			23242020	#N/A	0			23242020	#N/A	0			23242020	#N/A	0			23242020	#N/A	0			23242020	#N/A	0			23242020
2326	2011	23262011	广东省	广东	广东2011	#N/A	0.0199093	许永斌	23262011许永斌	独立董事	1	1	刘嘉	23262011刘嘉	独立董事	1	0	刘元	23262011刘元	独立董事	1	0	王莺妹	23262011王莺妹	董事长	0		何人宝	23262011何人宝	董事,总经理	0			23262011	#N/A	0			23262011	#N/A	0			23262011	#N/A	0			23262011
2326	2012	23262012	广东省	广东	广东2012	0.693147	0.0230561	许永斌	23262012许永斌	独立董事	1	1	刘嘉	23262012刘嘉	独立董事	1	0	刘元	23262012刘元	独立董事	1	0	王莺妹	23262012王莺妹	董事长	0		何人宝	23262012何人宝	总经理	0			23262012	#N/A	0			23262012	#N/A	0			23262012	#N/A	0			23262012
2327	2012	23272012	广东省	广东	广东2012	0.693147	0.0230561	李斌	23272012李斌	独立董事	1		刘澄清	23272012刘澄清	独立董事	1	0	陈国红	23272012陈国红	董事,副总经理	0			23272012	#N/A	0			23272012	#N/A	0			23272012	#N/A	0			23272012	#N/A	0			23272012	#N/A	0			23272012
2328	2020	23282020	广东省	广东	广东2020	2.83321	0.0174561	王怀刚	23282020王怀刚	独立董事	1		程博	23282020程博	独立董事	1	0	李文君	23282020李文君	非独立董事,副总裁,董事会秘书	0			23282020	#N/A	0			23282020	#N/A	0			23282020	#N/A	0			23282020	#N/A	0			23282020	#N/A	0			23282020
2329	2018	23292018	广东省	广东	广东2018	2.56495	0.0175543	陈永利	23292018陈永利	独立董事	1		陈亮	23292018陈亮	独立董事	1	0	许春明	23292018许春明	独立董事	1	0	何海晏	23292018何海晏	副董事长	0		王婉芳	23292018王婉芳	董事,董事会秘书	0			23292018	#N/A	0			23292018	#N/A	0			23292018	#N/A	0			23292018
2330	2017	23302017	广东省	广东	广东2017	2.70805	0.0163228	郑思敏	23302017郑思敏	董事长	0		张永爱	23302017张永爱	独立董事	1	0	王德建	23302017王德建	独立董事	1	0		23302017	#N/A	0			23302017	#N/A	0			23302017	#N/A	0			23302017	#N/A	0			23302017	#N/A	0			23302017
2330	2019	23302019	广东省	广东	广东2019	2.77259	0.0140111	郑思敏	23302019郑思敏	董事长	0		张永爱	23302019张永爱	独立董事	1	0	王德建	23302019王德建	独立董事	1	0		23302019	#N/A	0			23302019	#N/A	0			23302019	#N/A	0			23302019	#N/A	0			23302019	#N/A	0			23302019
2330	2020	23302020	广东省	广东	广东2020	2.83321	0.0174561	王德建	23302020王德建	独立董事	1		张永爱	23302020张永爱	独立董事	1	0	郑思敏	23302020郑思敏	董事长	0			23302020	#N/A	0			23302020	#N/A	0			23302020	#N/A	0			23302020	#N/A	0			23302020	#N/A	0			23302020
2330	2022	23302022	广东省	广东	广东2022	9.96857	0.0155058	王德建	23302022王德建	独立董事	1		张永爱	23302022张永爱	独立董事	1	0	郑思敏	23302022郑思敏	董事长	0			23302022	#N/A	0			23302022	#N/A	0			23302022	#N/A	0			23302022	#N/A	0			23302022	#N/A	0			23302022
2331	2020	23312020	安徽省	安徽	安徽2020	4.69135	0.011744	罗守生	23312020罗守生	独立董事	1		李臻	23312020李臻	董事长,非独立董事,副董事长	0		周艳	23312020周艳	独立董事	1	0		23312020	#N/A	0			23312020	#N/A	0			23312020	#N/A	0			23312020	#N/A	0			23312020	#N/A	0			23312020
2332	2010	23322010	安徽省	安徽	安徽2010	0.693147	0.0148976	张红英	23322010张红英	独立董事	1		施洵	23322010施洵	独立董事	1	0	廖杰	23322010廖杰	独立董事	1	0	郭建英	23322010郭建英	董事	0		张南	23322010张南	董事,董事会秘书	0			23322010	#N/A	0			23322010	#N/A	0			23322010	#N/A	0			23322010
2333	2011	23332011	安徽省	安徽	安徽2011	0.693147	0.0177839	黄鹏	23332011黄鹏	独立董事	1		潘家柱	23332011潘家柱	独立董事	1	0	钱芳	23332011钱芳	董事,总经理	0			23332011	#N/A	0			23332011	#N/A	0			23332011	#N/A	0			23332011	#N/A	0			23332011	#N/A	0			23332011
2333	2013	23332013	安徽省	安徽	安徽2013	0.693147	0.0172233	黄鹏	23332013黄鹏	独立董事	1		潘家柱	23332013潘家柱	独立董事	1	0	钱芳	23332013钱芳	董事,总经理	0			23332013	#N/A	0			23332013	#N/A	0			23332013	#N/A	0			23332013	#N/A	0			23332013	#N/A	0			23332013
2333	2016	23332016	安徽省	安徽	安徽2016	3.2581	0.0221311	张雪芬	23332016张雪芬	独立董事	1		黄鹏	23332016黄鹏	独立董事	1	0	钱芳	23332016钱芳	董事,总经理	0			23332016	#N/A	0			23332016	#N/A	0			23332016	#N/A	0			23332016	#N/A	0			23332016	#N/A	0			23332016
2333	2017	23332017	安徽省	安徽	安徽2017	3.43399	0.0173611	张雪芬	23332017张雪芬	独立董事	1		黄鹏	23332017黄鹏	独立董事	1	0	钱芳	23332017钱芳	董事,总经理	0			23332017	#N/A	0			23332017	#N/A	0			23332017	#N/A	0			23332017	#N/A	0			23332017	#N/A	0			23332017
2333	2020	23332020	安徽省	安徽	安徽2020	4.69135	0.011744	权小锋	23332020权小锋	独立董事	1		黄鹏	23332020黄鹏	独立董事	1	0	钱芳	23332020钱芳	董事	0			23332020	#N/A	0			23332020	#N/A	0			23332020	#N/A	0			23332020	#N/A	0			23332020	#N/A	0			23332020
2334	2016	23342016	安徽省	安徽	安徽2016	3.2581	0.0221311	董秀琴	23342016董秀琴	独立董事	1		秦飞	23342016秦飞	独立董事	1	1	郑亚明	23342016郑亚明	董事,副总经理	0			23342016	#N/A	0			23342016	#N/A	0			23342016	#N/A	0			23342016	#N/A	0			23342016	#N/A	0			23342016
2334	2019	23342019	安徽省	安徽	安徽2019	3.4012	0.0163229	董秀琴	23342019董秀琴	独立董事	1		何志聪	23342019何志聪	独立董事	1	0	郑亚明	23342019郑亚明	董事	0			23342019	#N/A	0			23342019	#N/A	0			23342019	#N/A	0			23342019	#N/A	0			23342019	#N/A	0			23342019
2335	2011	23352011	安徽省	安徽	安徽2011	0.693147	0.0177839	汤金木	23352011汤金木	独立董事	1		吴建文	23352011吴建文	副董事长,副总裁	0		陈善昂	23352011陈善昂	独立董事	1	0		23352011	#N/A	0			23352011	#N/A	0			23352011	#N/A	0			23352011	#N/A	0			23352011	#N/A	0			23352011
2335	2016	23352016	安徽省	安徽	安徽2016	3.2581	0.0221311	肖虹	23352016肖虹	独立董事	1	1	林仪	23352016林仪	副董事长,副总裁	0		刘志云	23352016刘志云	独立董事	1	0		23352016	#N/A	0			23352016	#N/A	0			23352016	#N/A	0			23352016	#N/A	0			23352016	#N/A	0			23352016
2335	2019	23352019	安徽省	安徽	安徽2019	3.4012	0.0163229	肖虹	23352019肖虹	独立董事	1	1	林仪	23352019林仪	副董事长,副总裁	0		刘志云	23352019刘志云	独立董事	1	0		23352019	#N/A	0			23352019	#N/A	0			23352019	#N/A	0			23352019	#N/A	0			23352019	#N/A	0			23352019
2336	2010	23362010	广东省	广东	广东2010	#N/A	0.0216352	义志强	23362010义志强	独立董事	1		刘鲁鱼	23362010刘鲁鱼	独立董事	1	0	蔡慧明	23362010蔡慧明	董事,副总裁,首席财务官	0			23362010	#N/A	0			23362010	#N/A	0			23362010	#N/A	0			23362010	#N/A	0			23362010	#N/A	0			23362010
2336	2017	23362017	广东省	广东	广东2017	2.70805	0.0163228	卜功桃	23362017卜功桃	独立董事	1		花涛	23362017花涛	独立董事	1	0	何浩	23362017何浩	董事,执行总裁,首席营运官	0			23362017	#N/A	0			23362017	#N/A	0			23362017	#N/A	0			23362017	#N/A	0			23362017	#N/A	0			23362017
2336	2023	23362023	广东省	广东	广东2023	9.88283	#N/A	侯延奎	23362023侯延奎	董事长,非独立董事,副总裁	1		张宝柱	23362023张宝柱	独立董事	1	0	余忠慧	23362023余忠慧	独立董事	1	0		23362023	#N/A	0			23362023	#N/A	0			23362023	#N/A	0			23362023	#N/A	0			23362023	#N/A	0			23362023
2337	2017	23372017	广东省	广东	广东2017	2.70805	0.0163228	张梅	23372017张梅	独立董事	1		张梅	23372017张梅	独立董事	1	0	郭卫锋	23372017郭卫锋	独立董事	1	0	韩子森	23372017韩子森	非独立董事,常务副总经理	0			23372017	#N/A	0			23372017	#N/A	0			23372017	#N/A	0			23372017	#N/A	0			23372017
2338	2012	23382012	广东省	广东	广东2012	0.693147	0.0230561	杜婕	23382012杜婕	独立董事	1		宋志义	23382012宋志义	董事	0		姜会林	23382012姜会林	独立董事	1	0		23382012	#N/A	0			23382012	#N/A	0			23382012	#N/A	0			23382012	#N/A	0			23382012	#N/A	0			23382012
2338	2014	23382014	广东省	广东	广东2014	#N/A	0.0224623	朱文山	23382014朱文山	独立董事	1		宋志义	23382014宋志义	董事	0		孙洪波	23382014孙洪波	独立董事	1	0		23382014	#N/A	0			23382014	#N/A	0			23382014	#N/A	0			23382014	#N/A	0			23382014	#N/A	0			23382014
2338	2017	23382017	广东省	广东	广东2017	2.70805	0.0163228	朱文山	23382017朱文山	独立董事	1		宋志义	23382017宋志义	董事	0		李北伟	23382017李北伟	独立董事	1	0		23382017	#N/A	0			23382017	#N/A	0			23382017	#N/A	0			23382017	#N/A	0			23382017	#N/A	0			23382017
2338	2018	23382018	广东省	广东	广东2018	2.56495	0.0175543	朱文山	23382018朱文山	独立董事	1		宋志义	23382018宋志义	董事	0		李北伟	23382018李北伟	独立董事	1	0		23382018	#N/A	0			23382018	#N/A	0			23382018	#N/A	0			23382018	#N/A	0			23382018	#N/A	0			23382018
2339	2015	23392015	广东省	广东	广东2015	0.693147	0.0185536	王琨	23392015王琨	独立董事	1		熊伟	23392015熊伟	独立董事	1	0	冯东	23392015冯东	董事,副总经理	0			23392015	#N/A	0			23392015	#N/A	0			23392015	#N/A	0			23392015	#N/A	0			23392015	#N/A	0			23392015
2339	2019	23392019	广东省	广东	广东2019	2.77259	0.0140111	王琨	23392019王琨	独立董事	1		熊伟	23392019熊伟	独立董事	1	0	冯东	23392019冯东	董事,副总经理	0			23392019	#N/A	0			23392019	#N/A	0			23392019	#N/A	0			23392019	#N/A	0			23392019	#N/A	0			23392019
2339	2020	23392020	广东省	广东	广东2020	2.83321	0.0174561	陈关亭	23392020陈关亭	独立董事	1		翟继光	23392020翟继光	独立董事	1	0	李文峰	23392020李文峰	董事,副总经理	0			23392020	#N/A	0			23392020	#N/A	0			23392020	#N/A	0			23392020	#N/A	0			23392020	#N/A	0			23392020
2339	2022	23392022	广东省	广东	广东2022	9.96857	0.0155058	陈关亭	23392022陈关亭	独立董事	1		翟继光	23392022翟继光	独立董事	1	0	李文峰	23392022李文峰	董事,副总经理	0			23392022	#N/A	0			23392022	#N/A	0			23392022	#N/A	0			23392022	#N/A	0			23392022	#N/A	0			23392022
2340	2023	23402023	广东省	广东	广东2023	9.88283	#N/A	刘中华	23402023刘中华	独立董事	1		潘峰	23402023潘峰	独立董事	1	0	王敏	23402023王敏	董事	0			23402023	#N/A	0			23402023	#N/A	0			23402023	#N/A	0			23402023	#N/A	0			23402023	#N/A	0			23402023
2342	2019	23422019	河北省	河北	河北2019	4.48864	0.0238288	刘德雷	23422019刘德雷	独立董事	1		杨建忠	23422019杨建忠	董事长	0		李彦英	23422019李彦英	副总裁,董事	0		田洪	23422019田洪	独立董事	1	0	董国云	23422019董国云	独立董事	1	0		23422019	#N/A	0			23422019	#N/A	0			23422019	#N/A	0			23422019
2346	2015	23462015	浙江省	浙江	浙江2015	0.693147	0.022429	赵德强	23462015赵德强	独立董事	1		徐根生	23462015徐根生	独立董事	1	0	仰欢贤	23462015仰欢贤	董事	0			23462015	#N/A	0			23462015	#N/A	0			23462015	#N/A	0			23462015	#N/A	0			23462015	#N/A	0			23462015
2346	2016	23462016	浙江省	浙江	浙江2016	1.09861	0.026311	赵德强	23462016赵德强	独立董事	1		徐根生	23462016徐根生	独立董事	1	0	仰欢贤	23462016仰欢贤	董事	0			23462016	#N/A	0			23462016	#N/A	0			23462016	#N/A	0			23462016	#N/A	0			23462016	#N/A	0			23462016
2346	2017	23462017	浙江省	浙江	浙江2017	1.09861	0.0181469	赵德强	23462017赵德强	#N/A	0		徐根生	23462017徐根生	#N/A	0		仰欢贤	23462017仰欢贤	#N/A	0			23462017	#N/A	0			23462017	#N/A	0			23462017	#N/A	0			23462017	#N/A	0			23462017	#N/A	0			23462017
2346	2018	23462018	浙江省	浙江	浙江2018	1.79176	0.0193728	赵德强	23462018赵德强	#N/A	0		徐根生	23462018徐根生	#N/A	0		仰欢贤	23462018仰欢贤	#N/A	0			23462018	#N/A	0			23462018	#N/A	0			23462018	#N/A	0			23462018	#N/A	0			23462018	#N/A	0			23462018
2346	2019	23462019	浙江省	浙江	浙江2019	4.81218	0.0120027	赵德强	23462019赵德强	#N/A	0		徐根生	23462019徐根生	#N/A	0		仰欢贤	23462019仰欢贤	#N/A	0			23462019	#N/A	0			23462019	#N/A	0			23462019	#N/A	0			23462019	#N/A	0			23462019	#N/A	0			23462019
2347	2014	23472014	浙江省	浙江	浙江2014	#N/A	0.0278689	黄春燕	23472014黄春燕	董事	0		王跃堂	23472014王跃堂	独立董事	1	0	朱昌逑	23472014朱昌逑	独立董事	1	0		23472014	#N/A	0			23472014	#N/A	0			23472014	#N/A	0			23472014	#N/A	0			23472014	#N/A	0			23472014
2347	2017	23472017	浙江省	浙江	浙江2017	1.09861	0.0181469	张居忠	23472017张居忠	独立董事	1		杨晓明	23472017杨晓明	职工董事,董事会秘书	0		方明	23472017方明	独立董事	1	0		23472017	#N/A	0			23472017	#N/A	0			23472017	#N/A	0			23472017	#N/A	0			23472017	#N/A	0			23472017
2347	2018	23472018	浙江省	浙江	浙江2018	1.79176	0.0193728	张居忠	23472018张居忠	独立董事	1		杨晓明	23472018杨晓明	职工董事,董事会秘书	0		方明	23472018方明	独立董事	1	0		23472018	#N/A	0			23472018	#N/A	0			23472018	#N/A	0			23472018	#N/A	0			23472018	#N/A	0			23472018
2347	2019	23472019	浙江省	浙江	浙江2019	4.81218	0.0120027	张居忠	23472019张居忠	独立董事	1		杨晓明	23472019杨晓明	职工董事,董事会秘书	0		方明	23472019方明	独立董事	1	0		23472019	#N/A	0			23472019	#N/A	0			23472019	#N/A	0			23472019	#N/A	0			23472019	#N/A	0			23472019
2347	2020	23472020	浙江省	浙江	浙江2020	4.26268	0.0131053	张居忠	23472020张居忠	独立董事	1		方明	23472020方明	独立董事	1	0	杨晓明	23472020杨晓明	职工董事,财务总监	0			23472020	#N/A	0			23472020	#N/A	0			23472020	#N/A	0			23472020	#N/A	0			23472020	#N/A	0			23472020
2349	2022	23492022	广东省	广东	广东2022	9.96857	0.0155058	冯巧根	23492022冯巧根	独立董事	1		王煦	23492022王煦	独立董事	1	0	尹红宇	23492022尹红宇	董事长	0			23492022	#N/A	0			23492022	#N/A	0			23492022	#N/A	0			23492022	#N/A	0			23492022	#N/A	0			23492022
2351	2013	23512013	广东省	广东	广东2013	#N/A	0.0237707	周立业	23512013周立业	独立董事	1		杨亚利	23512013杨亚利	独立董事	1	0	王晓红	23512013王晓红	董事	0			23512013	#N/A	0			23512013	#N/A	0			23512013	#N/A	0			23512013	#N/A	0			23512013	#N/A	0			23512013
2352	2010	23522010	广东省	广东	广东2010	#N/A	0.0216352		23522010	#N/A	0			23522010	#N/A	0			23522010	#N/A	0			23522010	#N/A	0			23522010	#N/A	0			23522010	#N/A	0			23522010	#N/A	0			23522010	#N/A	0			23522010
2352	2011	23522011	广东省	广东	广东2011	#N/A	0.0199093	戴新民	23522011戴新民	独立董事	1		胡卫红	23522011胡卫红	董事	0		方伦赞	23522011方伦赞	独立董事	1	0		23522011	#N/A	0			23522011	#N/A	0			23522011	#N/A	0			23522011	#N/A	0			23522011	#N/A	0			23522011
2352	2018	23522018	广东省	广东	广东2018	2.56495	0.0175543	周忠惠	23522018周忠惠	独立董事	1		金李	23522018金李	独立董事	1	0	伍玮婷	23522018伍玮婷	董事,副总经理,财务负责人	0			23522018	#N/A	0			23522018	#N/A	0			23522018	#N/A	0			23522018	#N/A	0			23522018	#N/A	0			23522018
2352	2023	23522023	广东省	广东	广东2023	9.88283	#N/A	陈尚伟	23522023陈尚伟	独立董事	1		李嘉士	23522023李嘉士	独立董事	1	0	丁益	23522023丁益	独立董事	1	0		23522023	#N/A	0			23522023	#N/A	0			23522023	#N/A	0			23522023	#N/A	0			23522023	#N/A	0			23522023
2353	2010	23532010	山东省	山东	山东2010	#N/A	0.0142992	梁美健	23532010梁美健	独立董事	1		王建国	23532010王建国	独立董事	1	0	刘贞峰	23532010刘贞峰	董事	0			23532010	#N/A	0			23532010	#N/A	0			23532010	#N/A	0			23532010	#N/A	0			23532010	#N/A	0			23532010
2353	2015	23532015	山东省	山东	山东2015	4.15888	0.0157355	于希茂	23532015于希茂	独立董事	1		姚秀云	23532015姚秀云	独立董事	1	0	李雪峰	23532015李雪峰	非独立董事,财务总监	0			23532015	#N/A	0			23532015	#N/A	0			23532015	#N/A	0			23532015	#N/A	0			23532015	#N/A	0			23532015
2353	2021	23532021	山东省	山东	山东2021	9.50956	0.0155433	王欣兰	23532021王欣兰	独立董事	1		张晓晓	23532021张晓晓	独立董事	1	0	张志刚	23532021张志刚	非独立董事,副总经理,董事会秘书	0			23532021	#N/A	0			23532021	#N/A	0			23532021	#N/A	0			23532021	#N/A	0			23532021	#N/A	0			23532021
2354	2012	23542012	山东省	山东	山东2012	0.693147	0.0142408	田世忠	23542012田世忠	独立董事	1		申士杰	23542012申士杰	独立董事	1	0	林树勇	23542012林树勇	董事,副总经理	0			23542012	#N/A	0			23542012	#N/A	0			23542012	#N/A	0			23542012	#N/A	0			23542012	#N/A	0			23542012
2354	2023	23542023	山东省	山东	山东2023	9.13669	#N/A	黄晓亮	23542023黄晓亮	独立董事	1		赵昭	23542023赵昭	董事	0		刘红霞	23542023刘红霞	独立董事	1	0		23542023	#N/A	0			23542023	#N/A	0			23542023	#N/A	0			23542023	#N/A	0			23542023	#N/A	0			23542023
2355	2010	23552010	山东省	山东	山东2010	#N/A	0.0142992		23552010	#N/A	0			23552010	#N/A	0			23552010	#N/A	0			23552010	#N/A	0			23552010	#N/A	0			23552010	#N/A	0			23552010	#N/A	0			23552010	#N/A	0			23552010
2356	2016	23562016	山东省	山东	山东2016	#N/A	0.0178275	苏武俊	23562016苏武俊	独立董事	1		王新安	23562016王新安	独立董事	1	0		23562016	#N/A	0			23562016	#N/A	0			23562016	#N/A	0			23562016	#N/A	0			23562016	#N/A	0			23562016	#N/A	0			23562016
2356	2017	23562017	山东省	山东	山东2017	2.07944	0.0146452	葛勇	23562017葛勇	独立董事	1		王新安	23562017王新安	独立董事	1	0	刘睿	23562017刘睿	董事,副总经理	0			23562017	#N/A	0			23562017	#N/A	0			23562017	#N/A	0			23562017	#N/A	0			23562017	#N/A	0			23562017
2357	2018	23572018	山东省	山东	山东2018	2.3979	0.0165044	赵洪功	23572018赵洪功	独立董事	1	1	李正国	23572018李正国	独立董事	1	0	曹洪	23572018曹洪	董事,董事会秘书,副总经理	0			23572018	#N/A	0			23572018	#N/A	0			23572018	#N/A	0			23572018	#N/A	0			23572018	#N/A	0			23572018
2359	2020	23592020	河南省	河南	河南2020	5.15329	0.020523		23592020	#N/A	0		李维华	23592020李维华	非独立董事	0		杨涛	23592020杨涛	#N/A	0			23592020	#N/A	0			23592020	#N/A	0			23592020	#N/A	0			23592020	#N/A	0			23592020	#N/A	0			23592020
2360	2017	23602017	河南省	河南	河南2017	3.4012	0.0197107	李玉敏	23602017李玉敏	独立董事	1		张云升	23602017张云升	董事长	0		张晓东	23602017张晓东	独立董事	1	0		23602017	#N/A	0			23602017	#N/A	0			23602017	#N/A	0			23602017	#N/A	0			23602017	#N/A	0			23602017
2360	2021	23602021	河南省	河南	河南2021	9.2196	0.0199731	杨瑞平	23602021杨瑞平	独立董事	1		张烘	23602021张烘	副董事长,副总经理	0		王军	23602021王军	独立董事	1	0		23602021	#N/A	0			23602021	#N/A	0			23602021	#N/A	0			23602021	#N/A	0			23602021	#N/A	0			23602021
2361	2015	23612015	河南省	河南	河南2015	3.3322	0.016777	路国平	23612015路国平	独立董事	1		刘绍宏	23612015刘绍宏	董事,副总经理	0		万尚庆	23612015万尚庆	独立董事	1	0		23612015	#N/A	0			23612015	#N/A	0			23612015	#N/A	0			23612015	#N/A	0			23612015	#N/A	0			23612015
2361	2016	23612016	河南省	河南	河南2016	3.29584	0.0152979	路国平	23612016路国平	独立董事	1		刘绍宏	23612016刘绍宏	董事,副总经理	0		万尚庆	23612016万尚庆	独立董事	1	0		23612016	#N/A	0			23612016	#N/A	0			23612016	#N/A	0			23612016	#N/A	0			23612016	#N/A	0			23612016
2362	2013	23622013	河南省	河南	河南2013	1.79176	0.0150365	姚刚	23622013姚刚	独立董事,总经理,董事	1		张利国	23622013张利国	独立董事	1	0	张学军	23622013张学军	董事,总经理	0			23622013	#N/A	0			23622013	#N/A	0			23622013	#N/A	0			23622013	#N/A	0			23622013	#N/A	0			23622013
2362	2014	23622014	河南省	河南	河南2014	2.3979	0.0182527	鲁桂华	23622014鲁桂华	独立董事	1		张利国	23622014张利国	独立董事	1	0	姚刚	23622014姚刚	董事,总经理	0			23622014	#N/A	0			23622014	#N/A	0			23622014	#N/A	0			23622014	#N/A	0			23622014	#N/A	0			23622014
2362	2015	23622015	河南省	河南	河南2015	3.3322	0.016777	鲁桂华	23622015鲁桂华	独立董事	1		张利国	23622015张利国	独立董事	1	0	朱德永	23622015朱德永	副董事长,副总经理,董事会秘书	0			23622015	#N/A	0			23622015	#N/A	0			23622015	#N/A	0			23622015	#N/A	0			23622015	#N/A	0			23622015
2362	2016	23622016	河南省	河南	河南2016	3.29584	0.0152979	鲁桂华	23622016鲁桂华	独立董事	1		张利国	23622016张利国	独立董事	1	0	朱德永	23622016朱德永	副董事长,副总经理,董事会秘书	0			23622016	#N/A	0			23622016	#N/A	0			23622016	#N/A	0			23622016	#N/A	0			23622016	#N/A	0			23622016
2363	2023	23632023	河南省	河南	河南2023	8.96814	#N/A	孙德坤	23632023孙德坤	独立董事	1		王德生	23632023王德生	董事,副总经理	0		徐志刚	23632023徐志刚	独立董事	1	0		23632023	#N/A	0			23632023	#N/A	0			23632023	#N/A	0			23632023	#N/A	0			23632023	#N/A	0			23632023
2364	2015	23642015	河南省	河南	河南2015	3.3322	0.016777	吴晖	23642015吴晖	独立董事	1		熊兰英	23642015熊兰英	独立董事	1	1	易开刚	23642015易开刚	独立董事	1	0		23642015	#N/A	0			23642015	#N/A	0			23642015	#N/A	0			23642015	#N/A	0			23642015	#N/A	0			23642015
2364	2019	23642019	河南省	河南	河南2019	4.89784	0.0185283	吴晖	23642019吴晖	独立董事	1	1	熊兰英	23642019熊兰英	独立董事	1	0	张建华	23642019张建华	独立董事	1	0		23642019	#N/A	0			23642019	#N/A	0			23642019	#N/A	0			23642019	#N/A	0			23642019	#N/A	0			23642019
2364	2020	23642020	河南省	河南	河南2020	5.15329	0.020523	裘益政	23642020裘益政	独立董事	1		薛静	23642020薛静	独立董事	1	0	袁樵	23642020袁樵	独立董事	1	1		23642020	#N/A	0			23642020	#N/A	0			23642020	#N/A	0			23642020	#N/A	0			23642020	#N/A	0			23642020
2364	2022	23642022	河南省	河南	河南2022	9.05439	0.0131279	裘益政	23642022裘益政	独立董事	1		薛静	23642022薛静	独立董事	1	0	袁樵	23642022袁樵	独立董事	1	0		23642022	#N/A	0			23642022	#N/A	0			23642022	#N/A	0			23642022	#N/A	0			23642022	#N/A	0			23642022
2365	2014	23652014	河南省	河南	河南2014	2.3979	0.0182527	王永海	23652014王永海	独立董事	1		方全丰	23652014方全丰	独立董事	1	0	张瑰	23652014张瑰	董事,副总经理	0			23652014	#N/A	0			23652014	#N/A	0			23652014	#N/A	0			23652014	#N/A	0			23652014	#N/A	0			23652014
2365	2017	23652017	河南省	河南	河南2017	3.4012	0.0197107	王永海	23652017王永海	独立董事	1		王大宏	23652017王大宏	独立董事	1	0	陈勇	23652017陈勇	董事长	0			23652017	#N/A	0			23652017	#N/A	0			23652017	#N/A	0			23652017	#N/A	0			23652017	#N/A	0			23652017
2365	2018	23652018	河南省	河南	河南2018	4.46591	0.0189316	陈勇	23652018陈勇	董事长	0		刘启亮	23652018刘启亮	独立董事	1	0	王大宏	23652018王大宏	独立董事	1	0		23652018	#N/A	0			23652018	#N/A	0			23652018	#N/A	0			23652018	#N/A	0			23652018	#N/A	0			23652018
2365	2019	23652019	河南省	河南	河南2019	4.89784	0.0185283	陈勇	23652019陈勇	董事长	0		刘启亮	23652019刘启亮	独立董事	1	0	王大宏	23652019王大宏	独立董事	1	0		23652019	#N/A	0			23652019	#N/A	0			23652019	#N/A	0			23652019	#N/A	0			23652019	#N/A	0			23652019
2365	2020	23652020	河南省	河南	河南2020	5.15329	0.020523	陈勇	23652020陈勇	董事长	0		刘启亮	23652020刘启亮	独立董事	1	0	王大宏	23652020王大宏	独立董事	1	0		23652020	#N/A	0			23652020	#N/A	0			23652020	#N/A	0			23652020	#N/A	0			23652020	#N/A	0			23652020
2368	2013	23682013	北京市	北京	北京2013	#N/A	0.0228363	赵合宇	23682013赵合宇	独立董事	1		刘凯湘	23682013刘凯湘	独立董事	1	0	刘晓薇	23682013刘晓薇	董事,高级副总裁	0			23682013	#N/A	0			23682013	#N/A	0			23682013	#N/A	0			23682013	#N/A	0			23682013	#N/A	0			23682013
2368	2014	23682014	北京市	北京	北京2014	#N/A	0.0259314	赵合宇	23682014赵合宇	独立董事	1		刘凯湘	23682014刘凯湘	独立董事	1	0	刘晓薇	23682014刘晓薇	董事,高级副总裁	0			23682014	#N/A	0			23682014	#N/A	0			23682014	#N/A	0			23682014	#N/A	0			23682014	#N/A	0			23682014
2368	2015	23682015	北京市	北京	北京2015	0.693147	0.0241708	赵合宇	23682015赵合宇	独立董事	1		刘凯湘	23682015刘凯湘	独立董事	1	0	刘晓薇	23682015刘晓薇	董事,高级副总裁	0			23682015	#N/A	0			23682015	#N/A	0			23682015	#N/A	0			23682015	#N/A	0			23682015	#N/A	0			23682015
2368	2016	23682016	北京市	北京	北京2016	1.09861	0.0311098	赵合宇	23682016赵合宇	独立董事	1		刘凯湘	23682016刘凯湘	独立董事	1	0	刘晓薇	23682016刘晓薇	董事,高级副总裁	0			23682016	#N/A	0			23682016	#N/A	0			23682016	#N/A	0			23682016	#N/A	0			23682016	#N/A	0			23682016
2368	2017	23682017	北京市	北京	北京2017	#N/A	0.0270469	赵合宇	23682017赵合宇	独立董事	1		王钧	23682017王钧	独立董事	1	0	邵辉	23682017邵辉	非独立董事	0			23682017	#N/A	0			23682017	#N/A	0			23682017	#N/A	0			23682017	#N/A	0			23682017	#N/A	0			23682017
2368	2018	23682018	北京市	北京	北京2018	1.79176	0.028059	赵合宇	23682018赵合宇	独立董事	1		王钧	23682018王钧	独立董事	1	0	邵辉	23682018邵辉	非独立董事	0			23682018	#N/A	0			23682018	#N/A	0			23682018	#N/A	0			23682018	#N/A	0			23682018	#N/A	0			23682018
2368	2019	23682019	北京市	北京	北京2019	1.38629	0.0248181	赵合宇	23682019赵合宇	独立董事	1		王钧	23682019王钧	独立董事	1	0	邵辉	23682019邵辉	非独立董事	0			23682019	#N/A	0			23682019	#N/A	0			23682019	#N/A	0			23682019	#N/A	0			23682019	#N/A	0			23682019
2368	2022	23682022	北京市	北京	北京2022	7.92588	0.0163973	赵合宇	23682022赵合宇	独立董事	1		王钧	23682022王钧	独立董事	1	0	邵辉	23682022邵辉	非独立董事	0			23682022	#N/A	0			23682022	#N/A	0			23682022	#N/A	0			23682022	#N/A	0			23682022	#N/A	0			23682022
2370	2020	23702020	广东省	广东	广东2020	2.83321	0.0174561	莫国萍	23702020莫国萍	独立董事	1		何大安	23702020何大安	独立董事	1	0	任军	23702020任军	董事	0			23702020	#N/A	0			23702020	#N/A	0			23702020	#N/A	0			23702020	#N/A	0			23702020	#N/A	0			23702020
2371	2015	23712015	北京市	北京	北京2015	0.693147	0.0241708	邹志文	23712015邹志文	独立董事	1	1	徐扬	23712015徐扬	独立董事	1	0	叶晨清	23712015叶晨清	董事	0			23712015	#N/A	0			23712015	#N/A	0			23712015	#N/A	0			23712015	#N/A	0			23712015	#N/A	0			23712015
2371	2016	23712016	北京市	北京	北京2016	1.09861	0.0311098	邹志文	23712016邹志文	独立董事	1	1	徐扬	23712016徐扬	独立董事	1	0	张建辉	23712016张建辉	董事	0			23712016	#N/A	0			23712016	#N/A	0			23712016	#N/A	0			23712016	#N/A	0			23712016	#N/A	0			23712016
2372	2017	23722017	浙江省	浙江	浙江2017	1.09861	0.0181469	王陆冬	23722017王陆冬	独立董事	1		章击舟	23722017章击舟	独立董事	1	1	谢瑾琨	23722017谢瑾琨	董事	0			23722017	#N/A	0			23722017	#N/A	0			23722017	#N/A	0			23722017	#N/A	0			23722017	#N/A	0			23722017
2372	2019	23722019	浙江省	浙江	浙江2019	4.81218	0.0120027	王陆冬	23722019王陆冬	独立董事	1		章击舟	23722019章击舟	独立董事	1	1	谢瑾琨	23722019谢瑾琨	董事	0			23722019	#N/A	0			23722019	#N/A	0			23722019	#N/A	0			23722019	#N/A	0			23722019	#N/A	0			23722019
2372	2023	23722023	浙江省	浙江	浙江2023	9.74326	#N/A	郑丽君	23722023郑丽君	独立董事	1		祝卸和	23722023祝卸和	独立董事	1	0	冯济府	23722023冯济府	董事	0			23722023	#N/A	0			23722023	#N/A	0			23722023	#N/A	0			23722023	#N/A	0			23722023	#N/A	0			23722023
2373	2015	23732015	北京市	北京	北京2015	0.693147	0.0241708	刘霄仑	23732015刘霄仑	独立董事	1		慕丽娜	23732015慕丽娜	独立董事	1	0	HE NING	23732015HE NING	独立董事	1	0		23732015	#N/A	0			23732015	#N/A	0			23732015	#N/A	0			23732015	#N/A	0			23732015	#N/A	0			23732015
2373	2016	23732016	北京市	北京	北京2016	1.09861	0.0311098	刘霄仑	23732016刘霄仑	独立董事	1		慕丽娜	23732016慕丽娜	独立董事	1	0	HE NING	23732016HE NING	独立董事	1	0		23732016	#N/A	0			23732016	#N/A	0			23732016	#N/A	0			23732016	#N/A	0			23732016	#N/A	0			23732016
2373	2017	23732017	北京市	北京	北京2017	#N/A	0.0270469	刘霄仑	23732017刘霄仑	独立董事	1		慕丽娜	23732017慕丽娜	独立董事	1	0	HE NING	23732017HE NING	独立董事	1	0		23732017	#N/A	0			23732017	#N/A	0			23732017	#N/A	0			23732017	#N/A	0			23732017	#N/A	0			23732017
2373	2022	23732022	北京市	北京	北京2022	7.92588	0.0163973	黄峰	23732022黄峰	独立董事	1		陈荣根	23732022陈荣根	独立董事	1	0	杨栋锐	23732022杨栋锐	独立董事	1	0		23732022	#N/A	0			23732022	#N/A	0			23732022	#N/A	0			23732022	#N/A	0			23732022	#N/A	0			23732022
2376	2010	23762010	浙江省	浙江	浙江2010	#N/A	0.0187642		23762010	#N/A	0			23762010	#N/A	0			23762010	#N/A	0			23762010	#N/A	0			23762010	#N/A	0			23762010	#N/A	0			23762010	#N/A	0			23762010	#N/A	0			23762010
2376	2023	23762023	浙江省	浙江	浙江2023	9.74326	#N/A	季振洲	23762023季振洲	独立董事	1		姜爱丽	23762023姜爱丽	独立董事	1	0	曲国霞	23762023曲国霞	独立董事	1	0		23762023	#N/A	0			23762023	#N/A	0			23762023	#N/A	0			23762023	#N/A	0			23762023	#N/A	0			23762023
2378	2017	23782017	江西省	江西	江西2017	0.693147	0.0235461	张洪发	23782017张洪发	独立董事	1		王平	23782017王平	董事,独立董事	1	0	王安建	23782017王安建	独立董事	1	1		23782017	#N/A	0			23782017	#N/A	0			23782017	#N/A	0			23782017	#N/A	0			23782017	#N/A	0			23782017
2378	2023	23782023	江西省	江西	江西2023	9.23034	#N/A	王京彬	23782023王京彬	独立董事	1		王平	23782023王平	独立董事	1	1	韩复龄	23782023韩复龄	独立董事	1	0	潘峰	23782023潘峰	非独立董事	0			23782023	#N/A	0			23782023	#N/A	0			23782023	#N/A	0			23782023	#N/A	0			23782023
2379	2016	23792016	江西省	江西	江西2016	#N/A	0.0204209	朱德胜	23792016朱德胜	独立董事	1		王景坤	23792016王景坤	董事长	0		范炼	23792016范炼	独立董事	1	0		23792016	#N/A	0			23792016	#N/A	0			23792016	#N/A	0			23792016	#N/A	0			23792016	#N/A	0			23792016
2379	2023	23792023	江西省	江西	江西2023	9.23034	#N/A	胡毅	23792023胡毅	独立董事	1		刘剑文	23792023刘剑文	独立董事	1	0	孙楠	23792023孙楠	独立董事	1	0		23792023	#N/A	0			23792023	#N/A	0			23792023	#N/A	0			23792023	#N/A	0			23792023	#N/A	0			23792023
2380	2023	23802023	江西省	江西	江西2023	9.23034	#N/A	胡歙眉	23802023胡歙眉	董事,副董事长,总经理	0		王培红	23802023王培红	独立董事	1	1	赵湘莲	23802023赵湘莲	独立董事	1	1		23802023	#N/A	0			23802023	#N/A	0			23802023	#N/A	0			23802023	#N/A	0			23802023	#N/A	0			23802023
2381	2013	23812013	江西省	江西	江西2013	#N/A	0.0284333	陈勇	23812013陈勇	独立董事	1		罗培新	23812013罗培新	独立董事	1	0	虞炳英	23812013虞炳英	副董事长,副总经理	0			23812013	#N/A	0			23812013	#N/A	0			23812013	#N/A	0			23812013	#N/A	0			23812013	#N/A	0			23812013
2381	2023	23812023	江西省	江西	江西2023	9.23034	#N/A	凌忠良	23812023凌忠良	独立董事	1	1	李鸿	23812023李鸿	独立董事	1	0	占响林	23812023占响林	非独立董事	0			23812023	#N/A	0			23812023	#N/A	0			23812023	#N/A	0			23812023	#N/A	0			23812023	#N/A	0			23812023
2383	2012	23832012	山东省	山东	山东2012	0.693147	0.0142408	苏金其	23832012苏金其	独立董事	1		郜卓	23832012郜卓	独立董事	1	0	侯红梅	23832012侯红梅	财务总监,董事,副总经理	0			23832012	#N/A	0			23832012	#N/A	0			23832012	#N/A	0			23832012	#N/A	0			23832012	#N/A	0			23832012
2384	2011	23842011	山东省	山东	山东2011	#N/A	0.0214811	李增泉	23842011李增泉	独立董事	1		王章忠	23842011王章忠	独立董事	1	0	袁永刚	23842011袁永刚	董事长	0			23842011	#N/A	0			23842011	#N/A	0			23842011	#N/A	0			23842011	#N/A	0			23842011	#N/A	0			23842011
2384	2016	23842016	江苏省	江苏	江苏2016	0.693147	0.0231946	罗正英	23842016罗正英	独立董事	1		高永如	23842016高永如	独立董事	1	0	袁永刚	23842016袁永刚	董事长	0			23842016	#N/A	0			23842016	#N/A	0			23842016	#N/A	0			23842016	#N/A	0			23842016	#N/A	0			23842016
2384	2017	23842017	江苏省	江苏	江苏2017	2.48491	0.0210849	罗正英	23842017罗正英	独立董事	1		高永如	23842017高永如	独立董事	1	0	袁永刚	23842017袁永刚	董事长	0			23842017	#N/A	0			23842017	#N/A	0			23842017	#N/A	0			23842017	#N/A	0			23842017	#N/A	0			23842017
2384	2018	23842018	江苏省	江苏	江苏2018	2.56495	0.0202007	罗正英	23842018罗正英	独立董事	1		高永如	23842018高永如	独立董事	1	0	袁永刚	23842018袁永刚	董事长	0			23842018	#N/A	0			23842018	#N/A	0			23842018	#N/A	0			23842018	#N/A	0			23842018	#N/A	0			23842018
2385	2018	23852018	北京市	北京	北京2018	1.79176	0.028059	陈磊	23852018陈磊	独立董事	1		冯玉军	23852018冯玉军	独立董事	1	0	薛素文	23852018薛素文	董事	0			23852018	#N/A	0			23852018	#N/A	0			23852018	#N/A	0			23852018	#N/A	0			23852018	#N/A	0			23852018
2385	2020	23852020	北京市	北京	北京2020	2.3979	0.022133	付文革	23852020付文革	独立董事	1		王立彦	23852020王立彦	独立董事	1	1	周业军	23852020周业军	非独立董事	0			23852020	#N/A	0			23852020	#N/A	0			23852020	#N/A	0			23852020	#N/A	0			23852020	#N/A	0			23852020
2386	2010	23862010	北京市	北京	北京2010	0.693147	0.0194632	肖兴刚	23862010肖兴刚	独立董事	1		罗明辉	23862010罗明辉	董事,总会计师	0		杨鹰彪	23862010杨鹰彪	独立董事	1	0		23862010	#N/A	0			23862010	#N/A	0			23862010	#N/A	0			23862010	#N/A	0			23862010	#N/A	0			23862010
2386	2023	23862023	北京市	北京	北京2023	7.79934	#N/A	潘自强	23862023潘自强	独立董事	1		韩复龄	23862023韩复龄	独立董事	1	0	何波	23862023何波	董事会秘书,非独立董事,副总裁	1	0		23862023	#N/A	0			23862023	#N/A	0			23862023	#N/A	0			23862023	#N/A	0			23862023	#N/A	0			23862023
2387	2018	23872018	广东省	广东	广东2018	2.56495	0.0175543	严杰	23872018严杰	独立董事	1		郑建明	23872018郑建明	独立董事	1	0	王宏岩	23872018王宏岩	董事	0			23872018	#N/A	0			23872018	#N/A	0			23872018	#N/A	0			23872018	#N/A	0			23872018	#N/A	0			23872018
2388	2011	23882011	江苏省	江苏	江苏2011	#N/A	0.0206757	梁志敏	23882011梁志敏	独立董事	1		周少强	23882011周少强	独立董事	1	1	闻明	23882011闻明	董事,副总经理	0			23882011	#N/A	0			23882011	#N/A	0			23882011	#N/A	0			23882011	#N/A	0			23882011	#N/A	0			23882011
2388	2017	23882017	江苏省	江苏	江苏2017	2.48491	0.0210849	卜功桃	23882017卜功桃	独立董事	1		罗红葆	23882017罗红葆	独立董事	1	0	闻明	23882017闻明	董事,副总经理	0			23882017	#N/A	0			23882017	#N/A	0			23882017	#N/A	0			23882017	#N/A	0			23882017	#N/A	0			23882017
2388	2020	23882020	江苏省	江苏	江苏2020	3.17805	0.0181944	麦昊天	23882020麦昊天	独立董事	1	1	王军	23882020王军	独立董事	1	0	胡大富	23882020胡大富	董事,总经理	0			23882020	#N/A	0			23882020	#N/A	0			23882020	#N/A	0			23882020	#N/A	0			23882020	#N/A	0			23882020
2388	2022	23882022	江苏省	江苏	江苏2022	9.38597	0.0208616	麦昊天	23882022麦昊天	独立董事	1	1	王军	23882022王军	#N/A	0		胡大富	23882022胡大富	董事,总经理	0			23882022	#N/A	0			23882022	#N/A	0			23882022	#N/A	0			23882022	#N/A	0			23882022	#N/A	0			23882022
2389	2011	23892011	江苏省	江苏	江苏2011	#N/A	0.0206757		23892011	#N/A	0			23892011	#N/A	0			23892011	#N/A	0			23892011	#N/A	0			23892011	#N/A	0			23892011	#N/A	0			23892011	#N/A	0			23892011	#N/A	0			23892011
2390	2014	23902014	江苏省	江苏	江苏2014	#N/A	0.0247383	孔令忠	23902014孔令忠	董事,常务副总经理,财务总监	0		童朋方	23902014童朋方	独立董事	1	0	张英峰	23902014张英峰	独立董事	1	0		23902014	#N/A	0			23902014	#N/A	0			23902014	#N/A	0			23902014	#N/A	0			23902014	#N/A	0			23902014
2390	2017	23902017	贵州省	贵州	贵州2017	2.83321	0.018858	陈浩	23902017陈浩	独立董事	1		孔令忠	23902017孔令忠	董事,总经理	0		王玲	23902017王玲	独立董事	1	0		23902017	#N/A	0			23902017	#N/A	0			23902017	#N/A	0			23902017	#N/A	0			23902017	#N/A	0			23902017
2391	2020	23912020	贵州省	贵州	贵州2020	1.09861	0.0163507	龚新海	23912020龚新海	独立董事	1		于国权	23912020于国权	董事长	0		孙叔宝	23912020孙叔宝	独立董事	1	0		23912020	#N/A	0			23912020	#N/A	0			23912020	#N/A	0			23912020	#N/A	0			23912020	#N/A	0			23912020
2393	2010	23932010	贵州省	贵州	贵州2010	#N/A	0.0203967	强志源	23932010强志源	独立董事	1		杨威	23932010杨威	独立董事	1	0	赵玉明	23932010赵玉明	董事	0			23932010	#N/A	0			23932010	#N/A	0			23932010	#N/A	0			23932010	#N/A	0			23932010	#N/A	0			23932010
2394	2016	23942016	江苏省	江苏	江苏2016	0.693147	0.0231946	陈丽花	23942016陈丽花	独立董事	1		边永民	23942016边永民	独立董事	1	1	薛庆龙	23942016薛庆龙	董事长	0			23942016	#N/A	0			23942016	#N/A	0			23942016	#N/A	0			23942016	#N/A	0			23942016	#N/A	0			23942016
2394	2017	23942017	江苏省	江苏	江苏2017	2.48491	0.0210849	陈丽花	23942017陈丽花	独立董事	1		边永民	23942017边永民	独立董事	1	1	薛庆龙	23942017薛庆龙	董事长,董事	0			23942017	#N/A	0			23942017	#N/A	0			23942017	#N/A	0			23942017	#N/A	0			23942017	#N/A	0			23942017
2394	2018	23942018	江苏省	江苏	江苏2018	2.56495	0.0202007	陈丽花	23942018陈丽花	独立董事	1		边永民	23942018边永民	独立董事	1	1	薛庆龙	23942018薛庆龙	董事长,董事	0			23942018	#N/A	0			23942018	#N/A	0			23942018	#N/A	0			23942018	#N/A	0			23942018	#N/A	0			23942018
2394	2019	23942019	江苏省	江苏	江苏2019	3.2581	0.0197087	陈丽花	23942019陈丽花	独立董事	1		边永民	23942019边永民	独立董事	1	1	薛庆龙	23942019薛庆龙	董事长,董事	0			23942019	#N/A	0			23942019	#N/A	0			23942019	#N/A	0			23942019	#N/A	0			23942019	#N/A	0			23942019
2395	2014	23952014	江苏省	江苏	江苏2014	#N/A	0.0247383	陈文化	23952014陈文化	独立董事	1		薛济民	23952014薛济民	独立董事	1	1	田为坤	23952014田为坤	董事,常务副总经理	0			23952014	#N/A	0			23952014	#N/A	0			23952014	#N/A	0			23952014	#N/A	0			23952014	#N/A	0			23952014
2395	2015	23952015	江苏省	江苏	江苏2015	#N/A	0.0237915	陈文化	23952015陈文化	独立董事	1		薛济民	23952015薛济民	独立董事	1	1	田为坤	23952015田为坤	董事,常务副总经理	0			23952015	#N/A	0			23952015	#N/A	0			23952015	#N/A	0			23952015	#N/A	0			23952015	#N/A	0			23952015
2395	2016	23952016	江苏省	江苏	江苏2016	0.693147	0.0231946	陈文化	23952016陈文化	独立董事	1		薛济民	23952016薛济民	独立董事	1	1	田为坤	23952016田为坤	董事,常务副总经理	0			23952016	#N/A	0			23952016	#N/A	0			23952016	#N/A	0			23952016	#N/A	0			23952016	#N/A	0			23952016
2395	2017	23952017	江苏省	江苏	江苏2017	2.48491	0.0210849	陈文化	23952017陈文化	独立董事	1		薛济民	23952017薛济民	独立董事	1	1	田为坤	23952017田为坤	董事,常务副总经理	0			23952017	#N/A	0			23952017	#N/A	0			23952017	#N/A	0			23952017	#N/A	0			23952017	#N/A	0			23952017
2395	2018	23952018	江苏省	江苏	江苏2018	2.56495	0.0202007	陈文化	23952018陈文化	独立董事	1		薛济民	23952018薛济民	独立董事	1	1	田为坤	23952018田为坤	董事,常务副总经理	0			23952018	#N/A	0			23952018	#N/A	0			23952018	#N/A	0			23952018	#N/A	0			23952018	#N/A	0			23952018
2395	2020	23952020	江苏省	江苏	江苏2020	3.17805	0.0181944	蔡桂如	23952020蔡桂如	独立董事	1		李郁祥	23952020李郁祥	独立董事	1	0	顾希红	23952020顾希红	董事	0			23952020	#N/A	0			23952020	#N/A	0			23952020	#N/A	0			23952020	#N/A	0			23952020	#N/A	0			23952020
2395	2022	23952022	江苏省	江苏	江苏2022	9.38597	0.0208616	蔡桂如	23952022蔡桂如	独立董事	1	1	李郁祥	23952022李郁祥	独立董事	1	0	顾希红	23952022顾希红	董事长,董事	0			23952022	#N/A	0			23952022	#N/A	0			23952022	#N/A	0			23952022	#N/A	0			23952022	#N/A	0			23952022
2396	2022	23962022	福建省	福建	福建2022	8.42858	0.0129832	夏扬	23962022夏扬	非独立董事	0		保红珊	23962022保红珊	独立董事	1	0	郑维宏	23962022郑维宏	董事,网络研究院院长	0		童建炫	23962022童建炫	独立董事	1	0		23962022	#N/A	0			23962022	#N/A	0			23962022	#N/A	0			23962022	#N/A	0			23962022
2397	2012	23972012	福建省	福建	福建2012	#N/A	0.0174656	陈晓红	23972012陈晓红	独立董事	1		王苏生	23972012王苏生	独立董事	1	0	李军	23972012李军	董事,副总经理,董事会秘书	0		戴钦公	23972012戴钦公	独立董事	1	0		23972012	#N/A	0			23972012	#N/A	0			23972012	#N/A	0			23972012	#N/A	0			23972012
2397	2013	23972013	福建省	福建	福建2013	#N/A	0.0214459	陈共荣	23972013陈共荣	独立董事	1	1	姜天武	23972013姜天武	董事长,总经理	0		戴钦公	23972013戴钦公	独立董事	1	0		23972013	#N/A	0			23972013	#N/A	0			23972013	#N/A	0			23972013	#N/A	0			23972013	#N/A	0			23972013
2397	2015	23972015	福建省	福建	福建2015	1.38629	0.0206139	陈共荣	23972015陈共荣	独立董事	1		姜天武	23972015姜天武	董事长	0			23972015	#N/A	0			23972015	#N/A	0			23972015	#N/A	0			23972015	#N/A	0			23972015	#N/A	0			23972015	#N/A	0			23972015
2397	2016	23972016	福建省	福建	福建2016	#N/A	0.0241498	陈共荣	23972016陈共荣	独立董事	1		姜天武	23972016姜天武	董事长	0		屈茂辉	23972016屈茂辉	独立董事	1	0		23972016	#N/A	0			23972016	#N/A	0			23972016	#N/A	0			23972016	#N/A	0			23972016	#N/A	0			23972016
2397	2017	23972017	福建省	福建	福建2017	1.94591	0.0220731	陈共荣	23972017陈共荣	独立董事	1	1	姜天武	23972017姜天武	董事长	0		屈茂辉	23972017屈茂辉	独立董事	1	0		23972017	#N/A	0			23972017	#N/A	0			23972017	#N/A	0			23972017	#N/A	0			23972017	#N/A	0			23972017
2397	2019	23972019	福建省	福建	福建2019	3.13549	0.0220985	万平	23972019万平	独立董事	1		关健	23972019关健	独立董事	1	1	姜天武	23972019姜天武	董事长	0			23972019	#N/A	0			23972019	#N/A	0			23972019	#N/A	0			23972019	#N/A	0			23972019	#N/A	0			23972019
2398	2013	23982013	福建省	福建	福建2013	#N/A	0.0214459	卢永华	23982013卢永华	独立董事	1		张益河	23982013张益河	独立董事	1	0	麻秀星	23982013麻秀星	董事,常务副总经理	0			23982013	#N/A	0			23982013	#N/A	0			23982013	#N/A	0			23982013	#N/A	0			23982013	#N/A	0			23982013
2400	2012	24002012	广东省	广东	广东2012	0.693147	0.0230561	梁彤缨	24002012梁彤缨	独立董事	1		朱征夫	24002012朱征夫	独立董事	1	0	张磊	24002012张磊	董事	0			24002012	#N/A	0			24002012	#N/A	0			24002012	#N/A	0			24002012	#N/A	0			24002012	#N/A	0			24002012
2400	2013	24002013	广东省	广东	广东2013	#N/A	0.0237707	梁彤缨	24002013梁彤缨	独立董事	1		朱征夫	24002013朱征夫	独立董事	1	0	张磊	24002013张磊	董事,股东代表监事	0			24002013	#N/A	0			24002013	#N/A	0			24002013	#N/A	0			24002013	#N/A	0			24002013	#N/A	0			24002013
2400	2014	24002014	广东省	广东	广东2014	#N/A	0.0224623	万良勇	24002014万良勇	独立董事	1		谢石松	24002014谢石松	独立董事	1	0	陈列波	24002014陈列波	财务总监,非独立董事	1	0		24002014	#N/A	0			24002014	#N/A	0			24002014	#N/A	0			24002014	#N/A	0			24002014	#N/A	0			24002014
2401	2011	24012011	广东省	广东	广东2011	#N/A	0.0199093	张人骥	24012011张人骥	独立董事	1		高勇	24012011高勇	独立董事	1	0	蔡惠星	24012011蔡惠星	董事	0			24012011	#N/A	0			24012011	#N/A	0			24012011	#N/A	0			24012011	#N/A	0			24012011	#N/A	0			24012011
2401	2023	24012023	广东省	广东	广东2023	9.88283	#N/A	张志云	24012023张志云	独立董事	1		李佳铭	24012023李佳铭	独立董事	1	0	李国荣	24012023李国荣	非独立董事	0			24012023	#N/A	0			24012023	#N/A	0			24012023	#N/A	0			24012023	#N/A	0			24012023	#N/A	0			24012023
2402	2017	24022017	广东省	广东	广东2017	2.70805	0.0163228	张坤强	24022017张坤强	独立董事	1		崔军	24022017崔军	独立董事	1	0	路颖	24022017路颖	非独立董事	0			24022017	#N/A	0			24022017	#N/A	0			24022017	#N/A	0			24022017	#N/A	0			24022017	#N/A	0			24022017
2402	2019	24022019	广东省	广东	广东2019	2.77259	0.0140111	张坤强	24022019张坤强	独立董事	1		崔军	24022019崔军	独立董事	1	0	路颖	24022019路颖	非独立董事	0			24022019	#N/A	0			24022019	#N/A	0			24022019	#N/A	0			24022019	#N/A	0			24022019	#N/A	0			24022019
2405	2013	24052013	北京市	北京	北京2013	#N/A	0.0228363	罗玲	24052013罗玲	独立董事	1		崔利国	24052013崔利国	独立董事	1	0		24052013	#N/A	0			24052013	#N/A	0			24052013	#N/A	0			24052013	#N/A	0			24052013	#N/A	0			24052013	#N/A	0			24052013
2407	2012	24072012	北京市	北京	北京2012	#N/A	0.0180667	梁丽娟	24072012梁丽娟	独立董事	1		张大岭	24072012张大岭	独立董事	1	0	李凌云	24072012李凌云	董事,常务副总经理	0			24072012	#N/A	0			24072012	#N/A	0			24072012	#N/A	0			24072012	#N/A	0			24072012	#N/A	0			24072012
2407	2017	24072017	河南省	河南	河南2017	3.4012	0.0197107	罗斌元	24072017罗斌元	独立董事	1		黄国宝	24072017黄国宝	独立董事	1	0	侯红军	24072017侯红军	董事,总经理	0			24072017	#N/A	0			24072017	#N/A	0			24072017	#N/A	0			24072017	#N/A	0			24072017	#N/A	0			24072017
2408	2010	24082010	山东省	山东	山东2010	#N/A	0.0142992	余恕莲	24082010余恕莲	独立董事	1		孙武芝	24082010孙武芝	董事,财务负责人	0		王蕊	24082010王蕊	独立董事	1	0		24082010	#N/A	0			24082010	#N/A	0			24082010	#N/A	0			24082010	#N/A	0			24082010	#N/A	0			24082010
2408	2011	24082011	山东省	山东	山东2011	#N/A	0.0214811	余恕莲	24082011余恕莲	独立董事	1		孙武芝	24082011孙武芝	董事,财务负责人	0		王蕊	24082011王蕊	独立董事	1	0		24082011	#N/A	0			24082011	#N/A	0			24082011	#N/A	0			24082011	#N/A	0			24082011	#N/A	0			24082011
2408	2018	24082018	山东省	山东	山东2018	2.3979	0.0165044	林丹丹	24082018林丹丹	独立董事	1		沈国权	24082018沈国权	独立董事	1	0	刘湖源	24082018刘湖源	董事	0			24082018	#N/A	0			24082018	#N/A	0			24082018	#N/A	0			24082018	#N/A	0			24082018	#N/A	0			24082018
2408	2019	24082019	山东省	山东	山东2019	3.21888	0.0146235	林丹丹	24082019林丹丹	独立董事	1		沈国权	24082019沈国权	独立董事	1	0	刘湖源	24082019刘湖源	董事	0			24082019	#N/A	0			24082019	#N/A	0			24082019	#N/A	0			24082019	#N/A	0			24082019	#N/A	0			24082019
2409	2011	24092011	山东省	山东	山东2011	#N/A	0.0214811	陈良华	24092011陈良华	独立董事	1		陈传明	24092011陈传明	独立董事	1	0	沈馥	24092011沈馥	董事,副总经理	0			24092011	#N/A	0			24092011	#N/A	0			24092011	#N/A	0			24092011	#N/A	0			24092011	#N/A	0			24092011
2409	2014	24092014	山东省	山东	山东2014	3.97029	0.0191943	陈良华	24092014陈良华	独立董事	1		朱和平	24092014朱和平	独立董事	1	0	钱美芳	24092014钱美芳	董事,财务总监,副总经理	0			24092014	#N/A	0			24092014	#N/A	0			24092014	#N/A	0			24092014	#N/A	0			24092014	#N/A	0			24092014
2409	2015	24092015	江苏省	江苏	江苏2015	#N/A	0.0237915	陈良华	24092015陈良华	独立董事	1		朱和平	24092015朱和平	独立董事	1	0	钱美芳	24092015钱美芳	董事,财务总监,副总经理	0			24092015	#N/A	0			24092015	#N/A	0			24092015	#N/A	0			24092015	#N/A	0			24092015	#N/A	0			24092015
2409	2019	24092019	江苏省	江苏	江苏2019	3.2581	0.0197087	沈锡强	24092019沈锡强	董事,副董事长	0		陈强	24092019陈强	独立董事	1	0	朱和平	24092019朱和平	#N/A	0			24092019	#N/A	0			24092019	#N/A	0			24092019	#N/A	0			24092019	#N/A	0			24092019	#N/A	0			24092019
2410	2010	24102010	北京市	北京	北京2010	0.693147	0.0194632		24102010	#N/A	0			24102010	#N/A	0			24102010	#N/A	0			24102010	#N/A	0			24102010	#N/A	0			24102010	#N/A	0			24102010	#N/A	0			24102010	#N/A	0			24102010
2410	2022	24102022	北京市	北京	北京2022	7.92588	0.0163973	郭新平	24102022郭新平	独立董事	1		刁志中	24102022刁志中	董事长	0		马永义	24102022马永义	独立董事	1	0		24102022	#N/A	0			24102022	#N/A	0			24102022	#N/A	0			24102022	#N/A	0			24102022	#N/A	0			24102022
2411	2021	24112021	陕西省	陕西	陕西2021	8.48921	0.0181455	杜杰	24112021杜杰	独立董事	1		谷晓嘉	24112021谷晓嘉	董事长,总裁	0		党长水	24112021党长水	独立董事	1	0		24112021	#N/A	0			24112021	#N/A	0			24112021	#N/A	0			24112021	#N/A	0			24112021	#N/A	0			24112021
2412	2022	24122022	陕西省	陕西	陕西2022	8.42705	0.0189251		24122022	#N/A	0			24122022	#N/A	0			24122022	#N/A	0			24122022	#N/A	0			24122022	#N/A	0			24122022	#N/A	0			24122022	#N/A	0			24122022	#N/A	0			24122022
2412	2023	24122023	陕西省	陕西	陕西2023	8.50127	#N/A	詹萍	24122023詹萍	独立董事	1		夏劲松	24122023夏劲松	独立董事	1	1	刘冰洋	24122023刘冰洋	非独立董事	0			24122023	#N/A	0			24122023	#N/A	0			24122023	#N/A	0			24122023	#N/A	0			24122023	#N/A	0			24122023
2413	2016	24132016	陕西省	陕西	陕西2016	5.58725	0.020808	黄小平	24132016黄小平	董事长,董事	0		居荷凤	24132016居荷凤	独立董事	1	0	黄辉	24132016黄辉	独立董事	1	0		24132016	#N/A	0			24132016	#N/A	0			24132016	#N/A	0			24132016	#N/A	0			24132016	#N/A	0			24132016
2413	2018	24132018	陕西省	陕西	陕西2018	6.60259	0.0192411	戴斌	24132018戴斌	董事长	0		居荷凤	24132018居荷凤	独立董事	1	0	黄辉	24132018黄辉	独立董事	1	0		24132018	#N/A	0			24132018	#N/A	0			24132018	#N/A	0			24132018	#N/A	0			24132018	#N/A	0			24132018
2413	2019	24132019	陕西省	陕西	陕西2019	7.01121	0.0163819	龚国伟	24132019龚国伟	独立董事	1		戴斌	24132019戴斌	董事长	0		黄辉	24132019黄辉	独立董事	1	0		24132019	#N/A	0			24132019	#N/A	0			24132019	#N/A	0			24132019	#N/A	0			24132019	#N/A	0			24132019
2413	2020	24132020	陕西省	陕西	陕西2020	7.48099	0.0175106	龚国伟	24132020龚国伟	独立董事	1		戴斌	24132020戴斌	董事长	0		黄辉	24132020黄辉	独立董事	1	0		24132020	#N/A	0			24132020	#N/A	0			24132020	#N/A	0			24132020	#N/A	0			24132020	#N/A	0			24132020
2414	2010	24142010	陕西省	陕西	陕西2010	0.693147	0.0211651		24142010	#N/A	0			24142010	#N/A	0			24142010	#N/A	0			24142010	#N/A	0			24142010	#N/A	0			24142010	#N/A	0			24142010	#N/A	0			24142010	#N/A	0			24142010
2415	2013	24152013	浙江省	浙江	浙江2013	#N/A	0.0203306	徐文财	24152013徐文财	独立董事	1		程惠芳	24152013程惠芳	独立董事	1	0	陈宗年	24152013陈宗年	董事长	0			24152013	#N/A	0			24152013	#N/A	0			24152013	#N/A	0			24152013	#N/A	0			24152013	#N/A	0			24152013
2415	2014	24152014	浙江省	浙江	浙江2014	#N/A	0.0278689	徐文财	24152014徐文财	独立董事	1		程惠芳	24152014程惠芳	独立董事	1	0	陈宗年	24152014陈宗年	董事长	0			24152014	#N/A	0			24152014	#N/A	0			24152014	#N/A	0			24152014	#N/A	0			24152014	#N/A	0			24152014
2415	2015	24152015	浙江省	浙江	浙江2015	0.693147	0.022429	陆建忠	24152015陆建忠	独立董事	1		程天纵	24152015程天纵	独立董事	1	0	刘翔	24152015刘翔	董事	0			24152015	#N/A	0			24152015	#N/A	0			24152015	#N/A	0			24152015	#N/A	0			24152015	#N/A	0			24152015
2415	2016	24152016	浙江省	浙江	浙江2016	1.09861	0.026311	陆建忠	24152016陆建忠	独立董事	1		程天纵	24152016程天纵	独立董事	1	0	刘翔	24152016刘翔	董事	0			24152016	#N/A	0			24152016	#N/A	0			24152016	#N/A	0			24152016	#N/A	0			24152016	#N/A	0			24152016
2416	2011	24162011	浙江省	浙江	浙江2011	#N/A	0.0219653	林斌	24162011林斌	独立董事	1		叶德磊	24162011叶德磊	独立董事	1	0	夏小华	24162011夏小华	董事,副总裁,财务负责人	0			24162011	#N/A	0			24162011	#N/A	0			24162011	#N/A	0			24162011	#N/A	0			24162011	#N/A	0			24162011
2416	2015	24162015	广东省	广东	广东2015	0.693147	0.0185536	章卫东	24162015章卫东	独立董事	1		吕良彪	24162015吕良彪	独立董事	1	0	夏小华	24162015夏小华	董事,副总裁	0			24162015	#N/A	0			24162015	#N/A	0			24162015	#N/A	0			24162015	#N/A	0			24162015	#N/A	0			24162015
2416	2018	24162018	广东省	广东	广东2018	2.56495	0.0175543	章卫东	24162018章卫东	独立董事	1		喻子达	24162018喻子达	非独立董事	0		邓鹏	24162018邓鹏	独立董事	1	1		24162018	#N/A	0			24162018	#N/A	0			24162018	#N/A	0			24162018	#N/A	0			24162018	#N/A	0			24162018
2416	2022	24162022	广东省	广东	广东2022	9.96857	0.0155058	张蕊	24162022张蕊	独立董事	1		喻子达	24162022喻子达	非独立董事	0		邓鹏	24162022邓鹏	独立董事	1	0		24162022	#N/A	0			24162022	#N/A	0			24162022	#N/A	0			24162022	#N/A	0			24162022	#N/A	0			24162022
2417	2014	24172014	福建省	福建	福建2014	#N/A	0.0233178	沈维涛	24172014沈维涛	独立董事	1	1	吴炳康	24172014吴炳康	独立董事	1	0	黄海峰	24172014黄海峰	董事	0			24172014	#N/A	0			24172014	#N/A	0			24172014	#N/A	0			24172014	#N/A	0			24172014	#N/A	0			24172014
2417	2015	24172015	福建省	福建	福建2015	1.38629	0.0206139	吴炳康	24172015吴炳康	独立董事	1		沈维涛	24172015沈维涛	独立董事	1	1	胡玉芳	24172015胡玉芳	非独立董事	0			24172015	#N/A	0			24172015	#N/A	0			24172015	#N/A	0			24172015	#N/A	0			24172015	#N/A	0			24172015
2419	2016	24192016	广东省	广东	广东2016	1.94591	0.0237664	郭晋龙	24192016郭晋龙	独立董事	1	1	汪名川	24192016汪名川	董事	0		李世佳	24192016李世佳	董事	0		涂成洲	24192016涂成洲	独立董事	1	0	欧伟明	24192016欧伟明	独立董事	1	0		24192016	#N/A	0			24192016	#N/A	0			24192016	#N/A	0			24192016
2420	2018	24202018	广东省	广东	广东2018	2.56495	0.0175543	白华	24202018白华	独立董事	1		沈肇章	24202018沈肇章	#N/A	0		何宇飞	24202018何宇飞	非独立董事	0		张洋	24202018张洋	#N/A	0			24202018	#N/A	0			24202018	#N/A	0			24202018	#N/A	0			24202018	#N/A	0			24202018
2421	2014	24212014	广东省	广东	广东2014	#N/A	0.0224623	王礼贵	24212014王礼贵	独立董事	1		王晓东	24212014王晓东	独立董事	1	0	程朋胜	24212014程朋胜	董事,副总经理	0			24212014	#N/A	0			24212014	#N/A	0			24212014	#N/A	0			24212014	#N/A	0			24212014	#N/A	0			24212014
2422	2014	24222014	四川省	四川	四川2014	#N/A	0.0166782	张腾文	24222014张腾文	独立董事	1		刘洪	24222014刘洪	独立董事	1	0	潘慧	24222014潘慧	董事,副总经理	0			24222014	#N/A	0			24222014	#N/A	0			24222014	#N/A	0			24222014	#N/A	0			24222014	#N/A	0			24222014
2424	2022	24242022	贵州省	贵州	贵州2022	8.54169	0.0191603	王昱	24242022王昱	独立董事	1		胡坚	24242022胡坚	独立董事	1	0	姜伟	24242022姜伟	董事长	0		牛民	24242022牛民	董事,董事会秘书,总经理	0		刘胜强	24242022刘胜强	独立董事	1	0		24242022	#N/A	0			24242022	#N/A	0			24242022	#N/A	0			24242022
2425	2012	24252012	贵州省	贵州	贵州2012	#N/A	0.0127451	陈建平	24252012陈建平	独立董事	1		郑少强	24252012郑少强	董事,副总经理	0		张声光	24252012张声光	独立董事	1	0		24252012	#N/A	0			24252012	#N/A	0			24252012	#N/A	0			24252012	#N/A	0			24252012	#N/A	0			24252012
2426	2010	24262010	贵州省	贵州	贵州2010	#N/A	0.0203967		24262010	#N/A	0			24262010	#N/A	0			24262010	#N/A	0			24262010	#N/A	0			24262010	#N/A	0			24262010	#N/A	0			24262010	#N/A	0			24262010	#N/A	0			24262010
2426	2013	24262013	贵州省	贵州	贵州2013	#N/A	0.0190853	沃健	24262013沃健	独立董事	1		包燕青	24262013包燕青	董事,副总经理,董事会秘书	0		芮延年	24262013芮延年	独立董事	1	0		24262013	#N/A	0			24262013	#N/A	0			24262013	#N/A	0			24262013	#N/A	0			24262013	#N/A	0			24262013
2426	2022	24262022	江苏省	江苏	江苏2022	9.38597	0.0208616	黄辉	24262022黄辉	独立董事	1		杨金元	24262022杨金元	董事,副总经理	0		张雪芬	24262022张雪芬	独立董事	1	0		24262022	#N/A	0			24262022	#N/A	0			24262022	#N/A	0			24262022	#N/A	0			24262022	#N/A	0			24262022
2429	2014	24292014	广东省	广东	广东2014	#N/A	0.0224623	张力	24292014张力	独立董事	1		姚小聪	24292014姚小聪	独立董事	1	0	周灿	24292014周灿	董事,副总经理	0			24292014	#N/A	0			24292014	#N/A	0			24292014	#N/A	0			24292014	#N/A	0			24292014	#N/A	0			24292014
2429	2020	24292020	广东省	广东	广东2020	2.83321	0.0174561	张俊生	24292020张俊生	独立董事	1		朱伟	24292020朱伟	独立董事	1	0	康健	24292020康健	董事	0			24292020	#N/A	0			24292020	#N/A	0			24292020	#N/A	0			24292020	#N/A	0			24292020	#N/A	0			24292020
2430	2013	24302013	浙江省	浙江	浙江2013	#N/A	0.0203306	赵敏	24302013赵敏	独立董事	1		钮容量	24302013钮容量	独立董事	1	0	顾昶	24302013顾昶	董事	0			24302013	#N/A	0			24302013	#N/A	0			24302013	#N/A	0			24302013	#N/A	0			24302013	#N/A	0			24302013
2430	2014	24302014	浙江省	浙江	浙江2014	#N/A	0.0278689	赵敏	24302014赵敏	独立董事	1		钮容量	24302014钮容量	独立董事	1	0	顾昶	24302014顾昶	董事	0			24302014	#N/A	0			24302014	#N/A	0			24302014	#N/A	0			24302014	#N/A	0			24302014	#N/A	0			24302014
2431	2013	24312013	广东省	广东	广东2013	#N/A	0.0237707	邬筠春	24312013邬筠春	独立董事	1		陆军	24312013陆军	独立董事	1	0	邬筠春	24312013邬筠春	独立董事	1	0	陆军	24312013陆军	独立董事	1	0	李丕岳	24312013李丕岳	董事	0			24312013	#N/A	0			24312013	#N/A	0			24312013	#N/A	0			24312013
2432	2013	24322013	河南省	河南	河南2013	1.79176	0.0150365	陈俊发	24322013陈俊发	独立董事	1		吴思	24322013吴思	独立董事	1	0	李罗力	24322013李罗力	独立董事	1	0		24322013	#N/A	0			24322013	#N/A	0			24322013	#N/A	0			24322013	#N/A	0			24322013	#N/A	0			24322013
2433	2021	24332021	河南省	河南	河南2021	9.2196	0.0199731	聂织锦	24332021聂织锦	独立董事	1	1	刘力	24332021刘力	独立董事	1	0	柯少彬	24332021柯少彬	董事长,总经理	0			24332021	#N/A	0			24332021	#N/A	0			24332021	#N/A	0			24332021	#N/A	0			24332021	#N/A	0			24332021
2437	2010	24372010	浙江省	浙江	浙江2010	#N/A	0.0187642		24372010	#N/A	0			24372010	#N/A	0			24372010	#N/A	0			24372010	#N/A	0			24372010	#N/A	0			24372010	#N/A	0			24372010	#N/A	0			24372010	#N/A	0			24372010
2437	2022	24372022	浙江省	浙江	浙江2022	9.81263	0.013772	胡晋	24372022胡晋	董事长	0		董琦	24372022董琦	独立董事	1	0	杨华蓉	24372022杨华蓉	独立董事	1	0		24372022	#N/A	0			24372022	#N/A	0			24372022	#N/A	0			24372022	#N/A	0			24372022	#N/A	0			24372022
2437	2023	24372023	浙江省	浙江	浙江2023	9.74326	#N/A	张晓丹	24372023张晓丹	独立董事	1		周康	24372023周康	非独立董事,副总经理	0		潘敏	24372023潘敏	独立董事	1	0		24372023	#N/A	0			24372023	#N/A	0			24372023	#N/A	0			24372023	#N/A	0			24372023	#N/A	0			24372023
2439	2014	24392014	北京市	北京	北京2014	#N/A	0.0259314	曹辰	24392014曹辰	独立董事	1		汤敏	24392014汤敏	独立董事	1	0	潘重予	24392014潘重予	董事,副总经理,董事会秘书	0			24392014	#N/A	0			24392014	#N/A	0			24392014	#N/A	0			24392014	#N/A	0			24392014	#N/A	0			24392014
2441	2013	24412013	浙江省	浙江	浙江2013	#N/A	0.0203306	梁烽	24412013梁烽	独立董事	1	1	王学琛	24412013王学琛	独立董事	1	0	柯美莉	24412013柯美莉	董事	0			24412013	#N/A	0			24412013	#N/A	0			24412013	#N/A	0			24412013	#N/A	0			24412013	#N/A	0			24412013
2441	2014	24412014	浙江省	浙江	浙江2014	#N/A	0.0278689	姚明安	24412014姚明安	独立董事	1		曾爱东	24412014曾爱东	独立董事	1	0	陈烘	24412014陈烘	非独立董事,财务总监	0			24412014	#N/A	0			24412014	#N/A	0			24412014	#N/A	0			24412014	#N/A	0			24412014	#N/A	0			24412014
2441	2015	24412015	浙江省	浙江	浙江2015	0.693147	0.022429	姚明安	24412015姚明安	独立董事	1		曾爱东	24412015曾爱东	独立董事	1	0	陈烘	24412015陈烘	非独立董事,财务总监	0			24412015	#N/A	0			24412015	#N/A	0			24412015	#N/A	0			24412015	#N/A	0			24412015	#N/A	0			24412015
2441	2016	24412016	浙江省	浙江	浙江2016	1.09861	0.026311	姚明安	24412016姚明安	独立董事	1		曾爱东	24412016曾爱东	独立董事	1	0	杨松	24412016杨松	非独立董事,副总经理	0			24412016	#N/A	0			24412016	#N/A	0			24412016	#N/A	0			24412016	#N/A	0			24412016	#N/A	0			24412016
2441	2017	24412017	浙江省	浙江	浙江2017	1.09861	0.0181469	姚明安	24412017姚明安	独立董事	1		曾爱东	24412017曾爱东	独立董事	1	0	杨松	24412017杨松	非独立董事,副总经理	0			24412017	#N/A	0			24412017	#N/A	0			24412017	#N/A	0			24412017	#N/A	0			24412017	#N/A	0			24412017
2441	2018	24412018	浙江省	浙江	浙江2018	1.79176	0.0193728	姚明安	24412018姚明安	独立董事	1		曾爱东	24412018曾爱东	独立董事	1	0	杨松	24412018杨松	非独立董事,副总经理	0			24412018	#N/A	0			24412018	#N/A	0			24412018	#N/A	0			24412018	#N/A	0			24412018	#N/A	0			24412018
2441	2019	24412019	浙江省	浙江	浙江2019	4.81218	0.0120027	姚明安	24412019姚明安	独立董事	1		曾爱东	24412019曾爱东	独立董事	1	0	杨松	24412019杨松	非独立董事,副总经理	0			24412019	#N/A	0			24412019	#N/A	0			24412019	#N/A	0			24412019	#N/A	0			24412019	#N/A	0			24412019
2444	2013	24442013	浙江省	浙江	浙江2013	#N/A	0.0203306	吴春京	24442013吴春京	独立董事	1		李邦良	24442013李邦良	独立董事	1	0	许倩	24442013许倩	独立董事	1	0	王玲玲	24442013王玲玲	董事,副总裁	0		徐筝	24442013徐筝	董事	0			24442013	#N/A	0			24442013	#N/A	0			24442013	#N/A	0			24442013
2444	2014	24442014	浙江省	浙江	浙江2014	#N/A	0.0278689	黄爱华	24442014黄爱华	独立董事	1		叶小珍	24442014叶小珍	独立董事	1	0	王玲玲	24442014王玲玲	董事,副总裁	0		徐筝	24442014徐筝	董事	0		张池鳌	24442014张池鳌	独立董事	1	0		24442014	#N/A	0			24442014	#N/A	0			24442014	#N/A	0			24442014
2444	2020	24442020	浙江省	浙江	浙江2020	4.26268	0.0131053	朱亚尔	24442020朱亚尔	独立董事	1		黄爱华	24442020黄爱华	独立董事	1	0	叶小珍	24442020叶小珍	独立董事	1	0	王玲玲	24442020王玲玲	董事,副总裁	0		徐筝	24442020徐筝	董事	0			24442020	#N/A	0			24442020	#N/A	0			24442020	#N/A	0			24442020
2444	2022	24442022	浙江省	浙江	浙江2022	9.81263	0.013772	徐筝	24442022徐筝	董事	0		施虹	24442022施虹	独立董事	1	1	王刚	24442022王刚	独立董事	1	0	陈智敏	24442022陈智敏	独立董事	1	0	王玲玲	24442022王玲玲	董事,副总裁	0			24442022	#N/A	0			24442022	#N/A	0			24442022	#N/A	0			24442022
2446	2017	24462017	浙江省	浙江	浙江2017	1.09861	0.0181469	梁黔义	24462017梁黔义	独立董事	1		何永星	24462017何永星	董事	0		彭晓伟	24462017彭晓伟	独立董事	1	0		24462017	#N/A	0			24462017	#N/A	0			24462017	#N/A	0			24462017	#N/A	0			24462017	#N/A	0			24462017
2446	2019	24462019	浙江省	浙江	浙江2019	4.81218	0.0120027	梁黔义	24462019梁黔义	独立董事	1		何永星	24462019何永星	董事	0		杨振锋	24462019杨振锋	副董事长,副总经理	0		郭依勤	24462019郭依勤	副董事长,副总经理	0		彭晓伟	24462019彭晓伟	独立董事	1	0		24462019	#N/A	0			24462019	#N/A	0			24462019	#N/A	0			24462019
2446	2020	24462020	浙江省	浙江	浙江2020	4.26268	0.0131053	梁黔义	24462020梁黔义	独立董事	1		何永星	24462020何永星	董事	0			24462020	#N/A	0		郭依勤	24462020郭依勤	副董事长,副总经理	0		彭晓伟	24462020彭晓伟	独立董事	1	0		24462020	#N/A	0			24462020	#N/A	0			24462020	#N/A	0			24462020
2446	2022	24462022	浙江省	浙江	浙江2022	9.81263	0.013772	褚庆昕	24462022褚庆昕	独立董事	1		韩三平	24462022韩三平	董事	0		周润书	24462022周润书	独立董事	1	0		24462022	#N/A	0			24462022	#N/A	0			24462022	#N/A	0			24462022	#N/A	0			24462022	#N/A	0			24462022
2446	2023	24462023	浙江省	浙江	浙江2023	9.74326	#N/A	褚庆昕	24462023褚庆昕	独立董事	1		韩三平	24462023韩三平	董事	0		周润书	24462023周润书	独立董事	1	0		24462023	#N/A	0			24462023	#N/A	0			24462023	#N/A	0			24462023	#N/A	0			24462023	#N/A	0			24462023
2447	2012	24472012	浙江省	浙江	浙江2012	#N/A	0.019422	张丽	24472012张丽	独立董事	1		刘晓庆	24472012刘晓庆	董事	0		韩海鸥	24472012韩海鸥	独立董事	1	0		24472012	#N/A	0			24472012	#N/A	0			24472012	#N/A	0			24472012	#N/A	0			24472012	#N/A	0			24472012
2447	2014	24472014	浙江省	浙江	浙江2014	#N/A	0.0278689	姜楠	24472014姜楠	独立董事	1		徐玉岩	24472014徐玉岩	董事,副总经理,生产经营总监	0		刘晓庆	24472014刘晓庆	董事	0		丁慧	24472014丁慧	独立董事	1	0		24472014	#N/A	0			24472014	#N/A	0			24472014	#N/A	0			24472014	#N/A	0			24472014
2447	2015	24472015	浙江省	浙江	浙江2015	0.693147	0.022429	姜楠	24472015姜楠	独立董事	1		徐玉岩	24472015徐玉岩	董事,副总经理,生产经营总监	0		刘晓庆	24472015刘晓庆	董事	0		丁慧	24472015丁慧	独立董事	1	0		24472015	#N/A	0			24472015	#N/A	0			24472015	#N/A	0			24472015	#N/A	0			24472015
2447	2016	24472016	浙江省	浙江	浙江2016	1.09861	0.026311	姜楠	24472016姜楠	独立董事	1		徐玉岩	24472016徐玉岩	董事,副总经理,生产经营总监	0		刘晓庆	24472016刘晓庆	董事长	0		丁慧	24472016丁慧	独立董事	1	0		24472016	#N/A	0			24472016	#N/A	0			24472016	#N/A	0			24472016	#N/A	0			24472016
2447	2017	24472017	浙江省	浙江	浙江2017	1.09861	0.0181469	姜楠	24472017姜楠	独立董事	1		姚栎	24472017姚栎	非独立董事	0		刘晓庆	24472017刘晓庆	董事	0		娄贺统	24472017娄贺统	独立董事	1	0		24472017	#N/A	0			24472017	#N/A	0			24472017	#N/A	0			24472017	#N/A	0			24472017
2451	2016	24512016	浙江省	浙江	浙江2016	1.09861	0.026311	孙勇	24512016孙勇	独立董事	1		潘志强	24512016潘志强	独立董事	1	0	朱志英	24512016朱志英	董事	0			24512016	#N/A	0			24512016	#N/A	0			24512016	#N/A	0			24512016	#N/A	0			24512016	#N/A	0			24512016
2451	2017	24512017	浙江省	浙江	浙江2017	1.09861	0.0181469	彭贵刚	24512017彭贵刚	独立董事	1		袁树民	24512017袁树民	独立董事	1	0	张惟	24512017张惟	总经理,董事	0			24512017	#N/A	0			24512017	#N/A	0			24512017	#N/A	0			24512017	#N/A	0			24512017	#N/A	0			24512017
2453	2015	24532015	浙江省	浙江	浙江2015	0.693147	0.022429	郭澳	24532015郭澳	独立董事	1		谢宏	24532015谢宏	副总经理,董事	0		余荣发	24532015余荣发	独立董事	1	0		24532015	#N/A	0			24532015	#N/A	0			24532015	#N/A	0			24532015	#N/A	0			24532015	#N/A	0			24532015
2453	2017	24532017	浙江省	浙江	浙江2017	1.09861	0.0181469	赵西卜	24532017赵西卜	独立董事	1		沈明宏	24532017沈明宏	副董事长	0		李德峰	24532017李德峰	独立董事	1	1		24532017	#N/A	0			24532017	#N/A	0			24532017	#N/A	0			24532017	#N/A	0			24532017	#N/A	0			24532017
2453	2018	24532018	浙江省	浙江	浙江2018	1.79176	0.0193728	赵西卜	24532018赵西卜	独立董事	1		沈明宏	24532018沈明宏	副董事长	0		李德峰	24532018李德峰	独立董事	1	1		24532018	#N/A	0			24532018	#N/A	0			24532018	#N/A	0			24532018	#N/A	0			24532018	#N/A	0			24532018
2454	2010	24542010	上海市	上海	上海2010	#N/A	0.014157		24542010	#N/A	0			24542010	#N/A	0			24542010	#N/A	0			24542010	#N/A	0			24542010	#N/A	0			24542010	#N/A	0			24542010	#N/A	0			24542010	#N/A	0			24542010
2454	2017	24542017	上海市	上海	上海2017	2.56495	0.0153257	刘榕	24542017刘榕	独立董事	1		纪安康	24542017纪安康	副董事长,总经理	0		凌玉章	24542017凌玉章	独立董事	1	1		24542017	#N/A	0			24542017	#N/A	0			24542017	#N/A	0			24542017	#N/A	0			24542017	#N/A	0			24542017
2455	2010	24552010	上海市	上海	上海2010	#N/A	0.014157		24552010	#N/A	0			24552010	#N/A	0			24552010	#N/A	0			24552010	#N/A	0			24552010	#N/A	0			24552010	#N/A	0			24552010	#N/A	0			24552010	#N/A	0			24552010
2455	2012	24552012	上海市	上海	上海2012	#N/A	0.0123239		24552012	#N/A	0			24552012	#N/A	0			24552012	#N/A	0			24552012	#N/A	0			24552012	#N/A	0			24552012	#N/A	0			24552012	#N/A	0			24552012	#N/A	0			24552012
2455	2017	24552017	上海市	上海	上海2017	2.56495	0.0153257	周钧明	24552017周钧明	独立董事	1		郑铁江	24552017郑铁江	董事长	0		黄建康	24552017黄建康	独立董事	1	0		24552017	#N/A	0			24552017	#N/A	0			24552017	#N/A	0			24552017	#N/A	0			24552017	#N/A	0			24552017
2455	2018	24552018	上海市	上海	上海2018	3.3322	0.0169541	周钧明	24552018周钧明	独立董事	1		郑铁江	24552018郑铁江	董事长	0		黄建康	24552018黄建康	独立董事	1	0		24552018	#N/A	0			24552018	#N/A	0			24552018	#N/A	0			24552018	#N/A	0			24552018	#N/A	0			24552018
2458	2017	24582017	山东省	山东	山东2017	2.07944	0.0146452	战继红	24582017战继红	独立董事	1		刘学信	24582017刘学信	独立董事	1	0	曹积生	24582017曹积生	董事长	0			24582017	#N/A	0			24582017	#N/A	0			24582017	#N/A	0			24582017	#N/A	0			24582017	#N/A	0			24582017
2458	2019	24582019	山东省	山东	山东2019	3.21888	0.0146235	战继红	24582019战继红	独立董事	1		刘学信	24582019刘学信	独立董事	1	0	曹积生	24582019曹积生	董事长	0			24582019	#N/A	0			24582019	#N/A	0			24582019	#N/A	0			24582019	#N/A	0			24582019	#N/A	0			24582019
2458	2020	24582020	山东省	山东	山东2020	3.49651	0.0128581	战淑萍	24582020战淑萍	独立董事	1		张平华	24582020张平华	独立董事	1	0	曹积生	24582020曹积生	董事长,总裁	0			24582020	#N/A	0			24582020	#N/A	0			24582020	#N/A	0			24582020	#N/A	0			24582020	#N/A	0			24582020
2460	2010	24602010	河北省	河北	河北2010	#N/A	0.0137727	余新培	24602010余新培	独立董事	1		张玲君	24602010张玲君	独立董事	1	0	赵立功	24602010赵立功	董事	0			24602010	#N/A	0			24602010	#N/A	0			24602010	#N/A	0			24602010	#N/A	0			24602010	#N/A	0			24602010
2460	2011	24602011	河北省	河北	河北2011	#N/A	0.0173327	余新培	24602011余新培	独立董事	1		张玲君	24602011张玲君	独立董事	1	0	纪晨贇	24602011纪晨贇	#N/A	0			24602011	#N/A	0			24602011	#N/A	0			24602011	#N/A	0			24602011	#N/A	0			24602011	#N/A	0			24602011
2460	2015	24602015	江西省	江西	江西2015	#N/A	0.017342	何渭滨	24602015何渭滨	#N/A	0		沈海博	24602015沈海博	董事,副总裁	0		郭华平	24602015郭华平	独立董事	1	0		24602015	#N/A	0			24602015	#N/A	0			24602015	#N/A	0			24602015	#N/A	0			24602015	#N/A	0			24602015
2460	2016	24602016	江西省	江西	江西2016	#N/A	0.0204209	何渭滨	24602016何渭滨	#N/A	0		沈海博	24602016沈海博	董事,副总裁	0		郭华平	24602016郭华平	独立董事	1	0		24602016	#N/A	0			24602016	#N/A	0			24602016	#N/A	0			24602016	#N/A	0			24602016	#N/A	0			24602016
2461	2010	24612010	广东省	广东	广东2010	#N/A	0.0216352		24612010	#N/A	0			24612010	#N/A	0			24612010	#N/A	0			24612010	#N/A	0			24612010	#N/A	0			24612010	#N/A	0			24612010	#N/A	0			24612010	#N/A	0			24612010
2461	2013	24612013	广东省	广东	广东2013	#N/A	0.0237707	林斌	24612013林斌	独立董事	1		杨永福	24612013杨永福	独立董事	1	0	曹洲涛	24612013曹洲涛	独立董事	1	0	廖加宁	24612013廖加宁	总经理,董事	0		王仁荣	24612013王仁荣	董事	0			24612013	#N/A	0			24612013	#N/A	0			24612013	#N/A	0			24612013
2461	2017	24612017	广东省	广东	广东2017	2.70805	0.0163228	王志斌	24612017王志斌	董事,总经理	0		王仁荣	24612017王仁荣	董事	0		林斌	24612017林斌	独立董事	1	0	陈平	24612017陈平	独立董事	1	0	宋铁波	24612017宋铁波	独立董事	1	0		24612017	#N/A	0			24612017	#N/A	0			24612017	#N/A	0			24612017
2461	2022	24612022	广东省	广东	广东2022	9.96857	0.0155058	柯睿格	24612022柯睿格	董事	0		宋铁波	24612022宋铁波	独立董事	1	1	韩振平	24612022韩振平	独立董事	1	0	陈平	24612022陈平	独立董事	1	0	黄文胜	24612022黄文胜	副董事长,总经理	0			24612022	#N/A	0			24612022	#N/A	0			24612022	#N/A	0			24612022
2461	2023	24612023	广东省	广东	广东2023	9.88283	#N/A	柯睿格	24612023柯睿格	董事	0		曹庸	24612023曹庸	独立董事	1	0	韩振平	24612023韩振平	独立董事	1	0	何兴强	24612023何兴强	独立董事	1	0	黄文胜	24612023黄文胜	副董事长,总经理	0			24612023	#N/A	0			24612023	#N/A	0			24612023	#N/A	0			24612023
2462	2013	24622013	北京市	北京	北京2013	#N/A	0.0228363	马永义	24622013马永义	独立董事	1		武文生	24622013武文生	独立董事	1	0	张建平	24622013张建平	董事	0			24622013	#N/A	0			24622013	#N/A	0			24622013	#N/A	0			24622013	#N/A	0			24622013	#N/A	0			24622013
2462	2017	24622017	北京市	北京	北京2017	#N/A	0.0270469	吴剑	24622017吴剑	独立董事	1		徐永光	24622017徐永光	独立董事	1	0	张建平	24622017张建平	董事	0			24622017	#N/A	0			24622017	#N/A	0			24622017	#N/A	0			24622017	#N/A	0			24622017	#N/A	0			24622017
2462	2018	24622018	北京市	北京	北京2018	1.79176	0.028059	吴剑	24622018吴剑	独立董事	1		徐永光	24622018徐永光	独立董事	1	0	张建平	24622018张建平	董事	0			24622018	#N/A	0			24622018	#N/A	0			24622018	#N/A	0			24622018	#N/A	0			24622018	#N/A	0			24622018
2463	2013	24632013	北京市	北京	北京2013	#N/A	0.0228363	杨蓉	24632013杨蓉	独立董事	1		郑慧珍	24632013郑慧珍	独立董事	1	0	陈梅芳	24632013陈梅芳	副董事长	0			24632013	#N/A	0			24632013	#N/A	0			24632013	#N/A	0			24632013	#N/A	0			24632013	#N/A	0			24632013
2463	2015	24632015	江苏省	江苏	江苏2015	#N/A	0.0237915	杨蓉	24632015杨蓉	独立董事	1		吴安甫	24632015吴安甫	独立董事	1	1	陈梅芳	24632015陈梅芳	副董事长	0			24632015	#N/A	0			24632015	#N/A	0			24632015	#N/A	0			24632015	#N/A	0			24632015	#N/A	0			24632015
2464	2014	24642014	江苏省	江苏	江苏2014	#N/A	0.0247383	韩凤菊	24642014韩凤菊	独立董事	1		廖日昇	24642014廖日昇	董事	0		于海纯	24642014于海纯	独立董事	1	0		24642014	#N/A	0			24642014	#N/A	0			24642014	#N/A	0			24642014	#N/A	0			24642014	#N/A	0			24642014
2466	2023	24662023	四川省	四川	四川2023	9.25043	#N/A	唐国琼	24662023唐国琼	独立董事	1		向川	24662023向川	独立董事	1	0	黄玮	24662023黄玮	独立董事	1	0		24662023	#N/A	0			24662023	#N/A	0			24662023	#N/A	0			24662023	#N/A	0			24662023	#N/A	0			24662023
2467	2013	24672013	四川省	四川	四川2013	#N/A	0.0157208	王连凤	24672013王连凤	独立董事	1		应华江	24672013应华江	独立董事	1	0	张大庆	24672013张大庆	#N/A	0		Jie Zhao	24672013Jie Zhao	副总裁,非独立董事	1	0		24672013	#N/A	0			24672013	#N/A	0			24672013	#N/A	0			24672013	#N/A	0			24672013
2467	2014	24672014	四川省	四川	四川2014	#N/A	0.0166782	王连凤	24672014王连凤	独立董事	1		应华江	24672014应华江	独立董事	1	0	Jie Zhao	24672014Jie Zhao	非独立董事,副总裁	0			24672014	#N/A	0			24672014	#N/A	0			24672014	#N/A	0			24672014	#N/A	0			24672014	#N/A	0			24672014
2467	2015	24672015	四川省	四川	四川2015	0.693147	0.0208623	张克	24672015张克	独立董事	1		应华江	24672015应华江	独立董事	1	0	Jie Zhao	24672015Jie Zhao	非独立董事,副总裁	0			24672015	#N/A	0			24672015	#N/A	0			24672015	#N/A	0			24672015	#N/A	0			24672015	#N/A	0			24672015
2467	2019	24672019	四川省	四川	四川2019	2.70805	0.0202815	张克	24672019张克	独立董事	1		金玉丹	24672019金玉丹	独立董事	1	0	芦兵	24672019芦兵	董事,总裁	0			24672019	#N/A	0			24672019	#N/A	0			24672019	#N/A	0			24672019	#N/A	0			24672019	#N/A	0			24672019
2468	2021	24682021	浙江省	浙江	浙江2021	9.66402	0.0154038	俞乐平	24682021俞乐平	独立董事	1	1	王文彬	24682021王文彬	董事,总经理	0		沈红波	24682021沈红波	独立董事	1	0		24682021	#N/A	0			24682021	#N/A	0			24682021	#N/A	0			24682021	#N/A	0			24682021	#N/A	0			24682021
2468	2022	24682022	浙江省	浙江	浙江2022	9.81263	0.013772	俞乐平	24682022俞乐平	独立董事	1	1	王文彬	24682022王文彬	董事,总经理	0		沈红波	24682022沈红波	独立董事	1	0		24682022	#N/A	0			24682022	#N/A	0			24682022	#N/A	0			24682022	#N/A	0			24682022	#N/A	0			24682022
2469	2010	24692010	浙江省	浙江	浙江2010	#N/A	0.0187642	潘爱玲	24692010潘爱玲	独立董事	1	1	马国华	24692010马国华	独立董事	1	0	王成富	24692010王成富	董事	0			24692010	#N/A	0			24692010	#N/A	0			24692010	#N/A	0			24692010	#N/A	0			24692010	#N/A	0			24692010
2469	2016	24692016	浙江省	浙江	浙江2016	1.09861	0.026311	刘海英	24692016刘海英	独立董事	1		赵金立	24692016赵金立	独立董事	1	0	高勇	24692016高勇	董事,董事会秘书,副总经理	0			24692016	#N/A	0			24692016	#N/A	0			24692016	#N/A	0			24692016	#N/A	0			24692016	#N/A	0			24692016
2469	2017	24692017	浙江省	浙江	浙江2017	1.09861	0.0181469	刘海英	24692017刘海英	独立董事	1		张式军	24692017张式军	独立董事	1	1	高勇	24692017高勇	董事,董事会秘书,副总经理	0			24692017	#N/A	0			24692017	#N/A	0			24692017	#N/A	0			24692017	#N/A	0			24692017	#N/A	0			24692017
2470	2017	24702017	山东省	山东	山东2017	2.07944	0.0146452	万连步	24702017万连步	董事长,总经理	0		祝祖强	24702017祝祖强	独立董事	1	0	吕晓峰	24702017吕晓峰	独立董事	1	0		24702017	#N/A	0			24702017	#N/A	0			24702017	#N/A	0			24702017	#N/A	0			24702017	#N/A	0			24702017
2471	2017	24712017	山东省	山东	山东2017	2.07944	0.0146452	史勤	24712017史勤	独立董事	1		鲁桐	24712017鲁桐	独立董事	1	0	俞雷	24712017俞雷	副董事长	0		吴鸣良	24712017吴鸣良	职工监事,监事会副主席,董事,副总经理	0		吴燕	24712017吴燕	独立董事	1	0		24712017	#N/A	0			24712017	#N/A	0			24712017	#N/A	0			24712017
2471	2021	24712021	山东省	山东	山东2021	9.50956	0.0155433	范志军	24712021范志军	独立董事	1		蒋锋	24712021蒋锋	独立董事	1	0	朱勇刚	24712021朱勇刚	独立董事	1	0	俞雷	24712021俞雷	董事长,总经理	0		刘保记	24712021刘保记	监事会副主席,职工代表监事,副董事长,职工代表董事	0			24712021	#N/A	0			24712021	#N/A	0			24712021	#N/A	0			24712021
2472	2010	24722010	山东省	山东	山东2010	#N/A	0.0142992	李水土	24722010李水土	董事,常务副总经理	0			24722010	#N/A	0			24722010	#N/A	0			24722010	#N/A	0			24722010	#N/A	0			24722010	#N/A	0			24722010	#N/A	0			24722010	#N/A	0			24722010
2473	2013	24732013	山东省	山东	山东2013	2.3979	0.0191595	任德慧	24732013任德慧	独立董事	1		林钒	24732013林钒	董事	0		杨运杰	24732013杨运杰	独立董事	1	0		24732013	#N/A	0			24732013	#N/A	0			24732013	#N/A	0			24732013	#N/A	0			24732013	#N/A	0			24732013
2474	2015	24742015	福建省	福建	福建2015	1.38629	0.0206139	鲁峰	24742015鲁峰	董事长,总裁	0		刘微芳	24742015刘微芳	独立董事	1	0		24742015	#N/A	0			24742015	#N/A	0			24742015	#N/A	0			24742015	#N/A	0			24742015	#N/A	0			24742015	#N/A	0			24742015
2474	2017	24742017	福建省	福建	福建2017	1.94591	0.0220731	鲁峰	24742017鲁峰	董事长,总裁	0		黄旭明	24742017黄旭明	独立董事	1	0	刘微芳	24742017刘微芳	独立董事	1	0		24742017	#N/A	0			24742017	#N/A	0			24742017	#N/A	0			24742017	#N/A	0			24742017	#N/A	0			24742017
2474	2019	24742019	福建省	福建	福建2019	3.13549	0.0220985	鲁峰	24742019鲁峰	董事长,总裁	0		黄旭明	24742019黄旭明	独立董事	1	0	刘微芳	24742019刘微芳	独立董事	1	0		24742019	#N/A	0			24742019	#N/A	0			24742019	#N/A	0			24742019	#N/A	0			24742019	#N/A	0			24742019
2474	2020	24742020	福建省	福建	福建2020	2.63906	0.0207933	鲁峰	24742020鲁峰	董事长,总裁	0		胡继荣	24742020胡继荣	独立董事	1	1	叶东毅	24742020叶东毅	独立董事	1	0		24742020	#N/A	0			24742020	#N/A	0			24742020	#N/A	0			24742020	#N/A	0			24742020	#N/A	0			24742020
2474	2022	24742022	福建省	福建	福建2022	8.42858	0.0129832	鲁峰	24742022鲁峰	董事长,总裁	0		胡继荣	24742022胡继荣	独立董事	1	0	叶东毅	24742022叶东毅	独立董事	1	0		24742022	#N/A	0			24742022	#N/A	0			24742022	#N/A	0			24742022	#N/A	0			24742022	#N/A	0			24742022
2476	2023	24762023	广东省	广东	广东2023	9.88283	#N/A	童利忠	24762023童利忠	独立董事	1		王伟名	24762023王伟名	非独立董事	0		郭忠林	24762023郭忠林	独立董事	1	0		24762023	#N/A	0			24762023	#N/A	0			24762023	#N/A	0			24762023	#N/A	0			24762023	#N/A	0			24762023
2477	2015	24772015	广东省	广东	广东2015	0.693147	0.0185536	王秀	24772015王秀	独立董事	1		甘培忠	24772015甘培忠	独立董事	1	0	徐桂芳	24772015徐桂芳	独立董事	1	0	侯五群	24772015侯五群	副董事长,副总裁	0		吴易得	24772015吴易得	董事,董事会秘书,副总裁	0			24772015	#N/A	0			24772015	#N/A	0			24772015	#N/A	0			24772015
2478	2010	24782010	广东省	广东	广东2010	#N/A	0.0216352		24782010	#N/A	0			24782010	#N/A	0			24782010	#N/A	0			24782010	#N/A	0			24782010	#N/A	0			24782010	#N/A	0			24782010	#N/A	0			24782010	#N/A	0			24782010
2478	2012	24782012	广东省	广东	广东2012	0.693147	0.0230561	张燕	24782012张燕	独立董事	1		佘上能	24782012佘上能	独立董事	1	0	周家华	24782012周家华	董事,副总经理	0			24782012	#N/A	0			24782012	#N/A	0			24782012	#N/A	0			24782012	#N/A	0			24782012	#N/A	0			24782012
2478	2022	24782022	广东省	广东	广东2022	9.96857	0.0155058	高允斌	24782022高允斌	独立董事	1	1	韩巧林	24782022韩巧林	董事,总经理,董事会秘书	0		罗实劲	24782022罗实劲	独立董事	1	0		24782022	#N/A	0			24782022	#N/A	0			24782022	#N/A	0			24782022	#N/A	0			24782022	#N/A	0			24782022
2479	2015	24792015	浙江省	浙江	浙江2015	0.693147	0.022429	章击舟	24792015章击舟	独立董事	1	1	郑秀花	24792015郑秀花	董事	0		舒敏	24792015舒敏	独立董事	1	1		24792015	#N/A	0			24792015	#N/A	0			24792015	#N/A	0			24792015	#N/A	0			24792015	#N/A	0			24792015
2479	2020	24792020	浙江省	浙江	浙江2020	4.26268	0.0131053	舒敏	24792020舒敏	独立董事	1		郑秀花	24792020郑秀花	董事	0		郑勇军	24792020郑勇军	独立董事	1	0		24792020	#N/A	0			24792020	#N/A	0			24792020	#N/A	0			24792020	#N/A	0			24792020	#N/A	0			24792020
2481	2012	24812012	浙江省	浙江	浙江2012	#N/A	0.019422	张君	24812012张君	独立董事	1		赵学伟	24812012赵学伟	独立董事	1	0	隋君美	24812012隋君美	董事,副总经理,财务总监	0			24812012	#N/A	0			24812012	#N/A	0			24812012	#N/A	0			24812012	#N/A	0			24812012	#N/A	0			24812012
2481	2023	24812023	浙江省	浙江	浙江2023	9.74326	#N/A	刘书贤	24812023刘书贤	董事	0		范忠廷	24812023范忠廷	独立董事	1	0	谢光义	24812023谢光义	独立董事	1	0		24812023	#N/A	0			24812023	#N/A	0			24812023	#N/A	0			24812023	#N/A	0			24812023	#N/A	0			24812023
2482	2020	24822020	广东省	广东	广东2020	2.83321	0.0174561	刘标	24822020刘标	独立董事	1		高刚	24822020高刚	独立董事	1	0	刘平春	24822020刘平春	独立董事	1	0	叶嘉铭	24822020叶嘉铭	董事,总经理	0		李卫社	24822020李卫社	副总裁	0			24822020	#N/A	0			24822020	#N/A	0			24822020	#N/A	0			24822020
2483	2013	24832013	广东省	广东	广东2013	#N/A	0.0237707	徐胜锐	24832013徐胜锐	独立董事	1		倪受彬	24832013倪受彬	独立董事	1	0	谢贵兴	24832013谢贵兴	董事,副总裁,董事会秘书	0			24832013	#N/A	0			24832013	#N/A	0			24832013	#N/A	0			24832013	#N/A	0			24832013	#N/A	0			24832013
2484	2012	24842012	广东省	广东	广东2012	0.693147	0.0230561	秦霞	24842012秦霞	独立董事	1		梁子权	24842012梁子权	董事	0		林素芬	24842012林素芬	独立董事	1	0		24842012	#N/A	0			24842012	#N/A	0			24842012	#N/A	0			24842012	#N/A	0			24842012	#N/A	0			24842012
2484	2013	24842013	广东省	广东	广东2013	#N/A	0.0237707	秦霞	24842013秦霞	独立董事	1		梁子权	24842013梁子权	董事	0		林素芬	24842013林素芬	独立董事	1	0		24842013	#N/A	0			24842013	#N/A	0			24842013	#N/A	0			24842013	#N/A	0			24842013	#N/A	0			24842013
2484	2017	24842017	广东省	广东	广东2017	2.70805	0.0163228	施平	24842017施平	独立董事	1		梁子权	24842017梁子权	董事	0		陈忠逸	24842017陈忠逸	独立董事	1	0		24842017	#N/A	0			24842017	#N/A	0			24842017	#N/A	0			24842017	#N/A	0			24842017	#N/A	0			24842017
2484	2018	24842018	广东省	广东	广东2018	2.56495	0.0175543	施平	24842018施平	独立董事	1		梁子权	24842018梁子权	董事	0		陈忠逸	24842018陈忠逸	独立董事	1	0		24842018	#N/A	0			24842018	#N/A	0			24842018	#N/A	0			24842018	#N/A	0			24842018	#N/A	0			24842018
2484	2019	24842019	广东省	广东	广东2019	2.77259	0.0140111	施平	24842019施平	独立董事	1		梁子权	24842019梁子权	董事	0		陈忠逸	24842019陈忠逸	独立董事	1	0		24842019	#N/A	0			24842019	#N/A	0			24842019	#N/A	0			24842019	#N/A	0			24842019	#N/A	0			24842019
2484	2020	24842020	广东省	广东	广东2020	2.83321	0.0174561	沈小燕	24842020沈小燕	独立董事	1		梁子权	24842020梁子权	董事	0		陈忠逸	24842020陈忠逸	独立董事	1	0		24842020	#N/A	0			24842020	#N/A	0			24842020	#N/A	0			24842020	#N/A	0			24842020	#N/A	0			24842020
2484	2022	24842022	广东省	广东	广东2022	9.96857	0.0155058	古群	24842022古群	独立董事	1		沈小燕	24842022沈小燕	独立董事	1	0	梁子权	24842022梁子权	董事	0			24842022	#N/A	0			24842022	#N/A	0			24842022	#N/A	0			24842022	#N/A	0			24842022	#N/A	0			24842022
2484	2023	24842023	广东省	广东	广东2023	9.88283	#N/A	古群	24842023古群	独立董事	1		沈小燕	24842023沈小燕	独立董事	1	0	梁子权	24842023梁子权	董事	0			24842023	#N/A	0			24842023	#N/A	0			24842023	#N/A	0			24842023	#N/A	0			24842023	#N/A	0			24842023
2485	2023	24852023	广东省	广东	广东2023	9.88283	#N/A	刘善敏	24852023刘善敏	独立董事	1		李长霞	24852023李长霞	独立董事	1	0	李丹	24852023李丹	非独立董事	0			24852023	#N/A	0			24852023	#N/A	0			24852023	#N/A	0			24852023	#N/A	0			24852023	#N/A	0			24852023
2487	2010	24872010	广东省	广东	广东2010	#N/A	0.0216352		24872010	#N/A	0			24872010	#N/A	0			24872010	#N/A	0			24872010	#N/A	0			24872010	#N/A	0			24872010	#N/A	0			24872010	#N/A	0			24872010	#N/A	0			24872010
2487	2011	24872011	广东省	广东	广东2011	#N/A	0.0199093		24872011	#N/A	0			24872011	#N/A	0			24872011	#N/A	0			24872011	#N/A	0			24872011	#N/A	0			24872011	#N/A	0			24872011	#N/A	0			24872011	#N/A	0			24872011
2487	2017	24872017	广东省	广东	广东2017	2.70805	0.0163228	孙文纺	24872017孙文纺	独立董事	1		许峰	24872017许峰	独立董事	1	0	陈雪芳	24872017陈雪芳	董事	0			24872017	#N/A	0			24872017	#N/A	0			24872017	#N/A	0			24872017	#N/A	0			24872017	#N/A	0			24872017
2487	2019	24872019	广东省	广东	广东2019	2.77259	0.0140111	孙文纺	24872019孙文纺	独立董事	1		许峰	24872019许峰	独立董事	1	0	陈雪芳	24872019陈雪芳	董事,财务总监	0			24872019	#N/A	0			24872019	#N/A	0			24872019	#N/A	0			24872019	#N/A	0			24872019	#N/A	0			24872019
2490	2012	24902012	浙江省	浙江	浙江2012	#N/A	0.019422		24902012	#N/A	0			24902012	#N/A	0			24902012	#N/A	0			24902012	#N/A	0			24902012	#N/A	0			24902012	#N/A	0			24902012	#N/A	0			24902012	#N/A	0			24902012
2490	2013	24902013	浙江省	浙江	浙江2013	#N/A	0.0203306		24902013	#N/A	0			24902013	#N/A	0			24902013	#N/A	0			24902013	#N/A	0			24902013	#N/A	0			24902013	#N/A	0			24902013	#N/A	0			24902013	#N/A	0			24902013
2490	2014	24902014	浙江省	浙江	浙江2014	#N/A	0.0278689		24902014	#N/A	0			24902014	#N/A	0			24902014	#N/A	0			24902014	#N/A	0			24902014	#N/A	0			24902014	#N/A	0			24902014	#N/A	0			24902014	#N/A	0			24902014
2490	2015	24902015	浙江省	浙江	浙江2015	0.693147	0.022429		24902015	#N/A	0			24902015	#N/A	0			24902015	#N/A	0			24902015	#N/A	0			24902015	#N/A	0			24902015	#N/A	0			24902015	#N/A	0			24902015	#N/A	0			24902015
2490	2017	24902017	浙江省	浙江	浙江2017	1.09861	0.0181469		24902017	#N/A	0			24902017	#N/A	0			24902017	#N/A	0			24902017	#N/A	0			24902017	#N/A	0			24902017	#N/A	0			24902017	#N/A	0			24902017	#N/A	0			24902017
2494	2012	24942012	浙江省	浙江	浙江2012	#N/A	0.019422	王志雄	24942012王志雄	独立董事	1		郗铁庄	24942012郗铁庄	董事,副总经理	0		刘雪松	24942012刘雪松	独立董事	1	0		24942012	#N/A	0			24942012	#N/A	0			24942012	#N/A	0			24942012	#N/A	0			24942012	#N/A	0			24942012
2494	2013	24942013	浙江省	浙江	浙江2013	#N/A	0.0203306	王志雄	24942013王志雄	独立董事	1		郗铁庄	24942013郗铁庄	董事,副总经理	0		刘雪松	24942013刘雪松	独立董事	1	0		24942013	#N/A	0			24942013	#N/A	0			24942013	#N/A	0			24942013	#N/A	0			24942013	#N/A	0			24942013
2494	2014	24942014	浙江省	浙江	浙江2014	#N/A	0.0278689	王志雄	24942014王志雄	独立董事	1		郗铁庄	24942014郗铁庄	董事,副总经理	0		刘雪松	24942014刘雪松	独立董事	1	0		24942014	#N/A	0			24942014	#N/A	0			24942014	#N/A	0			24942014	#N/A	0			24942014	#N/A	0			24942014
2494	2015	24942015	浙江省	浙江	浙江2015	0.693147	0.022429	王志雄	24942015王志雄	独立董事	1		郗铁庄	24942015郗铁庄	董事,副总经理	0		刘雪松	24942015刘雪松	独立董事	1	0		24942015	#N/A	0			24942015	#N/A	0			24942015	#N/A	0			24942015	#N/A	0			24942015	#N/A	0			24942015
2494	2016	24942016	浙江省	浙江	浙江2016	1.09861	0.026311	马卫国	24942016马卫国	独立董事	1		郗铁庄	24942016郗铁庄	董事,副总经理	0		谢蓓	24942016谢蓓	独立董事	1	0		24942016	#N/A	0			24942016	#N/A	0			24942016	#N/A	0			24942016	#N/A	0			24942016	#N/A	0			24942016
2494	2017	24942017	浙江省	浙江	浙江2017	1.09861	0.0181469	马卫国	24942017马卫国	独立董事	1		郗铁庄	24942017郗铁庄	董事,副总经理	0		谢蓓	24942017谢蓓	独立董事	1	0		24942017	#N/A	0			24942017	#N/A	0			24942017	#N/A	0			24942017	#N/A	0			24942017	#N/A	0			24942017
2494	2018	24942018	浙江省	浙江	浙江2018	1.79176	0.0193728		24942018	#N/A	0			24942018	#N/A	0		谢蓓	24942018谢蓓	独立董事	1	0		24942018	#N/A	0			24942018	#N/A	0			24942018	#N/A	0			24942018	#N/A	0			24942018	#N/A	0			24942018
2494	2019	24942019	浙江省	浙江	浙江2019	4.81218	0.0120027	韩景利	24942019韩景利	独立董事	1		郗惠宁	24942019郗惠宁	董事,董事会秘书	0		谢蓓	24942019谢蓓	独立董事	1	0		24942019	#N/A	0			24942019	#N/A	0			24942019	#N/A	0			24942019	#N/A	0			24942019	#N/A	0			24942019
2494	2020	24942020	浙江省	浙江	浙江2020	4.26268	0.0131053	韩景利	24942020韩景利	独立董事	1		郗惠宁	24942020郗惠宁	董事,董事会秘书	0		谢蓓	24942020谢蓓	独立董事	1	0		24942020	#N/A	0			24942020	#N/A	0			24942020	#N/A	0			24942020	#N/A	0			24942020	#N/A	0			24942020
2495	2017	24952017	浙江省	浙江	浙江2017	1.09861	0.0181469	许巧婵	24952017许巧婵	副董事长	0		林则强	24952017林则强	独立董事	1	0	林冬存	24952017林冬存	独立董事	1	0		24952017	#N/A	0			24952017	#N/A	0			24952017	#N/A	0			24952017	#N/A	0			24952017	#N/A	0			24952017
2495	2018	24952018	浙江省	浙江	浙江2018	1.79176	0.0193728	许巧婵	24952018许巧婵	副董事长	0		林则强	24952018林则强	独立董事	1	0	林冬存	24952018林冬存	独立董事	1	0		24952018	#N/A	0			24952018	#N/A	0			24952018	#N/A	0			24952018	#N/A	0			24952018	#N/A	0			24952018
2496	2011	24962011	浙江省	浙江	浙江2011	#N/A	0.0219653	李昌莲	24962011李昌莲	独立董事	1		江树人	24962011江树人	独立董事	1	1	贲银良	24962011贲银良	董事,董事会秘书	0			24962011	#N/A	0			24962011	#N/A	0			24962011	#N/A	0			24962011	#N/A	0			24962011	#N/A	0			24962011
2496	2012	24962012	浙江省	浙江	浙江2012	#N/A	0.019422	李昌莲	24962012李昌莲	独立董事	1		江树人	24962012江树人	独立董事	1	1	贲银良	24962012贲银良	董事,董事会秘书	0			24962012	#N/A	0			24962012	#N/A	0			24962012	#N/A	0			24962012	#N/A	0			24962012	#N/A	0			24962012
2496	2013	24962013	浙江省	浙江	浙江2013	#N/A	0.0203306	李昌莲	24962013李昌莲	独立董事	1		江树人	24962013江树人	独立董事	1	1	姜正霞	24962013姜正霞	董事	0			24962013	#N/A	0			24962013	#N/A	0			24962013	#N/A	0			24962013	#N/A	0			24962013	#N/A	0			24962013
2497	2015	24972015	浙江省	浙江	浙江2015	0.693147	0.022429	干胜道	24972015干胜道	独立董事	1		周友苏	24972015周友苏	独立董事	1	0	杜鹃	24972015杜鹃	董事,财务总监	0			24972015	#N/A	0			24972015	#N/A	0			24972015	#N/A	0			24972015	#N/A	0			24972015	#N/A	0			24972015
2497	2016	24972016	浙江省	浙江	浙江2016	1.09861	0.026311	干胜道	24972016干胜道	独立董事	1		周友苏	24972016周友苏	独立董事	1	0	杜鹃	24972016杜鹃	董事	0			24972016	#N/A	0			24972016	#N/A	0			24972016	#N/A	0			24972016	#N/A	0			24972016	#N/A	0			24972016
2497	2017	24972017	浙江省	浙江	浙江2017	1.09861	0.0181469	干胜道	24972017干胜道	独立董事	1		周友苏	24972017周友苏	独立董事	1	0	杜鹃	24972017杜鹃	董事	0			24972017	#N/A	0			24972017	#N/A	0			24972017	#N/A	0			24972017	#N/A	0			24972017	#N/A	0			24972017
2498	2012	24982012	山东省	山东	山东2012	0.693147	0.0142408	樊培银	24982012樊培银	独立董事	1		王圣诵	24982012王圣诵	独立董事	1	0	张立刚	24982012张立刚	董事	0			24982012	#N/A	0			24982012	#N/A	0			24982012	#N/A	0			24982012	#N/A	0			24982012	#N/A	0			24982012
2499	2020	24992020	山东省	山东	山东2020	3.49651	0.0128581	李定清	24992020李定清	独立董事	1		赵万一	24992020赵万一	独立董事	1	1		24992020	#N/A	0			24992020	#N/A	0			24992020	#N/A	0			24992020	#N/A	0			24992020	#N/A	0			24992020	#N/A	0			24992020
2501	2010	25012010	山西省	山西	山西2010	0.693147	0.018821		25012010	#N/A	0			25012010	#N/A	0			25012010	#N/A	0			25012010	#N/A	0			25012010	#N/A	0			25012010	#N/A	0			25012010	#N/A	0			25012010	#N/A	0			25012010
2503	2011	25032011	广东省	广东	广东2011	#N/A	0.0199093		25032011	#N/A	0			25032011	#N/A	0			25032011	#N/A	0			25032011	#N/A	0			25032011	#N/A	0			25032011	#N/A	0			25032011	#N/A	0			25032011	#N/A	0			25032011
2504	2016	25042016	广东省	广东	广东2016	1.94591	0.0237664	王德宏	25042016王德宏	独立董事	1		甄建涛	25042016甄建涛	副董事长,总经理	0		朱征夫	25042016朱征夫	独立董事	1	0		25042016	#N/A	0			25042016	#N/A	0			25042016	#N/A	0			25042016	#N/A	0			25042016	#N/A	0			25042016
2504	2018	25042018	广东省	广东	广东2018	2.56495	0.0175543	王德宏	25042018王德宏	独立董事	1		韩力伟	25042018韩力伟	非独立董事,副总经理	0		朱时均	25042018朱时均	独立董事	1	0	陈川	25042018陈川	独立董事	1	0	何天	25042018何天	非独立董事,副总经理	0			25042018	#N/A	0			25042018	#N/A	0			25042018	#N/A	0			25042018
2504	2019	25042019	广东省	广东	广东2019	2.77259	0.0140111	王德宏	25042019王德宏	独立董事	1		韩力伟	25042019韩力伟	非独立董事,副总经理	0		朱时均	25042019朱时均	独立董事	1	0	陈川	25042019陈川	独立董事	1	0	何天	25042019何天	非独立董事,副总经理	0			25042019	#N/A	0			25042019	#N/A	0			25042019	#N/A	0			25042019
2504	2020	25042020	广东省	广东	广东2020	2.83321	0.0174561	王德宏	25042020王德宏	独立董事	1		韩力伟	25042020韩力伟	非独立董事,副总经理	0		朱时均	25042020朱时均	独立董事	1	0	陈川	25042020陈川	独立董事	1	0	何天	25042020何天	非独立董事,副总经理	0			25042020	#N/A	0			25042020	#N/A	0			25042020	#N/A	0			25042020
2507	2013	25072013	上海市	上海	上海2013	0.693147	0.0166153	刘景伟	25072013刘景伟	独立董事	1		高大勇	25072013高大勇	独立董事	1	0	黄正坤	25072013黄正坤	董事,董事会秘书	0			25072013	#N/A	0			25072013	#N/A	0			25072013	#N/A	0			25072013	#N/A	0			25072013	#N/A	0			25072013
2507	2014	25072014	上海市	上海	上海2014	0.693147	0.0195843	李嘉明	25072014李嘉明	独立董事	1		王建新	25072014王建新	独立董事	1	0	黄正坤	25072014黄正坤	董事,董事会秘书	0			25072014	#N/A	0			25072014	#N/A	0			25072014	#N/A	0			25072014	#N/A	0			25072014	#N/A	0			25072014
2507	2018	25072018	重庆市	重庆	重庆2018	#N/A	0.0231558	王建新	25072018王建新	独立董事	1		王志勇	25072018王志勇	独立董事	1	0	赵平	25072018赵平	职工代表董事,总经理	0			25072018	#N/A	0			25072018	#N/A	0			25072018	#N/A	0			25072018	#N/A	0			25072018	#N/A	0			25072018
2508	2015	25082015	浙江省	浙江	浙江2015	0.693147	0.022429	董静	25082015董静	独立董事	1		张光杰	25082015张光杰	独立董事	1	0	任富佳	25082015任富佳	副董事长,总经理	0			25082015	#N/A	0			25082015	#N/A	0			25082015	#N/A	0			25082015	#N/A	0			25082015	#N/A	0			25082015
2508	2022	25082022	浙江省	浙江	浙江2022	9.81263	0.013772	陈元志	25082022陈元志	独立董事	1		何元福	25082022何元福	独立董事	1	0	任罗忠	25082022任罗忠	董事	0			25082022	#N/A	0			25082022	#N/A	0			25082022	#N/A	0			25082022	#N/A	0			25082022	#N/A	0			25082022
2508	2023	25082023	浙江省	浙江	浙江2023	9.74326	#N/A	陈元志	25082023陈元志	独立董事	1		何元福	25082023何元福	独立董事	1	0	任罗忠	25082023任罗忠	董事,监事会主席,非职工代表监事	0			25082023	#N/A	0			25082023	#N/A	0			25082023	#N/A	0			25082023	#N/A	0			25082023	#N/A	0			25082023
2510	2011	25102011	浙江省	浙江	浙江2011	#N/A	0.0219653	任伟	25102011任伟	董事,董事会秘书	0		刘志远	25102011刘志远	独立董事	1	0	邢国友	25102011邢国友	独立董事	1	0		25102011	#N/A	0			25102011	#N/A	0			25102011	#N/A	0			25102011	#N/A	0			25102011	#N/A	0			25102011
2510	2014	25102014	浙江省	浙江	浙江2014	#N/A	0.0278689	任伟	25102014任伟	董事,董事会秘书	0		张俊民	25102014张俊民	独立董事	1	0	田昆如	25102014田昆如	独立董事	1	0		25102014	#N/A	0			25102014	#N/A	0			25102014	#N/A	0			25102014	#N/A	0			25102014	#N/A	0			25102014
2510	2016	25102016	浙江省	浙江	浙江2016	1.09861	0.026311	任伟	25102016任伟	董事,董事会秘书	0		张俊民	25102016张俊民	独立董事	1	0	田昆如	25102016田昆如	独立董事	1	0		25102016	#N/A	0			25102016	#N/A	0			25102016	#N/A	0			25102016	#N/A	0			25102016	#N/A	0			25102016
2510	2017	25102017	浙江省	浙江	浙江2017	1.09861	0.0181469	张义生	25102017张义生	董事,副总经理	0		张俊民	25102017张俊民	独立董事	1	0	田昆如	25102017田昆如	独立董事	1	0		25102017	#N/A	0			25102017	#N/A	0			25102017	#N/A	0			25102017	#N/A	0			25102017	#N/A	0			25102017
2510	2018	25102018	浙江省	浙江	浙江2018	1.79176	0.0193728	张义生	25102018张义生	董事,副总经理	0		张俊民	25102018张俊民	独立董事	1	0	田昆如	25102018田昆如	独立董事	1	0		25102018	#N/A	0			25102018	#N/A	0			25102018	#N/A	0			25102018	#N/A	0			25102018	#N/A	0			25102018
2515	2019	25152019	广东省	广东	广东2019	2.77259	0.0140111	夏祖兴	25152019夏祖兴	独立董事	1		徐杰震	25152019徐杰震	独立董事	1	0	薛长煌	25152019薛长煌	副董事长	0			25152019	#N/A	0			25152019	#N/A	0			25152019	#N/A	0			25152019	#N/A	0			25152019	#N/A	0			25152019
2516	2015	25162015	广东省	广东	广东2015	0.693147	0.0185536	陈志斌	25162015陈志斌	独立董事	1		许建国	25162015许建国	董事	0		刘榕	25162015刘榕	独立董事	1	0		25162015	#N/A	0			25162015	#N/A	0			25162015	#N/A	0			25162015	#N/A	0			25162015	#N/A	0			25162015
2516	2023	25162023	广东省	广东	广东2023	9.88283	#N/A	陈乐乐	25162023陈乐乐	董事,财务负责人	0		王兵1	25162023王兵1	独立董事	1	0	陈乐乐	25162023陈乐乐	董事,财务负责人	0			25162023	#N/A	0			25162023	#N/A	0			25162023	#N/A	0			25162023	#N/A	0			25162023	#N/A	0			25162023
2518	2012	25182012	福建省	福建	福建2012	#N/A	0.0174656	张锦慧	25182012张锦慧	独立董事	1		刘玲	25182012刘玲	董事,公共事务总监	0		沈维涛	25182012沈维涛	独立董事	1	1		25182012	#N/A	0			25182012	#N/A	0			25182012	#N/A	0			25182012	#N/A	0			25182012	#N/A	0			25182012
2519	2010	25192010	福建省	福建	福建2010	#N/A	0.0155004		25192010	#N/A	0			25192010	#N/A	0			25192010	#N/A	0			25192010	#N/A	0			25192010	#N/A	0			25192010	#N/A	0			25192010	#N/A	0			25192010	#N/A	0			25192010
2519	2011	25192011	福建省	福建	福建2011	0.693147	0.0172949		25192011	#N/A	0			25192011	#N/A	0			25192011	#N/A	0			25192011	#N/A	0			25192011	#N/A	0			25192011	#N/A	0			25192011	#N/A	0			25192011	#N/A	0			25192011
2519	2013	25192013	福建省	福建	福建2013	#N/A	0.0214459	于北方	25192013于北方	独立董事	1		黄雄	25192013黄雄	独立董事	1	0	顾革新	25192013顾革新	董事	0			25192013	#N/A	0			25192013	#N/A	0			25192013	#N/A	0			25192013	#N/A	0			25192013	#N/A	0			25192013
2519	2014	25192014	福建省	福建	福建2014	#N/A	0.0233178	于北方	25192014于北方	独立董事	1		黄雄	25192014黄雄	独立董事	1	0	顾革新	25192014顾革新	董事	0			25192014	#N/A	0			25192014	#N/A	0			25192014	#N/A	0			25192014	#N/A	0			25192014	#N/A	0			25192014
2521	2013	25212013	福建省	福建	福建2013	#N/A	0.0214459	侯本领	25212013侯本领	独立董事	1		路清	25212013路清	独立董事	1	0	张祥增	25212013张祥增	董事	0			25212013	#N/A	0			25212013	#N/A	0			25212013	#N/A	0			25212013	#N/A	0			25212013	#N/A	0			25212013
2521	2014	25212014	福建省	福建	福建2014	#N/A	0.0233178	侯本领	25212014侯本领	独立董事	1		路清	25212014路清	独立董事	1	0	李文海	25212014李文海	董事,副总经理	0			25212014	#N/A	0			25212014	#N/A	0			25212014	#N/A	0			25212014	#N/A	0			25212014	#N/A	0			25212014
2521	2022	25212022	福建省	福建	福建2022	8.42858	0.0129832	宫本高	25212022宫本高	独立董事	1		李安东	25212022李安东	董事,总经理	0		王新	25212022王新	独立董事	1	0		25212022	#N/A	0			25212022	#N/A	0			25212022	#N/A	0			25212022	#N/A	0			25212022	#N/A	0			25212022
2521	2023	25212023	福建省	福建	福建2023	8.43229	#N/A	李安东	25212023李安东	董事,总经理	0		宫本高	25212023宫本高	独立董事	1	0	王新	25212023王新	独立董事	1	1		25212023	#N/A	0			25212023	#N/A	0			25212023	#N/A	0			25212023	#N/A	0			25212023	#N/A	0			25212023
2522	2013	25222013	福建省	福建	福建2013	#N/A	0.0214459	龚伯勇	25222013龚伯勇	独立董事	1		陈健	25222013陈健	董事,常务副总经理	0		王健	25222013王健	独立董事	1	0		25222013	#N/A	0			25222013	#N/A	0			25222013	#N/A	0			25222013	#N/A	0			25222013	#N/A	0			25222013
2522	2014	25222014	福建省	福建	福建2014	#N/A	0.0233178	龚伯勇	25222014龚伯勇	独立董事	1		陈健	25222014陈健	董事,常务副总经理	0		王健	25222014王健	独立董事	1	0		25222014	#N/A	0			25222014	#N/A	0			25222014	#N/A	0			25222014	#N/A	0			25222014	#N/A	0			25222014
2522	2015	25222015	福建省	福建	福建2015	1.38629	0.0206139	龚伯勇	25222015龚伯勇	独立董事	1		陈健	25222015陈健	董事长,总经理	0		王健	25222015王健	独立董事	1	0		25222015	#N/A	0			25222015	#N/A	0			25222015	#N/A	0			25222015	#N/A	0			25222015	#N/A	0			25222015
2522	2022	25222022	福建省	福建	福建2022	8.42858	0.0129832	徐伟箭	25222022徐伟箭	独立董事	1		汪萍	25222022汪萍	独立董事	1	0	杨家军	25222022杨家军	非独立董事,副总经理	0			25222022	#N/A	0			25222022	#N/A	0			25222022	#N/A	0			25222022	#N/A	0			25222022	#N/A	0			25222022
2523	2010	25232010	福建省	福建	福建2010	#N/A	0.0155004		25232010	#N/A	0			25232010	#N/A	0			25232010	#N/A	0			25232010	#N/A	0			25232010	#N/A	0			25232010	#N/A	0			25232010	#N/A	0			25232010	#N/A	0			25232010
2524	2017	25242017	湖南省	湖南	湖南2017	3.71357	0.0163375	单喆慜	25242017单喆慜	独立董事	1		周永麟	25242017周永麟	董事长,总经理,董事会秘书	0		马新智	25242017马新智	独立董事	1	0	车汉澍	25242017车汉澍	董事	0		杨之曙	25242017杨之曙	独立董事	1	0		25242017	#N/A	0			25242017	#N/A	0			25242017	#N/A	0			25242017
2526	2010	25262010	湖南省	湖南	湖南2010	#N/A	0.0174859		25262010	#N/A	0			25262010	#N/A	0			25262010	#N/A	0			25262010	#N/A	0			25262010	#N/A	0			25262010	#N/A	0			25262010	#N/A	0			25262010	#N/A	0			25262010
2527	2015	25272015	上海市	上海	上海2015	1.79176	0.0159259	原红旗	25272015原红旗	独立董事	1		王众	25272015王众	独立董事	1	0	蔡亮	25272015蔡亮	董事,常务副总经理,副总经理	0			25272015	#N/A	0			25272015	#N/A	0			25272015	#N/A	0			25272015	#N/A	0			25272015	#N/A	0			25272015
2531	2010	25312010	福建省	福建	福建2010	#N/A	0.0155004		25312010	#N/A	0			25312010	#N/A	0			25312010	#N/A	0			25312010	#N/A	0			25312010	#N/A	0			25312010	#N/A	0			25312010	#N/A	0			25312010	#N/A	0			25312010
2531	2014	25312014	福建省	福建	福建2014	#N/A	0.0233178	耿建涛	25312014耿建涛	独立董事	1		龚涛	25312014龚涛	董事,副总经理	0		徐劲科	25312014徐劲科	独立董事	1	0		25312014	#N/A	0			25312014	#N/A	0			25312014	#N/A	0			25312014	#N/A	0			25312014	#N/A	0			25312014
2532	2017	25322017	江苏省	江苏	江苏2017	2.48491	0.0210849	钟永成	25322017钟永成	独立董事	1		甘为民	25322017甘为民	独立董事	1	0	严先发	25322017严先发	董事,董事会秘书,副总经理	0			25322017	#N/A	0			25322017	#N/A	0			25322017	#N/A	0			25322017	#N/A	0			25322017	#N/A	0			25322017
2532	2018	25322018	江苏省	江苏	江苏2018	2.56495	0.0202007	周岳江	25322018周岳江	独立董事	1		甘为民	25322018甘为民	独立董事	1	0	严先发	25322018严先发	董事,董事会秘书	0			25322018	#N/A	0			25322018	#N/A	0			25322018	#N/A	0			25322018	#N/A	0			25322018	#N/A	0			25322018
2535	2012	25352012	河南省	河南	河南2012	0.693147	0.0120192	马跃勇	25352012马跃勇	独立董事	1		宋绪钦	25352012宋绪钦	独立董事	1	0	韩录云	25352012韩录云	董事	0			25352012	#N/A	0			25352012	#N/A	0			25352012	#N/A	0			25352012	#N/A	0			25352012	#N/A	0			25352012
2535	2013	25352013	河南省	河南	河南2013	1.79176	0.0150365	马跃勇	25352013马跃勇	独立董事	1		宋绪钦	25352013宋绪钦	独立董事	1	0	韩录云	25352013韩录云	董事	0			25352013	#N/A	0			25352013	#N/A	0			25352013	#N/A	0			25352013	#N/A	0			25352013	#N/A	0			25352013
2535	2014	25352014	河南省	河南	河南2014	2.3979	0.0182527	朱小平	25352014朱小平	独立董事	1		宋绪钦	25352014宋绪钦	独立董事	1	0	韩录云	25352014韩录云	董事	0			25352014	#N/A	0			25352014	#N/A	0			25352014	#N/A	0			25352014	#N/A	0			25352014	#N/A	0			25352014
2535	2017	25352017	河南省	河南	河南2017	3.4012	0.0197107	朱小平	25352017朱小平	独立董事	1		张复生	25352017张复生	独立董事	1	0	韩录云	25352017韩录云	董事	0			25352017	#N/A	0			25352017	#N/A	0			25352017	#N/A	0			25352017	#N/A	0			25352017	#N/A	0			25352017
2535	2018	25352018	河南省	河南	河南2018	4.46591	0.0189316	张复生	25352018张复生	独立董事	1		李伟真	25352018李伟真	独立董事	1	0	韩录云	25352018韩录云	董事	0			25352018	#N/A	0			25352018	#N/A	0			25352018	#N/A	0			25352018	#N/A	0			25352018	#N/A	0			25352018
2535	2019	25352019	河南省	河南	河南2019	4.89784	0.0185283	张复生	25352019张复生	独立董事	1		李伟真	25352019李伟真	独立董事	1	0	韩录云	25352019韩录云	董事	0			25352019	#N/A	0			25352019	#N/A	0			25352019	#N/A	0			25352019	#N/A	0			25352019	#N/A	0			25352019
2537	2011	25372011	河南省	河南	河南2011	#N/A	0.01806	陈岗	25372011陈岗	独立董事	1		顾弘光	25372011顾弘光	独立董事	1	0	张世玉	25372011张世玉	董事	0			25372011	#N/A	0			25372011	#N/A	0			25372011	#N/A	0			25372011	#N/A	0			25372011	#N/A	0			25372011
2538	2019	25382019	山东省	山东	山东2019	3.21888	0.0146235	袁天荣	25382019袁天荣	独立董事	1		张晓峰	25382019张晓峰	董事	0		方君	25382019方君	董事,副总经理,财务总监,董事会秘书	0		顾海英	25382019顾海英	独立董事	1	0	孙素明	25382019孙素明	独立董事	1	0		25382019	#N/A	0			25382019	#N/A	0			25382019	#N/A	0			25382019
2538	2020	25382020	山东省	山东	山东2020	3.49651	0.0128581	顾海英	25382020顾海英	独立董事	1		罗忆松	25382020罗忆松	独立董事	1	1	朱国全	25382020朱国全	董事	0			25382020	#N/A	0			25382020	#N/A	0			25382020	#N/A	0			25382020	#N/A	0			25382020	#N/A	0			25382020
2538	2023	25382023	山东省	山东	山东2023	9.13669	#N/A	吴玉光	25382023吴玉光	独立董事	1		朱国全	25382023朱国全	董事长,董事	0		袁天荣	25382023袁天荣	独立董事	1	1		25382023	#N/A	0			25382023	#N/A	0			25382023	#N/A	0			25382023	#N/A	0			25382023	#N/A	0			25382023
2543	2016	25432016	广东省	广东	广东2016	1.94591	0.0237664	何夏蓓	25432016何夏蓓	独立董事	1		王玮	25432016王玮	独立董事	1	0	卢楚隆	25432016卢楚隆	副董事长	0			25432016	#N/A	0			25432016	#N/A	0			25432016	#N/A	0			25432016	#N/A	0			25432016	#N/A	0			25432016
2544	2018	25442018	广东省	广东	广东2018	2.56495	0.0175543	卢锐	25442018卢锐	独立董事	1	1		25442018	#N/A	0		王小明	25442018王小明	董事	0		刘汝林	25442018刘汝林	独立董事	1	0	陈学道	25442018陈学道	独立董事	1	0		25442018	#N/A	0			25442018	#N/A	0			25442018	#N/A	0			25442018
2544	2019	25442019	广东省	广东	广东2019	2.77259	0.0140111	唐清泉	25442019唐清泉	独立董事	1		闵洁	25442019闵洁	董事	0		马作武	25442019马作武	独立董事	1	0	萧端	25442019萧端	独立董事	1	0	杨新	25442019杨新	副董事长	0			25442019	#N/A	0			25442019	#N/A	0			25442019	#N/A	0			25442019
2544	2020	25442020	广东省	广东	广东2020	2.83321	0.0174561	唐清泉	25442020唐清泉	独立董事	1		闵洁	25442020闵洁	#N/A	0		马作武	25442020马作武	独立董事	1	0	萧端	25442020萧端	独立董事	1	0	杨新	25442020杨新	副董事长	0			25442020	#N/A	0			25442020	#N/A	0			25442020	#N/A	0			25442020
2546	2015	25462015	山东省	山东	山东2015	4.15888	0.0157355	周定华	25462015周定华	独立董事	1		顾自立	25462015顾自立	独立董事	1	0	李照球	25462015李照球	董事,副总经理	0			25462015	#N/A	0			25462015	#N/A	0			25462015	#N/A	0			25462015	#N/A	0			25462015	#N/A	0			25462015
2546	2016	25462016	山东省	山东	山东2016	#N/A	0.0178275	周定华	25462016周定华	独立董事	1			25462016	#N/A	0		李照球	25462016李照球	董事,总经理	0			25462016	#N/A	0			25462016	#N/A	0			25462016	#N/A	0			25462016	#N/A	0			25462016	#N/A	0			25462016
2546	2017	25462017	山东省	山东	山东2017	2.07944	0.0146452	李云彬	25462017李云彬	独立董事	1		周定华	25462017周定华	独立董事	1	0	金放生	25462017金放生	副董事长	0			25462017	#N/A	0			25462017	#N/A	0			25462017	#N/A	0			25462017	#N/A	0			25462017	#N/A	0			25462017
2546	2019	25462019	山东省	山东	山东2019	3.21888	0.0146235	李云彬	25462019李云彬	独立董事	1		周定华	25462019周定华	独立董事	1	0	金放生	25462019金放生	副董事长	0			25462019	#N/A	0			25462019	#N/A	0			25462019	#N/A	0			25462019	#N/A	0			25462019	#N/A	0			25462019
2546	2020	25462020	山东省	山东	山东2020	3.49651	0.0128581	李云彬	25462020李云彬	独立董事	1		周定华	25462020周定华	独立董事	1	0	金放生	25462020金放生	副董事长	0			25462020	#N/A	0			25462020	#N/A	0			25462020	#N/A	0			25462020	#N/A	0			25462020	#N/A	0			25462020
2546	2023	25462023	山东省	山东	山东2023	9.13669	#N/A	都晓芳	25462023都晓芳	独立董事	1		李照球	25462023李照球	董事,副总经理	0		李正飞	25462023李正飞	独立董事	1	0		25462023	#N/A	0			25462023	#N/A	0			25462023	#N/A	0			25462023	#N/A	0			25462023	#N/A	0			25462023
2547	2016	25472016	山东省	山东	山东2016	#N/A	0.0178275	周中胜	25472016周中胜	独立董事	1		郑海艳	25472016郑海艳	董事	0		方军雄	25472016方军雄	独立董事	1	0		25472016	#N/A	0			25472016	#N/A	0			25472016	#N/A	0			25472016	#N/A	0			25472016	#N/A	0			25472016
2547	2018	25472018	山东省	山东	山东2018	2.3979	0.0165044	方军雄	25472018方军雄	独立董事	1		陆文龙	25472018陆文龙	独立董事	1	0	荣志坚	25472018荣志坚	非独立董事	0			25472018	#N/A	0			25472018	#N/A	0			25472018	#N/A	0			25472018	#N/A	0			25472018	#N/A	0			25472018
2548	2014	25482014	广东省	广东	广东2014	#N/A	0.0224623	李斌	25482014李斌	独立董事	1		佟景国	25482014佟景国	独立董事	1	0	关明阳	25482014关明阳	董事	0			25482014	#N/A	0			25482014	#N/A	0			25482014	#N/A	0			25482014	#N/A	0			25482014	#N/A	0			25482014
2549	2011	25492011	广东省	广东	广东2011	#N/A	0.0199093	李一鸣	25492011李一鸣	独立董事	1		周岳陵	25492011周岳陵	董事	0		陈步宁	25492011陈步宁	独立董事	1	1		25492011	#N/A	0			25492011	#N/A	0			25492011	#N/A	0			25492011	#N/A	0			25492011	#N/A	0			25492011
2549	2017	25492017	广东省	广东	广东2017	2.70805	0.0163228	常启军	25492017常启军	独立董事	1		周岳陵	25492017周岳陵	董事	0		廖安	25492017廖安	#N/A	0			25492017	#N/A	0			25492017	#N/A	0			25492017	#N/A	0			25492017	#N/A	0			25492017	#N/A	0			25492017
2550	2015	25502015	广东省	广东	广东2015	0.693147	0.0185536	荣幸华	25502015荣幸华	独立董事	1		张继稳	25502015张继稳	独立董事	1	0	赵刚	25502015赵刚	副董事长,总经理	0			25502015	#N/A	0			25502015	#N/A	0			25502015	#N/A	0			25502015	#N/A	0			25502015	#N/A	0			25502015
2550	2018	25502018	广东省	广东	广东2018	2.56495	0.0175543	张继稳	25502018张继稳	独立董事	1		王轲	25502018王轲	董事,总经理	0		荣幸华	25502018荣幸华	独立董事	1	1		25502018	#N/A	0			25502018	#N/A	0			25502018	#N/A	0			25502018	#N/A	0			25502018	#N/A	0			25502018
2550	2020	25502020	广东省	广东	广东2020	2.83321	0.0174561	张继稳	25502020张继稳	独立董事	1		王轲	25502020王轲	董事,总经理	0		荣幸华	25502020荣幸华	独立董事	1	0		25502020	#N/A	0			25502020	#N/A	0			25502020	#N/A	0			25502020	#N/A	0			25502020	#N/A	0			25502020
2551	2023	25512023	广东省	广东	广东2023	9.88283	#N/A	虞熙春	25512023虞熙春	非独立董事	0		曾江虹	25512023曾江虹	外部董事	0		刘卫兵	25512023刘卫兵	独立董事	1	0		25512023	#N/A	0			25512023	#N/A	0			25512023	#N/A	0			25512023	#N/A	0			25512023	#N/A	0			25512023
2552	2015	25522015	广东省	广东	广东2015	0.693147	0.0185536	朱丽霞	25522015朱丽霞	副董事长,总经理	0		辛金国	25522015辛金国	独立董事	1	0	朱杭	25522015朱杭	独立董事	1	0		25522015	#N/A	0			25522015	#N/A	0			25522015	#N/A	0			25522015	#N/A	0			25522015	#N/A	0			25522015
2554	2017	25542017	广东省	广东	广东2017	2.70805	0.0163228	黄松	25542017黄松	董事长	0		李悦	25542017李悦	独立董事	1	0	罗炜	25542017罗炜	独立董事	1	0		25542017	#N/A	0			25542017	#N/A	0			25542017	#N/A	0			25542017	#N/A	0			25542017	#N/A	0			25542017
2554	2023	25542023	广东省	广东	广东2023	9.88283	#N/A	文斌	25542023文斌	非独立董事	0		崔松鹤	25542023崔松鹤	独立董事	1	0	董秀成	25542023董秀成	独立董事	1	0		25542023	#N/A	0			25542023	#N/A	0			25542023	#N/A	0			25542023	#N/A	0			25542023	#N/A	0			25542023
2555	2018	25552018	安徽省	安徽	安徽2018	2.3979	0.0204296	吴卫红	25552018吴卫红	董事	0		陈建林	25552018陈建林	独立董事	1	0	朱宁	25552018朱宁	独立董事	1	0		25552018	#N/A	0			25552018	#N/A	0			25552018	#N/A	0			25552018	#N/A	0			25552018	#N/A	0			25552018
2556	2012	25562012	安徽省	安徽	安徽2012	1.60944	0.0183712	赵惠芳	25562012赵惠芳	独立董事	1		马长安	25562012马长安	独立董事	1	0	孙红星	25562012孙红星	董事	0			25562012	#N/A	0			25562012	#N/A	0			25562012	#N/A	0			25562012	#N/A	0			25562012	#N/A	0			25562012
2556	2013	25562013	安徽省	安徽	安徽2013	0.693147	0.0172233	赵惠芳	25562013赵惠芳	独立董事	1		马长安	25562013马长安	独立董事	1	0	孙红星	25562013孙红星	董事	0			25562013	#N/A	0			25562013	#N/A	0			25562013	#N/A	0			25562013	#N/A	0			25562013	#N/A	0			25562013
2558	2012	25582012	安徽省	安徽	安徽2012	1.60944	0.0183712		25582012	#N/A	0			25582012	#N/A	0			25582012	#N/A	0			25582012	#N/A	0			25582012	#N/A	0			25582012	#N/A	0			25582012	#N/A	0			25582012	#N/A	0			25582012
2558	2013	25582013	安徽省	安徽	安徽2013	0.693147	0.0172233	章新蓉	25582013章新蓉	独立董事	1		彭建虎	25582013彭建虎	董事长,总经理	0		程源伟	25582013程源伟	独立董事	1	0		25582013	#N/A	0			25582013	#N/A	0			25582013	#N/A	0			25582013	#N/A	0			25582013	#N/A	0			25582013
2562	2020	25622020	河南省	河南	河南2020	5.15329	0.020523	褚国弟	25622020褚国弟	独立董事	1		顾菊英	25622020顾菊英	独立董事	1	0	钱志达	25622020钱志达	董事长,总经理	0			25622020	#N/A	0			25622020	#N/A	0			25622020	#N/A	0			25622020	#N/A	0			25622020	#N/A	0			25622020
2563	2014	25632014	浙江省	浙江	浙江2014	#N/A	0.0278689	周平凡	25632014周平凡	董事,事业部总经理,总裁	0		郭建南	25632014郭建南	独立董事	1	0	谢获宝	25632014谢获宝	独立董事	1	0		25632014	#N/A	0			25632014	#N/A	0			25632014	#N/A	0			25632014	#N/A	0			25632014	#N/A	0			25632014
2563	2023	25632023	浙江省	浙江	浙江2023	9.74326	#N/A	周平凡	25632023周平凡	副董事长	0		蔡丽玲	25632023蔡丽玲	独立董事	1	0	苏文兵	25632023苏文兵	独立董事	1	1		25632023	#N/A	0			25632023	#N/A	0			25632023	#N/A	0			25632023	#N/A	0			25632023	#N/A	0			25632023
2565	2012	25652012	浙江省	浙江	浙江2012	#N/A	0.019422	苟兴羽	25652012苟兴羽	独立董事	1		刘炜	25652012刘炜	董事,副总裁,财务总监	0		姚长辉	25652012姚长辉	独立董事	1	0		25652012	#N/A	0			25652012	#N/A	0			25652012	#N/A	0			25652012	#N/A	0			25652012	#N/A	0			25652012
2566	2017	25662017	浙江省	浙江	浙江2017	1.09861	0.0181469	吕桂霞	25662017吕桂霞	独立董事	1		毕焱	25662017毕焱	独立董事	1	0	梁志齐	25662017梁志齐	非独立董事	0			25662017	#N/A	0			25662017	#N/A	0			25662017	#N/A	0			25662017	#N/A	0			25662017	#N/A	0			25662017
2566	2022	25662022	浙江省	浙江	浙江2022	9.81263	0.013772	李明	25662022李明	独立董事	1		孙立荣	25662022孙立荣	独立董事	1	0	王贺	25662022王贺	非独立董事	0			25662022	#N/A	0			25662022	#N/A	0			25662022	#N/A	0			25662022	#N/A	0			25662022	#N/A	0			25662022
2567	2015	25672015	湖南省	湖南	湖南2015	1.09861	0.0212538	何红渠	25672015何红渠	独立董事	1	1	罗光辉	25672015罗光辉	独立董事	1	0	郭拥华	25672015郭拥华	董事,副总经理	0			25672015	#N/A	0			25672015	#N/A	0			25672015	#N/A	0			25672015	#N/A	0			25672015	#N/A	0			25672015
2567	2016	25672016	湖南省	湖南	湖南2016	2.3979	0.0200848	张少球	25672016张少球	独立董事	1		陶业	25672016陶业	董事,副总经理	0		江帆	25672016江帆	独立董事	1	0		25672016	#N/A	0			25672016	#N/A	0			25672016	#N/A	0			25672016	#N/A	0			25672016	#N/A	0			25672016
2568	2022	25682022	上海市	上海	上海2022	7.8736	0.014652	潘煜	25682022潘煜	独立董事	1		高原	25682022高原	董事	0		张晓荣	25682022张晓荣	独立董事	1	0		25682022	#N/A	0			25682022	#N/A	0			25682022	#N/A	0			25682022	#N/A	0			25682022	#N/A	0			25682022
2568	2023	25682023	上海市	上海	上海2023	7.74889	#N/A	潘煜	25682023潘煜	独立董事	1		高原	25682023高原	董事	0		张晓荣	25682023张晓荣	独立董事	1	0		25682023	#N/A	0			25682023	#N/A	0			25682023	#N/A	0			25682023	#N/A	0			25682023	#N/A	0			25682023
2570	2015	25702015	浙江省	浙江	浙江2015	0.693147	0.022429	林必清	25702015林必清	董事	0		朱晓静	25702015朱晓静	董事	0		史惠祥	25702015史惠祥	独立董事	1	1	刘晓松	25702015刘晓松	独立董事	1	1	于宁	25702015于宁	独立董事	1	0		25702015	#N/A	0			25702015	#N/A	0			25702015	#N/A	0			25702015
2570	2016	25702016	浙江省	浙江	浙江2016	1.09861	0.026311	林必清	25702016林必清	董事	0		朱晓静	25702016朱晓静	董事	0		史惠祥	25702016史惠祥	独立董事	1	1	刘晓松	25702016刘晓松	独立董事	1	1	于宁	25702016于宁	独立董事	1	0		25702016	#N/A	0			25702016	#N/A	0			25702016	#N/A	0			25702016
2570	2022	25702022	浙江省	浙江	浙江2022	9.81263	0.013772	汪祥耀	25702022汪祥耀	独立董事	1		倪建林	25702022倪建林	独立董事	1	0	张洲峰	25702022张洲峰	副董事长	0			25702022	#N/A	0			25702022	#N/A	0			25702022	#N/A	0			25702022	#N/A	0			25702022	#N/A	0			25702022
2570	2023	25702023	浙江省	浙江	浙江2023	9.74326	#N/A	汪祥耀	25702023汪祥耀	独立董事	1		倪建林	25702023倪建林	独立董事	1	0	张洲峰	25702023张洲峰	副董事长	0			25702023	#N/A	0			25702023	#N/A	0			25702023	#N/A	0			25702023	#N/A	0			25702023	#N/A	0			25702023
2573	2019	25732019	广东省	广东	广东2019	2.77259	0.0140111	张建平	25732019张建平	独立董事	1		肖遂宁	25732019肖遂宁	独立董事	1	0	张根华	25732019张根华	总经理,董事	0			25732019	#N/A	0			25732019	#N/A	0			25732019	#N/A	0			25732019	#N/A	0			25732019	#N/A	0			25732019
2573	2020	25732020	广东省	广东	广东2020	2.83321	0.0174561	张敏	25732020张敏	独立董事	1		王华	25732020王华	独立董事	1	0	刘朝安	25732020刘朝安	董事	0			25732020	#N/A	0			25732020	#N/A	0			25732020	#N/A	0			25732020	#N/A	0			25732020	#N/A	0			25732020
2574	2013	25742013	广东省	广东	广东2013	#N/A	0.0237707	周虹	25742013周虹	独立董事	1		徐小舸	25742013徐小舸	独立董事	1	1	尹尚良	25742013尹尚良	董事,副总经理	0			25742013	#N/A	0			25742013	#N/A	0			25742013	#N/A	0			25742013	#N/A	0			25742013	#N/A	0			25742013
2574	2017	25742017	广东省	广东	广东2017	2.70805	0.0163228	韩洪灵	25742017韩洪灵	独立董事	1		刘斐	25742017刘斐	独立董事	1	0	尹尚良	25742017尹尚良	董事,副总经理	0			25742017	#N/A	0			25742017	#N/A	0			25742017	#N/A	0			25742017	#N/A	0			25742017	#N/A	0			25742017
2575	2013	25752013	广东省	广东	广东2013	#N/A	0.0237707	蔡友杰	25752013蔡友杰	独立董事	1		王文璧	25752013王文璧	独立董事	1	0	黄仕群	25752013黄仕群	董事,总经理	0			25752013	#N/A	0			25752013	#N/A	0			25752013	#N/A	0			25752013	#N/A	0			25752013	#N/A	0			25752013
2575	2020	25752020	广东省	广东	广东2020	2.83321	0.0174561	潘秀玲	25752020潘秀玲	独立董事	1		韩正强	25752020韩正强	独立董事	1	0	王昊	25752020王昊	非独立董事,副总经理,总经理	0			25752020	#N/A	0			25752020	#N/A	0			25752020	#N/A	0			25752020	#N/A	0			25752020	#N/A	0			25752020
2577	2012	25772012	广东省	广东	广东2012	0.693147	0.0230561		25772012	#N/A	0			25772012	#N/A	0			25772012	#N/A	0			25772012	#N/A	0			25772012	#N/A	0			25772012	#N/A	0			25772012	#N/A	0			25772012	#N/A	0			25772012
2577	2017	25772017	广东省	广东	广东2017	2.70805	0.0163228	李勉	25772017李勉	独立董事	1		冯东	25772017冯东	独立董事	1	0	曾浩	25772017曾浩	董事长,总经理	0			25772017	#N/A	0			25772017	#N/A	0			25772017	#N/A	0			25772017	#N/A	0			25772017	#N/A	0			25772017
2578	2017	25782017	福建省	福建	福建2017	1.94591	0.0220731	陈金龙	25782017陈金龙	独立董事	1		兰涛	25782017兰涛	独立董事	1	0	黄文乐	25782017黄文乐	董事	0			25782017	#N/A	0			25782017	#N/A	0			25782017	#N/A	0			25782017	#N/A	0			25782017	#N/A	0			25782017
2578	2018	25782018	福建省	福建	福建2018	2.3979	0.0239449	陈金龙	25782018陈金龙	独立董事	1		兰涛	25782018兰涛	独立董事	1	0	黄文乐	25782018黄文乐	董事	0			25782018	#N/A	0			25782018	#N/A	0			25782018	#N/A	0			25782018	#N/A	0			25782018	#N/A	0			25782018
2578	2019	25782019	福建省	福建	福建2019	3.13549	0.0220985	陈金龙	25782019陈金龙	独立董事	1		兰涛	25782019兰涛	独立董事	1	0	黄文乐	25782019黄文乐	董事	0			25782019	#N/A	0			25782019	#N/A	0			25782019	#N/A	0			25782019	#N/A	0			25782019	#N/A	0			25782019
2578	2020	25782020	福建省	福建	福建2020	2.63906	0.0207933	陈金龙	25782020陈金龙	独立董事	1		涂书田	25782020涂书田	独立董事	1	0	张宇宏	25782020张宇宏	董事	0			25782020	#N/A	0			25782020	#N/A	0			25782020	#N/A	0			25782020	#N/A	0			25782020	#N/A	0			25782020
2580	2012	25802012	福建省	福建	福建2012	#N/A	0.0174656		25802012	#N/A	0			25802012	#N/A	0			25802012	#N/A	0			25802012	#N/A	0			25802012	#N/A	0			25802012	#N/A	0			25802012	#N/A	0			25802012	#N/A	0			25802012
2580	2016	25802016	福建省	福建	福建2016	#N/A	0.0241498	宋希亮	25802016宋希亮	独立董事	1		李广源	25802016李广源	独立董事	1	0	高运奎	25802016高运奎	副董事长,总经理,董事	0			25802016	#N/A	0			25802016	#N/A	0			25802016	#N/A	0			25802016	#N/A	0			25802016	#N/A	0			25802016
2580	2017	25802017	福建省	福建	福建2017	1.94591	0.0220731	宋希亮	25802017宋希亮	独立董事	1		梁仕念	25802017梁仕念	独立董事	1	0	宋斌	25802017宋斌	董事长	0			25802017	#N/A	0			25802017	#N/A	0			25802017	#N/A	0			25802017	#N/A	0			25802017	#N/A	0			25802017
2580	2018	25802018	福建省	福建	福建2018	2.3979	0.0239449	宋希亮	25802018宋希亮	独立董事	1		梁仕念	25802018梁仕念	独立董事	1	0	宋斌	25802018宋斌	董事长,总经理	0			25802018	#N/A	0			25802018	#N/A	0			25802018	#N/A	0			25802018	#N/A	0			25802018	#N/A	0			25802018
2580	2022	25802022	福建省	福建	福建2022	8.42858	0.0129832	马涛	25802022马涛	独立董事	1		王亚斌	25802022王亚斌	非独立董事	0		梁仕念	25802022梁仕念	独立董事	1	0		25802022	#N/A	0			25802022	#N/A	0			25802022	#N/A	0			25802022	#N/A	0			25802022	#N/A	0			25802022
2582	2013	25822013	河南省	河南	河南2013	1.79176	0.0150365	谷秀娟	25822013谷秀娟	独立董事	1		朱舫	25822013朱舫	独立董事	1	0	李守宇	25822013李守宇	副董事长	0			25822013	#N/A	0			25822013	#N/A	0			25822013	#N/A	0			25822013	#N/A	0			25822013	#N/A	0			25822013
2582	2017	25822017	河南省	河南	河南2017	3.4012	0.0197107	毕会静	25822017毕会静	独立董事	1		朱舫	25822017朱舫	独立董事	1	0	齐金勃	25822017齐金勃	董事	0			25822017	#N/A	0			25822017	#N/A	0			25822017	#N/A	0			25822017	#N/A	0			25822017	#N/A	0			25822017
2582	2019	25822019	河南省	河南	河南2019	4.89784	0.0185283	毕会静	25822019毕会静	独立董事	1		石聚领	25822019石聚领	董事,副总经理	0		齐金勃	25822019齐金勃	独立董事	1	0		25822019	#N/A	0			25822019	#N/A	0			25822019	#N/A	0			25822019	#N/A	0			25822019	#N/A	0			25822019
2582	2020	25822020	河南省	河南	河南2020	5.15329	0.020523	毕会静	25822020毕会静	独立董事	1		石聚领	25822020石聚领	董事,副总经理	0		齐金勃	25822020齐金勃	独立董事	1	0		25822020	#N/A	0			25822020	#N/A	0			25822020	#N/A	0			25822020	#N/A	0			25822020	#N/A	0			25822020
2584	2017	25842017	广东省	广东	广东2017	2.70805	0.0163228	卢锐	25842017卢锐	独立董事	1	1	陈水挟	25842017陈水挟	独立董事	1	0	黄侦杰	25842017黄侦杰	董事,副总裁	0			25842017	#N/A	0			25842017	#N/A	0			25842017	#N/A	0			25842017	#N/A	0			25842017	#N/A	0			25842017
2584	2018	25842018	广东省	广东	广东2018	2.56495	0.0175543	卢锐	25842018卢锐	独立董事	1	1	陈水挟	25842018陈水挟	独立董事	1	0	黄侦杰	25842018黄侦杰	董事,副总裁	0			25842018	#N/A	0			25842018	#N/A	0			25842018	#N/A	0			25842018	#N/A	0			25842018	#N/A	0			25842018
2584	2019	25842019	广东省	广东	广东2019	2.77259	0.0140111	卢锐	25842019卢锐	独立董事	1	1	陈水挟	25842019陈水挟	独立董事	1	0	黄侦杰	25842019黄侦杰	董事,副总裁	0			25842019	#N/A	0			25842019	#N/A	0			25842019	#N/A	0			25842019	#N/A	0			25842019	#N/A	0			25842019
2584	2020	25842020	广东省	广东	广东2020	2.83321	0.0174561	刘伟	25842020刘伟	独立董事	1		陈水挟	25842020陈水挟	独立董事	1	0	黄侦杰	25842020黄侦杰	董事,副总裁	0			25842020	#N/A	0			25842020	#N/A	0			25842020	#N/A	0			25842020	#N/A	0			25842020	#N/A	0			25842020
2584	2023	25842023	广东省	广东	广东2023	9.88283	#N/A	吴守富	25842023吴守富	独立董事	1		曾幸荣	25842023曾幸荣	独立董事	1	0	黄侦杰	25842023黄侦杰	董事,副总裁	0			25842023	#N/A	0			25842023	#N/A	0			25842023	#N/A	0			25842023	#N/A	0			25842023	#N/A	0			25842023
2585	2015	25852015	广东省	广东	广东2015	0.693147	0.0185536	吴培服	25852015吴培服	董事长,总经理	0		廖家河	25852015廖家河	独立董事	1	0	陈强	25852015陈强	独立董事	1	0	吕忆农	25852015吕忆农	独立董事	1	0	周海燕	25852015周海燕	董事,财务总监,副总经理	0			25852015	#N/A	0			25852015	#N/A	0			25852015	#N/A	0			25852015
2585	2016	25852016	广东省	广东	广东2016	1.94591	0.0237664	吴培服	25852016吴培服	董事长,总经理	0		蓝海林	25852016蓝海林	独立董事	1	0	程银春	25852016程银春	独立董事	1	0	李小虎	25852016李小虎	独立董事	1	0	周海燕	25852016周海燕	董事,财务总监,副总经理	0			25852016	#N/A	0			25852016	#N/A	0			25852016	#N/A	0			25852016
2585	2017	25852017	广东省	广东	广东2017	2.70805	0.0163228	吴培服	25852017吴培服	董事长,总经理	0		蓝海林	25852017蓝海林	独立董事	1	0	程银春	25852017程银春	独立董事	1	0	李小虎	25852017李小虎	独立董事	1	0	周海燕	25852017周海燕	董事,财务总监,副总经理	0			25852017	#N/A	0			25852017	#N/A	0			25852017	#N/A	0			25852017
2585	2018	25852018	广东省	广东	广东2018	2.56495	0.0175543	吴培服	25852018吴培服	董事长,总经理	0		蓝海林	25852018蓝海林	独立董事	1	0	程银春	25852018程银春	独立董事	1	0	李小虎	25852018李小虎	独立董事	1	0	周海燕	25852018周海燕	董事,财务总监,副总经理	0			25852018	#N/A	0			25852018	#N/A	0			25852018	#N/A	0			25852018
2587	2012	25872012	广东省	广东	广东2012	0.693147	0.0230561		25872012	#N/A	0			25872012	#N/A	0			25872012	#N/A	0			25872012	#N/A	0			25872012	#N/A	0			25872012	#N/A	0			25872012	#N/A	0			25872012	#N/A	0			25872012
2587	2015	25872015	广东省	广东	广东2015	0.693147	0.0185536	李华雄	25872015李华雄	独立董事	1		崔军	25872015崔军	独立董事	1	0	吴涵渠	25872015吴涵渠	董事长	0			25872015	#N/A	0			25872015	#N/A	0			25872015	#N/A	0			25872015	#N/A	0			25872015	#N/A	0			25872015
2591	2012	25912012	山东省	山东	山东2012	0.693147	0.0142408	郭华平	25912012郭华平	独立董事	1		王金本	25912012王金本	独立董事	1	0	李云龙	25912012李云龙	独立董事	1	0	胡恩雪	25912012胡恩雪	董事,总经理	0		傅哲宽	25912012傅哲宽	董事	0			25912012	#N/A	0			25912012	#N/A	0			25912012	#N/A	0			25912012
2591	2015	25912015	山东省	山东	山东2015	4.15888	0.0157355	王金本	25912015王金本	独立董事	1		郭华平	25912015郭华平	独立董事	1	0	李汉国	25912015李汉国	独立董事	1	0	胡恩雪	25912015胡恩雪	董事,总经理	0		周小根	25912015周小根	董事,副总经理	0			25912015	#N/A	0			25912015	#N/A	0			25912015	#N/A	0			25912015
2591	2017	25912017	山东省	山东	山东2017	2.07944	0.0146452	王金本	25912017王金本	独立董事	1			25912017	#N/A	0		李汉国	25912017李汉国	独立董事	1	0	胡恩雪	25912017胡恩雪	董事,总经理	0		周小根	25912017周小根	董事,副总经理	0			25912017	#N/A	0			25912017	#N/A	0			25912017	#N/A	0			25912017
2591	2023	25912023	山东省	山东	山东2023	9.13669	#N/A	胡大立	25912023胡大立	独立董事	1		施小龙	25912023施小龙	非独立董事,副总经理	0		刘萍	25912023刘萍	独立董事	1	0	胡恩雪	25912023胡恩雪	董事,总经理	0		于天宝	25912023于天宝	独立董事	1	0		25912023	#N/A	0			25912023	#N/A	0			25912023	#N/A	0			25912023
2593	2023	25932023	山东省	山东	山东2023	9.13669	#N/A	吴志良	25932023吴志良	董事,副总经理	0		何少平	25932023何少平	独立董事	1	0	黄健雄	25932023黄健雄	独立董事	1	0		25932023	#N/A	0			25932023	#N/A	0			25932023	#N/A	0			25932023	#N/A	0			25932023	#N/A	0			25932023
2597	2017	25972017	安徽省	安徽	安徽2017	3.43399	0.0173611	王玉春	25972017王玉春	独立董事	1		夏家信	25972017夏家信	非独立董事,总经理	0		杨乐	25972017杨乐	非独立董事,副董事长	0			25972017	#N/A	0			25972017	#N/A	0			25972017	#N/A	0			25972017	#N/A	0			25972017	#N/A	0			25972017
2597	2023	25972023	安徽省	安徽	安徽2023	9.15578	#N/A	储敏	25972023储敏	独立董事	1		胡晓明	25972023胡晓明	独立董事	1	0	夏家信	25972023夏家信	副董事长,总经理	0			25972023	#N/A	0			25972023	#N/A	0			25972023	#N/A	0			25972023	#N/A	0			25972023	#N/A	0			25972023
2598	2015	25982015	安徽省	安徽	安徽2015	1.60944	0.0166536	王爱国	25982015王爱国	独立董事	1		赵永瑞	25982015赵永瑞	独立董事	1	0	王崇璞	25982015王崇璞	董事,副总经理	0			25982015	#N/A	0			25982015	#N/A	0			25982015	#N/A	0			25982015	#N/A	0			25982015	#N/A	0			25982015
2598	2020	25982020	安徽省	安徽	安徽2020	4.69135	0.011744	张宏	25982020张宏	独立董事	1		王崇璞	25982020王崇璞	董事,副总经理	0		刘士华	25982020刘士华	董事,副总经理	0		董明晓	25982020董明晓	独立董事	1	0	徐波	25982020徐波	独立董事	1	0		25982020	#N/A	0			25982020	#N/A	0			25982020	#N/A	0			25982020
2599	2015	25992015	安徽省	安徽	安徽2015	1.60944	0.0166536	齐桂华	25992015齐桂华	独立董事	1		高成刚	25992015高成刚	独立董事	1	0	栗延秋	25992015栗延秋	总经理,副董事长	0			25992015	#N/A	0			25992015	#N/A	0			25992015	#N/A	0			25992015	#N/A	0			25992015	#N/A	0			25992015
2599	2019	25992019	安徽省	安徽	安徽2019	3.4012	0.0163229	蒋力	25992019蒋力	独立董事	1		马肖风	25992019马肖风	独立董事	1	0	蔡建军	25992019蔡建军	董事,副总经理	0			25992019	#N/A	0			25992019	#N/A	0			25992019	#N/A	0			25992019	#N/A	0			25992019	#N/A	0			25992019
2600	2023	26002023	广东省	广东	广东2023	9.88283	#N/A	李东方	26002023李东方	独立董事	1		蔡元庆	26002023蔡元庆	独立董事	1	0	刘健成	26002023刘健成	独立董事	1	0		26002023	#N/A	0			26002023	#N/A	0			26002023	#N/A	0			26002023	#N/A	0			26002023	#N/A	0			26002023
2603	2018	26032018	河北省	河北	河北2018	3.29584	0.0267334	王震	26032018王震	独立董事	1		季绍良	26032018季绍良	独立董事	1	0	戴奉祥	26032018戴奉祥	#N/A	0		赵韶华	26032018赵韶华	董事,副总经理	0			26032018	#N/A	0			26032018	#N/A	0			26032018	#N/A	0			26032018	#N/A	0			26032018
2604	2014	26042014	河北省	河北	河北2014	0.693147	0.025686	傅代国	26042014傅代国	独立董事	1		郑兴业	26042014郑兴业	独立董事	1	0	程少博	26042014程少博	董事长,总经理	0			26042014	#N/A	0			26042014	#N/A	0			26042014	#N/A	0			26042014	#N/A	0			26042014	#N/A	0			26042014
2605	2020	26052020	河北省	河北	河北2020	4.85203	0.0220907	李世刚	26052020李世刚	独立董事	1		唐松莲	26052020唐松莲	独立董事	1	0	姚硕榆	26052020姚硕榆	副董事长,副总经理	0			26052020	#N/A	0			26052020	#N/A	0			26052020	#N/A	0			26052020	#N/A	0			26052020	#N/A	0			26052020
2605	2023	26052023	河北省	河北	河北2023	9.04157	#N/A	江英	26052023江英	独立董事	1		姚硕榆	26052023姚硕榆	副董事长,副总经理	0		李世刚	26052023李世刚	独立董事	1	0		26052023	#N/A	0			26052023	#N/A	0			26052023	#N/A	0			26052023	#N/A	0			26052023	#N/A	0			26052023
2607	2021	26072021	安徽省	安徽	安徽2021	9.33433	0.0165682	佟岩	26072021佟岩	独立董事	1		王强	26072021王强	独立董事	1	1	石磊	26072021石磊	董事	0			26072021	#N/A	0			26072021	#N/A	0			26072021	#N/A	0			26072021	#N/A	0			26072021	#N/A	0			26072021
2608	2012	26082012	安徽省	安徽	安徽2012	1.60944	0.0183712		26082012	#N/A	0			26082012	#N/A	0			26082012	#N/A	0			26082012	#N/A	0			26082012	#N/A	0			26082012	#N/A	0			26082012	#N/A	0			26082012	#N/A	0			26082012
2609	2014	26092014	江苏省	江苏	江苏2014	#N/A	0.0247383	桑涛	26092014桑涛	独立董事	1		李伟相	26092014李伟相	独立董事	1	0	赵勇	26092014赵勇	董事,营运总监	0			26092014	#N/A	0			26092014	#N/A	0			26092014	#N/A	0			26092014	#N/A	0			26092014	#N/A	0			26092014
2609	2015	26092015	江苏省	江苏	江苏2015	#N/A	0.0237915	桑涛	26092015桑涛	独立董事	1		李伟相	26092015李伟相	独立董事	1	0	赵勇	26092015赵勇	非独立董事,总经理	0			26092015	#N/A	0			26092015	#N/A	0			26092015	#N/A	0			26092015	#N/A	0			26092015	#N/A	0			26092015
2609	2016	26092016	江苏省	江苏	江苏2016	0.693147	0.0231946	张建军	26092016张建军	独立董事	1		李伟相	26092016李伟相	独立董事	1	0	周毓	26092016周毓	董事,营运总监,生产总监	0			26092016	#N/A	0			26092016	#N/A	0			26092016	#N/A	0			26092016	#N/A	0			26092016	#N/A	0			26092016
2609	2017	26092017	江苏省	江苏	江苏2017	2.48491	0.0210849	张建军	26092017张建军	独立董事	1		李伟相	26092017李伟相	独立董事	1	0	周毓	26092017周毓	董事,营运总监	0			26092017	#N/A	0			26092017	#N/A	0			26092017	#N/A	0			26092017	#N/A	0			26092017	#N/A	0			26092017
2610	2016	26102016	江苏省	江苏	江苏2016	0.693147	0.0231946	刘丹萍	26102016刘丹萍	独立董事	1	1	袁淳	26102016袁淳	独立董事	1	0	徐国辉	26102016徐国辉	董事	0			26102016	#N/A	0			26102016	#N/A	0			26102016	#N/A	0			26102016	#N/A	0			26102016	#N/A	0			26102016
2610	2017	26102017	江苏省	江苏	江苏2017	2.48491	0.0210849	刘丹萍	26102017刘丹萍	独立董事	1	1	何前	26102017何前	独立董事	1	0	徐国辉	26102017徐国辉	董事	0			26102017	#N/A	0			26102017	#N/A	0			26102017	#N/A	0			26102017	#N/A	0			26102017	#N/A	0			26102017
2610	2023	26102023	江苏省	江苏	江苏2023	9.39632	#N/A	徐锦荣	26102023徐锦荣	独立董事	1		刘会荪	26102023刘会荪	独立董事	1	0	施周祥	26102023施周祥	非独立董事,高级副总裁,财务总监	0			26102023	#N/A	0			26102023	#N/A	0			26102023	#N/A	0			26102023	#N/A	0			26102023	#N/A	0			26102023
2612	2014	26122014	北京市	北京	北京2014	#N/A	0.0259314	常青	26122014常青	独立董事	1	1	申东日	26122014申东日	董事长	0		王世定	26122014王世定	独立董事	1	0		26122014	#N/A	0			26122014	#N/A	0			26122014	#N/A	0			26122014	#N/A	0			26122014	#N/A	0			26122014
2613	2011	26132011	北京市	北京	北京2011	#N/A	0.0196226	金文辉	26132011金文辉	独立董事	1		董家臣	26132011董家臣	独立董事	1	0	高学林	26132011高学林	董事,副总经理	0			26132011	#N/A	0			26132011	#N/A	0			26132011	#N/A	0			26132011	#N/A	0			26132011	#N/A	0			26132011
2618	2014	26182014	浙江省	浙江	浙江2014	#N/A	0.0278689	龚艳	26182014龚艳	独立董事	1		赖延清	26182014赖延清	独立董事	1	0	益天鹏	26182014益天鹏	董事	0			26182014	#N/A	0			26182014	#N/A	0			26182014	#N/A	0			26182014	#N/A	0			26182014	#N/A	0			26182014
2618	2015	26182015	浙江省	浙江	浙江2015	0.693147	0.022429	潘玲曼	26182015潘玲曼	独立董事	1		陈文彬	26182015陈文彬	独立董事	1	0	刘文魁	26182015刘文魁	董事	0			26182015	#N/A	0			26182015	#N/A	0			26182015	#N/A	0			26182015	#N/A	0			26182015	#N/A	0			26182015
2619	2017	26192017	浙江省	浙江	浙江2017	1.09861	0.0181469	郝玉贵	26192017郝玉贵	独立董事	1		陆竞红	26192017陆竞红	#N/A	0		刘汉玉	26192017刘汉玉	董事,董事会秘书	0			26192017	#N/A	0			26192017	#N/A	0			26192017	#N/A	0			26192017	#N/A	0			26192017	#N/A	0			26192017
2619	2018	26192018	浙江省	浙江	浙江2018	1.79176	0.0193728	陈文清	26192018陈文清	独立董事	1	1	朱谦	26192018朱谦	独立董事	1	0	刘汉玉	26192018刘汉玉	董事,财务总监	0			26192018	#N/A	0			26192018	#N/A	0			26192018	#N/A	0			26192018	#N/A	0			26192018	#N/A	0			26192018
2619	2019	26192019	浙江省	浙江	浙江2019	4.81218	0.0120027	陈文清	26192019陈文清	独立董事	1	1	朱谦	26192019朱谦	独立董事	1	0	刘汉玉	26192019刘汉玉	董事,财务总监	0			26192019	#N/A	0			26192019	#N/A	0			26192019	#N/A	0			26192019	#N/A	0			26192019	#N/A	0			26192019
2619	2020	26192020	浙江省	浙江	浙江2020	4.26268	0.0131053	陈文清	26192020陈文清	独立董事	1		朱谦	26192020朱谦	独立董事	1	0	刘汉玉	26192020刘汉玉	董事,财务总监	0			26192020	#N/A	0			26192020	#N/A	0			26192020	#N/A	0			26192020	#N/A	0			26192020	#N/A	0			26192020
2620	2014	26202014	浙江省	浙江	浙江2014	#N/A	0.0278689	叶志彪	26202014叶志彪	董事,副总经理,董事会秘书	0		何文祥	26202014何文祥	独立董事	1	1	高海军	26202014高海军	独立董事	1	0		26202014	#N/A	0			26202014	#N/A	0			26202014	#N/A	0			26202014	#N/A	0			26202014	#N/A	0			26202014
2620	2017	26202017	浙江省	浙江	浙江2017	1.09861	0.0181469	叶志彪	26202017叶志彪	董事,总经理	0		刘平春	26202017刘平春	独立董事	1	0	孙进山	26202017孙进山	独立董事	1	0		26202017	#N/A	0			26202017	#N/A	0			26202017	#N/A	0			26202017	#N/A	0			26202017	#N/A	0			26202017
2620	2019	26202019	浙江省	浙江	浙江2019	4.81218	0.0120027	胡正富	26202019胡正富	董事,总经理	0		庄志伟	26202019庄志伟	独立董事	1	0	孙进山	26202019孙进山	独立董事	1	1		26202019	#N/A	0			26202019	#N/A	0			26202019	#N/A	0			26202019	#N/A	0			26202019	#N/A	0			26202019
2621	2012	26212012	浙江省	浙江	浙江2012	#N/A	0.019422		26212012	#N/A	0			26212012	#N/A	0			26212012	#N/A	0			26212012	#N/A	0			26212012	#N/A	0			26212012	#N/A	0			26212012	#N/A	0			26212012	#N/A	0			26212012
2621	2014	26212014	浙江省	浙江	浙江2014	#N/A	0.0278689	付蓉	26212014付蓉	独立董事	1		周清华	26212014周清华	独立董事	1	0	金秉铎	26212014金秉铎	董事,总经理,董事会秘书	0			26212014	#N/A	0			26212014	#N/A	0			26212014	#N/A	0			26212014	#N/A	0			26212014	#N/A	0			26212014
2621	2015	26212015	浙江省	浙江	浙江2015	0.693147	0.022429	付蓉	26212015付蓉	独立董事	1		周清华	26212015周清华	独立董事	1	0	金秉铎	26212015金秉铎	董事,总经理,董事会秘书	0			26212015	#N/A	0			26212015	#N/A	0			26212015	#N/A	0			26212015	#N/A	0			26212015	#N/A	0			26212015
2621	2019	26212019	浙江省	浙江	浙江2019	4.81218	0.0120027	李阳	26212019李阳	独立董事	1		郑联盛	26212019郑联盛	独立董事	1	0	朱剑楠	26212019朱剑楠	董事	0			26212019	#N/A	0			26212019	#N/A	0			26212019	#N/A	0			26212019	#N/A	0			26212019	#N/A	0			26212019
2622	2011	26222011	浙江省	浙江	浙江2011	#N/A	0.0219653		26222011	#N/A	0			26222011	#N/A	0			26222011	#N/A	0			26222011	#N/A	0			26222011	#N/A	0			26222011	#N/A	0			26222011	#N/A	0			26222011	#N/A	0			26222011
2622	2012	26222012	浙江省	浙江	浙江2012	#N/A	0.019422		26222012	#N/A	0			26222012	#N/A	0			26222012	#N/A	0			26222012	#N/A	0			26222012	#N/A	0			26222012	#N/A	0			26222012	#N/A	0			26222012	#N/A	0			26222012
2622	2013	26222013	浙江省	浙江	浙江2013	#N/A	0.0203306		26222013	#N/A	0			26222013	#N/A	0			26222013	#N/A	0			26222013	#N/A	0			26222013	#N/A	0			26222013	#N/A	0			26222013	#N/A	0			26222013	#N/A	0			26222013
2622	2014	26222014	浙江省	浙江	浙江2014	#N/A	0.0278689	韩波	26222014韩波	独立董事	1		吕永祥	26222014吕永祥	董事长,董事,总经理	0		张茂	26222014张茂	独立董事	1	0		26222014	#N/A	0			26222014	#N/A	0			26222014	#N/A	0			26222014	#N/A	0			26222014	#N/A	0			26222014
2622	2020	26222020	浙江省	浙江	浙江2020	4.26268	0.0131053	韩光	26222020韩光	独立董事	1		尹宏伟	26222020尹宏伟	董事长,董事会秘书(代理)	0		于雷	26222020于雷	独立董事	1	0		26222020	#N/A	0			26222020	#N/A	0			26222020	#N/A	0			26222020	#N/A	0			26222020	#N/A	0			26222020
2624	2014	26242014	浙江省	浙江	浙江2014	#N/A	0.0278689	鲁爱民	26242014鲁爱民	独立董事	1		魏松	26242014魏松	董事,董事会秘书	0		李根美	26242014李根美	独立董事	1	0		26242014	#N/A	0			26242014	#N/A	0			26242014	#N/A	0			26242014	#N/A	0			26242014	#N/A	0			26242014
2624	2015	26242015	浙江省	浙江	浙江2015	0.693147	0.022429	施丹丹	26242015施丹丹	独立董事	1		董弘宇	26242015董弘宇	独立董事	1	0	曾映雪	26242015曾映雪	非独立董事,副总经理,财务总监	0			26242015	#N/A	0			26242015	#N/A	0			26242015	#N/A	0			26242015	#N/A	0			26242015	#N/A	0			26242015
2629	2022	26292022	广东省	广东	广东2022	9.96857	0.0155058	傅冠强	26292022傅冠强	独立董事	1		李薇薇	26292022李薇薇	独立董事	1	0	陈泽虹	26292022陈泽虹	董事	0			26292022	#N/A	0			26292022	#N/A	0			26292022	#N/A	0			26292022	#N/A	0			26292022	#N/A	0			26292022
2629	2023	26292023	广东省	广东	广东2023	9.88283	#N/A	吴申军	26292023吴申军	独立董事	1		尹玉刚	26292023尹玉刚	独立董事	1	0	陈泽虹	26292023陈泽虹	董事	0			26292023	#N/A	0			26292023	#N/A	0			26292023	#N/A	0			26292023	#N/A	0			26292023	#N/A	0			26292023
2631	2014	26312014	广东省	广东	广东2014	#N/A	0.0224623	郑海英	26312014郑海英	独立董事	1		蒋志培	26312014蒋志培	独立董事	1	0	姚红鹏	26312014姚红鹏	董事,副总经理	0			26312014	#N/A	0			26312014	#N/A	0			26312014	#N/A	0			26312014	#N/A	0			26312014	#N/A	0			26312014
2631	2015	26312015	广东省	广东	广东2015	0.693147	0.0185536	郑海英	26312015郑海英	独立董事	1		白明	26312015白明	独立董事	1	0	姚红鹏	26312015姚红鹏	董事,副总经理	0			26312015	#N/A	0			26312015	#N/A	0			26312015	#N/A	0			26312015	#N/A	0			26312015	#N/A	0			26312015
2631	2019	26312019	广东省	广东	广东2019	2.77259	0.0140111	张颂勋	26312019张颂勋	独立董事	1		盛绪芯	26312019盛绪芯	独立董事	1	0	姚红鹏	26312019姚红鹏	董事,副总经理	0			26312019	#N/A	0			26312019	#N/A	0			26312019	#N/A	0			26312019	#N/A	0			26312019	#N/A	0			26312019
2631	2020	26312020	广东省	广东	广东2020	2.83321	0.0174561	张颂勋	26312020张颂勋	独立董事	1		盛绪芯	26312020盛绪芯	独立董事	1	0	姚红鹏	26312020姚红鹏	董事,副总经理	0			26312020	#N/A	0			26312020	#N/A	0			26312020	#N/A	0			26312020	#N/A	0			26312020	#N/A	0			26312020
2632	2023	26322023	广东省	广东	广东2023	9.88283	#N/A	陈连勇	26322023陈连勇	独立董事	1		胡智彪	26322023胡智彪	董事长,总经理	0		李海峰	26322023李海峰	独立董事	1	0		26322023	#N/A	0			26322023	#N/A	0			26322023	#N/A	0			26322023	#N/A	0			26322023	#N/A	0			26322023
2633	2014	26332014	广东省	广东	广东2014	#N/A	0.0224623	蔡乐华	26332014蔡乐华	独立董事	1		何建东	26332014何建东	董事,总经理	0		邵少敏	26332014邵少敏	独立董事	1	0		26332014	#N/A	0			26332014	#N/A	0			26332014	#N/A	0			26332014	#N/A	0			26332014	#N/A	0			26332014
2633	2015	26332015	广东省	广东	广东2015	0.693147	0.0185536	蔡乐华	26332015蔡乐华	独立董事	1		何建东	26332015何建东	总经理,董事	0		邵少敏	26332015邵少敏	独立董事	1	0		26332015	#N/A	0			26332015	#N/A	0			26332015	#N/A	0			26332015	#N/A	0			26332015	#N/A	0			26332015
2633	2018	26332018	广东省	广东	广东2018	2.56495	0.0175543	蔡乐华	26332018蔡乐华	独立董事	1		余关健	26332018余关健	独立董事	1	0	何建南	26332018何建南	董事长,董事,总经理	0			26332018	#N/A	0			26332018	#N/A	0			26332018	#N/A	0			26332018	#N/A	0			26332018	#N/A	0			26332018
2633	2020	26332020	广东省	广东	广东2020	2.83321	0.0174561	蔡乐华	26332020蔡乐华	独立董事	1		余关健	26332020余关健	独立董事	1	0	何建南	26332020何建南	董事长,董事,总经理	0			26332020	#N/A	0			26332020	#N/A	0			26332020	#N/A	0			26332020	#N/A	0			26332020	#N/A	0			26332020
2633	2022	26332022	广东省	广东	广东2022	9.96857	0.0155058	蔡乐华	26332022蔡乐华	独立董事	1		余关健	26332022余关健	独立董事	1	0	何建南	26332022何建南	董事长,董事,总经理	0			26332022	#N/A	0			26332022	#N/A	0			26332022	#N/A	0			26332022	#N/A	0			26332022	#N/A	0			26332022
2633	2023	26332023	广东省	广东	广东2023	9.88283	#N/A	蔡乐华	26332023蔡乐华	独立董事	1		余关健	26332023余关健	独立董事	1	0	何建南	26332023何建南	董事长,董事,总经理,董事会秘书(代理)	0			26332023	#N/A	0			26332023	#N/A	0			26332023	#N/A	0			26332023	#N/A	0			26332023	#N/A	0			26332023
2634	2019	26342019	广东省	广东	广东2019	2.77259	0.0140111	陶宝山	26342019陶宝山	独立董事	1		孙锋	26342019孙锋	独立董事	1	0	高婷	26342019高婷	副董事长,副总经理	0			26342019	#N/A	0			26342019	#N/A	0			26342019	#N/A	0			26342019	#N/A	0			26342019	#N/A	0			26342019
2635	2012	26352012	广东省	广东	广东2012	0.693147	0.0230561		26352012	#N/A	0			26352012	#N/A	0			26352012	#N/A	0			26352012	#N/A	0			26352012	#N/A	0			26352012	#N/A	0			26352012	#N/A	0			26352012	#N/A	0			26352012
2635	2014	26352014	江苏省	江苏	江苏2014	#N/A	0.0247383	罗正英	26352014罗正英	独立董事	1		孙林夫	26352014孙林夫	独立董事	1	0	顾奇峰	26352014顾奇峰	董事	0			26352014	#N/A	0			26352014	#N/A	0			26352014	#N/A	0			26352014	#N/A	0			26352014	#N/A	0			26352014
2636	2020	26362020	江苏省	江苏	江苏2020	3.17805	0.0181944	周昌生	26362020周昌生	独立董事	1		姚超豪	26362020姚超豪	独立董事	1	0	朱程岗	26362020朱程岗	董事,副总裁	0			26362020	#N/A	0			26362020	#N/A	0			26362020	#N/A	0			26362020	#N/A	0			26362020	#N/A	0			26362020
2636	2022	26362022	江苏省	江苏	江苏2022	9.38597	0.0208616	周昌生	26362022周昌生	独立董事	1		方纯	26362022方纯	独立董事	1	0	朱程岗	26362022朱程岗	董事,副总裁	0			26362022	#N/A	0			26362022	#N/A	0			26362022	#N/A	0			26362022	#N/A	0			26362022	#N/A	0			26362022
2636	2023	26362023	江苏省	江苏	江苏2023	9.39632	#N/A	周昌生	26362023周昌生	独立董事	1		方纯	26362023方纯	独立董事	1	0	朱程岗	26362023朱程岗	董事,副总裁	0			26362023	#N/A	0			26362023	#N/A	0			26362023	#N/A	0			26362023	#N/A	0			26362023	#N/A	0			26362023
2637	2017	26372017	江苏省	江苏	江苏2017	2.48491	0.0210849	许荣年	26372017许荣年	董事,副总经理	0		徐亚明	26372017徐亚明	独立董事	1	0	钟明强	26372017钟明强	独立董事	1	0		26372017	#N/A	0			26372017	#N/A	0			26372017	#N/A	0			26372017	#N/A	0			26372017	#N/A	0			26372017
2639	2011	26392011	福建省	福建	福建2011	0.693147	0.0172949		26392011	#N/A	0			26392011	#N/A	0			26392011	#N/A	0			26392011	#N/A	0			26392011	#N/A	0			26392011	#N/A	0			26392011	#N/A	0			26392011	#N/A	0			26392011
2639	2019	26392019	福建省	福建	福建2019	3.13549	0.0220985	潘琰	26392019潘琰	独立董事	1	1	曾政林	26392019曾政林	独立董事	1	0	林汝捷2	26392019林汝捷2	董事,常务副总经理	0			26392019	#N/A	0			26392019	#N/A	0			26392019	#N/A	0			26392019	#N/A	0			26392019	#N/A	0			26392019
2640	2014	26402014	福建省	福建	福建2014	#N/A	0.0233178	赵利新	26402014赵利新	独立董事	1		容和平	26402014容和平	独立董事	1	0	刘文宪	26402014刘文宪	董事	0			26402014	#N/A	0			26402014	#N/A	0			26402014	#N/A	0			26402014	#N/A	0			26402014	#N/A	0			26402014
2640	2015	26402015	山西省	山西	山西2015	#N/A	0.0228082	赵利新	26402015赵利新	独立董事	1		容和平	26402015容和平	独立董事	1	0	徐佳东	26402015徐佳东	副董事长,副总经理	0			26402015	#N/A	0			26402015	#N/A	0			26402015	#N/A	0			26402015	#N/A	0			26402015	#N/A	0			26402015
2640	2016	26402016	山西省	山西	山西2016	0.693147	0.0223427	杨波	26402016杨波	独立董事	1		欧阳建国	26402016欧阳建国	独立董事	1	0	徐佳东	26402016徐佳东	副董事长,副总经理	0			26402016	#N/A	0			26402016	#N/A	0			26402016	#N/A	0			26402016	#N/A	0			26402016	#N/A	0			26402016
2645	2015	26452015	山东省	山东	山东2015	4.15888	0.0157355	范永明	26452015范永明	独立董事	1		朱大勇	26452015朱大勇	董事,副总经理,财务总监,董事会秘书	0		李连军	26452015李连军	独立董事	1	0		26452015	#N/A	0			26452015	#N/A	0			26452015	#N/A	0			26452015	#N/A	0			26452015	#N/A	0			26452015
2645	2017	26452017	山东省	山东	山东2017	2.07944	0.0146452	范永明	26452017范永明	独立董事	1		朱大勇	26452017朱大勇	董事,副总经理,财务总监,董事会秘书	0		王玉春	26452017王玉春	独立董事	1	0		26452017	#N/A	0			26452017	#N/A	0			26452017	#N/A	0			26452017	#N/A	0			26452017	#N/A	0			26452017
2645	2018	26452018	山东省	山东	山东2018	2.3979	0.0165044	范永明	26452018范永明	独立董事	1		朱大勇	26452018朱大勇	董事,副总经理,财务总监,董事会秘书	0		王玉春	26452018王玉春	独立董事	1	0		26452018	#N/A	0			26452018	#N/A	0			26452018	#N/A	0			26452018	#N/A	0			26452018	#N/A	0			26452018
2647	2019	26472019	青海省	青海	青海2019	1.09861	0.0289928	狄瑞鹏	26472019狄瑞鹏	独立董事	1		柴晓丽	26472019柴晓丽	独立董事	1	0	王石山	26472019王石山	副董事长,总经理,财务总监	0			26472019	#N/A	0			26472019	#N/A	0			26472019	#N/A	0			26472019	#N/A	0			26472019	#N/A	0			26472019
2648	2018	26482018	浙江省	浙江	浙江2018	1.79176	0.0193728	潘煜双	26482018潘煜双	独立董事	1		费锦红	26482018费锦红	独立董事	1	0	杨玉英	26482018杨玉英	董事,副董事长	0			26482018	#N/A	0			26482018	#N/A	0			26482018	#N/A	0			26482018	#N/A	0			26482018	#N/A	0			26482018
2648	2020	26482020	浙江省	浙江	浙江2020	4.26268	0.0131053	潘煜双	26482020潘煜双	独立董事	1		费锦红	26482020费锦红	独立董事	1	0	杨玉英	26482020杨玉英	董事,副董事长	0			26482020	#N/A	0			26482020	#N/A	0			26482020	#N/A	0			26482020	#N/A	0			26482020	#N/A	0			26482020
2652	2016	26522016	浙江省	浙江	浙江2016	1.09861	0.026311	赵焕琪	26522016赵焕琪	独立董事	1		叶树理	26522016叶树理	独立董事	1	0	金跃国	26522016金跃国	董事会秘书,董事	0			26522016	#N/A	0			26522016	#N/A	0			26522016	#N/A	0			26522016	#N/A	0			26522016	#N/A	0			26522016
2652	2017	26522017	浙江省	浙江	浙江2017	1.09861	0.0181469	赵焕琪	26522017赵焕琪	独立董事	1		叶树理	26522017叶树理	独立董事	1	0	金跃国	26522017金跃国	董事,董事会秘书	0			26522017	#N/A	0			26522017	#N/A	0			26522017	#N/A	0			26522017	#N/A	0			26522017	#N/A	0			26522017
2655	2017	26552017	西藏自治区	西藏	西藏2017	#N/A	0.0180559	张宏	26552017张宏	#N/A	0		古群	26552017古群	#N/A	0		王永刚	26552017王永刚	副总经理,董事会秘书	0			26552017	#N/A	0			26552017	#N/A	0			26552017	#N/A	0			26552017	#N/A	0			26552017	#N/A	0			26552017
2655	2018	26552018	西藏自治区	西藏	西藏2018	1.38629	0.0217324	王立彦	26552018王立彦	独立董事	1	1	杨步湘	26552018杨步湘	独立董事	1	0	章调占	26552018章调占	非独立董事	0			26552018	#N/A	0			26552018	#N/A	0			26552018	#N/A	0			26552018	#N/A	0			26552018	#N/A	0			26552018
2656	2015	26562015	广东省	广东	广东2015	0.693147	0.0185536	林峰国	26562015林峰国	董事,董事会秘书,财务总监	0		刘运国	26562015刘运国	独立董事	1	0	郭葆春	26562015郭葆春	独立董事	1	0		26562015	#N/A	0			26562015	#N/A	0			26562015	#N/A	0			26562015	#N/A	0			26562015	#N/A	0			26562015
2656	2016	26562016	广东省	广东	广东2016	1.94591	0.0237664	林峰国	26562016林峰国	董事,董事会秘书,财务总监	0		刘运国	26562016刘运国	独立董事	1	0	郭葆春	26562016郭葆春	独立董事	1	0		26562016	#N/A	0			26562016	#N/A	0			26562016	#N/A	0			26562016	#N/A	0			26562016	#N/A	0			26562016
2656	2023	26562023	广东省	广东	广东2023	9.88283	#N/A	林毅超	26562023林毅超	董事长,董事,总经理	0		翁文芳	26562023翁文芳	非独立董事,董事会秘书,副总经理	0		陈凯敏	26562023陈凯敏	独立董事	1	0	仉鹏	26562023仉鹏	独立董事	1	0	裘爽	26562023裘爽	独立董事	1	0		26562023	#N/A	0			26562023	#N/A	0			26562023	#N/A	0			26562023
2657	2018	26572018	广东省	广东	广东2018	2.56495	0.0175543	赵燕	26572018赵燕	独立董事	1		顾凌云	26572018顾凌云	独立董事	1	0	赵学荣	26572018赵学荣	董事,副总经理,财务总监	0			26572018	#N/A	0			26572018	#N/A	0			26572018	#N/A	0			26572018	#N/A	0			26572018	#N/A	0			26572018
2657	2019	26572019	广东省	广东	广东2019	2.77259	0.0140111	赵燕	26572019赵燕	独立董事	1		顾凌云	26572019顾凌云	独立董事	1	0	赵学荣	26572019赵学荣	董事,副总经理,财务总监	0			26572019	#N/A	0			26572019	#N/A	0			26572019	#N/A	0			26572019	#N/A	0			26572019	#N/A	0			26572019
2657	2020	26572020	广东省	广东	广东2020	2.83321	0.0174561	刘书锦	26572020刘书锦	独立董事	1		顾凌云	26572020顾凌云	独立董事	1	0	赵学荣	26572020赵学荣	董事	0			26572020	#N/A	0			26572020	#N/A	0			26572020	#N/A	0			26572020	#N/A	0			26572020	#N/A	0			26572020
2657	2023	26572023	广东省	广东	广东2023	9.88283	#N/A	刘书锦	26572023刘书锦	独立董事	1		赵燕	26572023赵燕	独立董事	1	0	秦彪	26572023秦彪	非独立董事,副总经理,财务总监	0			26572023	#N/A	0			26572023	#N/A	0			26572023	#N/A	0			26572023	#N/A	0			26572023	#N/A	0			26572023
2658	2018	26582018	广东省	广东	广东2018	2.56495	0.0175543	吴国平	26582018吴国平	独立董事	1		周黎安	26582018周黎安	独立董事	1	0	敖小强	26582018敖小强	董事长,总经理,董事	0			26582018	#N/A	0			26582018	#N/A	0			26582018	#N/A	0			26582018	#N/A	0			26582018	#N/A	0			26582018
2659	2014	26592014	广东省	广东	广东2014	#N/A	0.0224623	张耀	26592014张耀	董事	0		占世向	26592014占世向	独立董事	1	0	陈枫	26592014陈枫	独立董事	1	0		26592014	#N/A	0			26592014	#N/A	0			26592014	#N/A	0			26592014	#N/A	0			26592014	#N/A	0			26592014
2661	2017	26612017	广东省	广东	广东2017	2.70805	0.0163228	李庆龙	26612017李庆龙	独立董事	1		舒畅	26612017舒畅	独立董事	1	0	陈晖	26612017陈晖	董事	0			26612017	#N/A	0			26612017	#N/A	0			26612017	#N/A	0			26612017	#N/A	0			26612017	#N/A	0			26612017
2661	2018	26612018	广东省	广东	广东2018	2.56495	0.0175543	李庆龙	26612018李庆龙	独立董事	1		舒畅	26612018舒畅	独立董事	1	0	陈晖	26612018陈晖	董事	0			26612018	#N/A	0			26612018	#N/A	0			26612018	#N/A	0			26612018	#N/A	0			26612018	#N/A	0			26612018
2662	2012	26622012	广东省	广东	广东2012	0.693147	0.0230561		26622012	#N/A	0			26622012	#N/A	0			26622012	#N/A	0			26622012	#N/A	0			26622012	#N/A	0			26622012	#N/A	0			26622012	#N/A	0			26622012	#N/A	0			26622012
2662	2013	26622013	广东省	广东	广东2013	#N/A	0.0237707		26622013	#N/A	0			26622013	#N/A	0			26622013	#N/A	0			26622013	#N/A	0			26622013	#N/A	0			26622013	#N/A	0			26622013	#N/A	0			26622013	#N/A	0			26622013
2662	2014	26622014	广东省	广东	广东2014	#N/A	0.0224623	马朝松	26622014马朝松	独立董事	1		金锦萍	26622014金锦萍	独立董事	1	0	汉斯·皮特·克鲁夫特	26622014汉斯·皮特·克鲁夫特	董事	0			26622014	#N/A	0			26622014	#N/A	0			26622014	#N/A	0			26622014	#N/A	0			26622014	#N/A	0			26622014
2662	2016	26622016	广东省	广东	广东2016	1.94591	0.0237664	马朝松	26622016马朝松	独立董事	1		金锦萍	26622016金锦萍	独立董事	1	0	龚斌	26622016龚斌	董事	0		汉斯·皮特·克鲁夫特	26622016汉斯·皮特·克鲁夫特	董事	0			26622016	#N/A	0			26622016	#N/A	0			26622016	#N/A	0			26622016	#N/A	0			26622016
2663	2015	26632015	广东省	广东	广东2015	0.693147	0.0185536	柳絮	26632015柳絮	独立董事	1		袁奇峰	26632015袁奇峰	独立董事	1	1	杨小强	26632015杨小强	独立董事	1	0		26632015	#N/A	0			26632015	#N/A	0			26632015	#N/A	0			26632015	#N/A	0			26632015	#N/A	0			26632015
2665	2012	26652012	广东省	广东	广东2012	0.693147	0.0230561		26652012	#N/A	0			26652012	#N/A	0			26652012	#N/A	0			26652012	#N/A	0			26652012	#N/A	0			26652012	#N/A	0			26652012	#N/A	0			26652012	#N/A	0			26652012
2665	2018	26652018	广东省	广东	广东2018	2.56495	0.0175543	耿建新	26652018耿建新	#N/A	0		李增耀	26652018李增耀	独立董事	1	1	李坚	26652018李坚	非独立董事	0			26652018	#N/A	0			26652018	#N/A	0			26652018	#N/A	0			26652018	#N/A	0			26652018	#N/A	0			26652018
2665	2019	26652019	广东省	广东	广东2019	2.77259	0.0140111	耿建新	26652019耿建新	#N/A	0		李增耀	26652019李增耀	独立董事	1	1	李坚	26652019李坚	非独立董事	0			26652019	#N/A	0			26652019	#N/A	0			26652019	#N/A	0			26652019	#N/A	0			26652019	#N/A	0			26652019
2666	2014	26662014	广东省	广东	广东2014	#N/A	0.0224623	许辉	26662014许辉	独立董事	1		李攻科	26662014李攻科	独立董事	1	0	徐庆芳	26662014徐庆芳	董事,副总经理	0		李晓帆	26662014李晓帆	独立董事	1	0		26662014	#N/A	0			26662014	#N/A	0			26662014	#N/A	0			26662014	#N/A	0			26662014
2666	2015	26662015	广东省	广东	广东2015	0.693147	0.0185536	梁锦棋	26662015梁锦棋	独立董事	1		黄劲业	26662015黄劲业	独立董事	1	0	徐庆芳	26662015徐庆芳	董事,副总经理	0			26662015	#N/A	0			26662015	#N/A	0			26662015	#N/A	0			26662015	#N/A	0			26662015	#N/A	0			26662015
2666	2016	26662016	广东省	广东	广东2016	1.94591	0.0237664	梁锦棋	26662016梁锦棋	独立董事	1		黄劲业	26662016黄劲业	独立董事	1	0	徐庆芳	26662016徐庆芳	董事,副总经理	0			26662016	#N/A	0			26662016	#N/A	0			26662016	#N/A	0			26662016	#N/A	0			26662016	#N/A	0			26662016
2667	2015	26672015	广东省	广东	广东2015	0.693147	0.0185536	王景升	26672015王景升	独立董事	1		程国彬	26672015程国彬	独立董事	1	0	戴国富	26672015戴国富	独立董事	1	0	温萍	26672015温萍	董事,总经理	0		梁晓东	26672015梁晓东	董事,副总经理	0			26672015	#N/A	0			26672015	#N/A	0			26672015	#N/A	0			26672015
2667	2016	26672016	广东省	广东	广东2016	1.94591	0.0237664	王君	26672016王君	独立董事	1		程国彬	26672016程国彬	独立董事	1	0	戴国富	26672016戴国富	独立董事	1	0	温萍	26672016温萍	总经理,董事	0		梁晓东	26672016梁晓东	董事,副总经理	0			26672016	#N/A	0			26672016	#N/A	0			26672016	#N/A	0			26672016
2668	2016	26682016	广东省	广东	广东2016	1.94591	0.0237664	张松柏	26682016张松柏	独立董事	1		朱玉杰	26682016朱玉杰	独立董事	1	0	权秀洁	26682016权秀洁	非独立董事,财务总监,副总经理	0			26682016	#N/A	0			26682016	#N/A	0			26682016	#N/A	0			26682016	#N/A	0			26682016	#N/A	0			26682016
2674	2020	26742020	福建省	福建	福建2020	2.63906	0.0207933	张白	26742020张白	独立董事	1		林建东	26742020林建东	独立董事	1	0	吴华春	26742020吴华春	董事长	0			26742020	#N/A	0			26742020	#N/A	0			26742020	#N/A	0			26742020	#N/A	0			26742020	#N/A	0			26742020
2675	2021	26752021	福建省	福建	福建2021	8.30746	0.0199173	赵大勇	26752021赵大勇	独立董事	1		由守谊	26752021由守谊	董事长	0		李方	26752021李方	独立董事	1	0		26752021	#N/A	0			26752021	#N/A	0			26752021	#N/A	0			26752021	#N/A	0			26752021	#N/A	0			26752021
2677	2017	26772017	福建省	福建	福建2017	1.94591	0.0220731	张红英	26772017张红英	独立董事	1		夏鼎	26772017夏鼎	总经理,董事,董事长,副董事长	0		王培飞	26772017王培飞	董事,副总经理,财务负责人	0		靳明	26772017靳明	独立董事	1	0		26772017	#N/A	0			26772017	#N/A	0			26772017	#N/A	0			26772017	#N/A	0			26772017
[truncated: 49,149 more rows]
[truncated: 25 more columns]

## Sheet: Sheet2
		21.7361

## Sheet: 变量定义
变量类型	变量名称	变量符号	变量解释
[truncated: 16 more rows]
